# Supplementary material for: Hydroponically Grown Sanguisorba minor Scop.: Effects of Cut and Storage on Fresh-Cut Produce
Source: Antioxidants (Basel). 2019 Dec 9;8(12):631. doi: 10.3390/antiox8120631 (PMC6943539; doi:10.3390/antiox8120631)
Supplement: Supplementary file 1 [file antioxidants-08-00631-s001.xlsx]

## Sheet: Table S1
Compound	Class	S. minor C2	S. minor C2	S. minor C2	S. minor C2	S. minor C2	S. minor C2		S. minor C1	S. minor C1	S. minor C1	S. minor C1	S. minor C1	S. minor C1		Annotations	Composite Spectrum
Nepetin	Flavonoids	2050627	1977852	1758434	1728967	1761738	721494		413543	1426655	391481	2591355	804794	1580790		Nepetin [ C16 H12 O7, tgt=49.48, overall=49.48 ]	(318.06525, 2613.6687)(318.72964, 1453.3301)(318.40256, 7710.2617)(318.06378, 2740.0981)(302.56357, 1267.9434)(335.95535, 4163.9854)(336.90002, 2402.886)(319.72897, 5197.0273)(320.0917, 3625.0696)(341.4553, 1478.0612)(325.30173, 3425.4062)(325.0448, 355.37)
Pelargonidin 3,5-O-diglucoside	Flavonoids	438747	475380	907698	910943	813709	1		1	1	9789137	9579172	1	764028		Pelargonidin 3,5-O-diglucoside [ C27 H31 O15, tgt=40.93, overall=40.93 ]	(601.18115, 310.435)(580.04913, 14671.311)(580.84436, 3843.4968)(581.57666, 1306.142)(613.20715, 4023.2852)(614.2174, 505.51)(595.858, 14251.903)(596.1927, 1882.9371)(621.1699, 1847.95)
(+)-Catechin	Flavonoids	977943	951626	1058087	1035233	962280	942592		1	1967435	322648	329559	1102923	936997		(+)-Catechin [ C15 H14 O6, tgt=64.64, overall=64.64 ]	(290.7448, 4718.1147)(276.7501, 20766.26)(293.09427, 6643.2095)(294.0961, 1513.25)(275.39777, 38156.62)(276.369, 3448.5305)(308.1146, 10927.498)(309.11707, 2371.8252)(292.7739, 1239.0868)(317.5785, 1277.6499)(295.79373, 6807.422)(297.0642, 461.61)
5,6-Dihydroxy-7,8,3',4'-tetramethoxyflavone	Flavonoids	1	1	1899330	116158	820599	813799		182934	177055	348202	326774	371262	760420		5,6-Dihydroxy-7,8,3',4'-tetramethoxyflavone [ C19 H18 O8, tgt=58.49, overall=58.49 ]	(375.43497, 315.23666)(358.29517, 707.76605)(377.1136, 105.18)(359.5225, 6341.606)(360.10803, 767.054)(392.13312, 18877.281)(393.13498, 2486.258)(374.55453, 1247.3787)(375.1203, 3370.57)(400.0939, 211.22333)(382.5882, 7190.627)(384.09604, 1908.6549)
Peonidin	Flavonoids	645319	620319	3592400	3760347	766430	758187		4228018	4146074	5761284	5658439	4187242	768304		Peonidin [ C16 H13 O6, tgt=64.25, overall=64.25 ]	(303.21115, 5335.029)(285.06415, 626.71)(306.4748, 3902.5625)(289.08472, 14099.071)(321.1098, 47711.098)(322.32367, 4102.4443)(323.71844, 3293.066)(303.0996, 21371.96)(304.1024, 4943.05)(307.0558, 232.97)
Delphinidin 3-O-arabinoside	Flavonoids	1	1	1	1	1	1		743405	736680	839223	570831	1	1		Delphinidin 3-O-arabinoside [ C20 H19 O11]	(436.42502, 14705.388)(436.08972, 3164.37)(441.10895, 49563.17)(421.1032, 2027.84)(453.12912, 24785.365)(454.1319, 4281.1226)(455.1308, 685.3025)(435.11884, 23568.752)(436.12152, 2789.8782)(461.09253, 967.45996)(441.08, 10903.323)(442.0821, 2121.2998)(443.07944, 616.0933)
Dihydroquercetin 3-O-rhamnoside	Flavonoids	1	1	1	1	1	1		70799	1	1132499	1	1	1		Dihydroquercetin 3-O-rhamnoside [ C21 H22 O11]	(453.1255, 3180.9297)(433.91025, 67179.75)(434.10806, 17232.994)(435.11096, 2961.4)(456.1345, 6139.065)(433.1073, 244374.16)(434.1099, 42249.883)(435.11157, 5418.745)(468.293, 16401.344)(469.1504, 10879.77)(470.1521, 373.51)(453.34775, 2261.246)(456.1582, 469.39)(475.1149, 4314.06)(457.90106, 78794.24)(456.09155, 34098.16)(457.09338, 4319.1797)
8-Prenylnaringenin	Flavonoids	1344108	1333277	6606715	6526107	5008332	4915142		6809431	6796723	1960719	12386957	4993002	4799719		8-Prenylnaringenin [ C20 H20 O5, tgt=58.70, overall=58.70 ]	(324.9285, 14640.247)(366.84308, 35411.504)(368.1329, 14939.109)(325.99228, 530847.25)(327.3525, 365957.22)(327.99634, 79398.695)(361.1758, 7151.227)(362.17975, 3871.3213)(363.1792, 542.43335)(345.1451, 5937.36)(345.17328, 39743.332)(346.1138, 2095.2524)(343.24866, 1364.6433)
(-)-Epicatechin-(2a-7)(4a-8)-epicatechin 3-O-galactoside	Flavonoids	1	1	1	1	1	1		1	1	235984	226250	1	1		(-)-Epicatechin-(2a-7)(4a-8)-epicatechin 3-O-galactoside [ C36 H34 O17 ]	(745.2134, 841.73)(739.1994, 8044.685)(740.20215, 802.79004)
Cyanidin 3-O-glucoside	Flavonoids	1	1	234496	169396	1	1		570095	568934	6385685	822015	1	1		Cyanidin 3-O-glucoside [ C21 H21 O11, tgt= ]	(452.1126, 19551.19)(450.1038, 4925.33)(431.09888, 7136.3047)(453.62677, 3456.2324)(455.127, 400.85)(435.1192, 1761.11)(467.1446, 44341.98)(468.14755, 8972.528)(469.1504, 10154.45)(470.1521, 348.61)(452.56967, 5044.6)(450.137, 2706.49)(477.10663, 415.98)(455.0954, 338.73)
Delphinidin 3-O-rutinoside	Flavonoids	10464940	11584626	9872346	9071086	8040755	7696282		13137226	14920644	366332	14692714	9522084	12138826		Delphinidin 3-O-rutinoside [ C27 H31 O16, tgt=45.67, overall=45.67 ]	(612.1725, 99827.84)(613.1718, 30928.39)(614.1696, 8995.27)(615.1662, 1516.28)(595.1559, 2941.2576)(612.17474, 119981.516)(613.174, 38413.45)(611.177, 161433.77)(612.1824, 837.3)(616.6684, 26520.625)(617.93835, 8171.7686)(619.1453, 1391.5084)
Malvidin 3,5-O-diglucoside	Flavonoids	1	1	463747	1	1	1		1	129186	1671247	1625034	1	1		Malvidin 3,5-O-diglucoside [ C29 H35 O17, tgt= ]	(637.9817, 23213.195)(638.18243, 5827.3286)(639.1807, 2689.0474)(641.1889, 1082.1825)(643.2031, 2048.785)
6''-O-Malonylglycitin	Flavonoids	1	1	1	1	1	1		1	1	141757	132141	1	1		6''-O-Malonylglycitin [ C25 H24 O13, tgt= ]	(551.15625, 11254.01)(552.15894, 1012.265)
(-)-Epigallocatechin	Flavonoids	386181	955646	1720668	1770151	1213886	1544217		1420913	1406193	476205	598662	1214980	1266056		(-)-Epigallocatechin [ C15 H14 O7, tgt=49.98, overall=49.98 ]	(306.6015, 124083.34)(308.07755, 27411.93)(309.0782, 6077.5273)(292.07462, 3293.843)(291.0699, 6102.72)(308.5869, 4707.7603)(291.0782, 21787.13)(292.0825, 1690.1067)(293.07742, 1255.9271)(324.77444, 30634.004)(325.51624, 8028.382)(328.1208, 1672.63)(307.0974, 432.035)(331.0717, 935.51)(316.0647, 293.825)
Butein	Flavonoids	1031291	229311	1443794	1374973	157519	161176		1045090	1064284	842781	846420	1309520	151950		Butein [ C15 H12 O5, tgt=67.70, overall=67.70 ]	(276.3312, 14418.819)(274.0755, 2323.68)(258.62677, 12180.657)(259.0745, 22858.7)(274.6361, 25043.977)(275.85995, 3528.3223)(256.26953, 21399.85)(256.06903, 5966.344)(291.60498, 30814.004)(292.1081, 4051.29)(274.29816, 4773.1377)(276.1057, 29722.688)(295.63174, 9124.915)(280.14484, 1442.9691)(281.0545, 1703.63)
Kaempferol 3-O-rhamnosyl-rhamnosyl-glucoside	Flavonoids	1	1	762716	765237	606390	602847		362749	369521	112914	116186	616334	563622		Kaempferol 3-O-rhamnosyl-rhamnosyl-glucoside [ C33 H40 O19, tgt=16.53, overall=16.53 ]	(723.2078, 7667.78)(724.2055, 1264.8365)(740.24915, 15265.945)(741.25085, 1626.4775)(767.22186, 16656.146)(768.2242, 3801.5647)(769.2246, 471.13)
Apigenin 7-O-glucoside	Flavonoids	92631	93722	172351	164297	136529	138137		167730	157967	298296	298760	146045	130016		Apigenin 7-O-glucoside [ C21 H20 O10, tgt=52.43, overall=52.43 ]	(433.10538, 131312.83)(434.10797, 21300.26)(435.11124, 4190.0728)(415.89883, 1520.8679)(419.11456, 2071.205)(455.15128, 1258.35)(434.1346, 9817.253)(433.12274, 810.695)(456.36523, 36719.895)(456.09155, 34098.16)(457.09338, 4319.1797)(437.94806, 7319.81)(442.0972, 2505.78)
Kaempferol 3-O-sophoroside	Flavonoids	18949792	20720822	17804492	16652671	15097705	14193846		23674828	26472888	24311160	25598548	17411848	21522280		Kaempferol 3-O-sophoroside [ C27 H30 O16, tgt=54.35, overall=54.35 ]	(611.1511, 41391.773)(612.15356, 8718.47)(613.1554, 401.39502)(613.1285, 40488.113)(614.1263, 12245.963)(614.1696, 8495.54)(610.17615, 308310.28)(611.17664, 169018.27)(633.1338, 517915.5)(634.13696, 142259.44)(635.1386, 26588.637)(636.1399, 2735.41)(615.1298, 4931.5903)(617.12787, 537.0688)
Pinocembrin	Flavonoids	14098126	13775825	34646448	35530076	24228674	24215572		21344370	21671004	12176470	12714459	26434256	26220844		Pinocembrin [ C15 H12 O4, tgt=84.12, overall=84.12 ]	(258.08163, 19125.06)(240.40294, 1711.0934)(259.7545, 15193.559)(262.0943, 1172.276)(243.0838, 823.755)(275.6807, 197962.7)(276.86337, 20819.9)(278.72083, 1137.02)(256.7365, 5224.361)(280.49304, 581.62146)(261.138, 250633.95)(262.14764, 29180.63)
Geraldone	Flavonoids	81706	568594	809283	796119	499545	821942		789687	761458	296852	1077557	487985	489633		Geraldone [ C16 H12 O5, tgt=60.85, overall=60.85 ]	(288.5266, 1586.2021)(271.07022, 2431.934)(289.08502, 62743.688)(290.08777, 5606.11)(270.0743, 1157.61)(305.1132, 3484.212)(307.11646, 857.74)(284.29413, 42469.17)(285.3467, 4216.804)(286.59375, 1675.24)(308.39572, 1375.9901)(290.8701, 34891.652)(291.0515, 6630.97)
Pelargonidin	Flavonoids	274036	348712	860931	889711	273120	1915377		688775	686848	1375921	1323829	1864931	265032		Pelargonidin [ C15 H11 O5, tgt=70.34, overall=70.34 ]	(275.06827, 2534.5723)(257.05978, 7112.0757)(277.08414, 14696.778)(259.0729, 6324.2866)(291.0997, 20094.037)(292.1027, 2142.6316)(273.09033, 35496.465)(274.093, 3286.7012)(297.05972, 3223.4915)(298.0597, 299.57)(277.04605, 851.775)
Quercetin 3-O-rutinoside	Flavonoids	18949792	20720822	17804492	16652671	15097705	14193846		23674828	26472888	24311160	25598548	17411848	21522280		Quercetin 3-O-rutinoside [ C27 H30 O16, tgt=54.35, overall=54.35 ]	(611.1511, 41391.773)(612.15356, 8718.47)(613.1554, 401.39502)(613.1285, 40488.113)(614.1263, 12245.963)(614.1696, 8495.54)(610.17615, 308310.28)(611.17664, 169018.27)(633.1338, 517915.5)(634.13696, 142259.44)(635.1386, 26588.637)(636.1399, 2735.41)(615.1298, 4931.5903)(617.12787, 537.0688)
Kaempferol 3-O-glucoside	Flavonoids	249789	249370	230675	215000	1	1		1	334054	473790	456560	1	1		Kaempferol 3-O-glucoside [ C21 H20 O11, tgt=36.06, overall=36.06 ]	(449.67545, 14404.745)(450.10327, 4019.9666)(431.08878, 6137.4097)(453.11728, 19191.182)(450.1039, 6817.37)(468.59836, 9420.02)(470.47888, 17081.916)(471.6476, 3444.2825)(472.1489, 365.45)(450.12836, 344.56)(471.08356, 275918.2)(472.08624, 51303.4)(473.08777, 6772.8047)
Glycitin	Flavonoids	423790	439226	151808	1583263	1774159	1788554		718259	712185	688030	679357	1719825	2990782		Glycitin [ C22 H22 O10, tgt=64.02, overall=64.02 ]	(429.3967, 48380.598)(430.11255, 8263.57)(431.11386, 776.26245)(471.7878, 3098.786)(472.12125, 1236.8401)(431.12427, 24620.86)(432.12695, 2746.914)(433.13403, 2786.38)(464.62466, 4424.024)(465.9563, 960.3981)(449.1342, 851.02)(446.57596, 5556.413)(447.14365, 970.7375)
Eriocitrin	Flavonoids	664382	3800448	909567	941371	545019	532354		771226	790833	1104911	1079972	558687	525001		Eriocitrin [ C27 H32 O15, tgt=52.50, overall=52.50 ]	(579.1708, 4742.255)(580.1728, 276.39)(603.1958, 65032.375)(579.17474, 22138.225)(580.17725, 4006.5278)(581.1754, 1692.6029)(615.2149, 8244.093)(616.2174, 1183.6951)(621.8372, 5556.257)(620.17236, 968.088)(621.172, 402.49)(605.5274, 1315.22)
6-Hydroxyluteolin 7-O-rhamnoside	Flavonoids	249789	249370	230675	215000	2622886	283404		1	334054	473790	456560	283713	2489119		6-Hydroxyluteolin 7-O-rhamnoside [ C21 H20 O11, tgt=36.06, overall=36.06 ]	(449.50284, 10897.802)(450.10327, 4019.9666)(431.0887, 6017.1465)(453.11728, 19191.182)(450.1039, 6817.37)(468.6817, 8908.317)(470.3949, 12968.934)(471.48074, 2940.655)(472.1489, 365.45)(450.12836, 344.56)(471.08344, 208398.22)(472.0861, 36744.01)(473.0877, 4784.0)
Apigenin 7-O-(6''-malonyl-apiosyl-glucoside)	Flavonoids	134801	164628	449202	72195	72927	69867		455693	82662	595944	564775	620499	80787		Apigenin 7-O-(6''-malonyl-apiosyl-glucoside) [ C29 H30 O17, tgt=46.29, overall=46.29 ]	(633.13727, 102311.164)(634.1387, 28542.156)(635.13904, 6729.0293)(636.1395, 2481.4102)
Cyanidin 3-O-sambubioside	Flavonoids	1	1	109692	102361	1	95658		201786	1	233742	202581	96147	97400		Cyanidin 3-O-sambubioside [ C26 H29 O15, tgt=42.97, overall=42.97 ]	(585.16864, 1848.035)(564.47906, 4191.0034)(585.16925, 29302.613)(586.17236, 10470.061)(587.17346, 1552.7151)(565.1459, 6238.4673)(566.14874, 659.055)(603.19543, 153424.0)(604.1998, 97746.625)(605.20154, 20463.562)(582.6818, 6321.077)(584.1869, 620.0867)(587.127, 3095.7175)
Delphinidin 3-O-glucosyl-glucoside	Flavonoids	118006	136636	378684	350453	577706	561966		377750	361014	490970	476736	535769	521190		Delphinidin 3-O-glucosyl-glucoside [ C27 H31 O17, tgt=59.81, overall=59.81 ]	(611.1502, 5144.6978)(612.1545, 3943.4448)(628.1841, 1737.2161)(629.1844, 1144.7151)(633.13654, 33920.035)(634.138, 8828.085)(635.139, 3072.277)(636.13824, 844.8733)
Cyanidin 3-O-(6''-p-coumaroyl-glucoside)	Flavonoids	733189	857710	688198	644176	573190	542732		964712	1102308	1042443	1110696	681848	902958		Cyanidin 3-O-(6''-p-coumaroyl-glucoside) [ C30 H27 O13, tgt=41.28, overall=41.28 ]	(613.174, 42059.168)(614.1717, 12874.263)(615.1679, 2499.7317)
Naringenin 7-O-glucoside	Flavonoids	3430208	3471961	2876605	2960120	5717777	5597214		2054914	2027850	947901	973049	3694823	3554187		Naringenin 7-O-glucoside [ C21 H22 O10, tgt=78.60, overall=78.60 ]	(417.77682, 3391.212)(440.1428, 69561.65)(439.80826, 32691.193)(439.13806, 17189.045)(440.1481, 4192.0)(452.15225, 3316.75)(434.73355, 81885.57)(436.14966, 16870.457)(437.14926, 2049.9438)(458.44897, 3650.57)(460.1216, 176.76)(441.10803, 445.75)
Malvidin 3-O-(6''-p-coumaroyl-glucoside)	Flavonoids	807087	1008150	1	379544	1	1		761623	1005925	1400632	1548631	312822	466127		Malvidin 3-O-(6''-p-coumaroyl-glucoside) [ C32 H31 O14, tgt=40.56, overall=40.56 ]	(640.20447, 17047.936)(641.20374, 4689.676)(642.202, 1016.9477)
Rhoifolin 4'-O-glucoside	Flavonoids	1	1	762716	765237	606390	602847		362749	369521	112914	116186	616334	563622		Rhoifolin 4'-O-glucoside [ C33 H40 O19, tgt=16.53, overall=16.53 ]	(723.2078, 7667.78)(724.2055, 1264.8365)(740.24915, 15265.945)(741.25085, 1626.4775)(767.22186, 16656.146)(768.2242, 3801.5647)(769.2246, 471.13)
Hesperetin	Flavonoids	1759035	1853247	1346941	1344261	2577989	7008414		4339965	4294052	1985952	2060212	6510302	7170675		Hesperetin [ C16 H14 O6, tgt=65.36, overall=65.36 ]	(303.0801, 13970.366)(304.08264, 2108.22)(305.08755, 6763.67)(306.093, 192.44)(289.0846, 9259.478)(305.19995, 4901.17)(289.0854, 27183.748)(290.08676, 1960.0133)(322.979, 1951.8073)(323.11768, 540.79504)(324.12268, 973.845)(304.35718, 5220.0728)(307.1164, 158.84)(310.6234, 48837.996)(312.07172, 4416.6304)
Apigenin 7-O-glucuronide	Flavonoids	1	1	1	1	1	1		1	1	121686	1	1	1		Apigenin 7-O-glucuronide [ C21 H18 O11, tgt= ]	(429.0832, 1592.34)(430.0809, 430.85)
Chrysoeriol 7-O-apiosyl-glucoside	Flavonoids	1	1	1	1	1	1		1	1	7387521	7224469	1	1		Chrysoeriol 7-O-apiosyl-glucoside [ C27 H30 O15, tgt= ]	(601.18115, 310.435)(581.1709, 432.45502)(595.91876, 13572.916)(596.1927, 1752.2657)
Cyanidin 3-O-(6''-caffeoyl-glucoside)	Flavonoids	6079297	6346013	7100254	5051516	4418913	4235227		7198000	8099982	7722259	9454248	5204429	6702449		Cyanidin 3-O-(6''-caffeoyl-glucoside) [ C30 H27 O14, tgt=52.25, overall=52.25 ]	(615.165, 627.31)(612.17456, 123211.5)(613.17395, 39381.9)(614.17163, 11886.338)(615.1681, 2405.0916)(617.1267, 5458.9844)(618.1201, 9481.865)(619.1219, 645.62)
Kaempferol 3-O-galactoside 7-O-rhamnoside	Flavonoids	1	1	1	1	1	1		1	1	7387521	7224469	1	1		Kaempferol 3-O-galactoside 7-O-rhamnoside [ C27 H30 O15, tgt= ]	(601.18115, 310.435)(581.1709, 432.45502)(595.91876, 13572.916)(596.1927, 1752.2657)
Cyanidin	Flavonoids	479568	1	120020	128482	115408	123219		283058	1	181016	654268	117864	124708		Cyanidin [ C15 H11 O6, tgt=47.24, overall=47.24 ]	(289.0588, 4001.04)(271.0504, 339.84)(293.07797, 929.6733)(275.06854, 2075.0842)(305.80737, 5713.013)(306.59393, 754.43)(289.08472, 13275.184)(290.08792, 1291.6837)(291.0863, 663.87)(314.0518, 555.29)
Cyanidin 3-O-rutinoside	Flavonoids	438747	475380	907698	910943	813709	1		1	1	9789137	9579172	1	764028		Cyanidin 3-O-rutinoside [ C27 H31 O15, tgt=40.93, overall=40.93 ]	(601.18115, 310.435)(580.04913, 14671.311)(580.84436, 3843.4968)(581.57666, 1306.142)(613.20715, 4023.2852)(614.2174, 505.51)(595.858, 14251.903)(596.1927, 1882.9371)(621.1699, 1847.95)
Dihydroquercetin	Flavonoids	1	1	843616	819636	414043	410188		670820	1	468271	441082	455443	346546		Dihydroquercetin [ C15 H12 O7, tgt=59.98, overall=59.98 ]	(305.0577, 2274.415)(286.47787, 25854.254)(287.4814, 2124.539)(307.075, 9283.011)(322.09048, 1400.37)(307.2929, 1476.9641)
3-Methoxynobiletin	Flavonoids	1	1315665	2238036	1485622	1008417	1997786		1639251	1358767	6988124	7045821	967478	1		3-Methoxynobiletin [ C22 H24 O9, tgt=57.40, overall=57.40 ]	(433.34125, 7062.2095)(434.2862, 881.9171)(414.8819, 38597.133)(416.1334, 6979.1465)(417.13806, 7750.4565)(418.1394, 1390.49)(435.1549, 3519.87)(415.80765, 23053.322)(416.8082, 2548.947)(450.17432, 16770.314)(451.17422, 2110.4302)(433.5013, 3603.0586)(434.95105, 807.2867)(456.46533, 3119.0881)(441.13052, 1340.8666)
Quercetin 3-O-glucuronide	Flavonoids	353358	361818	854498	823426	1359163	1332392		89426	81123	295796	286223	1139499	1081170		Quercetin 3-O-glucuronide [ C21 H18 O13, tgt=43.01, overall=43.01 ]	(479.07413, 30205.4)(480.077, 4351.601)(481.0923, 1591.985)(501.12772, 16274.698)(502.1308, 3156.31)(483.1176, 12750.04)(503.06244, 5972.335)
Cyanidin 3-O-(6''-malonyl-glucoside)	Flavonoids	1	1	1	1	1	1		85225	1	138293	130560	1	1		Cyanidin 3-O-(6''-malonyl-glucoside) [ C24 H23 O14, tgt=42.32, overall=42.32 ]	(538.1155, 673.87)(523.1179, 1448.5636)(537.1334, 10239.708)(539.14716, 3682.6465)(539.1478, 2228.055)
Luteolin 7-O-rutinoside	Flavonoids	1	1	1	1	1	1		1	1	7387521	7224469	1	1		Luteolin 7-O-rutinoside [ C27 H30 O15, tgt= ]	(601.18115, 310.435)(581.1709, 432.45502)(595.91876, 13572.916)(596.1927, 1752.2657)
Pebrellin	Flavonoids	1679318	1	2386861	8212049	1130430	1130229		1348845	430141	2311570	1788651	6505314	6351650		Pebrellin [ C18 H16 O7, tgt=56.34, overall=56.34 ]	(345.72775, 14684.272)(346.34235, 3080.6125)(330.58978, 1040.675)(349.1084, 1089.842)(329.59442, 2072.065)(331.0931, 6488.47)(363.7932, 2170.9333)(363.1184, 106.01)(346.72104, 26175.596)(347.67957, 5032.1606)(347.1255, 5094.89)(353.07843, 24066.973)(354.08093, 3809.1384)
Kaempferol 3-O-rutinoside	Flavonoids	1	1	1	1	1	1		1	1	7387521	7224469	1	1		Kaempferol 3-O-rutinoside [ C27 H30 O15, tgt= ]	(601.18115, 310.435)(581.1709, 432.45502)(595.91876, 13572.916)(596.1927, 1752.2657)
Kaempferol 3-O-rhamnoside	Flavonoids	92631	93722	126267	164297	136529	138137		167730	157967	298296	298760	146045	130016		Kaempferol 3-O-rhamnoside [ C21 H20 O10, tgt=52.43, overall=52.43 ]	(433.10538, 131312.83)(434.10797, 21300.26)(435.11124, 4190.0728)(415.89883, 1520.8679)(419.11456, 2071.205)(455.15128, 1258.35)(434.4692, 11357.981)(433.12274, 810.695)(456.42593, 33817.508)(456.09155, 34098.16)(457.09338, 4319.1797)(437.94806, 7605.077)(442.0972, 2505.78)
Kaempferol 3-O-(6''-acetyl-galactoside) 7-O-rhamnoside	Flavonoids	176075	201642	423478	448501	142300	146146		734025	730202	826224	784678	161234	156836		Kaempferol 3-O-(6''-acetyl-galactoside) 7-O-rhamnoside [ C29 H32 O16, tgt=41.54, overall=41.54 ]	(637.17993, 43577.23)(638.18243, 9093.577)(639.1807, 2689.0474)(619.1713, 25314.367)(620.1728, 5079.86)(621.17035, 2828.6985)(640.1016, 17269.37)(639.2066, 21273.037)(640.2045, 14286.662)(641.204, 5091.146)(642.2023, 974.3467)(665.1644, 2818.67)
Quercetin	Flavonoids	2305913	2141838	2008616	177742	279504	2039418		194888	2258407	285552	2926288	263859	259315		Quercetin [ C15 H10 O7, tgt=56.54, overall=56.54 ]	(303.04526, 49788.01)(304.04816, 5011.9697)(305.05005, 977.675)(284.7846, 27964.959)(285.03387, 6252.608)(305.05716, 4247.5835)(286.54205, 14090.074)(324.091, 1505.42)(325.0855, 922.06)(302.0678, 387.91)(327.0392, 438.78)
Kaempferol 3-O-(2''-rhamnosyl-galactoside) 7-O-rhamnoside	Flavonoids	1	1	762716	765237	606390	602847		362749	369521	112914	116186	616334	563622		Kaempferol 3-O-(2''-rhamnosyl-galactoside) 7-O-rhamnoside [ C33 H40 O19, tgt=16.53, overall=16.53 ]	(723.2078, 7667.78)(724.2055, 1264.8365)(740.24915, 15265.945)(741.25085, 1626.4775)(767.22186, 16656.146)(768.2242, 3801.5647)(769.2246, 471.13)
7,3',4'-Trihydroxyflavone	Flavonoids	3208222	2882353	4486899	4516886	4377008	4264019		1428987	1438619	268555	267569	4052571	4089228		7,3',4'-Trihydroxyflavone [ C15 H10 O5, tgt=67.89, overall=67.89 ]	(271.06104, 2871.08)(256.89294, 13216.719)(257.89502, 3221.8877)(270.27792, 1742.3949)(275.03336, 79665.484)(276.03604, 3166.908)(277.03217, 134.59)
(+)-Gallocatechin	Flavonoids	386181	955646	1720668	1770151	1213886	1544217		1420913	1406193	476205	598662	1214980	1266056		(+)-Gallocatechin [ C15 H14 O7, tgt=49.98, overall=49.98 ]	(306.6015, 124083.34)(308.07755, 27411.93)(309.0782, 6077.5273)(292.07462, 3293.843)(291.0699, 6102.72)(308.5869, 4707.7603)(291.0782, 21787.13)(292.0825, 1690.1067)(293.07742, 1255.9271)(324.77444, 30634.004)(325.51624, 8028.382)(328.1208, 1672.63)(307.0974, 432.035)(331.0717, 935.51)(316.0647, 293.825)
Narirutin	Flavonoids	20280570	21461356	28961038	29231356	23296984	23337464		25797156	16996116	26010140	821736	23734184	22951240		Narirutin [ C27 H32 O14, tgt=54.24, overall=54.24 ]	(580.3919, 5810.829)(581.1754, 2227.0527)(585.2054, 205.08)(569.1885, 2418.77)(607.37024, 4689.0635)(607.18054, 2498.948)(608.1859, 1133.605)(609.1843, 2256.3052)(587.1638, 10579.82)(588.16614, 2168.81)
Kaempferol 7-O-glucoside	Flavonoids	249789	249370	230675	215000	2622886	283404		1	334054	473790	456560	283713	2489119		Kaempferol 7-O-glucoside [ C21 H20 O11, tgt=36.06, overall=36.06 ]	(449.50284, 10897.802)(450.10327, 4019.9666)(431.0887, 6017.1465)(453.11728, 19191.182)(450.1039, 6817.37)(468.6817, 8908.317)(470.3949, 12968.934)(471.48074, 2940.655)(472.1489, 365.45)(450.12836, 344.56)(471.08344, 208398.22)(472.0861, 36744.01)(473.0877, 4784.0)
Quercetin 7,4'-O-diglucoside	Flavonoids	4871103	5122900	1659923	1544458	1721540	1677891		1877173	1818483	2312478	2231991	1721942	1638533		Quercetin 7,4'-O-diglucoside [ C27 H30 O12, tgt=68.63, overall=68.63 ]	(530.839, 2128.1233)(531.1735, 3224.65)(549.1859, 114469.81)(550.1886, 23271.295)(551.1905, 2869.8247)(564.20447, 59868.28)(565.2045, 9474.765)(566.20856, 2742.6873)(555.1602, 87174.36)(556.1629, 16769.781)(557.1646, 4021.3015)
Cyanidin 3-O-galactoside	Flavonoids	1	1	234496	169396	1	1		570095	568934	6385685	822015	1	1		Cyanidin 3-O-galactoside [ C21 H21 O11, tgt= ]	(452.1126, 19551.19)(450.1038, 4925.33)(431.09888, 7136.3047)(453.62677, 3456.2324)(455.127, 400.85)(435.1192, 1761.11)(467.1446, 44341.98)(468.14755, 8972.528)(469.1504, 10154.45)(470.1521, 348.61)(452.56967, 5044.6)(450.137, 2706.49)(477.10663, 415.98)(455.0954, 338.73)
Apigenin	Flavonoids	3208222	2882353	4486899	4516886	4377008	4264019		1428987	1438619	268555	267569	4052571	4089228		Apigenin [ C15 H10 O5, tgt=67.89, overall=67.89 ]	(271.06104, 2871.08)(256.89294, 13216.719)(257.89502, 3221.8877)(270.27792, 1742.3949)(275.03336, 79665.484)(276.03604, 3166.908)(277.03217, 134.59)
Xanthohumol	Flavonoids	22511436	22656664	38294000	2093186	48059432	48116344		2094963	2051524	36520892	35633016	47105596	46558632		Xanthohumol [ C21 H22 O5, tgt=60.94, overall=60.94 ]	(381.14618, 82375.27)(382.14896, 11433.399)(341.1511, 41357.977)(342.1532, 5845.845)(359.16052, 6924.373)(375.7728, 1508.9135)(376.1899, 282.4)(363.1356, 2922.75)(364.1385, 196.48)(356.6501, 388707.9)(357.43008, 118443.33)(357.1734, 42795.035)
Cyanidin 3-O-(6''-acetyl-glucoside)	Flavonoids	130421	1	282705	1	1	1		1	1	688458	638368	1	1		Cyanidin 3-O-(6''-acetyl-glucoside) [ C23 H23 O12, tgt=11.66, overall=11.66 ]	(493.1255, 3911.9934)(493.1296, 4514.75)(477.1243, 3409.0874)(476.1176, 284.5)(509.15466, 32185.244)(510.1571, 4977.015)(491.14426, 10947.15)(492.1473, 1291.385)(517.1222, 1131.98)(500.11047, 702.32)
Chrysoeriol 7-O-(6''-malonyl-glucoside)	Flavonoids	1	1	280171	277373	227898	217790		1	1	184584	175520	205578	199949		Chrysoeriol 7-O-(6''-malonyl-glucoside) [ C25 H24 O14, tgt= ]	(531.10223, 15418.841)(532.1048, 2360.5085)(537.1337, 7782.63)(555.1073, 6474.2197)(554.106, 1256.225)
Pelargonidin 3-O-glucosyl-rutinoside	Flavonoids	1	1	1	129402	1	89321		226979	218761	1190252	769422	1	79451		Pelargonidin 3-O-glucosyl-rutinoside [ C33 H41 O19, tgt= ]	(723.21436, 5211.96)(724.2093, 375.90002)(743.91144, 5866.14)(744.24365, 3536.75)(745.2432, 911.935)(724.98035, 16305.4375)(726.2332, 5072.68)(727.2361, 1252.34)(765.28046, 733.64)(743.2426, 6555.9)(744.2451, 2292.43)(767.22284, 13385.536)(768.22516, 3023.86)(769.2252, 412.91498)
Kaempferol 3-O-glucuronide	Flavonoids	248373	259190	365445	350653	1848750	1837053		225221	226947	1298179	1297382	1597386	1541678		Kaempferol 3-O-glucuronide [ C21 H18 O12, tgt=35.70, overall=35.70 ]	(463.07935, 28213.053)(464.08212, 3782.384)(465.08447, 668.85004)(463.08026, 70162.84)(464.0829, 10310.67)(465.08505, 868.69)(483.12808, 802.4325)(485.13342, 5611.1953)(486.1358, 1134.235)(485.06183, 69631.65)(486.0642, 10444.811)(487.065, 1405.51)
Rhamnetin	Flavonoids	1576650	1534509	1232879	1303283	1	1044162		439547	427213	595631	576634	895113	950594		Rhamnetin [ C16 H27 O7, tgt=57.55, overall=57.55 ]	(332.18564, 7327.8213)(350.27713, 15306.963)(350.21094, 2877.5486)(333.36176, 20710.68)(335.01285, 1268.395)(355.16708, 830240.75)(356.1707, 190491.31)(357.17383, 27030.795)(358.17468, 3241.8)(337.15625, 8951.733)
Sinensetin	Flavonoids	1	1	1	1	29212140	1		1	1	1265465	44141464	29183068	1		Sinensetin [ C20H20O7, tgt= ]	(374.98773, 7065.5356)(374.12463, 358.2)(359.1243, 711.0029)(376.47168, 6530.7637)(377.80746, 984.37994)(359.1251, 1278.96)(391.03528, 4455.581)(391.82065, 3964.6267)(373.48328, 15199.002)(374.64786, 2227.1902)(398.8354, 17138.857)(399.83835, 2427.5188)(399.1205, 469.7)(381.10928, 20794.34)(382.11197, 2521.23)
Quercetin 3-O-arabinoside	Flavonoids	1	149173	126327	118094	1	1		1	91005	205509	191358	1	1		Quercetin 3-O-arabinoside [ C20 H18 O11, tgt=29.26, overall=29.26 ]	(435.9784, 4395.01)(436.80362, 3767.507)(455.12466, 46581.51)(456.03534, 17684.42)(456.98453, 7432.0386)(457.6277, 9007.055)(458.129, 1500.49)(436.2547, 20776.014)(435.11124, 4190.0728)(461.091, 728.5)(443.07944, 607.92334)
Daidzin	Flavonoids	1087505	1078354	1107868	1096087	1485358	1468304		665322	640136	2558565	558774	1457487	1423987		Daidzin [ C21 H20 O9, tgt=79.68, overall=79.68 ]	(417.60992, 1869.1001)(419.1149, 1279.67)(399.1005, 1771.57)(399.10916, 4449.346)(434.2542, 6472.6445)(436.1496, 4765.75)(417.67242, 60462.87)(418.44852, 8454.681)(419.13953, 959.19495)(441.10867, 16355.862)(442.1112, 2388.2732)(443.1108, 1025.9017)(423.09848, 2024.75)
Luteolin 7-O-(2-apiosyl-6-malonyl)-glucoside	Flavonoids	905402	2148656	4281125	3062124	3868829	3277047		3833668	784335	1258939	2536392	957669	3638556		Luteolin 7-O-(2-apiosyl-6-malonyl)-glucoside [ C29 H30 O18, tgt=33.35, overall=33.35 ]	(649.12836, 57125.15)(650.1308, 11546.27)(651.1315, 1500.46)(686.1915, 35678.09)(687.1908, 11777.86)(688.18884, 3667.9668)
Narirutin 4'-O-glucoside	Flavonoids	111223	114905	298281	314403	200788	215917		279132	261653	1495347	1464584	204092	187457		Narirutin 4'-O-glucoside [ C33 H42 O19, tgt=44.89, overall=44.89 ]	(743.2414, 6857.7217)(744.2437, 2718.92)(745.24274, 806.8675)(725.2303, 25875.227)(726.23303, 6537.0547)(727.23566, 1350.315)(767.2264, 11695.138)(768.2256, 3406.2227)(769.2285, 291.23)(751.887, 2274.03)(751.22644, 2083.68)
Naringenin	Flavonoids	1031291	229311	1443794	1374973	157519	161176		1045090	1064284	842781	846420	1309520	151950		Naringenin [ C15 H12 O5, tgt=67.70, overall=67.70 ]	(276.3312, 14418.819)(274.0755, 2323.68)(258.62677, 12180.657)(259.0745, 22858.7)(274.6361, 25043.977)(275.85995, 3528.3223)(256.26953, 21399.85)(256.06903, 5966.344)(291.60498, 30814.004)(292.1081, 4051.29)(274.29816, 4773.1377)(276.1057, 29722.688)(295.63174, 9124.915)(280.14484, 1442.9691)(281.0545, 1703.63)
Delphinidin 3-O-(6''-p-coumaroyl-glucoside)	Flavonoids	6079297	6346013	7100254	5051516	4418913	4235227		7198000	8099982	7722259	9454248	5204429	6702449		Delphinidin 3-O-(6''-p-coumaroyl-glucoside) [ C30 H27 O14, tgt=52.25, overall=52.25 ]	(615.165, 627.31)(612.17456, 123211.5)(613.17395, 39381.9)(614.17163, 11886.338)(615.1681, 2405.0916)(617.1267, 5458.9844)(618.1201, 9481.865)(619.1219, 645.62)
Myricetin	Flavonoids	139409	156944	1059101	461652	175543	159163		2035932	2001845	144981	139924	153779	189857		Myricetin [ C15 H10 O8, tgt=50.42, overall=50.42 ]	(343.03424, 26953.785)(344.03775, 2013.3232)(303.0394, 3460.31)(319.03726, 59109.668)(320.03998, 5532.892)(321.0415, 299.81)(336.3225, 5804.1523)(321.05313, 167784.06)(322.05585, 25894.379)(323.05704, 2749.2878)(325.01758, 620.1066)(321.0663, 12445.643)(321.0695, 7799.33)
Phloretin 2'-O-xylosyl-glucoside	Flavonoids	468376	493154	863616	874769	432926	438384		1056411	1019473	2330843	3690734	418302	1		Phloretin 2'-O-xylosyl-glucoside [ C26 H32 O14, tgt=65.25, overall=65.25 ]	(571.85126, 9695.145)(573.4382, 6900.671)(573.6885, 14157.12)(574.1906, 4617.0303)(573.1957, 10066.32)(572.5936, 146849.81)(573.5934, 52055.35)(574.1914, 4298.205)(569.2066, 1221.45)(575.3556, 7218.3354)(577.09766, 1925.3944)(577.1771, 1138.4751)(579.1698, 5113.455)
Kaempferol 3-O-galactoside	Flavonoids	249789	249370	230675	215000	2622886	283404		1	334054	473790	456560	283713	2489119		Kaempferol 3-O-galactoside [ C21 H20 O11, tgt=36.06, overall=36.06 ]	(449.50284, 10897.802)(450.10327, 4019.9666)(431.0887, 6017.1465)(453.11728, 19191.182)(450.1039, 6817.37)(468.6817, 8908.317)(470.3949, 12968.934)(471.48074, 2940.655)(472.1489, 365.45)(450.12836, 344.56)(471.08344, 208398.22)(472.0861, 36744.01)(473.0877, 4784.0)
Malvidin 3-O-arabinoside	Flavonoids	342569	343767	391026	387332	333735	306549		569204	565133	3553567	3158254	209681	290506		Malvidin 3-O-arabinoside [ C22 H23 O11, tgt=62.48, overall=62.48 ]	(467.129, 2248.655)(469.1322, 27872.35)(447.1244, 359.55)(467.1441, 2979.6152)(468.1468, 1113.35)(448.13058, 1416.2124)(484.1652, 28281.857)(482.16315, 6311.7017)(483.16675, 2314.185)(463.42215, 31057.525)(464.15207, 5925.231)(465.15472, 862.02246)(490.1269, 741.9375)(471.45035, 4957.3066)
Malvidin 3-O-(6''-acetyl-glucoside)	Flavonoids	8381458	8573857	7320307	7128868	8045005	6102789		10111321	10336192	227532	269659	7803068	8656438		Malvidin 3-O-(6''-acetyl-glucoside) [ C25 H27 O13, tgt=38.42, overall=38.42 ]	(538.15656, 50436.25)(539.1559, 12610.786)(540.15375, 3048.6016)(536.15796, 171615.39)(537.1584, 74032.375)(535.1703, 7439.87)(536.1731, 918.5)(543.1387, 48367.074)(544.1411, 9212.84)(545.14386, 1094.06)
Scutellarein	Flavonoids	485803	470225	976501	1562745	452076	446058		963629	1	599412	553709	409977	386023		Scutellarein [ C15 H10 O6, tgt=47.62, overall=47.62 ]	(287.0503, 28031.03)(288.05316, 2219.0864)(271.6464, 6691.9165)(273.0479, 1592.4825)(307.98282, 1422.5189)(286.06775, 1529.6199)(293.03058, 349.905)
Myricetin 3-O-glucoside	Flavonoids	248286	259252	365469	350733	118879	111025		149151	129535	1315232	1313499	1597613	1541400		Myricetin 3-O-glucoside [ C21 H20 O13, tgt=35.70, overall=35.70 ]	(481.0923, 1217.3999)(463.07928, 32578.738)(464.08194, 4542.619)(465.08447, 668.85004)(487.11053, 508.65)(465.09546, 14396.904)(466.09805, 1941.67)(500.13092, 10687.38)(501.6405, 1905.9325)(481.12222, 898.12335)(485.1333, 7067.39)(486.1357, 1491.33)(487.07825, 242559.45)(489.08215, 6096.66)
Isorhamnetin 7-O-rhamnoside	Flavonoids	151243	139644	161030	127942	230422	229887		1	1	219936	359614	225087	205930		Isorhamnetin 7-O-rhamnoside [ C22 H22 O11, tgt=57.36, overall=57.36 ]	(464.12045, 3432.48)(445.1037, 1384.64)(467.1371, 1653.2433)(480.90134, 10561.299)(482.15387, 926.612)(463.03537, 11398.841)(465.14328, 12215.887)(485.10678, 15348.913)(486.10962, 4176.56)(487.10226, 1129.4366)(469.1021, 1374.68)
Petunidin 3-O-rhamnoside	Flavonoids	342569	343767	391026	387332	333735	306549		569204	565133	3553567	3158254	209681	290506		Petunidin 3-O-rhamnoside [ C22 H23 O11, tgt=62.48, overall=62.48 ]	(467.129, 2248.655)(469.1322, 27872.35)(447.1244, 359.55)(467.1441, 2979.6152)(468.1468, 1113.35)(448.13058, 1416.2124)(484.1652, 28281.857)(482.16315, 6311.7017)(483.16675, 2314.185)(463.42215, 31057.525)(464.15207, 5925.231)(465.15472, 862.02246)(490.1269, 741.9375)(471.45035, 4957.3066)
6-Hydroxyluteolin	Flavonoids	2305913	2141838	2008616	177742	279504	2039418		194888	2258407	285552	2926288	263859	259315		6-Hydroxyluteolin [ C15 H10 O7, tgt=56.54, overall=56.54 ]	(303.04526, 49788.01)(304.04816, 5011.9697)(305.05005, 977.675)(284.7846, 27964.959)(285.03387, 6252.608)(305.05716, 4247.5835)(286.54205, 14090.074)(324.091, 1505.42)(325.0855, 922.06)(302.0678, 387.91)(327.0392, 438.78)
Peonidin 3-O-(6''-acetyl-glucoside)	Flavonoids	356815	305343	692386	1	1	1		305954	302559	2071163	2220664	1	156678		Peonidin 3-O-(6''-acetyl-glucoside) [ C24 H25 O12, tgt=17.61, overall=17.61 ]	(507.13724, 2703.14)(509.1468, 5952.255)(491.14417, 2324.71)(523.5712, 37710.875)(524.1732, 8081.1875)(506.83286, 8822.108)(507.369, 1164.168)(528.1241, 2800.11)(515.1198, 2189.38)
Peonidin 3-O-rutinoside	Flavonoids	3053340	2744697	7357011	3118468	2584505	2662207		4111086	3922806	9322572	9073908	2672790	2474206		Peonidin 3-O-rutinoside [ C28 H33 O15, tgt=40.40, overall=40.40 ]	(610.1815, 1847.6688)(613.5244, 536.11664)(611.198, 465.78)(593.18976, 17071.023)(594.1926, 2769.5679)(631.22614, 10108.492)(632.2291, 4781.305)(615.2129, 1209.5)(637.1805, 6391.62)(638.1826, 1201.36)(618.3717, 7272.828)(620.1724, 2245.8098)
Petunidin 3,5-O-diglucoside	Flavonoids	2102613	1	1407162	1	1	1		1	1	164020	1806580	1	1		Petunidin 3,5-O-diglucoside [ C28 H33 O17, tgt=23.71, overall=23.71 ]	(659.8839, 32630.172)(660.8841, 9471.827)(661.2166, 4257.94)(641.20435, 7587.0547)(642.20245, 1156.1083)(648.1593, 6533.355)(649.16223, 658.805)
Quercetin 3-O-glucosyl-xyloside	Flavonoids	251702	252324	205924	203715	145290	139077		299939	313395	4402127	1	124625	116031		Quercetin 3-O-glucosyl-xyloside [ C26 H28 O11, tgt=65.89, overall=65.89 ]	(499.1482, 490.68)(501.1641, 639.71)(519.1753, 11347.83)(520.1791, 1186.96)(534.1935, 7662.444)(535.2013, 2119.475)(517.1963, 17091.75)(518.1989, 2636.71)(539.2609, 15386.622)(540.25903, 3691.5933)(525.1472, 3288.04)(526.1523, 373.58)
Peonidin 3-O-arabinoside	Flavonoids	538567	562597	449980	449300	438483	1		313285	304123	2639467	2565022	430740	420184		Peonidin 3-O-arabinoside [ C21 H21 O10, tgt=61.23, overall=61.23 ]	(433.1073, 244374.16)(434.1099, 42249.883)(435.11157, 5418.745)(417.61002, 3433.2961)(438.51697, 19570.861)(439.67584, 22909.23)(438.63834, 21906.371)(417.1176, 3559.725)(419.1245, 1938.29)(455.75815, 18267.543)(452.15277, 7924.955)(433.13983, 24425.113)(434.1433, 3083.814)(457.19287, 10404.021)(458.1111, 401.82)(439.09277, 323.54333)
Luteolin	Flavonoids	485803	470225	976501	1562745	452076	446058		963629	1	599412	553709	409977	386023		Luteolin [ C15 H10 O6, tgt=47.62, overall=47.62 ]	(287.0503, 28031.03)(288.05316, 2219.0864)(271.6464, 6691.9165)(273.0479, 1592.4825)(307.98282, 1422.5189)(286.06775, 1529.6199)(293.03058, 349.905)
Cyanidin 3-O-(6''-succinyl-glucoside)	Flavonoids	1	1	1	1	1	1		1	1	141112	131554	1	1		Cyanidin 3-O-(6''-succinyl-glucoside) [ C25 H25 O14, tgt= ]	(533.1156, 71375.39)(534.1176, 9750.928)(551.15625, 11254.01)(552.15894, 1012.265)
Genistein	Flavonoids	3208222	2882353	4486899	4516886	4377008	4264019		1428987	1438619	268555	267569	4052571	4089228		Genistein [ C15 H10 O5, tgt=67.89, overall=67.89 ]	(271.06104, 2871.08)(256.89294, 13216.719)(257.89502, 3221.8877)(270.27792, 1742.3949)(275.03336, 79665.484)(276.03604, 3166.908)(277.03217, 134.59)
Pelargonidin 3-O-rutinoside	Flavonoids	4028540	4092766	2063216	1818342	1987280	1897923		2009886	1959345	8362529	1431318	1949189	1885662		Pelargonidin 3-O-rutinoside [ C27 H31 O14, tgt=67.66, overall=67.66 ]	(606.6698, 2362.7)(606.1769, 958.15)(563.16345, 2299.6948)(579.1744, 20470.605)(580.17694, 4109.0576)(581.17535, 1562.915)(579.1933, 10321.015)(580.19604, 290.22)
Cirsilineol	Flavonoids	1679318	1	2386861	8212049	1130430	1130229		1348845	430141	2311570	1788651	6505314	6351650		Cirsilineol [ C18 H16 O7, tgt=56.34, overall=56.34 ]	(345.72775, 14684.272)(346.34235, 3080.6125)(330.58978, 1040.675)(349.1084, 1089.842)(329.59442, 2072.065)(331.0931, 6488.47)(363.7932, 2170.9333)(363.1184, 106.01)(346.72104, 26175.596)(347.67957, 5032.1606)(347.1255, 5094.89)(353.07843, 24066.973)(354.08093, 3809.1384)
3-Methoxysinensetin	Flavonoids	2917582	3027515	3297651	1819788	1403754	1429126		1040264	1059201	6491541	6366304	3391869	1399100		3-Methoxysinensetin [ C21 H22 O8, tgt=76.18, overall=76.18 ]	(404.63696, 24636.807)(406.14053, 3174.568)(407.14172, 771.94995)(384.12057, 32947.605)(385.12604, 4030.9302)(403.81332, 8501.888)(389.1351, 10524.96)(423.17636, 8505.685)(424.1792, 2318.755)(403.4226, 56077.027)(404.15857, 13325.848)(405.162, 1462.0133)(411.11743, 8922.79)(412.1181, 1934.55)
Kaempferol	Flavonoids	485803	470225	976501	1562745	452076	446058		963629	1	599412	553709	409977	386023		Kaempferol [ C15 H10 O6, tgt=47.62, overall=47.62 ]	(287.0503, 28031.03)(288.05316, 2219.0864)(271.6464, 6691.9165)(273.0479, 1592.4825)(307.98282, 1422.5189)(286.06775, 1529.6199)(293.03058, 349.905)
Delphinidin 3-O-glucoside	Flavonoids	1	1	240943	224973	145705	160462		323800	310867	502777	505901	146281	141200		Delphinidin 3-O-glucoside [ C21 H21 O12, tgt= ]	(469.12357, 3377.68)(483.13907, 17570.178)(484.1419, 2086.3418)(485.13412, 827.815)(468.806, 19565.78)
Delphinidin 3,5-O-diglucoside	Flavonoids	118006	136636	378684	350453	577706	561966		377750	361014	490970	476736	535769	521190		Delphinidin 3,5-O-diglucoside [ C27 H31 O17, tgt=59.81, overall=59.81 ]	(611.1502, 5144.6978)(612.1545, 3943.4448)(628.1841, 1737.2161)(629.1844, 1144.7151)(633.13654, 33920.035)(634.138, 8828.085)(635.139, 3072.277)(636.13824, 844.8733)
(+)-Catechin 3-O-glucose	Flavonoids	6622152	7000598	3308962	3186389	3726808	3903941		1740588	4650627	4088698	4109032	3478388	2788812		(+)-Catechin 3-O-glucose [ C21 H24 O11, tgt=87.16, overall=87.16 ]	(453.16113, 482902.66)(454.16415, 110776.18)(455.16177, 36174.5)(456.1628, 5028.5283)
6''-O-Acetylgenistin	Flavonoids	816705	235264	414850	392698	652285	343831		500897	484879	833760	788484	650839	349619		6''-O-Acetylgenistin [ C23 H22 O11, tgt=57.16, overall=57.16 ]	(479.1229, 437.73)(458.4451, 7629.7534)(458.8634, 435.2725)(475.79883, 20000.514)(476.79794, 3712.7334)(477.1301, 2582.79)(458.1206, 1118.0725)(493.1587, 4648.9106)(494.1589, 1628.2401)(474.64343, 3096.6174)(501.11972, 53763.168)(502.12265, 11096.495)(503.12173, 1669.9601)
Galangin	Flavonoids	3208222	2882353	4486899	4516886	4377008	4264019		1428987	1438619	268555	267569	4052571	4089228		Galangin [ C15 H10 O5, tgt=67.89, overall=67.89 ]	(271.06104, 2871.08)(256.89294, 13216.719)(257.89502, 3221.8877)(270.27792, 1742.3949)(275.03336, 79665.484)(276.03604, 3166.908)(277.03217, 134.59)
(+)-Catechin 3-O-gallate	Flavonoids	1	1	1	1	1	1		1	1	107277	1	1	1		(+)-Catechin 3-O-gallate [ C22 H18 O10, tgt= ]	(425.3713, 8603.773)(426.08707, 1678.0801)(427.08344, 698.8)(426.08893, 3091.2349)(426.0874, 560.91)(460.62347, 1086.62)(442.1113, 24487.16)(453.0902, 296.42)
Eupatorin	Flavonoids	1679318	1	2386861	8212049	1130430	1130229		1348845	430141	2311570	1788651	6505314	6351650		Eupatorin [ C18 H16 O7, tgt=56.34, overall=56.34 ]	(345.72775, 14684.272)(346.34235, 3080.6125)(330.58978, 1040.675)(349.1084, 1089.842)(329.59442, 2072.065)(331.0931, 6488.47)(363.7932, 2170.9333)(363.1184, 106.01)(346.72104, 26175.596)(347.67957, 5032.1606)(347.1255, 5094.89)(353.07843, 24066.973)(354.08093, 3809.1384)
Apigenin 6-C-glucoside	Flavonoids	92631	93722	126267	164297	136529	138137		167730	157967	298296	298760	146045	130016		Apigenin 6-C-glucoside [ C21 H20 O10, tgt=52.43, overall=52.43 ]	(433.10538, 131312.83)(434.10797, 21300.26)(435.11124, 4190.0728)(415.89883, 1520.8679)(419.11456, 2071.205)(455.15128, 1258.35)(434.4692, 11357.981)(433.12274, 810.695)(456.42593, 33817.508)(456.09155, 34098.16)(457.09338, 4319.1797)(437.94806, 7605.077)(442.0972, 2505.78)
Tetramethylscutellarein	Flavonoids	3280365	3334897	1	2855174	1260458	7679122		8131877	7642057	21715440	21273938	7660050	7457616		Tetramethylscutellarein [ C19 H18 O6, tgt=66.73, overall=66.73 ]	(343.1134, 127410.56)(344.11624, 23559.76)(345.11984, 20304.486)(346.1253, 1357.09)(324.60358, 35954.15)(325.11093, 9411.275)(326.1048, 4671.49)(343.11688, 916.105)(326.2003, 3099.7908)(360.14368, 16513.385)(361.1359, 8918.367)(362.1361, 2454.42)(345.05862, 4211.556)(345.1413, 20094.52)(346.1492, 1009.51)(366.37576, 268488.9)(366.1028, 37684.35)(367.1026, 7318.9873)(350.38336, 2998.8901)(351.4331…
Isorhamnetin 3-O-glucuronide	Flavonoids	1	1	1	1	1	1		1	1	95220	94839	1	1		Isorhamnetin 3-O-glucuronide [ C22 H20 O13, tgt= ]	(499.11078, 2688.8599)(515.08264, 6052.515)
Poncirin	Flavonoids	775897	2868845	2138782	2126926	10205501	2119205		5558595	5554322	16851106	4474324	2107118	1968696		Poncirin [ C28 H34 O14, tgt=60.40, overall=60.40 ]	(594.64703, 2362.4626)(577.1849, 12955.667)(578.1982, 6831.8)(595.20575, 70939.56)(596.20856, 17682.541)(597.211, 1304.9733)(577.7965, 24389.416)(578.1981, 6590.9414)(579.1949, 643.8)(615.2364, 262.15)(594.64386, 35612.402)(595.6458, 6907.7764)(599.2263, 2228.08)(620.5247, 5615.5293)(620.48035, 2042.2687)(621.20355, 4197.468)(601.17883, 313.82)
Nobiletin	Flavonoids	2917582	3027515	3297651	1819788	1403754	1429126		1040264	1059201	6491541	6366304	3391869	1399100		Nobiletin [ C21 H22 O8, tgt=76.18, overall=76.18 ]	(404.63696, 24636.807)(406.14053, 3174.568)(407.14172, 771.94995)(384.12057, 32947.605)(385.12604, 4030.9302)(403.81332, 8501.888)(389.1351, 10524.96)(423.17636, 8505.685)(424.1792, 2318.755)(403.4226, 56077.027)(404.15857, 13325.848)(405.162, 1462.0133)(411.11743, 8922.79)(412.1181, 1934.55)
Rhoifolin	Flavonoids	1144272	1204746	1518386	2056313	1839756	1773888		1834506	1803540	6937633	7718325	1821272	1737676		Rhoifolin [ C27 H30 O14, tgt=40.93, overall=40.93 ]	(579.00555, 15421.681)(580.1756, 3483.2024)(581.17487, 1995.405)(563.16327, 1100.916)(579.1752, 31566.434)(580.17755, 5882.9946)(581.1757, 1762.8757)(578.1828, 4726.46)(579.192, 1737.24)
Cyanidin 3-O-xyloside	Flavonoids	306286	334078	897792	856602	644568	640065		1049311	1043851	1034257	2476965	629746	614861		Cyanidin 3-O-xyloside [ C20 H19 O10, tgt=59.30, overall=59.30 ]	(422.104, 2688.29)(423.11905, 23542.738)(424.12158, 932.9733)(405.1088, 351.22)(437.13452, 48590.344)(438.13754, 8073.5625)(439.1403, 1611.7961)(420.3687, 3556.585)(425.0853, 11039.519)(426.08716, 2221.4714)(427.08344, 931.73)
Didymin	Flavonoids	775897	2868845	2138782	2126926	10205501	2119205		5558595	5554322	16851106	4474324	2107118	1968696		Didymin [ C28 H34 O14, tgt=60.40, overall=60.40 ]	(594.64703, 2362.4626)(577.1849, 12955.667)(578.1982, 6831.8)(595.20575, 70939.56)(596.20856, 17682.541)(597.211, 1304.9733)(577.7965, 24389.416)(578.1981, 6590.9414)(579.1949, 643.8)(615.2364, 262.15)(594.64386, 35612.402)(595.6458, 6907.7764)(599.2263, 2228.08)(620.5247, 5615.5293)(620.48035, 2042.2687)(621.20355, 4197.468)(601.17883, 313.82)
Kaempferol 3-O-(2''-rhamnosyl-6''-acetyl-galactoside) 7-O-rhamnoside	Flavonoids	1	1	1	1	1	1		1	1	3985900	3965351	1	1		Kaempferol 3-O-(2''-rhamnosyl-6''-acetyl-galactoside) 7-O-rhamnoside [ C35 H42 O20, tgt= ]	(782.2202, 885.45)(767.224, 1088.01)(768.2272, 276.73)(765.2344, 2587.71)(784.59174, 5335.906)(784.2585, 1046.115)(785.26984, 2822.2651)
7,4'-Dihydroxyflavone	Flavonoids	6534789	6846755	4192691	4190741	2902198	2799877		1866854	1876800	1226502	1230571	2860485	2756351		7,4'-Dihydroxyflavone [ C15 H10 O4, tgt=63.41, overall=63.41 ]	(258.9061, 13650.297)(238.05237, 3581.359)(255.06729, 27247.465)(256.0699, 6564.053)(274.76416, 32593.295)(277.10715, 9961.54)(254.08255, 143.8)(277.04648, 658.98)(259.03513, 68953.11)(261.02695, 3293.0862)
Genistin	Flavonoids	1	1	1	1	1	1		1	1	208391	1	1	1		Genistin [ C22 H20 O10, tgt= ]	(462.56732, 30590.424)(463.71036, 5815.759)(471.1032, 278.16)(455.0956, 689.505)
Vitisin A	Flavonoids	1	1	1	1	1	1		1	1	627800	592935	1	1		Vitisin A [ C26 H25 O14, tgt= ]	(561.1212, 6055.605)(562.1206, 698.485)(561.15344, 6630.29)(562.1521, 889.45496)
Quercetin 3,4'-O-diglucoside	Flavonoids	443062	1	831742	799104	1169047	1152432		914126	878588	897462	873131	1126342	1054334		Quercetin 3,4'-O-diglucoside [ C27 H30 O17, tgt=46.71, overall=46.71 ]	(627.1448, 4454.022)(628.14844, 778.97003)(627.463, 981.89996)(649.12823, 59216.49)(650.13055, 12161.827)(651.13104, 1781.2482)(633.14087, 25407.824)(634.1413, 12244.686)(635.13904, 8106.515)(636.13855, 1783.81)
Luteolin 7-O-glucuronide	Flavonoids	248373	259190	365445	350653	1848750	1837053		225221	226947	1298179	1297382	1597386	1541678		Luteolin 7-O-glucuronide [ C21 H18 O12, tgt=35.70, overall=35.70 ]	(463.07935, 28213.053)(464.08212, 3782.384)(465.08447, 668.85004)(463.08026, 70162.84)(464.0829, 10310.67)(465.08505, 868.69)(483.12808, 802.4325)(485.13342, 5611.1953)(486.1358, 1134.235)(485.06183, 69631.65)(486.0642, 10444.811)(487.065, 1405.51)
6,8-Dihydroxykaempferol	Flavonoids	2206772	2193695	872402	839207	279504	552688		13164141	13072381	345188	308487	263497	522075		6,8-Dihydroxykaempferol [ C15 H12 O8, tgt=45.94, overall=45.94 ]	(321.41687, 76977.59)(322.05585, 20099.67)(323.05737, 3682.9849)(303.04523, 53573.14)(304.04816, 5520.1226)(305.05005, 977.675)(305.0577, 27121.094)(306.06097, 3035.275)(338.087, 27365.594)(339.08517, 5007.4023)(323.48553, 1486.2961)(325.0852, 708.15)(327.0391, 5719.7217)
Delphinidin 3-O-(6''-acetyl-glucoside)	Flavonoids	1	1	1	1	193830	200446		348293	331723	2294388	2299151	190149	1		Delphinidin 3-O-(6''-acetyl-glucoside) [ C23 H23 O13, tgt= ]	(525.1494, 38314.242)(526.15216, 5779.863)(527.1556, 2960.4448)(507.13855, 543.92)(533.1161, 87241.61)(534.11804, 11844.145)
Pelargonidin 3-O-arabinoside	Flavonoids	1	1	192954	154987	124633	1		220761	211665	949763	888669	1	1		Pelargonidin 3-O-arabinoside [ C20 H19 O9, tgt= ]	(407.1178, 1364.7467)(387.09872, 33560.17)(388.10132, 2282.6565)(421.14017, 25976.225)(422.1429, 2920.4766)(423.14807, 428.54)(407.1397, 446.905)
(-)-Epicatechin	Flavonoids	977943	951626	1058087	1035233	962280	942592		1	1967435	322648	329559	1102923	936997		(-)-Epicatechin [ C15 H14 O6, tgt=64.64, overall=64.64 ]	(290.7448, 4718.1147)(276.7501, 20766.26)(293.09427, 6643.2095)(294.0961, 1513.25)(275.39777, 38156.62)(276.369, 3448.5305)(308.1146, 10927.498)(309.11707, 2371.8252)(292.7739, 1239.0868)(317.5785, 1277.6499)(295.79373, 6807.422)(297.0642, 461.61)
Cyanidin 3-O-sophoroside	Flavonoids	10464940	11584626	9872346	9071086	8040755	7696282		13137226	14920644	366332	14692714	9522084	12138826		Cyanidin 3-O-sophoroside [ C27 H31 O16, tgt=45.67, overall=45.67 ]	(612.1725, 99827.84)(613.1718, 30928.39)(614.1696, 8995.27)(615.1662, 1516.28)(595.1559, 2941.2576)(612.17474, 119981.516)(613.174, 38413.45)(611.177, 161433.77)(612.1824, 837.3)(616.6684, 26520.625)(617.93835, 8171.7686)(619.1453, 1391.5084)
Morin	Flavonoids	2305913	2141838	2008616	177742	279504	2039418		194888	2258407	285552	2926288	263859	259315		Morin [ C15 H10 O7, tgt=56.54, overall=56.54 ]	(303.04526, 49788.01)(304.04816, 5011.9697)(305.05005, 977.675)(284.7846, 27964.959)(285.03387, 6252.608)(305.05716, 4247.5835)(286.54205, 14090.074)(324.091, 1505.42)(325.0855, 922.06)(302.0678, 387.91)(327.0392, 438.78)
Formononetin	Flavonoids	140910240	137254896	128696632	126532632	102311536	99541696		95262432	94683064	36268616	35787560	101389488	100491760		Formononetin [ C16 H12 O4, tgt=48.65, overall=48.65 ]	(271.4835, 1347.1155)(250.49353, 8745.009)(252.06844, 973.85754)(273.09085, 283.74)(287.52487, 335136.94)(288.10928, 55414.49)(268.52896, 1127405.2)(270.27203, 204394.81)(270.60538, 12847.52)(291.06586, 11263.287)(275.85855, 3656.55)
Kaempferol 3,7-O-diglucoside	Flavonoids	18949792	20720822	17804492	16652671	15097705	14193846		23674828	26472888	24311160	25598548	17411848	21522280		Kaempferol 3,7-O-diglucoside [ C27 H30 O16, tgt=54.35, overall=54.35 ]	(611.1511, 41391.773)(612.15356, 8718.47)(613.1554, 401.39502)(613.1285, 40488.113)(614.1263, 12245.963)(614.1696, 8495.54)(610.17615, 308310.28)(611.17664, 169018.27)(633.1338, 517915.5)(634.13696, 142259.44)(635.1386, 26588.637)(636.1399, 2735.41)(615.1298, 4931.5903)(617.12787, 537.0688)
3,7-Dimethylquercetin	Flavonoids	758484	781545	2014731	1403478	733549	1119824		388445	371489	608327	1326229	628774	1025110		3,7-Dimethylquercetin [ C17 H14 O7, tgt=59.21, overall=59.21 ]	(334.43805, 10014.148)(315.40527, 1096.9033)(333.08905, 10379.61)(351.1184, 952.14197)(332.3823, 7212.251)(335.1071, 953.07)(337.36557, 3746.8433)(338.05988, 643.42145)
Methylgalangin	Flavonoids	81706	568594	809283	796119	499545	821942		789687	761458	296852	1077557	487985	489633		Methylgalangin [ C16 H12 O5, tgt=60.85, overall=60.85 ]	(288.5266, 1586.2021)(271.07022, 2431.934)(289.08502, 62743.688)(290.08777, 5606.11)(270.0743, 1157.61)(305.1132, 3484.212)(307.11646, 857.74)(284.29413, 42469.17)(285.3467, 4216.804)(286.59375, 1675.24)(308.39572, 1375.9901)(290.8701, 34891.652)(291.0515, 6630.97)
Naringin 4'-O-glucoside	Flavonoids	111223	114905	298281	314403	200788	215917		279132	261653	1495347	1464584	204092	187457		Naringin 4'-O-glucoside [ C33 H42 O19, tgt=44.89, overall=44.89 ]	(743.2414, 6857.7217)(744.2437, 2718.92)(745.24274, 806.8675)(725.2303, 25875.227)(726.23303, 6537.0547)(727.23566, 1350.315)(767.2264, 11695.138)(768.2256, 3406.2227)(769.2285, 291.23)(751.887, 2274.03)(751.22644, 2083.68)
Cyanidin 3-O-arabinoside	Flavonoids	306286	334078	897792	856602	644568	640065		1049311	1043851	1034257	2476965	629746	614861		Cyanidin 3-O-arabinoside [ C20 H19 O10, tgt=59.30, overall=59.30 ]	(422.104, 2688.29)(423.11905, 23542.738)(424.12158, 932.9733)(405.1088, 351.22)(437.13452, 48590.344)(438.13754, 8073.5625)(439.1403, 1611.7961)(420.3687, 3556.585)(425.0853, 11039.519)(426.08716, 2221.4714)(427.08344, 931.73)
Gardenin B	Flavonoids	1307587	1239868	3899845	3785738	1799048	1772578		3534748	2888543	6870293	6634610	3216976	3126596		Gardenin B [ C19 H18 O7, tgt=47.62, overall=47.62 ]	(359.96664, 16075.882)(360.10806, 2068.6433)(344.9413, 1721.0717)(359.2052, 20087.932)(360.28088, 2622.265)(361.10577, 713.16003)(343.86023, 26099.28)(345.31207, 3183.366)(379.47977, 13509.246)(379.14786, 3983.2551)(381.1553, 697.3)(361.13882, 21783.826)(362.14255, 3375.6633)(382.22668, 27135.383)(382.90204, 2983.35)(365.9585, 18146.8)(366.97015, 6553.871)(367.0939, 68266.92)(368.0966, 14943.01)
Malvidin 3-O-glucoside	Flavonoids	393380	384526	397149	395345	174370	181632		379130	409901	1649736	1726868	632392	627372		Malvidin 3-O-glucoside [ C23 H25 O12, tgt=47.30, overall=47.30 ]	(496.1435, 2130.655)(497.1538, 1965.9451)(478.14035, 4330.1733)(477.1301, 3092.88)(512.71234, 18934.027)(513.5098, 6550.678)(493.97195, 26843.838)(494.16125, 4501.7354)(519.13293, 628.435)(499.11206, 919.15)(502.13095, 485.81)
Sakuranetin	Flavonoids	1930794	510757	5801311	2274708	1073508	509313		820774	780423	1144479	3998202	426199	1492676		Sakuranetin [ C16 H14 O5, tgt=57.22, overall=57.22 ]	(291.09933, 3288.3533)(271.8347, 1444.1725)(273.0888, 714.62)(273.09, 16142.464)(274.0923, 2474.6375)(306.1191, 510.4)(287.6077, 106231.29)(288.10904, 17042.623)(313.0832, 5747.059)(314.08673, 23417.746)(292.88724, 3090.0908)
Kaempferol 3-O-glucosyl-rhamnosyl-glucoside	Flavonoids	1	1	488203	586087	342506	1		1	1	123021	118677	1	1		Kaempferol 3-O-glucosyl-rhamnosyl-glucoside [ C33 H40 O20, tgt= ]	(758.2094, 10120.843)(759.2099, 6153.0767)(739.1994, 8044.685)(740.20215, 802.79004)(779.1943, 13687.68)(780.19684, 3469.135)(767.19495, 609.45)
Chrysin	Flavonoids	6534789	6846755	4192691	4190741	2902198	2799877		1866854	1876800	1226502	1230571	2860485	2756351		Chrysin [ C15 H10 O4, tgt=63.41, overall=63.41 ]	(258.9061, 13650.297)(238.05237, 3581.359)(255.06729, 27247.465)(256.0699, 6564.053)(274.76416, 32593.295)(277.10715, 9961.54)(254.08255, 143.8)(277.04648, 658.98)(259.03513, 68953.11)(261.02695, 3293.0862)
6''-O-Acetylglycitin	Flavonoids	209109	195565	1035304	1	596513	570281		545804	767804	1004602	916137	626560	606356		6''-O-Acetylglycitin [ C24 H24 O11, tgt=54.36, overall=54.36 ]	(493.14383, 6209.7437)(494.15356, 338.75)(470.1266, 1951.7)(493.15033, 13525.85)(494.1539, 2036.8584)(507.6004, 3912.058)(508.1737, 735.91)(489.16156, 1924.61)(515.1346, 7803.016)(516.1374, 388.23)(499.12155, 1461.185)
Glycitein	Flavonoids	81706	568594	809283	796119	499545	821942		789687	761458	296852	1077557	487985	489633		Glycitein [ C16 H12 O5, tgt=60.85, overall=60.85 ]	(288.5266, 1586.2021)(271.07022, 2431.934)(289.08502, 62743.688)(290.08777, 5606.11)(270.0743, 1157.61)(305.1132, 3484.212)(307.11646, 857.74)(284.29413, 42469.17)(285.3467, 4216.804)(286.59375, 1675.24)(308.39572, 1375.9901)(290.8701, 34891.652)(291.0515, 6630.97)
6''-O-Malonylgenistin	Flavonoids	5101835	5237304	4417973	4307808	4872180	3676327		1	6318408	138611	130959	4746317	5281093		6''-O-Malonylgenistin [ C24 H22 O13, tgt=35.62, overall=35.62 ]	(503.0988, 3048.564)(504.09946, 626.16833)(543.1089, 1481.05)(539.15137, 7084.3823)(540.1529, 2036.9434)(523.11816, 1075.1001)(529.1005, 425.76)(519.1297, 767.8857)
Isorhamnetin 3-O-glucoside 7-O-rhamnoside	Flavonoids	1	1	781201	782124	1	1		1687186	294158	340692	335562	1	1		Isorhamnetin 3-O-glucoside 7-O-rhamnoside [ C28 H32 O16, tgt=43.70, overall=43.70 ]	(648.1597, 11816.76)(649.16254, 2293.4885)(611.1787, 1405.9767)(643.2046, 161.74)(625.1998, 9094.759)(626.20264, 1079.6216)
Isorhamnetin	Flavonoids	2050627	1977852	1758434	1728967	1761738	721494		413543	1426655	391481	2591355	804794	1580790		Isorhamnetin [ C16 H12 O7, tgt=49.48, overall=49.48 ]	(318.06525, 2613.6687)(318.72964, 1453.3301)(318.40256, 7710.2617)(318.06378, 2740.0981)(302.56357, 1267.9434)(335.95535, 4163.9854)(336.90002, 2402.886)(319.72897, 5197.0273)(320.0917, 3625.0696)(341.4553, 1478.0612)(325.30173, 3425.4062)(325.0448, 355.37)
Phloridzin	Flavonoids	753543	850509	905170	858211	1148937	639591		1679950	1649894	977773	1515038	629236	614396		Phloridzin [ C21 H24 O10, tgt=52.10, overall=52.10 ]	(437.55496, 28376.53)(439.25266, 11438.655)(439.9992, 1687.487)(438.7504, 103144.984)(440.15317, 20212.771)(424.15024, 4559.208)(454.88403, 52836.992)(460.18, 52934.05)(437.17, 3955.45)(460.8233, 7443.093)(462.13632, 1060.3159)(441.11658, 1264.76)
(-)-Epicatechin 3-O-gallate	Flavonoids	1	1	1	1	1	1		1	1	107277	1	1	1		(-)-Epicatechin 3-O-gallate [ C22 H18 O10, tgt= ]	(425.3713, 8603.773)(426.08707, 1678.0801)(427.08344, 698.8)(426.08893, 3091.2349)(426.0874, 560.91)(460.62347, 1086.62)(442.1113, 24487.16)(453.0902, 296.42)
Quercetin 3-O-xyloside	Flavonoids	1	149173	85206	84929	1	1		1	91005	205509	191358	1	1		Quercetin 3-O-xyloside [ C20 H18 O11, tgt=29.26, overall=29.26 ]	(435.9784, 4427.666)(436.80362, 4283.7017)(455.12466, 51964.594)(456.03534, 18490.227)(456.98453, 8247.997)(457.6277, 9007.055)(458.129, 1500.49)(436.2547, 20776.014)(435.11124, 4190.0728)(461.091, 728.5)(443.07944, 607.92334)
Dihydromyricetin 3-O-rhamnoside	Flavonoids	1	1	128971	117281	3011530	200806		237570	228347	319023	321094	195987	183528		Dihydromyricetin 3-O-rhamnoside [ C21 H22 O12, tgt=46.23, overall=46.23 ]	(467.1076, 2283.06)(449.1004, 14159.922)(450.10327, 4019.9666)(473.1297, 1663.0399)(452.31552, 11594.305)(452.6161, 3605.85)(489.15814, 1737.7386)(468.4291, 9868.329)(469.8432, 3325.123)(471.1468, 1122.9086)(472.1489, 365.45)(471.0835, 199786.95)(472.08615, 35792.777)(473.08777, 4582.3374)
Phloretin	Flavonoids	256730	260278	921154	153091	291441	661608		577422	587208	751430	610506	471373	448984		Phloretin [ C15 H14 O5, tgt=67.43, overall=67.43 ]	(277.0902, 24721.53)(257.7208, 8968.728)(257.08105, 1204.5461)(278.10278, 676.15)(260.24673, 18758.6)(262.09378, 1531.25)(275.96698, 165883.28)(276.11072, 24342.572)(279.1227, 845.7067)(300.65527, 2469.5593)(301.58575, 4081.8076)(302.08722, 389.41998)(281.0661, 239.56)
Quercetin 3-O-sophoroside	Flavonoids	443062	1	831742	799104	1169047	1152432		913252	868841	897462	873131	1126342	1054334		Quercetin 3-O-sophoroside [ C27 H30 O17, tgt=46.71, overall=46.71 ]	(627.1448, 4454.022)(628.14844, 778.97003)(627.463, 981.89996)(649.12823, 59216.49)(650.13055, 12161.827)(651.13104, 1781.2482)(633.14087, 25407.824)(634.1413, 12244.686)(635.13904, 8106.515)(636.13855, 1783.81)
Quercetin 3-O-rhamnoside	Flavonoids	249789	249370	230675	215000	2622886	283404		1	334054	473790	456560	283713	2489119		Quercetin 3-O-rhamnoside [ C21 H20 O11, tgt=36.06, overall=36.06 ]	(449.50284, 10897.802)(450.10327, 4019.9666)(431.0887, 6017.1465)(453.11728, 19191.182)(450.1039, 6817.37)(468.6817, 8908.317)(470.3949, 12968.934)(471.48074, 2940.655)(472.1489, 365.45)(450.12836, 344.56)(471.08344, 208398.22)(472.0861, 36744.01)(473.0877, 4784.0)
Cyanidin 3,5-O-diglucoside	Flavonoids	10464940	11584626	9872346	9071086	8040755	7696282		13137226	14920644	366332	14692714	9522084	12138826		Cyanidin 3,5-O-diglucoside [ C27 H31 O16, tgt=45.67, overall=45.67 ]	(612.1725, 99827.84)(613.1718, 30928.39)(614.1696, 8995.27)(615.1662, 1516.28)(595.1559, 2941.2576)(612.17474, 119981.516)(613.174, 38413.45)(611.177, 161433.77)(612.1824, 837.3)(616.6684, 26520.625)(617.93835, 8171.7686)(619.1453, 1391.5084)
Quercetin 3-O-galactoside 7-O-rhamnoside	Flavonoids	18949792	20720822	17804492	16652671	15097705	14193846		23674828	26472888	24311160	25598548	17411848	21522280		Quercetin 3-O-galactoside 7-O-rhamnoside [ C27 H30 O16, tgt=54.35, overall=54.35 ]	(611.1511, 41391.773)(612.15356, 8718.47)(613.1554, 401.39502)(613.1285, 40488.113)(614.1263, 12245.963)(614.1696, 8495.54)(610.17615, 308310.28)(611.17664, 169018.27)(633.1338, 517915.5)(634.13696, 142259.44)(635.1386, 26588.637)(636.1399, 2735.41)(615.1298, 4931.5903)(617.12787, 537.0688)
Isorhoifolin	Flavonoids	1144272	1204746	1518386	2056313	1839756	1773888		1834506	1803540	6937633	7718325	1821272	1737676		Isorhoifolin [ C27 H30 O14, tgt=40.93, overall=40.93 ]	(579.00555, 15421.681)(580.1756, 3483.2024)(581.17487, 1995.405)(563.16327, 1100.916)(579.1752, 31566.434)(580.17755, 5882.9946)(581.1757, 1762.8757)(578.1828, 4726.46)(579.192, 1737.24)
Pelargonidin 3-O-(6''-malonyl-glucoside)	Flavonoids	2508664	2582174	2079111	2052648	2360702	1740611		3038267	3169561	2748932	2989281	2308382	2601194		Pelargonidin 3-O-(6''-malonyl-glucoside) [ C24 H23 O13, tgt=69.56, overall=69.56 ]	(538.15607, 49530.87)(539.1555, 12493.786)(540.15326, 2968.6035)(519.12994, 1326.0795)(543.0686, 3058.1184)(544.1105, 629.565)
Eriodictyol 7-O-glucoside	Flavonoids	832342	556925	1619464	422851	1195690	1198810		1910491	1841378	2676766	2522985	1217004	420457		Eriodictyol 7-O-glucoside [ C21 H23 O11, tgt=63.11, overall=63.11 ]	(453.12872, 9755.705)(454.13177, 1848.815)(455.13818, 3345.18)(457.1489, 12862.455)(438.13446, 15861.01)(439.5661, 1699.2756)(469.1606, 663141.25)(470.16293, 132141.38)(457.09747, 15896.13)(457.10913, 10611.019)(458.1111, 640.13)
Naringin	Flavonoids	20280570	21461356	28961038	29231356	23296984	23337464		25797156	16996116	26010140	821736	23734184	22951240		Naringin [ C27 H32 O14, tgt=54.24, overall=54.24 ]	(580.3919, 5810.829)(581.1754, 2227.0527)(585.2054, 205.08)(569.1885, 2418.77)(607.37024, 4689.0635)(607.18054, 2498.948)(608.1859, 1133.605)(609.1843, 2256.3052)(587.1638, 10579.82)(588.16614, 2168.81)
Quercetin 4'-O-glucoside	Flavonoids	2610817	2705520	3334466	3240472	1261671	1282825		942282	887630	5250227	5159048	1280556	1262581		Quercetin 4'-O-glucoside [ C21 H20 O7, tgt=76.18, overall=76.18 ]	(384.42014, 28102.12)(385.12665, 6611.2437)(366.94568, 113760.6)(367.119, 30574.818)(368.11755, 4504.395)(387.1382, 6449.45)(388.1409, 711.55)(370.30765, 67213.77)(371.2276, 8720.694)(370.1305, 194.61665)(371.1259, 181617.95)(372.1285, 20105.717)(403.7388, 53348.332)(404.56027, 8422.301)(404.1579, 1106.655)(387.15552, 81871.79)(388.15854, 9901.598)(389.1561, 94877.55)(409.4498, 1668.5684)(411.116…
Petunidin 3-O-(6''-acetyl-glucoside)	Flavonoids	1	327584	1	1	305932	1		390289	405058	550828	550165	271106	321128		Petunidin 3-O-(6''-acetyl-glucoside) [ C24 H25 O13, tgt= ]	(527.14404, 2013.31)(509.13556, 476.14502)(539.1566, 15895.904)(540.1553, 3720.8406)(541.1581, 756.62)(542.1611, 157.42)(521.15344, 2177.405)(544.1109, 710.62)(527.10956, 13925.144)(528.1177, 6007.9)
Biochanin A	Flavonoids	81706	568594	809283	796119	499545	821942		789687	761458	296852	1077557	487985	489633		Biochanin A [ C16 H12 O5, tgt=60.85, overall=60.85 ]	(288.5266, 1586.2021)(271.07022, 2431.934)(289.08502, 62743.688)(290.08777, 5606.11)(270.0743, 1157.61)(305.1132, 3484.212)(307.11646, 857.74)(284.29413, 42469.17)(285.3467, 4216.804)(286.59375, 1675.24)(308.39572, 1375.9901)(290.8701, 34891.652)(291.0515, 6630.97)
Neoeriocitrin	Flavonoids	664382	3800448	909567	941371	545019	532354		771226	790833	1104911	1079972	558687	525001		Neoeriocitrin [ C27 H32 O15, tgt=52.50, overall=52.50 ]	(579.1708, 4742.255)(580.1728, 276.39)(603.1958, 65032.375)(579.17474, 22138.225)(580.17725, 4006.5278)(581.1754, 1692.6029)(615.2149, 8244.093)(616.2174, 1183.6951)(621.8372, 5556.257)(620.17236, 968.088)(621.172, 402.49)(605.5274, 1315.22)
Daidzein	Flavonoids	6534789	6846755	4192691	4190741	2902198	2799877		1866854	1876800	1226502	1230571	2860485	2756351		Daidzein [ C15 H10 O4, tgt=63.41, overall=63.41 ]	(258.9061, 13650.297)(238.05237, 3581.359)(255.06729, 27247.465)(256.0699, 6564.053)(274.76416, 32593.295)(277.10715, 9961.54)(254.08255, 143.8)(277.04648, 658.98)(259.03513, 68953.11)(261.02695, 3293.0862)
Luteolin 7-O-glucoside	Flavonoids	249789	249370	230675	215000	2622886	283404		1	334054	473790	456560	283713	2489119		Luteolin 7-O-glucoside [ C21 H20 O11, tgt=36.06, overall=36.06 ]	(449.50284, 10897.802)(450.10327, 4019.9666)(431.0887, 6017.1465)(453.11728, 19191.182)(450.1039, 6817.37)(468.6817, 8908.317)(470.3949, 12968.934)(471.48074, 2940.655)(472.1489, 365.45)(450.12836, 344.56)(471.08344, 208398.22)(472.0861, 36744.01)(473.0877, 4784.0)
Isoxanthohumol	Flavonoids	22511436	22656664	38294000	2093186	48059432	48116344		2094963	2051524	36520892	35633016	47105596	46558632		Isoxanthohumol [ C21 H22 O5, tgt=60.94, overall=60.94 ]	(381.14618, 82375.27)(382.14896, 11433.399)(341.1511, 41357.977)(342.1532, 5845.845)(359.16052, 6924.373)(375.7728, 1508.9135)(376.1899, 282.4)(363.1356, 2922.75)(364.1385, 196.48)(356.6501, 388707.9)(357.43008, 118443.33)(357.1734, 42795.035)
Quercetin 3-O-rhamnosyl-galactoside	Flavonoids	18949792	20720822	17804492	16652671	15097705	14193846		23674828	26472888	24311160	25598548	17411848	21522280		Quercetin 3-O-rhamnosyl-galactoside [ C27 H30 O16, tgt=54.35, overall=54.35 ]	(611.1511, 41391.773)(612.15356, 8718.47)(613.1554, 401.39502)(613.1285, 40488.113)(614.1263, 12245.963)(614.1696, 8495.54)(610.17615, 308310.28)(611.17664, 169018.27)(633.1338, 517915.5)(634.13696, 142259.44)(635.1386, 26588.637)(636.1399, 2735.41)(615.1298, 4931.5903)(617.12787, 537.0688)
(+)-Gallocatechin 3-O-gallate	Flavonoids	1	1	641184	1	1	743128		510335	493121	956254	917443	724730	1		(+)-Gallocatechin 3-O-gallate [ C22 H18 O11, tgt= ]	(461.09207, 915.75665)(441.08002, 11058.877)(442.08228, 1924.2129)(443.07944, 654.05334)(479.13373, 750.315)(459.1182, 2866.53)(487.0886, 1687.6064)(465.22308, 7528.778)(468.07867, 1567.825)
Quercetin 3-O-rhamnosyl-rhamnosyl-glucoside	Flavonoids	1	1	488203	586087	342506	1		1	1	123021	118677	1	1		Quercetin 3-O-rhamnosyl-rhamnosyl-glucoside [ C33 H40 O20, tgt= ]	(758.2094, 10416.228)(759.2099, 6373.4126)(739.1994, 8044.685)(740.20215, 802.79004)(779.1943, 13687.68)(780.19684, 3469.135)(767.19495, 609.45)
Pelargonidin 3-O-glucoside	Flavonoids	538567	562597	449980	449300	438483	1		313285	304123	2639467	2565022	430740	420184		Pelargonidin 3-O-glucoside [ C21 H21 O10, tgt=61.23, overall=61.23 ]	(433.1073, 244374.16)(434.1099, 42249.883)(435.11157, 5418.745)(417.61002, 3433.2961)(438.51697, 19570.861)(439.67584, 22909.23)(438.63834, 21906.371)(417.1176, 3559.725)(419.1245, 1938.29)(455.75815, 18267.543)(452.15277, 7924.955)(433.13983, 24425.113)(434.1433, 3083.814)(457.19287, 10404.021)(458.1111, 401.82)(439.09277, 323.54333)
Delphinidin 3-O-xyloside	Flavonoids	1	1	1	1	1	1		743405	736680	839223	570831	1	1		Delphinidin 3-O-xyloside [ C20 H19 O11, tgt= ]	(436.42502, 14705.388)(436.08972, 3164.37)(441.10895, 49563.17)(421.1032, 2027.84)(453.12912, 24785.365)(454.1319, 4281.1226)(455.1308, 685.3025)(435.11884, 23568.752)(436.12152, 2789.8782)(461.09253, 967.45996)(441.08, 10903.323)(442.0821, 2121.2998)(443.07944, 616.0933)
6-Geranylnaringenin	Flavonoids	5877112	5926002	8807700	8665387	14630785	11916602		5607486	5858270	4973582	4934955	10066781	10148128		6-Geranylnaringenin [ C25 H28 O5, tgt=78.46, overall=78.46 ]	(413.42868, 16892.17)(391.47186, 1056.2672)(392.18466, 135.55501)(393.03418, 1963.1373)(426.22598, 11444.63)(427.22754, 1628.9008)(408.2151, 160.705)(431.1812, 166110.97)(432.1848, 30494.15)(433.18765, 4315.04)(434.1885, 312.40253)(413.17136, 73443.57)(414.17404, 12985.565)
Cyanidin 3-O-glucosyl-rutinoside	Flavonoids	1	1	548793	1	1	1		1	1	761458	706769	1	1		Cyanidin 3-O-glucosyl-rutinoside [ C33 H41 O20, tgt= ]	(763.2308, 52717.39)(764.2333, 14034.755)(779.26416, 5018.1177)(780.26294, 1036.8625)(781.2755, 1252.3125)(757.7551, 7842.0195)(758.2563, 2340.52)(781.2168, 2976.7766)(782.2202, 639.49)
Jaceosidin	Flavonoids	758484	781545	2014731	1403478	733549	1119824		388445	371489	608327	1326229	628774	1025110		Jaceosidin [ C17 H14 O7, tgt=59.21, overall=59.21 ]	(334.43805, 10014.148)(315.40527, 1096.9033)(333.08905, 10379.61)(351.1184, 952.14197)(332.3823, 7212.251)(335.1071, 953.07)(337.36557, 3746.8433)(338.05988, 643.42145)
Petunidin 3-O-glucoside	Flavonoids	105794	99717	136451	140201	140888	140598		200018	198292	289008	2992600	141840	135436		Petunidin 3-O-glucoside [ C22 H23 O12, tgt=59.62, overall=59.62 ]	(481.12405, 21758.932)(482.12576, 3755.381)(483.1348, 2626.17)(481.12354, 21348.926)(482.12616, 2603.73)(483.13916, 28757.523)(484.14185, 2715.83)(485.1433, 14534.42)(486.1447, 3036.435)(466.13098, 6710.125)(466.1311, 1259.07)(499.82455, 12197.473)(498.1564, 5957.36)(479.14706, 20795.781)(480.15765, 3909.93)
Chrysoeriol 7-O-glucoside	Flavonoids	151243	139644	161030	127942	230422	229887		1	1	219936	359614	225087	205930		Chrysoeriol 7-O-glucoside [ C22 H22 O11, tgt=57.36, overall=57.36 ]	(464.12045, 3432.48)(445.1037, 1384.64)(467.1371, 1653.2433)(480.90134, 10561.299)(482.15387, 926.612)(463.03537, 11398.841)(465.14328, 12215.887)(485.10678, 15348.913)(486.10962, 4176.56)(487.10226, 1129.4366)(469.1021, 1374.68)
Peonidin 3-O-glucoside	Flavonoids	342569	343767	391026	387332	333735	306549		569204	565133	3553567	3158254	209681	290506		Peonidin 3-O-glucoside [ C22 H23 O11, tgt=62.48, overall=62.48 ]	(467.129, 2248.655)(469.1322, 27872.35)(447.1244, 359.55)(467.1441, 2979.6152)(468.1468, 1113.35)(448.13058, 1416.2124)(484.1652, 28281.857)(482.16315, 6311.7017)(483.16675, 2314.185)(463.42215, 31057.525)(464.15207, 5925.231)(465.15472, 862.02246)(490.1269, 741.9375)(471.45035, 4957.3066)
Luteolin 7-O-diglucuronide	Flavonoids	1	1	1	1	1	1		1	1	71585	85208	1	1		Luteolin 7-O-diglucuronide [ C27 H26 O18, tgt= ]	(621.09735, 3376.375)(663.1089, 5320.8447)
Petunidin 3-O-rutinoside	Flavonoids	1	1	1	964591	1	1		484861	475219	1991282	3893702	530785	493118		Petunidin 3-O-rutinoside [ C28 H33 O16, tgt= ]	(610.3768, 971.104)(611.17944, 1984.6775)(612.1824, 532.83)(644.2175, 2127.84)(645.22577, 239.16501)(625.2, 8500.905)(626.2028, 814.7706)(648.15955, 7520.882)(649.1624, 1348.84)
Pigment A	Flavonoids	14040430	15282045	824653	12383366	11294296	10557490		238088	19477002	268806	2177444	12925175	15835924		Pigment A [ C31 H29 O13, tgt=67.48, overall=67.48 ]	(612.17474, 114200.19)(613.174, 36419.516)(614.1718, 10933.895)(615.1683, 2542.747)(591.1585, 7801.62)(592.1608, 1733.63)(610.1763, 300418.03)(611.17676, 164245.44)(592.1623, 8051.83)(593.1648, 983.75)(630.2044, 5521.498)(632.20984, 994.995)(609.1844, 6476.814)(610.18713, 788.69165)
Pelargonidin 3-O-sophoroside	Flavonoids	4028540	4092766	2063216	1818342	1987280	1897923		2009886	1959345	8362529	1431318	1949189	1885662		Pelargonidin 3-O-sophoroside [ C27 H31 O14, tgt=67.66, overall=67.66 ]	(606.6698, 2362.7)(606.1769, 958.15)(563.16345, 2299.6948)(579.1744, 20470.605)(580.17694, 4109.0576)(581.17535, 1562.915)(579.1933, 10321.015)(580.19604, 290.22)
Quercetin 3-O-acetyl-rhamnoside	Flavonoids	460312	512493	999814	788867	414930	726188		373467	5081312	9382240	9954423	423475	728899		Quercetin 3-O-acetyl-rhamnoside [ C23 H22 O7, tgt=59.46, overall=59.46 ]	(436.69006, 17563.586)(437.63513, 6004.085)(397.14026, 160610.75)(398.14398, 42922.76)(415.14844, 35272.234)(431.18057, 34675.402)(432.18362, 4531.1694)(413.9493, 29079.13)(412.9498, 7463.59)(413.1519, 1467.2867)(417.12238, 15028.612)(418.12592, 1909.2019)(419.1244, 495.85)(412.9693, 65714.66)(413.72604, 20746.807)(413.1709, 114380.33)(414.17365, 15482.649)
Petunidin 3-O-arabinoside	Flavonoids	1	1	234496	169396	1	1		570095	568934	6385685	822015	1	1		Petunidin 3-O-arabinoside [ C21 H21 O11, tgt= ]	(452.1126, 19551.19)(450.1038, 4925.33)(431.09888, 7136.3047)(453.62677, 3456.2324)(455.127, 400.85)(435.1192, 1761.11)(467.1446, 44341.98)(468.14755, 8972.528)(469.1504, 10154.45)(470.1521, 348.61)(452.56967, 5044.6)(450.137, 2706.49)(477.10663, 415.98)(455.0954, 338.73)
Baicalein	Flavonoids	3208222	2882353	4486899	4516886	4377008	4264019		1428987	1438619	268555	267569	4052571	4089228		Baicalein [ C15 H10 O5, tgt=67.89, overall=67.89 ]	(271.06104, 2871.08)(256.89294, 13216.719)(257.89502, 3221.8877)(270.27792, 1742.3949)(275.03336, 79665.484)(276.03604, 3166.908)(277.03217, 134.59)
6''-O-Malonyldaidzin	Flavonoids	151243	139261	107472	110856	139620	146303		1	1	369334	388465	147948	140083		6''-O-Malonyldaidzin [ C24 H22 O12, tgt=76.17, overall=76.17 ]	(485.10376, 19298.23)(486.10443, 5757.7563)(487.10254, 3482.2559)(503.12302, 3785.3665)(504.12283, 849.6333)(512.11, 1187.09)
Apigenin 6,8-di-C-glucoside	Flavonoids	1	1	1	1	1	1		1	1	7387521	7224469	1	1		Apigenin 6,8-di-C-glucoside [ C27 H30 O15, tgt= ]	(601.18115, 310.435)(581.1709, 432.45502)(595.91876, 13572.916)(596.1927, 1752.2657)
(-)-Epigallocatechin 3-O-gallate	Flavonoids	1	1	641184	1	1	743128		510335	493121	956254	917443	724730	1		(-)-Epigallocatechin 3-O-gallate [ C22 H18 O11, tgt= ]	(461.09207, 915.75665)(441.08002, 11058.877)(442.08228, 1924.2129)(443.07944, 654.05334)(479.13373, 750.315)(459.1182, 2866.53)(487.0886, 1687.6064)(465.22308, 7528.778)(468.07867, 1567.825)
3-Hydroxyphloretin 2'-O-glucoside	Flavonoids	6622152	7000598	3308962	3186389	3726808	3903941		1740588	4650627	4088698	4109032	3478388	2788812		3-Hydroxyphloretin 2'-O-glucoside [ C21 H24 O11, tgt=87.16, overall=87.16 ]	(453.16113, 482902.66)(454.16415, 110776.18)(455.16177, 36174.5)(456.1628, 5028.5283)
Cirsimaritin	Flavonoids	1528799	1670944	2620394	2298246	1663686	1658579		1647710	1593443	2977252	2977646	1634752	3256726		Cirsimaritin [ C17 H14 O6, tgt=65.12, overall=65.12 ]	(319.09216, 57883.746)(301.08472, 6592.4595)(318.9137, 127972.58)(320.09808, 10491.537)(300.22626, 5697.0083)(299.07916, 2101.125)(301.08435, 17995.375)(302.08722, 1063.535)(335.03308, 29652.568)(335.96, 7160.83)(336.1243, 2128.15)(316.80496, 20669.387)(318.1174, 833.48)(339.3418, 8876.447)(341.0778, 4215.9487)(321.95422, 70449.01)(324.0717, 9809.816)
Luteolin 6-C-glucoside	Flavonoids	249789	249370	230675	215000	2622886	283404		1	334054	473790	456560	283713	2489119		Luteolin 6-C-glucoside [ C21 H20 O11, tgt=36.06, overall=36.06 ]	(449.50284, 10897.802)(450.10327, 4019.9666)(431.0887, 6017.1465)(453.11728, 19191.182)(450.1039, 6817.37)(468.6817, 8908.317)(470.3949, 12968.934)(471.48074, 2940.655)(472.1489, 365.45)(450.12836, 344.56)(471.08344, 208398.22)(472.0861, 36744.01)(473.0877, 4784.0)
Tangeretin	Flavonoids	7554229	7759975	13244160	25852104	29212140	9095643		16129722	12718812	1265465	44141464	29183068	8685135		Tangeretin [ C20 H20 O7, tgt=65.64, overall=65.64 ]	(374.05533, 5094.6533)(373.78983, 702.2933)(359.04025, 898.3958)(359.1245, 1506.03)(375.33698, 34712.52)(376.88922, 4145.9277)(359.12494, 1995.9901)(390.62534, 11507.072)(391.3511, 8158.1733)(392.1604, 1551.04)(374.41452, 12975.385)(375.15164, 2276.0955)(398.97675, 9285.948)(399.83835, 2427.5188)(399.1205, 469.7)(381.1093, 20812.346)(382.11197, 2487.5776)
Peonidin 3-O-(6''-p-coumaroyl-glucoside)	Flavonoids	14040430	15282045	824653	12383366	11294296	10557490		238088	19477002	268806	2177444	12925175	15835924		Peonidin 3-O-(6''-p-coumaroyl-glucoside) [ C31 H29 O13, tgt=67.48, overall=67.48 ]	(612.17474, 114200.19)(613.174, 36419.516)(614.1718, 10933.895)(615.1683, 2542.747)(591.1585, 7801.62)(592.1608, 1733.63)(610.1763, 300418.03)(611.17676, 164245.44)(592.1623, 8051.83)(593.1648, 983.75)(630.2044, 5521.498)(632.20984, 994.995)(609.1844, 6476.814)(610.18713, 788.69165)
Isorhamnetin 3-O-rutinoside	Flavonoids	1	1	781201	782124	1	1		1	1	340692	335562	1	1		Isorhamnetin 3-O-rutinoside [ C28H32O16, tgt= ]	(648.1597, 11816.76)(649.16254, 2293.4885)(611.1783, 1939.99)(625.19977, 8998.601)(626.2026, 1050.3158)
Myricetin 3-O-rutinoside	Flavonoids	443062	1	831742	799104	1169047	1152432		914126	878588	897462	873131	1126342	1054334		Myricetin 3-O-rutinoside [ C27 H30 O17, tgt=46.71, overall=46.71 ]	(627.1448, 4454.022)(628.14844, 778.97003)(627.463, 981.89996)(649.12823, 59216.49)(650.13055, 12161.827)(651.13104, 1781.2482)(633.14087, 25407.824)(634.1413, 12244.686)(635.13904, 8106.515)(636.13855, 1783.81)
Jaceidin 4'-O-glucuronide	Flavonoids	1	1	91854	1	1	1		1	1	289974	268817	1	1		Jaceidin 4'-O-glucuronide [ C24 H24 O14, tgt=47.33, overall=47.33 ]	(523.1183, 1445.1571)(525.1336, 1836.91)(538.1155, 630.69)(555.16046, 314693.56)(556.16327, 65884.68)(557.1645, 10357.33)(537.1318, 3483.77)(539.1482, 4448.0464)(540.1516, 580.36)
6''-O-Acetyldaidzin	Flavonoids	1	1	76342	645271	81089	77245		878459	830058	3093056	2985278	74439	1		6''-O-Acetyldaidzin [ C23 H22 O10, tgt= ]	(460.7959, 17838.137)(461.88635, 10043.667)(462.80508, 1703.5367)(441.51196, 10983.206)(442.1114, 1646.8225)(461.1319, 4939.6084)(462.13672, 1268.0199)(443.1209, 1192.6082)(445.1353, 1344.96)(476.82565, 1732.7949)(460.26004, 3647.861)(459.15033, 1223.9724)(485.11838, 1374.76)(467.10767, 8013.4834)(468.11078, 2311.245)
Pelargonidin 3-O-galactoside	Flavonoids	1	1	1	1	1	1		1	1	1	1	1	1		Pelargonidin 3-O-galactoside [ C21H21O10, tgt= ]	(417.61002, 3433.2961)(457.15942, 11876.034)(433.13968, 27746.65)(434.14258, 3458.6475)
Kaempferol 3-O-glucosyl-rhamnosyl-galactoside	Flavonoids	1	1	488203	586087	342506	1		1	1	1	1	1	1		Kaempferol 3-O-glucosyl-rhamnosyl-galactoside [ C33 H40 O20, tgt= ]	(758.2094, 10120.843)(759.2099, 6153.0767)
Kaempferol 3-O-acetyl-glucoside	Flavonoids	1	1	1	1	1	1		1	1	1	107581	1	1		Kaempferol 3-O-acetyl-glucoside [ C23 H22 O12, tgt= ]	(492.1167, 6503.71)(491.12463, 492.77002)(493.1443, 14476.93)(497.0999, 4105.71)
Petunidin 3-O-galactoside	Flavonoids	1	1	1	1	1	1		1	1	1	2992600	1	1		Petunidin 3-O-galactoside [ C22H23O12, tgt= ]	(481.1225, 1091.83)(465.128, 10992.08)(466.1311, 1259.07)(497.1536, 34481.56)(498.1564, 5957.36)(479.1444, 48121.64)(480.1471, 7369.86)
Neodiosmin	Flavonoids	6232824	6836181	3169775	3140819	2175634	2095850		1947300	8715749	1	1	2180470	2084860		Neodiosmin [ C28 H32 O15, tgt=30.76, overall=30.76 ]	(609.6351, 163250.36)(611.0118, 163771.64)(612.1756, 183707.48)(591.1603, 34402.168)(592.1623, 6808.0337)(593.1652, 2064.1226)(611.1795, 446.1)(615.1941, 698.98)(593.1749, 4645.52)(594.173, 443.24)(611.1975, 1824.92)(615.1676, 1580.67)
Petunidin 3-O-(6''-acetyl-galactoside)	Flavonoids	1	327584	1	1	305932	1		390289	405058	1	1	271106	321128		Petunidin 3-O-(6''-acetyl-galactoside) [ C24 H25 O13, tgt= ]	(539.15576, 16837.652)(540.1537, 4099.3037)(544.1109, 710.62)
Isorhamnetin 4'-O-glucoside	Flavonoids	700961	700094	928566	116674	108103	100626		1343564	1341834	1	1473651	111740	101803		Isorhamnetin 4'-O-glucoside [ C22 H22 O12, tgt=36.70, overall=36.70 ]	(481.12357, 16919.297)(482.1257, 3955.6182)(481.1242, 1769.2621)(479.1353, 4453.6943)
Chrysoeriol 7-O-(6''-malonyl-apiosyl-glucoside)	Flavonoids	1	1	1	1	1	1		1	1	1	1	1	1		Chrysoeriol 7-O-(6''-malonyl-apiosyl-glucoside) [ C30 H32 O18, tgt= ]	(703.14374, 10962.91)(704.1462, 2156.664)(691.14484, 806.2767)
Diosmin	Flavonoids	6232824	6836181	3169775	3140819	2175634	2095850		1947300	8715749	1	1	2180470	2084860		Diosmin [ C28 H32 O15, tgt=30.76, overall=30.76 ]	(609.6351, 163250.36)(611.0118, 163771.64)(612.1756, 183707.48)(591.1603, 34402.168)(592.1623, 6808.0337)(593.1652, 2064.1226)(611.1795, 446.1)(615.1941, 698.98)(593.1749, 4645.52)(594.173, 443.24)(611.1975, 1824.92)(615.1676, 1580.67)
3-Hydroxyphloretin 2'-O-xylosyl-glucoside	Flavonoids	238182	249071	7284391	305133	165145	180294		145306	136037	1	12621391	3526363	161021		3-Hydroxyphloretin 2'-O-xylosyl-glucoside [ C26 H32 O15, tgt=39.61, overall=39.61 ]	(587.9134, 32822.816)(589.3139, 7823.4897)(588.5129, 2646.1165)(591.1954, 60824.625)(572.72614, 11601.551)(572.52496, 30240.523)(573.1907, 48975.703)(605.2102, 15223.266)(606.21313, 2830.4683)(585.2055, 3849.83)(608.92334, 2512.0273)(612.1818, 1166.9)
Delphinidin 3-O-feruloyl-glucoside	Flavonoids	1	1	1	1	1	1		1	79489	1	1	76516	1		Delphinidin 3-O-feruloyl-glucoside [ C31 H29 O15, tgt= ]	(627.1456, 1907.52)(628.1488, 394.02)(649.12854, 21965.705)(650.131, 4443.2354)
Theaflavin 3'-O-gallate	Flavonoids	1	1	1	1	1	1		1	1	1	1	1	1		Theaflavin 3'-O-gallate [ C36 H28 O16, tgt= ]	(716.14575, 4203.0415)(721.15717, 2619.565)(703.14386, 10443.317)(704.1462, 2245.6199)
Isorhamnetin 3-O-glucoside	Flavonoids	700961	700094	928566	116674	108103	100626		1343564	1341834	1	1473651	111740	101803		Isorhamnetin 3-O-glucoside [ C22 H22 O12, tgt=36.70, overall=36.70 ]	(481.12357, 16919.297)(482.1257, 3955.6182)(481.1242, 1769.2621)(479.1353, 4453.6943)
Delphinidin 3-O-galactoside	Flavonoids	1	1	240943	224973	145705	160462		323800	310867	1	1	146281	141200		Delphinidin 3-O-galactoside [ C21 H21 O12, tgt= ]	(469.12357, 3377.68)(483.1391, 13092.517)(484.14197, 1263.352)(485.13733, 1249.14)(468.63983, 26663.566)
Luteolin 7-O-(2-apiosyl-glucoside)	Flavonoids	1	1	1	1	1	1		1	1	1	1	1	1		Luteolin 7-O-(2-apiosyl-glucoside) [ C26 H28 O15, tgt= ]
Peonidin 3-O-galactoside	Flavonoids	342569	343767	391026	387332	1	306549		569204	565133	1	1	1	1		Peonidin 3-O-galactoside [ C22 H23 O11, tgt=62.48, overall=62.48 ]	(447.1244, 359.55)(467.1437, 2663.03)(447.1269, 686.555)(487.1703, 18013.479)(463.14935, 36093.426)(464.15207, 6039.3516)(465.15472, 862.02246)(491.12564, 349.9)(471.11768, 6699.173)
Malvidin 3-O-(6''-acetyl-galactoside)	Flavonoids	8381458	8573857	7320307	7128868	8045005	6102789		10111321	10336192	1	1	7803068	8656438		Malvidin 3-O-(6''-acetyl-galactoside) [ C25 H27 O13, tgt=38.42, overall=38.42 ]	(538.15656, 50436.25)(539.1559, 12610.786)(540.15375, 3048.6016)(536.15796, 171615.39)(537.1584, 74032.375)
Eriodictyol	Flavonoids	1098042	629723	917134	942427	573801	925778		702414	695280	1	1352449	602960	704992		Eriodictyol [ C15 H12 O6, tgt=47.51, overall=47.51 ]	(293.07626, 1442.9634)(275.0674, 354.54)(290.98297, 28930.828)(291.9149, 3348.6458)(293.07748, 2291.1074)(275.0686, 1981.4528)(306.0952, 960.3329)(307.0862, 2517.64)(290.42688, 5052.52)(316.0647, 593.93994)(297.0529, 1054.454)
Peonidin 3-O-(6''-acetyl-galactoside)	Flavonoids	356815	305343	692386	1	1	1		1	1	1	1	1	156678		Peonidin 3-O-(6''-acetyl-galactoside) [ C24 H25 O12, tgt=17.61, overall=17.61 ]	(507.1342, 4559.61)(525.1744, 550.27)(507.66953, 6895.7397)(508.17334, 799.47003)(528.1241, 2800.11)(515.1198, 2189.38)
Kaempferol 3-O-xylosyl-rutinoside	Flavonoids	176029	192273	175722	1	1	279516		1	1	1	100130	267209	1		Kaempferol 3-O-xylosyl-rutinoside [ C32 H38 O19, tgt=16.06, overall=16.06 ]	(708.1989, 13107.626)(709.2, 2355.1882)
Isorhamnetin 3-O-galactoside	Flavonoids	700961	700094	928566	116674	108103	100626		1343564	1341834	1	1473651	111740	101803		Isorhamnetin 3-O-galactoside [ C22 H22 O12, tgt=36.70, overall=36.70 ]	(481.12357, 16919.297)(482.1257, 3955.6182)(481.1242, 1769.2621)(479.1353, 4453.6943)
Delphinidin 3-O-(6''-acetyl-galactoside)	Flavonoids	1	1	1	1	1	1		1	1	1	1	1	1		Delphinidin 3-O-(6''-acetyl-galactoside) [ C23 H23 O13, tgt= ]	(533.1161, 87241.61)(534.11804, 11844.145)
5,4'-Dihydroxy-3,3'-dimethoxy-6:7-methylenedioxyflavone 4'-O-glucuronide	Flavonoids	1	1	1	1	1	1		1	1	1	1	1	1		5,4'-Dihydroxy-3,3'-dimethoxy-6:7-methylenedioxyflavone 4'-O-glucuronide [ C24 H22 O14, tgt= ]	(538.9125, 991.19403)(553.1346, 4332.5)(534.1176, 9879.373)(557.0853, 5551.17)(558.08594, 1223.0651)(559.083, 390.77002)(544.09863, 1379.4026)
Cyanidin 3-O-(6''-acetyl-galactoside)	Flavonoids	130421	1	282705	1	1	1		1	1	1	1	1	1		Cyanidin 3-O-(6''-acetyl-galactoside) [ C23 H23 O12, tgt=11.66, overall=11.66 ]	(479.1341, 1842.335)(493.1296, 4514.75)(501.1173, 555.305)
Cyanidin 3-O-(6''-malonyl-3''-glucosyl-glucoside)	Flavonoids	1	1	1	1	1	1		1	1	1	1	1	1		Cyanidin 3-O-(6''-malonyl-3''-glucosyl-glucoside) [ C30 H33 O19, tgt= ]	(681.1551, 3957.065)(721.155, 1754.52)(699.17487, 16157.901)(700.17694, 4240.0195)(703.1418, 7722.8003)(704.1425, 2099.5774)
Luteolin 7-O-malonyl-glucoside	Flavonoids	1	1	1	1	1	1		1	1	1	1	1	1		Luteolin 7-O-malonyl-glucoside [ C24 H22 O14, tgt= ]	(539.1142, 1002.09)(534.1176, 9879.373)(557.0853, 5551.17)(558.08594, 1223.0651)(559.083, 390.77002)(544.09863, 1379.4026)
Theaflavin	Flavonoids	1	1	1	1	1	1		1	1	1	1	1	1		Theaflavin [ C29 H24 O12, tgt= ]	(571.15094, 2636.7468)(553.13855, 3615.2937)(585.1688, 940.3825)(565.146, 13860.815)(566.14905, 3164.275)(569.10675, 4738.15)
Theaflavin 3-O-gallate	Flavonoids	1	1	1	1	1	1		1	1	1	1	1	1		Theaflavin 3-O-gallate [ C36 H28 O16, tgt= ]	(716.14575, 4203.0415)(721.15717, 2619.565)(703.14386, 10443.317)(704.1462, 2245.6199)
6-Prenylnaringenin	Flavonoids	1	1	6606715	6526107	5008332	4915142		6809431	6796723	1	12386957	4993002	4799719		6-Prenylnaringenin [ C20H20O5, tgt= ]	(345.1431, 244.83)(327.13623, 33614.562)(326.22617, 669625.4)(327.684, 465043.62)(328.1396, 110419.79)(361.1758, 7151.227)(362.17975, 3871.3213)(363.1792, 542.43335)(343.16547, 1418.7445)(367.12958, 37776.562)(368.1329, 14939.109)(345.31183, 17147.203)(346.1138, 2095.2524)
Malvidin 3-O-galactoside	Flavonoids	1	1	1	1	1	1		1	1	1	1	1	1		Malvidin 3-O-galactoside [ C23H25O12, tgt= ]	(493.13037, 3021.0)(497.15472, 2368.565)(495.5633, 32883.043)(494.16296, 8222.757)(519.13293, 628.435)
Malvidin 3-O-(6''-caffeoyl-glucoside)	Flavonoids	1	1	1	1	1	1		1	1	1	1	1	1		Malvidin 3-O-(6''-caffeoyl-glucoside) [ C32 H31 O15, tgt= ]
Cyanidin 3-O-xylosyl-rutinoside	Flavonoids	1	1	1	1	1	1		1	1	1	1	1	1		Cyanidin 3-O-xylosyl-rutinoside [ C32 H39 O19, tgt= ]	(733.1835, 13582.572)(734.18616, 2678.458)(735.19745, 781.58)
Myricetin 3-O-galactoside	Flavonoids	1	1	1	1	1	1		149151	129535	1	1	1	1		Myricetin 3-O-galactoside [ C21H20O13, tgt= ]	(481.0923, 1217.3999)(499.1341, 19776.064)(500.13672, 2718.49)(481.121, 1221.05)
Delphinidin 3-O-sambubioside	Flavonoids	1	1	1	1	1	1		1	1	1	1	1	1		Delphinidin 3-O-sambubioside [ C26 H29 O16, tgt= ]
Naringin 6'-malonate	Flavonoids	1	1	147277	1	1	1		1	1	1	248970	1	1		Naringin 6'-malonate [ C30 H34 O17, tgt= ]	(648.1599, 17512.846)(649.16254, 2786.6133)(666.21204, 6880.26)(667.211, 2031.69)
Quercetin 3-O-xylosyl-rutinoside	Flavonoids	1	1	1	1	1	1		1	1	1	1	1	1		Quercetin 3-O-xylosyl-rutinoside [ C32 H38 O20, tgt= ]	(743.188, 755.68)(725.17847, 14682.305)(726.18097, 2493.1074)
Petunidin 3-O-(6''-p-coumaroyl-glucoside)	Flavonoids	561430	1	1107686	1	1	1		1	1	1	139630	1	1		Petunidin 3-O-(6''-p-coumaroyl-glucoside) [ C31 H29 O14, tgt=5.33, overall=5.33 ]	(625.16284, 2265.775)(611.15063, 29884.656)(612.15356, 7860.0596)(613.15564, 344.335)(628.6782, 238.375)(627.1925, 1051.415)(633.53564, 366109.6)(634.1369, 124676.68)
Pinotin A	Flavonoids	561430	1	1107686	1	1	1		1	1	1	139630	1	1		Pinotin A [ C31 H29 O14, tgt=5.33, overall=5.33 ]	(625.16284, 2265.775)(611.15063, 29884.656)(612.15356, 7860.0596)(613.15564, 344.335)(628.6782, 238.375)(627.1925, 1051.415)(633.53564, 366109.6)(634.1369, 124676.68)
Kaempferol 3-O-xylosyl-glucoside	Flavonoids	1	1	1	1	1	1		1	1	1	1	1	1		Kaempferol 3-O-xylosyl-glucoside [ C26 H28 O15, tgt= ]
luteolina-7-glucoside	Flavonoids	249789	249370	230675	215000	2622886	283404		1	334054	473790	456560	283713	2489119		luteolina-7-glucoside [ C21 H20 O11, tgt=36.06, overall=36.06 ]	(449.50284, 10897.802)(450.10327, 4019.9666)(431.0887, 6017.1465)(453.11728, 19191.182)(450.1039, 6817.37)(468.6817, 8908.317)(470.3949, 12968.934)(471.48074, 2940.655)(472.1489, 365.45)(450.12836, 344.56)(471.08344, 208398.22)(472.0861, 36744.01)(473.0877, 4784.0)
Quercetin 3-O-(6	Flavonoids	421517	428870	856148	844306	544399	526224		2043760	2008416	8265346	8115205	518282	499711		Quercetin 3-O-(6 [ C24 H22 O10, tgt=65.08, overall=65.08 ]	(470.12668, 1863.0376)(574.74194, 11238.024)(520.5439, 4133.6963)(457.1284, 1161.1)(475.14255, 5810.935)(580.38116, 105677.19)(581.383, 32701.553)(582.3842, 4139.5464)(489.1656, 3813.55)(471.14697, 24489.684)(472.1494, 3571.7656)(475.1621, 1611.1133)(499.12155, 440.58)
Kaempferol 3-O-(6	Flavonoids	1	1	1	1	1	1		1	1	1	1	1	1		Kaempferol 3-O-(6 [ C24 H22 O14, tgt= ]	(539.1142, 1002.09)(534.1176, 9879.373)(557.0853, 5551.17)(558.08594, 1223.0651)(559.083, 390.77002)(544.09863, 1379.4026)
ProcyanidinB23'-O-gallate	Flavonoids	1	1	1	1	1	1		1	1	1	1	1	1		ProcyanidinB23'-O-gallate [ C37 H30 O16, tgt= ]	(733.18365, 14048.76)(734.18634, 3130.2617)
Cyanidin 3-O-sambubiosyl 5-O-glucoside	Flavonoids	1	1	1	1	1	1		1	1	1	1	1	1		Cyanidin 3-O-sambubiosyl 5-O-glucoside [ C32 H39 O20, tgt= ]
Todolactol A	Lignans	8562629	8928248	13829287	13533687	10612852	11115753		12236657	12202309	18136944	17458626	10877934	10939645		Todolactol A [ C20 H23 O7, tgt=47.53, overall=47.53 ]	(361.14032, 35531.81)(362.14316, 5122.248)(363.1551, 988.79)(393.1829, 624445.56)(394.18594, 110783.98)(395.19147, 23002.273)(396.19653, 1944.59)(377.17178, 35895.547)(378.17422, 3905.5347)(402.2641, 56552.598)(385.1401, 50163.902)
Isohydroxymatairesinol	Lignans	5595003	5730779	10044521	9781342	6863544	6899984		40075472	40237544	12663499	13055856	7055808	6805467		Isohydroxymatairesinol [ C20 H22 O7, tgt=56.45, overall=56.45 ]	(401.1341, 31007.684)(402.138, 5493.068)(361.14038, 44452.316)(362.14328, 5768.2617)(374.35507, 8054.9375)(375.124, 1374.1556)(375.1454, 788.28)(383.1238, 31039.092)(384.12686, 3640.515)(377.17175, 32562.96)(378.17398, 3906.8923)
Medioresinol	Lignans	20929750	22115448	11369518	29311104	28222268	34014136		17557322	39635784	64369768	64826644	27876744	33138804		Medioresinol [ C21 H24 O7, tgt=69.13, overall=69.13 ]	(389.24646, 2994.0273)(392.16052, 304.195)(373.5482, 16212.773)(372.14465, 4039.8076)(375.156, 8816.09)(389.9639, 35481.246)(390.16193, 9201.346)(391.1507, 11660.35)(374.42776, 18408.418)(375.01392, 1901.8958)(391.4585, 2444.3486)(392.18564, 914.23004)(415.1948, 48696.7)(416.15247, 6306.746)(396.8895, 189771.75)(398.0435, 48164.92)(398.1432, 16347.695)
7-Hydroxysecoisolariciresinol	Lignans	10928652	2383856	4382195	3649203	3137228	3011011		4488611	5119087	14784239	14300865	2469196	2336426		7-Hydroxysecoisolariciresinol [ C20 H26 O7, tgt=62.92, overall=62.92 ]	(381.1811, 2564.015)(360.162, 3847.54)(363.1758, 1930.94)(396.2018, 575488.44)(397.20355, 82885.3)(398.2051, 6529.451)(404.76425, 34087.57)(402.1539, 18914.76)(403.1553, 2244.38)(387.15582, 108096.88)(388.1593, 15280.001)
Lariciresinol-sesquilignan	Lignans	15891456	1287306	1	22750540	18253512	18252872		20058110	20038242	1576482	1608789	18571944	18016760		Lariciresinol-sesquilignan [ C30 H37 O10, tgt=19.36, overall=19.36 ]	(558.0466, 960.3779)(543.51483, 6546.3896)(543.7906, 1772.4988)(558.2494, 3933.0718)(559.2553, 471.13998)(581.2809, 2083.26)(559.26263, 20621.664)(560.26587, 2878.875)(580.22705, 41082.48)(581.22894, 11164.445)
Dimethylmatairesinol	Lignans	21256780	41372168	5396052	4192866	45741724	30743408		41944608	6060988	6625629	6353377	31407588	30776292		Dimethylmatairesinol [ C22 H26 O6, tgt=60.64, overall=60.64 ]	(373.17416, 27736.926)(413.17203, 185371.38)(414.17447, 26167.805)(373.1766, 63192.38)(374.1792, 21481.29)(408.2155, 326.58)(391.18646, 6087.84)(394.55942, 4962.11)(388.8727, 5472.2866)(390.21246, 907.56506)
Lariciresinol	Lignans	1011949	855914	1862470	1952552	1207690	1194215		2033892	1534781	2654849	2606973	1208505	920631		Lariciresinol [ C20 H24 O6, tgt=60.18, overall=60.18 ]	(360.16086, 1796.3539)(347.1603, 3747.377)(345.66217, 5990.43)(348.1645, 1104.49)(378.1862, 146.1)(387.10553, 100240.61)(388.09973, 13935.4795)(369.14526, 55684.457)(370.14957, 12205.457)
Arctigenin	Lignans	23705200	23961024	57521968	38324524	43359376	43528656		36334576	36296488	90082408	89687640	42679736	41969112		Arctigenin [ C21 H24 O6, tgt=60.94, overall=60.94 ]	(374.83252, 5928.865)(359.15952, 17199.268)(359.1606, 42982.434)(360.1639, 24327.44)(393.3278, 7149.019)(394.20605, 1555.4551)(375.68994, 83793.97)(375.6889, 65714.97)(398.33514, 39591.742)(399.8414, 8734.768)(380.9456, 62590.156)(382.1489, 10807.475)
7-Oxomatairesinol	Lignans	8245802	8296252	15849621	15932269	9945022	9756097		11979394	11782222	25550114	909582	11985725	9341530		7-Oxomatairesinol [ C20 H21 O7, tgt=49.00, overall=49.00 ]	(374.0076, 44821.516)(374.13562, 10387.68)(359.12488, 1949.5734)(374.76532, 10151.362)(375.14996, 3382.27)(361.14014, 6593.028)(391.99487, 3305.5967)(375.15558, 30539.846)(376.15903, 3053.3884)(401.02612, 19348.717)(401.1349, 5247.11)(383.12274, 6832.614)
7-Hydroxymatairesinol	Lignans	5595003	5730779	10044521	9781342	6863544	6899984		40075472	40237544	12663499	13055856	7055808	6805467		7-Hydroxymatairesinol [ C20 H22 O7, tgt=56.45, overall=56.45 ]	(401.1341, 31007.684)(402.138, 5493.068)(361.14038, 44452.316)(362.14328, 5768.2617)(374.35507, 8054.9375)(375.124, 1374.1556)(375.1454, 788.28)(383.1238, 31039.092)(384.12686, 3640.515)(377.17175, 32562.96)(378.17398, 3906.8923)
Episesamin	Lignans	5360401	5547210	10666938	8499149	6629150	6172435		11168314	6871204	16636667	15870352	6685852	7976758		Episesamin [ C20 H18 O6, tgt=64.83, overall=64.83 ]	(358.9561, 719.47)(341.11157, 8674.243)(359.1251, 1771.5898)(340.96405, 18790.209)(341.9506, 5268.862)(375.15393, 17514.922)(376.15878, 3884.0874)(356.3572, 529620.1)(357.32587, 248283.81)(357.44797, 653290.44)(380.8471, 15812.825)(382.1118, 2422.3586)
Sesamolinol	Lignans	7554229	7759975	13244160	25852104	29212140	9095643		16129722	12718812	1265465	44141464	29183068	8685135		Sesamolinol [ C20 H20 O7, tgt=65.64, overall=65.64 ]	(374.05533, 5094.6533)(373.78983, 702.2933)(359.04025, 898.3958)(359.1245, 1506.03)(375.33698, 34712.52)(376.88922, 4145.9277)(359.12494, 1995.9901)(390.62534, 11507.072)(391.3511, 8158.1733)(392.1604, 1551.04)(374.41452, 12975.385)(375.15164, 2276.0955)(398.97675, 9285.948)(399.83835, 2427.5188)(399.1205, 469.7)(381.1093, 20812.346)(382.11197, 2487.5776)
Sesamol	Lignans	5180046	5322186	4224623	4361593	8497433	8755886		8061789	8177397	4489673	2887000	7660762	7334138		Sesamol [ C7 H6 O3, tgt=83.74, overall=83.74 ]	(139.03598, 1940.9086)(124.037285, 13273.881)(125.04055, 636.91003)(157.06906, 4455.381)(138.05336, 1294052.2)(139.34247, 56505.934)(140.05733, 8592.465)(146.2686, 8798.971)(147.02113, 7262.0103)
Episesaminol	Lignans	416844	408086	1314059	1022891	1008045	973284		1449300	110647	1476877	1294714	1002629	898144		Episesaminol [ C20 H18 O7, tgt=58.67, overall=58.67 ]	(371.10995, 23622.537)(372.1088, 1699.0016)(354.59946, 953.3025)(372.11774, 11935.217)(372.1123, 856.375)(357.11057, 2344.8984)(390.77292, 1767.24)(373.2626, 49936.086)(374.14047, 6365.8154)(395.84885, 1071.1191)(378.8067, 16327.961)(379.91434, 173701.98)(380.0982, 152255.69)
Isolariciresinol	Lignans	1011949	855914	1862470	1952552	1207690	1194215		2033892	1534781	2654849	2606973	1208505	920631		Isolariciresinol [ C20 H24 O6, tgt=60.18, overall=60.18 ]	(360.16086, 1796.3539)(347.15985, 621.54004)(344.1625, 174.16)(387.1557, 111087.85)(388.15872, 14650.039)(369.1452, 64457.07)(370.15005, 18637.336)
Sesamin	Lignans	5360401	5547210	10666938	8499149	6629150	6172435		11168314	6871204	16636667	15870352	6685852	7976758		Sesamin [ C20 H18 O6, tgt=64.83, overall=64.83 ]	(358.9561, 719.47)(341.11157, 8674.243)(359.1251, 1771.5898)(340.96405, 18790.209)(341.9506, 5268.862)(375.15393, 17514.922)(376.15878, 3884.0874)(356.3572, 529620.1)(357.32587, 248283.81)(357.44797, 653290.44)(380.8471, 15812.825)(382.1118, 2422.3586)
Conidendrin	Lignans	5630463	5767205	10018224	9801995	964329	939053		1288101	8707473	12926844	12754678	1023599	1039047		Conidendrin [ C20 H20 O6, tgt=56.45, overall=56.45 ]	(358.27615, 400.0257)(343.13077, 133862.58)(361.01553, 36457.695)(362.14285, 6082.025)(342.83722, 74948.25)(344.1335, 13859.684)(377.17154, 26529.225)(378.17416, 6149.56)(357.9791, 213152.6)(358.98395, 53727.72)(359.90945, 23544.662)(360.165, 19409.54)(382.06845, 24447.213)(384.12674, 7133.1216)(364.78012, 14396.293)(365.1113, 24568.47)
Cyclolariciresinol	Lignans	1011949	855914	1862470	1952552	1207690	1194215		2033892	1534781	2654849	2606973	1208505	920631		Cyclolariciresinol [ C20 H24 O6, tgt=60.18, overall=60.18 ]	(360.16086, 1796.3539)(347.1603, 3747.377)(345.66217, 5990.43)(348.1645, 1104.49)(378.1862, 146.1)(387.10553, 100240.61)(388.09973, 13935.4795)(369.14526, 55684.457)(370.14957, 12205.457)
Pinoresinol	Lignans	1608781	3661482	6417694	5961981	2745040	2684902		9387009	8628486	16558319	16354932	2779173	2645328		Pinoresinol [ C20 H22 O6, tgt=55.27, overall=55.27 ]	(362.48703, 3564.4736)(360.1432, 315.18)(344.8928, 6673.791)(345.1445, 7596.3)(359.1529, 2447.64)(377.5132, 2054.0598)(378.1865, 226.73502)(361.1762, 10552.24)(362.17953, 5320.489)(363.17908, 972.23)(385.1404, 56539.973)(386.1433, 6258.8696)(367.1299, 22842.88)(368.13184, 5638.891)
Sesaminol	Lignans	416844	408086	1314059	1022891	1008045	973284		1449300	110647	1476877	1294714	1002629	898144		Sesaminol [ C20 H18 O7, tgt=58.67, overall=58.67 ]	(371.10995, 23622.537)(372.1088, 1699.0016)(354.59946, 953.3025)(372.11774, 11935.217)(372.1123, 856.375)(357.11057, 2344.8984)(390.77292, 1767.24)(373.2626, 49936.086)(374.14047, 6365.8154)(395.84885, 1071.1191)(378.8067, 16327.961)(379.91434, 173701.98)(380.0982, 152255.69)
Syringaresinol	Lignans	13974177	14361261	5623877	5612783	4538972	4503028		4280462	6414280	5043907	5305735	4605136	4370960		Syringaresinol [ C22 H26 O8, tgt=68.51, overall=68.51 ]	(418.16705, 4189.327)(402.65805, 201932.9)(402.15533, 76513.766)(403.15607, 22216.121)(404.1579, 1106.655)(419.1692, 12643.76)(420.17184, 2049.335)(404.9437, 10577.656)(405.50037, 2783.0898)(436.1979, 181.76)(421.195, 244.15)(443.0377, 13894.9375)(442.55185, 2161.563)(443.14423, 3207.2578)(426.74063, 23357.748)(427.8593, 5353.2104)(427.48547, 40277.727)(428.15448, 9350.096)
Nortrachelogenin	Lignans	5595003	5730779	10044521	9781342	6863544	6899984		40075472	40237544	12663499	13055856	7055808	6805467		Nortrachelogenin [ C20 H22 O7, tgt=56.45, overall=56.45 ]	(401.1341, 31007.684)(402.138, 5493.068)(361.14038, 44452.316)(362.14328, 5768.2617)(374.35507, 8054.9375)(375.124, 1374.1556)(375.1454, 788.28)(383.1238, 31039.092)(384.12686, 3640.515)(377.17175, 32562.96)(378.17398, 3906.8923)
Secoisolariciresinol-sesquilignan	Lignans	694359	752267	1	656747	1799440	106009		107146	111597	1336815	1346004	106737	1786489		Secoisolariciresinol-sesquilignan [ C30 H38 O9, tgt=33.30, overall=33.30 ]	(525.85516, 42698.812)(526.2406, 13308.52)(527.25195, 14902.913)(528.25525, 3359.5503)(530.256, 319.5)(563.2944, 473.93)(545.284, 423.87)
Trachelogenin	Lignans	20929750	22115448	11369518	29311104	28222268	34014136		17557322	39635784	64369768	64826644	27876744	33138804		Trachelogenin [ C21 H24 O7, tgt=69.13, overall=69.13 ]	(389.24646, 2994.0273)(392.16052, 304.195)(373.5482, 16212.773)(372.14465, 4039.8076)(375.156, 8816.09)(389.9639, 35481.246)(390.16193, 9201.346)(391.1507, 11660.35)(374.42776, 18408.418)(375.01392, 1901.8958)(391.4585, 2444.3486)(392.18564, 914.23004)(415.1948, 48696.7)(416.15247, 6306.746)(396.8895, 189771.75)(398.0435, 48164.92)(398.1432, 16347.695)
Anhydro-secoisolariciresinol	Lignans	208073	208295	859122	859725	272902	254827		890251	886751	970161	946607	331456	244463		Anhydro-secoisolariciresinol [ C20 H24 O5, tgt=74.48, overall=74.48 ]	(347.16977, 23439.428)(345.83218, 5195.5566)(331.16684, 11975.381)(371.22418, 87947.84)(372.16434, 11273.337)(352.53372, 18013.877)(353.35156, 1394.325)
Sesamolin	Lignans	416844	408086	1314059	1022891	1008045	973284		1449300	1	1476877	1294714	1002629	898144		Sesamolin [ C20 H18 O7, tgt=58.67, overall=58.67 ]	(371.10995, 23622.537)(372.1088, 1699.0016)(354.59946, 953.3025)(372.11774, 11935.217)(372.1123, 856.375)(357.11057, 2344.8984)(391.14914, 1752.2472)(373.27072, 53012.668)(374.14047, 6365.8154)(395.84885, 1071.1191)(378.79236, 13669.766)(379.89606, 190246.3)(380.0982, 152255.69)
Matairesinol	Lignans	1608781	3661482	6417694	5961981	2745040	2684902		9387009	8628486	16558319	16354932	2779173	2645328		Matairesinol [ C20 H22 O6, tgt=55.27, overall=55.27 ]	(362.48703, 3564.4736)(360.1432, 315.18)(344.8928, 6673.791)(345.1445, 7596.3)(359.1529, 2447.64)(377.5132, 2054.0598)(378.1865, 226.73502)(361.1762, 10552.24)(362.17953, 5320.489)(363.17908, 972.23)(385.1404, 56539.973)(386.1433, 6258.8696)(367.1299, 22842.88)(368.13184, 5638.891)
Secoisolariciresinol	Lignans	493451	494695	866483	850248	1298055	620814		1720089	1713996	3915244	3766432	1137890	1258516		Secoisolariciresinol [ C20 H26 O6, tgt=68.33, overall=68.33 ]	(363.17447, 543.252)(347.63358, 4355.796)(345.1662, 2480.59)(348.17624, 15592.828)(350.18042, 2144.82)(384.21616, 1664.965)(385.2171, 332.608)(366.20566, 649.4175)(389.17062, 15008.605)(390.1746, 2836.4814)(371.16165, 324070.34)(372.16464, 46325.52)
1-Acetoxypinoresinol	Lignans	5202923	1066330	8112025	869352	878977	1217617		6505552	730833	1	14861831	1810534	815253		1-Acetoxypinoresinol [ C22 H24 O8, tgt=62.29, overall=62.29 ]	(416.60623, 7185.394)(419.15262, 3477.673)(400.13983, 33892.668)(417.53088, 8846.657)(419.6541, 2645.865)(422.16248, 3953.02)(402.65155, 11117.908)(404.153, 1085.56)(419.23364, 22102.332)(420.62775, 7622.04)(421.18506, 1529.3)(441.8093, 14476.466)(441.476, 3442.4531)(443.14633, 5987.3003)(424.35583, 88913.07)(425.907, 111157.11)(426.13867, 70556.945)
Ligstroside	Other polyphenols	671913	264076	1200796	1237096	432269	1072944		839045	825865	1516100	1495025	665639	387120		Ligstroside [ C25 H32 O12, tgt=71.00, overall=71.00 ]	(508.1797, 1520.495)(549.18585, 95635.47)(550.1884, 19171.24)(551.1904, 2632.4014)(542.7756, 6406.04)(527.19977, 686.49664)(529.2152, 2360.71)(531.17456, 1103.1299)(525.2212, 4270.7876)(526.225, 686.425)
Psoralen	Other polyphenols	452179	491381	415671	243701	188561	173345		343381	301329	284997	433848	177439	218629		Psoralen [ C11 H6 O3, tgt=47.15, overall=47.15 ]	(186.0321, 388.315)(187.02756, 555.5)(171.02719, 2201.0522)(190.04675, 3348.5225)(191.0493, 646.73)(173.0401, 4607.388)(187.45953, 6478.341)(209.02055, 655.922)(191.01013, 8537.305)
4-Vinylsyringol	Other polyphenols	1244214	1420049	3698432	2844258	863752	3305290		918354	854962	657906	540172	3410459	701598		4-Vinylsyringol [ C10 H12 O3, tgt=95.17, overall=95.17 ]	(181.08037, 27947.559)(182.08376, 2660.768)(164.0708, 4624.07)(184.09384, 2650.54)(166.08406, 331713.22)(167.08713, 28004.107)(168.08913, 1704.5155)(180.0992, 14316.773)(181.0945, 1165.92)(187.53912, 7984.5215)(188.40092, 73408.27)(189.82254, 4254.735)(190.073, 629.99)
Umbelliferone	Other polyphenols	1	1068663	1260155	985355	4778381	4673096		7879601	20865798	9749671	2571942	4668180	4530295		Umbelliferone [ C9 H6 O3, tgt=45.77, overall=45.77 ]	(164.37206, 97710.375)(164.0387, 1070.12)(146.02745, 3756.605)(163.03676, 346136.12)(164.03972, 23989.178)(165.04266, 2676.88)(145.42975, 2816.8782)(167.06714, 760.3167)(170.02061, 10483.094)
3,4-Dihydroxyphenylglycol	Other polyphenols	817827	616489	596549	557636	670264	659275		1051683	1027086	2868908	2832428	627213	637645		3,4-Dihydroxyphenylglycol [ C8 H10 O4, tgt=58.38, overall=58.38 ]	(170.34389, 40544.59)(171.06049, 4556.4517)(172.0621, 283.26)(174.0732, 20482.338)(156.06445, 873.345)(189.59435, 3371.5173)(189.09595, 514.055)(170.07935, 6197.5938)(196.0557, 4600.09)(179.8839, 4079.7302)
Bisdemethoxycurcumin	Other polyphenols	584866	1406925	1988639	2326348	1487122	1484429		2944408	2570123	5145011	1	1934349	1847257		Bisdemethoxycurcumin [ C19 H16 O4, tgt=55.78, overall=55.78 ]	(310.1076, 281.11)(290.0896, 700.38)(313.6255, 235.85999)(292.49548, 56706.504)(293.6312, 4638.435)(293.1048, 263.01)(328.32935, 12277.378)(330.15445, 1290.698)(331.14807, 431.185)(311.13998, 912.86835)(332.26282, 1969.5918)(335.1041, 585.8)(313.88666, 989.514)
Oleuropein	Other polyphenols	2848184	2591918	1922906	2114394	1422216	1252116		533533	532355	4303234	3927513	1528322	1080899		Oleuropein [ C25 H32 O13, tgt=63.85, overall=63.85 ]	(525.1839, 342.105)(545.2099, 1585.7399)(523.17993, 37154.375)(524.1825, 6143.8)(525.1842, 446.84)(541.21643, 38619.56)(542.21936, 6493.0356)(545.2157, 4783.77)(566.0182, 5340.8765)(567.18585, 650.208)(546.8355, 12497.3125)(548.1722, 2572.646)
Acetyl eugenol	Other polyphenols	522623	491773	565542	563019	347993	367246		438230	436433	823546	787780	378051	370910		Acetyl eugenol [ C12 H14 O3, tgt=61.06, overall=61.06 ]	(206.21907, 19707.213)(207.28426, 2661.9941)(189.08723, 200.25667)(214.08264, 78885.0)(215.08575, 2160.8457)(216.0884, 524.19495)
4-Ethylphenol	Other polyphenols	1	1	112636	117273	1	1		1	1	564514	531198	1	1		4-Ethylphenol [ C8 H10 O, tgt= ]	(123.07773, 4056.4167)(126.0889, 2346.7148)(105.06846, 2137011.2)(106.071495, 158006.77)(107.074524, 3336.7173)(122.09468, 485614.38)(123.09755, 31216.473)(124.1099, 1965.2133)(148.07024, 297.51334)
3-Methoxyacetophenone	Other polyphenols	352295	169298	169223	172479	310809	290707		397432	372291	915368	412100	253363	306341		3-Methoxyacetophenone [ C9 H10 O2, tgt=47.35, overall=47.35 ]	(133.05861, 4010.656)(152.36455, 4864.961)(136.14383, 26789.342)(137.07619, 2113.394)(171.10971, 1082.6571)(177.06699, 1687.9231)(158.05489, 711.8351)
Protocatechuic aldehyde	Other polyphenols	5180046	5322186	4224623	4361593	8497433	8755886		8061789	8177397	4489673	2887000	7660762	7334138		Protocatechuic aldehyde [ C7 H6 O3, tgt=83.74, overall=83.74 ]	(139.03598, 1940.9086)(124.037285, 13273.881)(125.04055, 636.91003)(157.06906, 4455.381)(138.05336, 1294052.2)(139.34247, 56505.934)(140.05733, 8592.465)(146.2686, 8798.971)(147.02113, 7262.0103)
2,3-Dihydroxy-1-guaiacylpropanone	Other polyphenols	1128265	1009505	2171680	1872839	1342730	1245600		2088775	1865230	2547921	2360587	1306702	1326730		2,3-Dihydroxy-1-guaiacylpropanone [ C10 H12 O5, tgt=61.64, overall=61.64 ]	(195.0624, 99036.91)(196.0656, 7133.93)(213.40784, 19828.209)(215.0777, 1626.495)(213.07478, 82054.695)(214.0814, 4159.693)(215.0711, 3794.47)(218.0484, 804.77)(217.10117, 7314.3853)
Scopoletin	Other polyphenols	328202	297030	427000	413343	494002	443283		265523	265560	287737	279775	454847	432622		Scopoletin [ C10 H8 O4, tgt=76.60, overall=76.60 ]	(194.04886, 157.765)(175.79117, 4614.144)(180.0522, 164.43)(212.08151, 6084.4414)(214.17467, 1245.1892)(215.08986, 402.11874)(195.07512, 59776.895)(196.07672, 733.23663)(220.04654, 7417.79)(197.0237, 3202.635)
4-Hydroxybenzaldehyde	Other polyphenols	1	1	1	5746085	945671	803919		894708	994618	990473	1	827510	1010396		4-Hydroxybenzaldehyde [ C7 H6 O2, tgt=76.40, overall=76.40 ]	(144.7473, 17998.697)(127.0731, 491.96002)(145.93683, 3697.9968)(129.01973, 141527.97)(130.02258, 9802.093)
4-Methylcatechol	Other polyphenols	1929111	1852901	1591718	1503261	2919664	1775098		3366964	3372995	2430156	2359621	2803577	1780895		4-Methylcatechol [ C7 H8 O2, tgt=86.52, overall=86.52 ]	(125.05697, 3797.1165)(147.0417, 261192.39)(148.04474, 18313.441)(149.05057, 1313.7324)
Catechol	Other polyphenols	99413	1	1	1	1	1		251591	109908	651306	648166	1	1		Catechol [ C6 H6 O2, tgt=46.18, overall=46.18 ]	(115.0483, 4039.5935)(111.98936, 3455.6794)(114.0531, 2101.9973)(119.02614, 3383.6719)
5-Heneicosylresorcinol	Other polyphenols	192730	183522	619586	632047	409524	497098		503660	514205	1017503	1027286	355433	326243		5-Heneicosylresorcinol [ C27 H48 O2, tgt=28.07, overall=28.07 ]	(405.3657, 12970.201)(407.22778, 2483.643)(429.14124, 12043.583)(428.35306, 935.63)
4-Ethylcatechol	Other polyphenols	145243	113432	260677	211484	193430	184467		84545	85850	147958	161348	196222	173428		4-Ethylcatechol [ C8 H10 O2, tgt=43.04, overall=43.04 ]	(142.18854, 1846.62)(141.38214, 3803.3086)(142.08371, 2814.7214)(121.75781, 88097.375)(122.06573, 11918.141)(156.09995, 2047.51)(138.0899, 974.14)(165.44342, 4575.2666)
p-HPEA-EA	Other polyphenols	2424045	2443534	22981264	22481920	4491980	4445001		23577224	23411956	50181396	49057204	4425037	4235649		p-HPEA-EA [ C19 H22 O7, tgt=68.43, overall=68.43 ]	(349.14026, 8314.728)(389.13525, 13704.298)(371.12576, 231010.7)(372.12817, 27283.547)
p-HPEA-AC	Other polyphenols	1244214	1420049	3698432	2844258	863752	3305290		918354	854962	657906	540172	3410459	701598		p-HPEA-AC [ C10 H12 O3, tgt=95.17, overall=95.17 ]	(181.08037, 27947.559)(182.08376, 2660.768)(164.0708, 4624.07)(184.09384, 2650.54)(166.08406, 331713.22)(167.08713, 28004.107)(168.08913, 1704.5155)(180.0992, 14316.773)(181.0945, 1165.92)(187.53912, 7984.5215)(188.40092, 73408.27)(189.82254, 4254.735)(190.073, 629.99)
Tyrosol	Other polyphenols	145243	113432	260677	211484	193430	184467		84545	85850	147958	161348	196222	173428		Tyrosol [ C8 H10 O2, tgt=43.04, overall=43.04 ]	(142.18854, 1846.62)(141.38214, 3803.3086)(142.08371, 2814.7214)(121.75781, 88097.375)(122.06573, 11918.141)(156.09995, 2047.51)(138.0899, 974.14)(165.44342, 4575.2666)
Bergapten	Other polyphenols	1648366	579486	348745	338164	201415	360111		203627	195199	1212068	1213489	213665	239390		Bergapten [ C12 H8 O4, tgt=47.26, overall=47.26 ]	(216.03915, 569.22)(200.8393, 8214.031)(200.16821, 15715.841)(203.0502, 15034.205)(204.0527, 6935.04)(237.08269, 2134.6516)(217.0659, 86688.21)(243.04341, 1819.472)(221.02216, 10352.589)(222.0264, 1223.6029)
Xanthotoxin	Other polyphenols	1648366	579486	348745	338164	201415	360111		203627	195199	1212068	1213489	213665	239390		Xanthotoxin [ C12 H8 O4, tgt=47.26, overall=47.26 ]	(216.03915, 569.22)(200.8393, 8214.031)(200.16821, 15715.841)(203.0502, 15034.205)(204.0527, 6935.04)(237.08269, 2134.6516)(217.0659, 86688.21)(243.04341, 1819.472)(221.02216, 10352.589)(222.0264, 1223.6029)
Demethoxycurcumin	Other polyphenols	1446064	1499473	2123167	1820204	1575896	1531839		2856459	2775615	3210531	3162734	2261945	1540938		Demethoxycurcumin [ C20 H18 O5, tgt=66.60, overall=66.60 ]	(342.12302, 35181.652)(321.60947, 54439.24)(321.1084, 8601.901)(343.1336, 53137.6)(344.13397, 28533.379)(321.1101, 94276.68)(322.11215, 7248.0015)(323.11484, 3828.37)(358.11185, 53256.863)(358.77283, 12911.804)(358.64883, 6975.0684)(360.1632, 1796.97)(340.48148, 16405.068)(342.15347, 2988.1272)(363.3599, 6078.852)(365.5138, 13989.224)(366.11435, 2797.5967)(346.1046, 2199.7869)
Sinapaldehyde	Other polyphenols	1	1	1	1	1	1		1	1	156050	275758	1	1		Sinapaldehyde [ C11 H12 O4, tgt= ]	(209.07573, 30818.049)(210.07909, 1369.84)(195.0747, 5283.925)(191.06764, 169143.5)(192.07063, 12928.566)(213.1084, 4394.544)(234.7412, 249.08667)
Demethyloleuropein	Other polyphenols	392334	108070	318645	1230714	141381	148486		648653	350942	851303	936719	139184	134178		Demethyloleuropein [ C24 H30 O13, tgt=39.62, overall=39.62 ]	(528.5012, 4306.8335)(531.6763, 7072.285)(532.1777, 1925.94)(510.76825, 6343.0923)(511.17004, 1770.51)(532.9056, 28270.66)(510.72427, 15048.502)(511.5734, 4027.532)(511.1751, 2852.43)(547.78674, 2560.217)(527.1979, 1259.655)(549.5632, 1807.1879)(531.1474, 1073.59)
Coumestrol	Other polyphenols	2533087	2211811	2001980	95784	96573	96374		350363	363853	733082	691383	97421	94882		Coumestrol [ C15 H8 O5, tgt=43.15, overall=43.15 ]	(291.02393, 3693.7852)(255.0433, 346.24)(270.47113, 19402.385)(272.49338, 1781.73)(273.0487, 1657.09)(290.26306, 6058.5376)(291.08075, 1043.45)(271.0512, 362.49)(276.52594, 28582.309)(277.5304, 45520.188)
p-HPEA-EDA	Other polyphenols	448995	434627	71225360	604911	684590	680560		420710	427897	2323774	17553156	665741	631896		p-HPEA-EDA [ C17 H20 O5, tgt=53.53, overall=53.53 ]	(304.13425, 22361.594)(305.1459, 4325.72)(287.13126, 2083.644)(307.16333, 3955.3823)(330.08603, 36999.74)(330.73975, 4718.075)(312.61887, 867.73376)
Carnosol	Other polyphenols	413010	408892	495011	529390	471295	468745		335363	346617	421017	412547	402370	391569		Carnosol [ C20 H26 O4, tgt=79.87, overall=79.87 ]	(333.19568, 3957.23)(334.1976, 609.035)(313.1727, 81301.76)(314.17624, 10818.202)(315.17944, 1854.8043)(333.19785, 21452.902)(334.20007, 5727.6924)(340.17926, 409.315)
Esculin	Other polyphenols	1002858	386265	1016134	379935	361228	1561158		492992	660495	674513	639441	1527921	340623		Esculin [ C15 H16 O9, tgt=48.61, overall=48.61 ]	(344.19836, 15768.186)(345.0891, 25364.83)(323.0682, 38841.234)(324.07132, 7333.3633)(325.0742, 838.75)(345.0995, 4114.825)(325.08383, 3899.9016)(326.08682, 337.32)(360.00888, 15225.464)(360.91922, 4815.076)(340.10245, 23682.121)(341.1082, 3768.9795)(365.57745, 3869.5999)(347.06445, 1516.06)
Oleoside 11-methylester	Other polyphenols	1276791	1242769	1273677	1140091	1419383	1412567		1719937	1671186	3613941	3622261	1310828	1		Oleoside 11-methylester [ C17 H24 O11, tgt=62.20, overall=62.20 ]	(406.33612, 9229.686)(406.99698, 6848.971)(407.64096, 1367.5925)(409.13895, 9250.17)(387.12097, 4254.73)(405.13925, 22154.053)(406.1404, 2204.4285)(407.1402, 665.37)(389.3522, 6830.938)(425.21884, 61722.918)(426.17163, 33225.926)(427.1835, 9413.47)(404.1516, 1902.5599)(405.16464, 544.4633)(428.2642, 3330.7688)(410.58105, 39669.66)(411.71783, 7395.9067)(412.7158, 4294.676)(414.11807, 877.57666)
Oleuropein-aglycone	Other polyphenols	747334	565494	1581516	1556994	1360604	2267264		4247583	4253690	1157734	1120911	1345404	1359418		Oleuropein-aglycone [ C19 H21 O8, tgt=55.45, overall=55.45 ]	(378.2556, 8878.476)(380.1329, 7989.14)(360.86646, 7808.1875)(360.1083, 1081.27)(361.1061, 699.42)(381.1445, 475.52)(361.12622, 4846.7236)(395.66275, 4383.775)(396.1631, 329.6)(379.15128, 49918.68)(380.15408, 5538.832)(381.15564, 2560.6174)(403.52545, 2961.91)(385.9144, 3843.403)(383.59644, 1535.08)(387.1198, 1517.16)
4-Vinylguaiacol	Other polyphenols	352295	169298	169223	172479	310809	290707		397432	372291	915368	412100	253363	306341		4-Vinylguaiacol [ C9 H10 O2, tgt=47.35, overall=47.35 ]	(133.05861, 4010.656)(152.36455, 4864.961)(136.14383, 26789.342)(137.07619, 2113.394)(171.10971, 1082.6571)(177.06699, 1687.9231)(158.05489, 711.8351)
Epirosmanol	Other polyphenols	287834	959403	706038	1144574	1092716	1122347		271538	109988	675914	659561	1077062	1072034		Epirosmanol [ C20 H26 O5, tgt=55.41, overall=55.41 ]	(348.27347, 9067.437)(348.18008, 438.91202)(329.16772, 10849.776)(330.1697, 670.44)(349.3031, 4394.8877)(350.19656, 2506.355)(331.1831, 9362.916)(332.1852, 922.8733)(350.2112, 1306.56)(372.31888, 54694.223)(373.84497, 8961.978)(354.41467, 28883.605)(355.91913, 615431.8)(356.1713, 387678.28)
3,4-DHPEA-EA	Other polyphenols	1808174	1874012	994278	976249	4454286	5220844		4605419	1	10576847	10012633	4368564	4221284		3,4-DHPEA-EA [ C19 H22 O8, tgt=47.46, overall=47.46 ]	(379.75864, 123731.79)(380.28775, 20621.041)(361.1229, 11045.12)(362.122, 286.98)(381.1466, 243755.98)(382.14932, 50698.316)(361.1261, 17237.11)(362.1228, 445.18)(363.1184, 146.13)(396.1654, 2377.65)(397.16873, 164.54668)(403.52655, 658.592)(405.132, 75.89)(406.1352, 82.48)(387.24335, 11117.74)(388.1224, 2147.18)
Rosmanol	Other polyphenols	287834	959403	706038	1144574	1092716	1122347		271538	109988	675914	659561	1077062	1072034		Rosmanol [ C20 H26 O5, tgt=55.41, overall=55.41 ]	(348.27347, 9067.437)(348.18008, 438.91202)(329.16772, 10849.776)(330.1697, 670.44)(349.3031, 4394.8877)(350.19656, 2506.355)(331.1831, 9362.916)(332.1852, 922.8733)(350.2112, 1306.56)(372.31888, 54694.223)(373.84497, 8961.978)(354.41467, 28883.605)(355.91913, 615431.8)(356.1713, 387678.28)
Oleoside dimethylester	Other polyphenols	2791946	2870762	2881674	2902672	4059360	1078356		1865141	1778969	1817471	1770614	2609178	2537334		Oleoside dimethylester [ C18 H26 O11, tgt=85.68, overall=85.68 ]	(420.75323, 9621.704)(421.15515, 1664.8601)(401.5644, 33501.598)(402.1379, 7985.0664)(403.1422, 12601.375)(405.1492, 146.1)(403.90137, 15617.332)(404.15247, 915.61664)(439.4744, 22782.596)(440.1896, 2683.1616)(418.9204, 6037.325)(441.9411, 95687.77)(443.21445, 16988.512)(443.14255, 4083.9766)(425.13394, 10935.316)(426.13693, 1319.9015)
4-Hydroxycoumarin	Other polyphenols	1	1068663	1260155	985355	4778381	4673096		7879601	20865798	9749671	2571942	4668180	4530295		4-Hydroxycoumarin [ C9 H6 O3, tgt=45.77, overall=45.77 ]	(164.37206, 97710.375)(164.0387, 1070.12)(146.02745, 3756.605)(163.03676, 346136.12)(164.03972, 23989.178)(165.04266, 2676.88)(145.42975, 2816.8782)(167.06714, 760.3167)(170.02061, 10483.094)
4-Vinylphenol	Other polyphenols	41740356	40805724	1	71192568	75867464	73787856		110045072	110103832	156313536	155445136	73516064	72392016		4-Vinylphenol [ C8 H8 O, tgt=82.61, overall=82.61 ]	(102.79807, 3674.1)(123.14713, 4934.122)(103.05288, 376293.75)(104.05607, 26506.287)(138.0896, 882.74)(120.0793, 3297108.2)(121.08244, 282366.1)
Ligstroside-aglycone	Other polyphenols	774191	765149	2298474	2091827	26712670	28570352		38513552	38184828	3043543	3065859	28246784	28203296		Ligstroside-aglycone [ C19 H21 O7, tgt=50.28, overall=50.28 ]	(361.5298, 8253.482)(346.12445, 57867.125)(347.4008, 6180.8438)(364.57318, 1537.2615)(346.4192, 19917.488)(345.12924, 6464.5312)(346.1328, 1696.07)(379.1654, 2048.3901)(362.98868, 4868.9717)(363.15616, 8779.49)(364.15884, 673.28)(386.98367, 10299.817)(385.12677, 2678.875)(369.36847, 82352.03)(369.37125, 33219.246)(368.1205, 4349.677)
Hydroxytyrosol 4-O-glucoside	Other polyphenols	2065717	2169108	10705298	3216587	2530993	2501461		1863905	7747728	3513587	3448814	2476628	2409231		Hydroxytyrosol 4-O-glucoside [ C14 H20 O9, tgt=61.70, overall=61.70 ]	(333.29166, 14675.862)(334.11234, 1040.5599)(315.09955, 26570.283)(316.10245, 6159.207)(317.1041, 7459.0366)(335.1258, 55532.754)(336.1282, 5263.9834)(337.13025, 921.1484)(317.1153, 109542.88)(318.11777, 10619.905)(350.14252, 370.30002)(332.31445, 45556.598)(333.88098, 2534.6326)(356.93924, 8635.257)(358.7313, 30156.387)(360.10806, 3201.5518)(338.73303, 81284.91)(339.6983, 9239.928)(339.0841, 164…
Estragole	Other polyphenols	2949212	92463	288181	291151	118971	116951		1	294733	506464	507167	102275	95983		Estragole [ C10 H12 O, tgt=47.53, overall=47.53 ]	(149.09355, 12607.629)(150.09637, 698.6075)(169.46387, 600.0233)(176.0906, 2251.47)(157.08057, 10956.337)
3-Methylcatechol	Other polyphenols	1929111	1852901	1591718	1503261	2919664	1775098		3366964	3372995	2430156	2359621	2803577	1780895		3-Methylcatechol [ C7 H8 O2, tgt=86.52, overall=86.52 ]	(125.05697, 3797.1165)(147.0417, 261192.39)(148.04474, 18313.441)(149.05057, 1313.7324)
Pyrogallol	Other polyphenols	3962576	3292305	5470068	4316081	5217633	5564885		5368933	4863097	4838377	4577731	5527728	5366290		Pyrogallol [ C6 H6 O3, tgt=87.10, overall=87.10 ]	(149.02133, 223222.05)(150.024, 12756.466)(151.0264, 500.14)
3,4-DHPEA-EDA	Other polyphenols	6101877	6004349	10270677	41278036	39813112	42299936		11673916	43877712	99728464	98181376	41867916	39379856		3,4-DHPEA-EDA [ C17 H20 O6, tgt=77.33, overall=77.33 ]	(322.13156, 2074.89)(341.8834, 3309.5894)(324.15588, 824.645)(346.791, 48114.703)(347.74683, 5017.1006)(329.11572, 230827.86)(330.11865, 26834.408)
Arbutin	Other polyphenols	2963827	574685	1359394	1373795	2151340	2147250		1376939	1349826	2611108	581183	2221433	2161123		Arbutin [ C12 H16 O7, tgt=47.61, overall=47.61 ]	(273.09036, 29176.201)(274.09317, 2318.331)(257.0833, 2015.09)(275.73843, 36821.95)(276.4836, 5169.329)(277.1092, 2862.32)(257.0945, 1479.27)(290.12448, 24572.846)(291.12598, 3223.4604)(296.91434, 1319.0067)(277.0644, 506.26)
5-Heneicosenylresorcinol	Other polyphenols	233856	231375	158218	182288	136865	136638		169920	181309	179769	164775	135061	124905		5-Heneicosenylresorcinol [ C27 H46 O2, tgt=65.22, overall=65.22 ]	(402.35092, 10863.771)(403.35385, 1388.3716)
Rosmadial	Other polyphenols	208073	208295	859122	859725	272902	254827		890251	886751	970161	946607	331456	244463		Rosmadial [ C20 H24 O5, tgt=74.48, overall=74.48 ]	(347.16977, 23439.428)(345.83218, 5195.5566)(331.16684, 11975.381)(371.22418, 87947.84)(372.16434, 11273.337)(352.53372, 18013.877)(353.35156, 1394.325)
Coumarin	Other polyphenols	1223922	1118140	1	1	2122559	2146871		2747093	2692316	6132710	5849955	1997484	2007957		Coumarin [ C9 H6 O2, tgt=38.39, overall=38.39 ]	(147.0413, 41925.996)(151.04926, 14259.58)(164.07153, 60781.977)(165.07431, 2634.891)(166.06714, 1189.649)(147.06085, 131821.45)(147.06105, 9489.607)(172.03604, 265.81)
Isopimpinellin	Other polyphenols	557383	563165	504431	521299	505509	511731		536803	540122	550195	540843	532820	515149		Isopimpinellin [ C13 H10 O5, tgt=59.71, overall=59.71 ]	(248.39165, 4012.423)(233.05756, 980.05005)(250.0668, 1348.06)(229.05127, 7249.4224)(267.0936, 18267.045)(268.09793, 4177.805)(269.1024, 340.59)(246.0782, 28352.99)(247.08008, 1455.7045)(251.0334, 343.53)
Guaiacol	Other polyphenols	1929111	1852901	1591718	1503261	2919664	1775098		3366964	3372995	2430156	2359621	2803577	1780895		Guaiacol [ C7 H8 O2, tgt=86.52, overall=86.52 ]	(125.05697, 3797.1165)(147.0417, 261192.39)(148.04474, 18313.441)(149.05057, 1313.7324)
1,4-Naphtoquinone	Other polyphenols	322431	305684	349225	331183	397589	394641		1	1	131157	1	390607	382544		1,4-Naphtoquinone [ C10 H6 O2, tgt=40.68, overall=40.68 ]	(164.05647, 1317.784)(146.04637, 610.50745)(179.08054, 325.504)(184.0363, 2371.8098)
Curcumin	Other polyphenols	195509	208604	408420	621929	676488	651275		6716001	6637899	529751	10720804	500579	505440		Curcumin [ C21 H20 O6, tgt=70.85, overall=70.85 ]	(395.12558, 335527.66)(396.12888, 53751.426)(355.13028, 64978.297)(356.13373, 16329.4375)(369.06595, 165159.2)(369.1288, 28115.346)(370.13046, 2366.2466)(389.16968, 45728.086)(390.17288, 4284.146)(371.6414, 111295.39)(372.36588, 14579.5)(373.14078, 6673.3765)(375.1158, 340.5)(371.2223, 105148.45)(372.07227, 76388.984)(372.1656, 85202.95)
Phlorin	Other polyphenols	4216683	4185798	4455374	4355448	3098013	3079316		2381133	2360946	4404847	4317932	3036704	3138100		Phlorin [ C12 H16 O8, tgt=51.77, overall=51.77 ]	(289.21008, 29973.693)(290.0868, 3911.108)(271.0763, 350.15)(291.09964, 14759.783)(292.10275, 1731.1876)(294.1009, 707.18)(273.09024, 12465.835)(274.09286, 1689.0975)(306.7631, 8031.0986)(308.12076, 1048.1616)(288.18008, 23220.291)(315.68915, 1342.778)(293.05933, 106354.3)(294.06195, 14710.445)(295.05853, 11841.118)
Hydroxytyrosol	Other polyphenols	679725	675319	1008142	1020967	976989	947940		1616925	1610119	1037626	994042	935554	890231		Hydroxytyrosol [ C8 H10 O3, tgt=72.93, overall=72.93 ]	(137.05716, 852.4025)(159.08095, 1537.1799)(172.09523, 1036.6787)(177.05223, 142520.11)(178.05531, 10619.355)(162.05182, 3208.0984)
Carnosic acid	Other polyphenols	9096797	1	8891326	9160059	8726037	8769799		624944	1065248	1	1	8451736	8478399		Carnosic acid [ C20 H28 O4, tgt=68.85, overall=68.85 ]	(333.19885, 353136.5)(334.201, 71708.29)(335.211, 19967.635)(336.2145, 958.52)(315.19028, 19030.924)(316.19342, 2745.8787)(335.21332, 3718.9248)(317.20554, 6718.599)(318.2077, 569.5467)(350.235, 697.682)(339.186, 2081.095)
Mellein	Other polyphenols	92928	1	172455	1	227591	191325		129845	131329	1	1	210648	188166		Mellein [ C10 H10 O3, tgt=38.68, overall=38.68 ]	(179.06512, 17400.531)(160.05376, 4174.241)(180.07346, 2053.062)(164.0676, 753.165)(183.09785, 1296.885)(204.06113, 414.2575)
Ferulaldehyde	Other polyphenols	92928	1	172455	1	227591	191325		129845	131329	1	1	210648	188166		Ferulaldehyde [ C10 H10 O3, tgt=38.68, overall=38.68 ]	(179.06512, 17400.531)(160.05376, 4174.241)(180.07346, 2053.062)(164.0676, 753.165)(183.09785, 1296.885)(204.06113, 414.2575)
Vanillin	Other polyphenols	1487620	564068	432449	418540	447772	475954		1844118	1289836	1	440988	496148	414111		Vanillin [ C8 H8 O3, tgt=65.47, overall=65.47 ]	(153.0495, 4296.455)(137.226, 4570.0864)(139.0499, 676.09)(155.0613, 2856.4534)(138.05304, 931225.25)(139.05563, 109683.234)(140.05763, 8836.747)(171.1737, 4885.581)(171.0774, 490.675)(154.5748, 4334.335)(160.03458, 1494.322)
5-Heptadecylresorcinol	Other polyphenols	1	1	1	1	1	1		1	1	1	1	1	1		5-Heptadecylresorcinol [ C23 H40 O2, tgt= ]
3,4-DHPEA-AC	Other polyphenols	1	1	1	1	1	1		1	1	1	1	1	1		3,4-DHPEA-AC [ C10 H12 O4, tgt= ]	(197.07759, 4622.671)(179.06572, 23317.607)(180.07346, 2026.0901)(216.1136, 495.535)
Anethole	Other polyphenols	1	1	1	1	1	1		1	1	1	1	1	1		Anethole [ C10H12O, tgt= ]
Syringaldehyde	Other polyphenols	1035752	999340	2151338	2223895	2010096	1917067		5387647	5531716	1	6484705	1812823	1869081		Syringaldehyde [ C9 H10 O4, tgt=76.17, overall=76.17 ]	(185.46387, 20497.844)(186.3521, 2451.6973)(187.068, 5119.8)(165.05202, 38594.316)(166.05267, 1425.02)(184.85422, 9744.063)(185.5727, 7174.195)(186.073, 11674.45)(165.83755, 33937.816)(166.05128, 2707.2576)(182.12892, 151993.36)(183.08185, 11920.774)(184.08421, 1338.4166)(209.44872, 10298.289)(210.05737, 24349.158)(190.04677, 817.02496)
5-Pentacosenylresorcinol	Other polyphenols	401606	409800	136569	142721	169042	163697		230598	236555	1	1	1	1		5-Pentacosenylresorcinol [ C31 H54 O2, tgt=65.64, overall=65.64 ]	(440.4025, 14844.7)(441.40536, 2696.7812)
5-Tricosenylresorcinol	Other polyphenols	127356	121297	1	239827	515332	483014		147505	94027	1	1	337880	338511		5-Tricosenylresorcinol [ C29 H50 O2, tgt=59.47, overall=59.47 ]	(430.66644, 10594.869)(431.6697, 931.21716)(413.37103, 15755.707)(414.37408, 2767.1611)
[6]-Gingerol	Other polyphenols	586289	541782	549129	553791	886366	938704		419003	436634	1	1	453983	471109		[6]-Gingerol [ C17 H26 O4, tgt=74.17, overall=74.17 ]	(295.1892, 1445.005)(317.17386, 38810.99)(318.17682, 4581.2534)
Gallic aldehyde	Other polyphenols	355028	369253	355549	387511	496629	482117		1	1	1	1	93435	458296		Gallic aldehyde [ C7 H6 O4, tgt=47.54, overall=47.54 ]	(155.02945, 2055.7886)(137.02069, 12874.634)(173.06242, 1058.6487)(178.81972, 11104.717)
2-Methoxy-5-prop-1-enylphenol	Other polyphenols	456334	462844	364400	355297	1059044	1001494		1	1	1	1	1003044	1011595		2-Methoxy-5-prop-1-enylphenol [ C10 H12 O2, tgt=71.30, overall=71.30 ]	(165.08667, 24984.42)(166.08919, 1631.4901)(147.07407, 14160.16)(151.0934, 609.89)(165.11086, 9413.016)(188.0783, 932.93)(173.07549, 6479.568)(174.0747, 1060.39)
Eugenol	Other polyphenols	456334	462844	364400	355297	1059044	1001494		1	1	1	1	1003044	1011595		Eugenol [ C10 H12 O2, tgt=71.30, overall=71.30 ]	(165.08667, 24984.42)(166.08919, 1631.4901)(147.07407, 14160.16)(151.0934, 609.89)(165.11086, 9413.016)(188.0783, 932.93)(173.07549, 6479.568)(174.0747, 1060.39)
4-Ethylguaiacol	Other polyphenols	1	1	1	1	1	1		1	1	1	1	1	1		4-Ethylguaiacol [ C9 H12 O2, tgt= ]	(138.08893, 7921.978)(139.0921, 71.5)(173.12564, 2009.3566)(160.34648, 3780.6326)(161.0752, 1157.975)
Avenanthramide 2c	Phenolic acids	1496914	1399413	1755002	1734095	1788934	1731678		1441160	1459294	4277036	1	1333313	1657394		Avenanthramide 2c [ C16 H13 N O5, tgt=51.83, overall=51.83 ]	(300.57965, 630.5312)(281.06485, 3148.8052)(303.0989, 2630.89)(317.11246, 51238.836)(318.11554, 4564.1367)(319.10968, 3097.638)(299.10492, 9666.995)(300.10815, 1559.99)(301.1065, 263.7)(323.0687, 34176.18)(324.0718, 4860.3936)(325.07758, 1503.755)(305.062, 1354.02)
Avenanthramide 2f	Phenolic acids	9501799	9798765	853279	775953	17750044	318216		9759590	15949982	31466460	31482088	15287937	15228489		Avenanthramide 2f [ C17 H15 N O6, tgt=62.56, overall=62.56 ]	(331.59695, 1446.9701)(313.0833, 2474.526)(314.08615, 654.78)(334.4823, 973.9675)(335.10773, 1378.3899)(316.59668, 13164.692)(347.12512, 47173.055)(348.12854, 3956.96)(349.1202, 957.2414)(329.11566, 244716.73)(330.11835, 26233.244)(331.11777, 13195.458)(332.12784, 2708.425)(353.81052, 16539.625)(354.08066, 1159.2633)(338.50626, 12723.054)
8-O-4'-Dehydrodiferulic acid	Phenolic acids	1	1	2301906	2352779	3492537	3280123		4261518	4257040	3212945	1971531	3353457	3289781		8-O-4'-Dehydrodiferulic acid [ C20 H18 O8, tgt=43.22, overall=43.22 ]	(388.3039, 14559.234)(388.10193, 1200.5966)(368.58826, 1532.4349)(389.1159, 7736.7646)(372.27432, 1037.8016)(405.2297, 20400.592)(406.44025, 17904.992)(407.28348, 3239.7957)(389.1306, 7981.6587)(390.1358, 171.5175)(409.09476, 5733.0586)(392.7102, 14230.927)(395.75772, 31417.43)(396.0918, 11047.23)
p-Coumaroyl glycolic acid	Phenolic acids	2200651	1857125	1781844	1916405	1776993	1915001		1992873	1835362	2071431	2086745	1893467	1696560		p-Coumaroyl glycolic acid [ C8 H8 O4, tgt=69.26, overall=69.26 ]	(169.04443, 8964.063)(151.03246, 2230.444)(169.04933, 10281.756)(170.04553, 8045.866)(153.37944, 15731.198)(154.0469, 14303.4)(155.04895, 675.89)(187.07693, 86848.38)(188.07959, 11235.076)(173.0755, 8377.816)(196.0453, 1181.64)(177.0309, 374.23)
2-S-Glutathionyl caftaric acid	Phenolic acids	1	1	1	1	1	1		227544	214362	218346	209317	1	1		2-S-Glutathionyl caftaric acid [ C23H27N3O15S, tgt= ]	(619.10986, 11194.045)(620.1107, 1908.335)(601.1081, 2827.1099)(617.13837, 51721.844)(618.141, 10837.555)(619.1453, 1391.5084)(623.09015, 13393.016)(624.0929, 2673.09)
Gallic acid 3-O-gallate	Phenolic acids	1	1	607453	574886	697048	659201		1256175	1227955	1698460	1729460	680356	617337		Gallic acid 3-O-gallate [ C14 H10 O9, tgt=74.45, overall=74.45 ]	(323.03223, 907.44794)(304.0215, 1574.3601)(323.0424, 21888.73)(324.0457, 710.97)(307.03748, 6160.205)(340.0713, 554.4)(322.05588, 28422.152)
4-Caffeoylquinic acid	Phenolic acids	2603289	2720658	4339491	4278005	3466208	3413051		7039600	7045256	10541620	10252430	3369569	3318526		4-Caffeoylquinic acid [ C16 H18 O9, tgt=71.30, overall=71.30 ]	(355.49554, 71693.13)(356.4513, 10183.9375)(357.39194, 6604.039)(359.1084, 47705.266)(337.08405, 42246.82)(338.08746, 3946.986)(339.7606, 1498.14)(357.10922, 8975.89)(338.87628, 23362.553)(339.8125, 4081.9612)(372.12836, 29631.25)(354.1176, 922.17596)(380.09067, 754.4634)(361.4131, 4945.323)(361.083, 5009.95)(362.082, 6567.68)(363.0867, 339.92)
p-Coumaric acid ethyl ester	Phenolic acids	375149	149401	338109	206745	170242	163063		133225	132381	305642	329326	374846	354157		p-Coumaric acid ethyl ester [ C11 H12 O3, tgt=44.18, overall=44.18 ]	(193.08093, 14054.763)(194.30717, 809.24664)(194.84004, 2586.04)(176.08005, 2055.7002)(211.03882, 1049.15)(213.12, 2040.06)(197.1136, 1115.642)(218.0772, 8953.741)(219.0788, 210.46)(201.06963, 2148.72)
Ferulic acid 4-O-glucoside	Phenolic acids	1	1	1	1	1	1		1	5104975	1099360	1	1	1		Ferulic acid 4-O-glucoside [ C16H20O9, tgt= ]	(358.44934, 17382.14)(360.1169, 4766.79)(338.60205, 38619.09)(340.1019, 8563.21)(341.1121, 4954.24)(342.1101, 1668.35)(359.124, 9613.32)(360.1285, 313.76)(361.1284, 5491.81)(341.1154, 60435.492)(342.11566, 8396.955)(374.14355, 17542.84)(356.1334, 2210.79)(381.44064, 1276.7367)(384.1088, 2261.26)(362.08893, 1202.925)(365.1001, 5739.96)
1,2'-Disinapoyl-2-feruloylgentiobiose	Phenolic acids	1	1	127564	151685	1	1		1	1	181925	172134	1	1		1,2'-Disinapoyl-2-feruloylgentiobiose [ C44 H50 O22, tgt= ]	(931.30505, 6965.6377)(932.30774, 1726.542)(933.3167, 858.83)
p-Coumaroyl tartaric acid	Phenolic acids	1	3690065	2492551	1246454	2093195	1996745		1636937	1778584	711073	701216	2084435	2069267		p-Coumaroyl tartaric acid [ C13 H12 O8, tgt=49.58, overall=49.58 ]	(297.05322, 1021.17505)(279.04282, 8455.802)(297.8155, 3532.168)(298.06012, 3251.8022)(314.4885, 77256.36)(299.8844, 5916.2583)(321.44672, 21407.154)(322.0496, 5769.967)(321.0415, 299.81)
Dihydro-p-coumaric acid	Phenolic acids	28113954	26863450	46743920	47278640	50577544	48246220		74649872	75434880	106331272	106957672	48039664	46714896		Dihydro-p-coumaric acid [ C9 H10 O3, tgt=91.26, overall=91.26 ]	(149.05708, 24520.758)(150.05576, 10274.415)(170.07843, 2181.6428)(151.81606, 2535.1082)(187.1049, 301.7)(166.08424, 2461384.2)(167.08734, 217853.89)(168.08916, 13020.004)(194.06465, 8337.332)(173.04523, 4625.443)(174.05095, 889.9)
p-Coumaric acid 4-O-glucoside	Phenolic acids	5523031	5737842	1821710	1798991	8838076	8109187		7558608	7622926	3517732	13174739	1322340	8601179		p-Coumaric acid 4-O-glucoside [ C15 H18 O8, tgt=68.54, overall=68.54 ]	(327.1, 59321.367)(328.10287, 6793.8516)(308.88898, 89405.15)(309.86066, 9341.09)(310.08463, 10344.434)(329.1159, 271013.38)(330.11868, 28354.146)(331.11572, 6684.85)(311.1046, 2383.676)(344.13394, 50487.863)(326.52237, 5052.896)(349.0871, 1777.8961)(333.45187, 3416.795)(334.0838, 5666.7183)
Vanillic acid	Phenolic acids	2200651	1857125	1781844	1916405	1776993	1915001		1992873	1835362	2071431	2086745	1893467	1696560		Vanillic acid [ C8 H8 O4, tgt=69.26, overall=69.26 ]	(169.04443, 8964.063)(151.03246, 2230.444)(169.04933, 10281.756)(170.04553, 8045.866)(153.37944, 15731.198)(154.0469, 14303.4)(155.04895, 675.89)(187.07693, 86848.38)(188.07959, 11235.076)(173.0755, 8377.816)(196.0453, 1181.64)(177.0309, 374.23)
24-Methylcholesterol ferulate	Phenolic acids	4727891	4439689	4777834	34163148	30736584	32794300		687596	730040	49779352	48997440	5727715	4762779		24-Methylcholesterol ferulate [ C38 H56 O4, tgt=88.77, overall=88.77 ]	(582.4272, 4445.755)(595.4623, 1636.0)(596.4646, 238.85)(599.4423, 330391.4)(600.54865, 461615.06)(601.55145, 91199.195)(602.5535, 8507.495)(583.4057, 62325.49)(584.4089, 26708.922)(585.412, 3648.5476)
3,4-Dihydroxyphenylacetic acid	Phenolic acids	2200651	1857125	1781844	1916405	1776993	1915001		1992873	1835362	2071431	2086745	1893467	1696560		3,4-Dihydroxyphenylacetic acid [ C8 H8 O4, tgt=69.26, overall=69.26 ]	(169.04443, 8964.063)(151.03246, 2230.444)(169.04933, 10281.756)(170.04553, 8045.866)(153.37944, 15731.198)(154.0469, 14303.4)(155.04895, 675.89)(187.07693, 86848.38)(188.07959, 11235.076)(173.0755, 8377.816)(196.0453, 1181.64)(177.0309, 374.23)
p-Coumaroyl malic acid	Phenolic acids	2968600	2955171	3421834	3266858	3441792	3415746		1999562	2043898	857922	778559	3406057	3316134		p-Coumaroyl malic acid [ C13 H12 O7, tgt=90.27, overall=90.27 ]	(298.09235, 120484.68)(299.09485, 12005.09)(300.08942, 4032.892)(287.03918, 505.6825)
Schottenol ferulate	Phenolic acids	1184020	414708	1796540	1814030	1779410	1845493		271769	3070175	4830479	4654827	1	1417216		Schottenol ferulate [ C39 H58 O4, tgt=47.48, overall=47.48 ]	(572.4228, 2172.6978)(595.4619, 1370.08)(573.4241, 2638.36)(611.9739, 38758.35)(614.4765, 15801.54)(590.4546, 6413.305)(591.461, 1097.675)(615.27704, 7911.037)(616.14813, 2057.8357)(596.3283, 8832.577)(597.41504, 881.412)
m-Coumaric acid	Phenolic acids	1278690	1365628	2850095	2924206	2642012	2521003		6243560	6403915	7755645	7550842	2559588	2416222		m-Coumaric acid [ C9 H8 O3, tgt=69.59, overall=69.59 ]	(165.05214, 54462.273)(166.72246, 1126.2067)(147.0414, 14319.253)(165.80482, 25023.94)(166.04779, 1873.6887)(150.05293, 40498.82)(151.0558, 1575.2482)(152.0552, 89791.06)(182.21254, 131974.55)(183.0819, 11747.3955)(184.08374, 1184.154)(164.07114, 22950.66)(165.07446, 3103.515)(166.0673, 1422.3125)(190.04677, 574.22003)(173.03908, 3522.9028)
5-5'-Dehydrodiferulic acid	Phenolic acids	1	1	1	1	1	1		1	1	3212945	1971531	1	1		5-5'-Dehydrodiferulic acid [ C20H18O8, tgt= ]	(390.10886, 1482.615)(373.35974, 1118.91)(405.3389, 22341.05)(406.44025, 17904.992)(407.28348, 3239.7957)(389.1302, 1923.8359)(394.3361, 27813.717)(395.75772, 31417.43)(396.0918, 11047.23)
p-Coumaric acid	Phenolic acids	1278690	1365628	2850095	2924206	2642012	2521003		6243560	6403915	7755645	7550842	2559588	2416222		p-Coumaric acid [ C9 H8 O3, tgt=69.59, overall=69.59 ]	(165.05193, 42358.055)(166.72246, 1126.2067)(147.04135, 45543.523)(148.0437, 41119.43)(149.046, 1615.44)(165.80482, 25023.94)(166.04779, 1873.6887)(149.57755, 153291.06)(150.41061, 13381.764)(150.25034, 37351.29)(182.21254, 131974.55)(183.0819, 11747.3955)(184.08374, 1184.154)(164.78711, 19843.035)(165.07446, 3103.515)(166.0673, 1422.3125)(190.04596, 516.202)(173.03908, 3522.9028)
Verbascoside	Phenolic acids	22680244	24017652	18947168	22288638	23145552	17565572		22821818	23741922	23318396	22032022	18979788	21478488		Verbascoside [ C29 H36 O15, tgt=93.92, overall=93.92 ]	(625.19965, 5897.24)(626.2026, 222.65666)(607.18945, 3006.026)(609.2049, 3210.53)(625.2096, 1523.935)(643.244, 1032725.2)(644.2474, 396576.66)(645.2481, 78604.766)(646.24774, 10018.115)(624.22485, 14685.16)(625.2269, 1849.02)
Benzoic acid	Phenolic acids	1	1	1	5746085	945671	803919		894708	994618	990473	1	827510	1010396		Benzoic acid [ C7 H6 O2, tgt=76.40, overall=76.40 ]	(144.7473, 17998.697)(127.0731, 491.96002)(145.93683, 3697.9968)(129.01973, 141527.97)(130.02258, 9802.093)
Syringic acid	Phenolic acids	771756	747181	1520908	1515670	854766	824556		1	1	78793	1	820026	838712		Syringic acid [ C9 H10 O5, tgt=47.59, overall=47.59 ]	(199.19974, 1199.2471)(200.05759, 850.005)(202.0643, 1262.16)(181.38011, 34045.195)(182.0495, 5118.24)(184.3907, 15448.016)(184.20119, 23251.229)(219.0943, 467.21)(200.58215, 2592.465)(224.0494, 762.94)(206.04146, 5318.0986)
Caffeoyl tartaric acid	Phenolic acids	1586743	1	78469	85892	1938767	1964015		137640	206624	1561975	1610489	122206	1483745		Caffeoyl tartaric acid [ C13 H12 O9, tgt=76.99, overall=76.99 ]	(314.5986, 792.85724)(297.04175, 161.95)(314.894, 1832.685)(314.05762, 281.38333)(297.0528, 1378.754)(333.09113, 69695.85)(334.427, 6990.099)(335.09033, 8927.52)(312.07187, 1660.42)(335.53665, 25919.27)(336.03528, 15544.244)(317.35867, 7626.01)
o-Coumaric acid	Phenolic acids	1278690	1365628	2850095	2924206	2642012	2521003		6243560	6403915	7755645	7550842	2559588	2416222		o-Coumaric acid [ C9 H8 O3, tgt=69.59, overall=69.59 ]	(165.05214, 54462.273)(166.72246, 1126.2067)(147.0414, 14319.253)(165.80482, 25023.94)(166.04779, 1873.6887)(150.05293, 40498.82)(151.0558, 1575.2482)(152.0552, 89791.06)(182.21254, 131974.55)(183.0819, 11747.3955)(184.08374, 1184.154)(164.07114, 22950.66)(165.07446, 3103.515)(166.0673, 1422.3125)(190.04677, 574.22003)(173.03908, 3522.9028)
Gallic acid ethyl ester	Phenolic acids	771756	747181	1520908	1515670	854766	824556		1	1	78793	1	820026	838712		Gallic acid ethyl ester [ C9 H10 O5, tgt=47.59, overall=47.59 ]	(199.19974, 1199.2471)(200.05759, 850.005)(202.0643, 1262.16)(181.38011, 34045.195)(182.0495, 5118.24)(184.3907, 15448.016)(184.20119, 23251.229)(219.0943, 467.21)(200.58215, 2592.465)(224.0494, 762.94)(206.04146, 5318.0986)
Cinnamoyl glucose	Phenolic acids	6542977	6512208	207771	11479547	6232032	6178530		2816964	2802062	4435654	5034992	6144679	6395923		Cinnamoyl glucose [ C15 H18 O7, tgt=56.02, overall=56.02 ]	(312.9454, 8568.769)(293.4128, 93466.99)(294.09805, 13529.845)(295.1018, 3827.2625)(313.11963, 396.54166)(295.11005, 1084.75)(328.13818, 48197.977)(329.1345, 790.5)(334.38168, 16077.56)(334.09744, 1565.3301)(319.00333, 54836.297)(320.00644, 6215.5996)(320.0972, 2056.0)
p-Coumaroyl tyrosine	Phenolic acids	13594733	13955692	24658578	24219308	22288566	22450976		20639466	19650736	6304792	6136383	2988826	22193452		p-Coumaroyl tyrosine [ C18 H17 N O5, tgt=79.99, overall=79.99 ]	(329.11594, 279661.6)(330.11874, 29633.082)(331.1233, 11432.7705)(332.12762, 1226.67)(311.10458, 2568.4255)(330.1252, 55096.008)(332.41562, 12570.143)(331.1238, 10906.46)(332.1283, 3421.69)(313.11993, 3115.3887)(345.14627, 276924.3)(346.14948, 44091.848)(347.1525, 7266.9688)(327.13586, 32811.715)(328.13867, 3167.55)(351.52838, 4161.2783)(352.1014, 1126.505)
5-Sinapoylquinic acid	Phenolic acids	669868	697474	884052	877642	686142	686417		385525	377923	209967	750554	664863	653303		5-Sinapoylquinic acid [ C18 H22 O10, tgt=93.94, overall=93.94 ]	(399.11978, 2589.36)(401.134, 11246.48)(381.10904, 8776.714)(382.11206, 1378.0725)(383.124, 16422.57)(400.58606, 59026.47)(401.80453, 11256.551)(403.13876, 18733.852)(404.13763, 1048.8201)(383.12473, 108916.41)(384.12732, 13371.747)(417.32913, 6843.603)(400.65134, 503196.75)(401.8469, 98308.7)(403.15588, 12900.335)(423.1186, 1088.5443)
2-Hydroxybenzoic acid	Phenolic acids	5180046	5322186	4224623	4361593	8497433	8755886		8061789	8177397	4489673	2887000	7660762	7334138		2-Hydroxybenzoic acid [ C7 H6 O3, tgt=83.74, overall=83.74 ]	(139.03598, 1940.9086)(124.037285, 13273.881)(125.04055, 636.91003)(157.06906, 4455.381)(138.05336, 1294052.2)(139.34247, 56505.934)(140.05733, 8592.465)(146.2686, 8798.971)(147.02113, 7262.0103)
3-Sinapoylquinic acid	Phenolic acids	669868	697474	884052	877642	686142	686417		385525	377923	209967	750554	664863	653303		3-Sinapoylquinic acid [ C18 H22 O10, tgt=93.94, overall=93.94 ]	(399.11978, 2589.36)(401.134, 11246.48)(381.10904, 8776.714)(382.11206, 1378.0725)(383.124, 16422.57)(400.58606, 59026.47)(401.80453, 11256.551)(403.13876, 18733.852)(404.13763, 1048.8201)(383.12473, 108916.41)(384.12732, 13371.747)(417.32913, 6843.603)(400.65134, 503196.75)(401.8469, 98308.7)(403.15588, 12900.335)(423.1186, 1088.5443)
Sitosterol ferulate	Phenolic acids	1184020	414708	1796540	1814030	1779410	1845493		271769	3070175	4830479	4654827	1	1417216		Sitosterol ferulate [ C39 H58 O4, tgt=47.48, overall=47.48 ]	(572.4228, 2172.6978)(595.4619, 1370.08)(573.4241, 2638.36)(611.9739, 38758.35)(614.4765, 15801.54)(590.4546, 6413.305)(591.461, 1097.675)(615.27704, 7911.037)(616.14813, 2057.8357)(596.3283, 8832.577)(597.41504, 881.412)
4-Feruloylquinic acid	Phenolic acids	483072	479973	1271062	918214	732524	733388		1321606	1271910	4048660	859339	763825	719169		4-Feruloylquinic acid [ C17 H20 O9, tgt=72.28, overall=72.28 ]	(369.1087, 17589.18)(370.86536, 57113.098)(372.1193, 9010.54)(351.90167, 10157.131)(352.10168, 909.94403)(371.4176, 127572.12)(372.4198, 19395.604)(373.6277, 5857.215)(353.2264, 7651.3716)(354.117, 1265.6575)(386.19885, 8338.034)(370.0097, 79678.11)(376.09457, 4332.62)(377.09616, 870.305)
Ellagic acid glucoside	Phenolic acids	1	1	1	1	166574	165446		1	1	106606	103666	139628	128689		Ellagic acid glucoside [ C20 H16 O13, tgt= ]	(471.08206, 24825.594)(482.0997, 9557.13)(483.1028, 468.73)(464.08252, 9581.491)(465.08475, 832.8325)
5-O-Galloylquinic acid	Phenolic acids	226649	828534	312216	285549	136067	296423		183403	181033	232922	302188	303469	1193408		5-O-Galloylquinic acid [ C14 H16 O10, tgt=47.53, overall=47.53 ]	(347.36655, 2560.467)(349.0859, 1911.69)(329.35516, 1349.2357)(347.08694, 6685.1143)(346.08276, 633.71497)(327.07257, 981.295)(362.10608, 22578.72)(363.1085, 2208.96)(347.60464, 1989.905)(368.06775, 14628.207)(370.0766, 2479.6602)(349.05457, 8796.052)(350.05722, 868.388)
Cinnamic acid	Phenolic acids	28581498	27335648	47530932	48006392	51075368	49364448		75719472	76490056	108071400	108708512	49070576	47751740		Cinnamic acid [ C9 H8 O2, tgt=91.26, overall=91.26 ]	(149.05708, 24421.207)(150.05576, 10274.415)(131.04654, 28835.008)(151.81606, 2514.5452)(131.0474, 19384.75)(166.08424, 2451333.0)(167.08733, 216984.48)(168.08916, 12973.579)(173.04523, 4619.769)(174.05095, 840.46)
Caffeic acid 4-O-glucoside	Phenolic acids	233157	225452	1700591	1529348	1279383	284113		2856899	2957881	3281696	4320392	278726	271931		Caffeic acid 4-O-glucoside [ C15 H18 O9, tgt=84.83, overall=84.83 ]	(344.0989, 4921.1333)(325.08405, 66173.15)(326.08688, 5206.236)(327.09674, 3232.5)(345.24362, 40045.69)(346.11212, 3856.044)(347.11218, 10807.714)(327.0989, 5250.7324)(328.1019, 412.73)(360.6649, 3815.89)(362.13702, 992.99255)(343.624, 13223.835)(344.125, 3063.15)(366.42224, 235530.31)(366.0823, 92984.09)(367.08417, 12219.135)(348.078, 8381.612)(348.07782, 2465.79)(349.0764, 336.36)
5-8'-Dehydrodiferulic acid	Phenolic acids	1	1	2301906	2352779	3492537	3280123		4261518	4257040	3212945	1971531	3353457	3289781		5-8'-Dehydrodiferulic acid [ C20 H18 O8, tgt=43.22, overall=43.22 ]	(388.3039, 14559.234)(388.10193, 1200.5966)(368.58826, 1532.4349)(389.1159, 7736.7646)(372.27432, 1037.8016)(405.2297, 20400.592)(406.44025, 17904.992)(407.28348, 3239.7957)(389.1306, 7981.6587)(390.1358, 171.5175)(409.09476, 5733.0586)(392.7102, 14230.927)(395.75772, 31417.43)(396.0918, 11047.23)
24-Methyllathosterol ferulate	Phenolic acids	4727891	4439689	1	1	30736584	32794300		687596	730040	49779352	48997440	5727715	4762779		24-Methyllathosterol ferulate [ C38 H56 O4, tgt=88.77, overall=88.77 ]	(582.4272, 4445.755)(595.4623, 1636.0)(596.4646, 238.85)(599.4004, 326982.75)(600.4047, 554180.6)(601.40753, 109831.36)(602.4094, 10405.402)(583.40576, 60489.242)(584.40894, 25363.207)(585.41223, 3401.8574)
3,5-Diferuloylquinic acid	Phenolic acids	2689287	2761817	309708	1830088	1733075	1689252		2924748	2875155	2196735	2031820	1793478	1761761		3,5-Diferuloylquinic acid [ C27 H28 O12, tgt=48.45, overall=48.45 ]	(546.4138, 9989.268)(548.1724, 2452.518)(529.0343, 698.6175)(547.1701, 17544.732)(548.1726, 2887.725)(531.1665, 611.24)(562.34375, 15553.65)(565.1963, 1806.625)(566.19946, 227.82)(545.0577, 33390.867)(545.7987, 8896.074)(546.6921, 1018.72)(554.15405, 128663.29)
Gallic acid	Phenolic acids	964789	814240	739393	753483	1	1		1	1	389810	398932	1	509369		Gallic acid [ C7 H6 O5, tgt=46.63, overall=46.63 ]	(171.024, 59779.066)(172.02542, 3439.0803)(152.01245, 2356.585)(174.16263, 2207.8162)(174.37062, 3921.077)(188.0532, 4452.21)(170.79572, 2333.7827)
Stigmastanol ferulate	Phenolic acids	1574216	1591868	691555	4227654	3700780	3703524		6380996	6587817	13692995	13414610	332470	1		Stigmastanol ferulate [ C39 H60 O4, tgt=53.37, overall=53.37 ]	(594.11774, 6170.8735)(595.1208, 1147.8567)(595.46124, 9594.18)(596.46423, 2589.7998)(595.6634, 6186.6357)(596.4651, 1399.768)(616.87335, 2879.3298)(617.5924, 624.1457)(617.4472, 152.31)(597.4193, 1965.1799)
p-Coumaroyl glucose	Phenolic acids	5523031	5737842	1821710	1798991	8838076	8109187		7558608	7622926	3517732	13174739	1322340	8601179		p-Coumaroyl glucose [ C15 H18 O8, tgt=68.54, overall=68.54 ]	(327.1, 59321.367)(328.10287, 6793.8516)(308.94623, 69345.29)(309.92493, 7118.844)(310.0848, 9879.436)(329.1159, 271013.38)(330.11868, 28354.146)(331.11572, 6684.85)(311.1046, 2383.676)(344.13394, 50487.863)(326.52237, 5052.896)(349.0871, 1777.8961)(333.45187, 3416.795)(334.0838, 5666.7183)
Caffeoyl glucose	Phenolic acids	233157	225452	1700591	1529348	1279383	284113		2856899	2957881	3281696	4320392	278726	271931		Caffeoyl glucose [ C15 H18 O9, tgt=84.83, overall=84.83 ]	(344.0989, 4921.1333)(325.08405, 66173.15)(326.08688, 5206.236)(327.09674, 3232.5)(345.24362, 40045.69)(346.11212, 3856.044)(347.11218, 10807.714)(327.0989, 5250.7324)(328.1019, 412.73)(360.6649, 3815.89)(362.13702, 992.99255)(343.624, 13223.835)(344.125, 3063.15)(366.42224, 235530.31)(366.0823, 92984.09)(367.08417, 12219.135)(348.078, 8381.612)(348.07782, 2465.79)(349.0764, 336.36)
Sinapic acid	Phenolic acids	1679836	183823	186146	194400	1796626	1753973		1	1	121502	659778	1759648	1708208		Sinapic acid [ C11 H12 O5, tgt=47.49, overall=47.49 ]	(225.6549, 3311.7893)(227.0758, 4405.775)(228.0786, 451.14)(208.88457, 1579.63)(211.06879, 581.9075)(227.67055, 2769.4587)(229.08636, 134.45667)(210.071, 1313.0575)(244.1064, 293.8425)(225.38167, 1472.4885)(248.56102, 1354.1)(251.06573, 15442.997)(252.06844, 433.24)(233.05862, 2770.7466)(234.0572, 283.4414)
Methoxyphenylacetic acid	Phenolic acids	28113954	26863450	46743920	47278640	50577544	48246220		74649872	75434880	106331272	106957672	48039664	46714896		Methoxyphenylacetic acid [ C9 H10 O3, tgt=91.26, overall=91.26 ]	(149.05708, 24520.758)(150.05576, 10274.415)(170.07843, 2181.6428)(151.81606, 2535.1082)(187.1049, 301.7)(166.08424, 2461384.2)(167.08734, 217853.89)(168.08916, 13020.004)(194.06465, 8337.332)(173.04523, 4625.443)(174.05095, 889.9)
1,2-Disinapoylgentiobiose	Phenolic acids	1	1	1	1	249138	1		141545	155707	880875	959395	1	1		1,2-Disinapoylgentiobiose [ C34 H42 O19, tgt= ]	(755.2363, 5384.94)(756.2414, 959.435)(737.2296, 15403.305)(738.2324, 3610.525)(774.274, 1918.4324)(775.28064, 5301.59)(776.2833, 1469.845)(755.25934, 5037.507)(756.2625, 799.0)(781.2342, 1539.31)(761.88135, 2989.3967)(760.20795, 1875.0834)
4-Hydroxybenzoic acid	Phenolic acids	5180046	5322186	4224623	4361593	8497433	8755886		8061789	8177397	4489673	2887000	7660762	7334138		4-Hydroxybenzoic acid [ C7 H6 O3, tgt=83.74, overall=83.74 ]	(139.03598, 1940.9086)(124.037285, 13273.881)(125.04055, 636.91003)(157.06906, 4455.381)(138.05336, 1294052.2)(139.34247, 56505.934)(140.05733, 8592.465)(146.2686, 8798.971)(147.02113, 7262.0103)
1-Sinapoyl-2-feruloylgentiobiose	Phenolic acids	331655	338411	799497	782806	545539	558628		505402	480414	3000777	2948393	593564	530462		1-Sinapoyl-2-feruloylgentiobiose [ C33 H40 O18, tgt=58.83, overall=58.83 ]	(724.2296, 2993.91)(725.2302, 24300.418)(726.23303, 5968.8027)(727.23566, 1201.77)(707.8906, 4243.19)(708.22156, 810.615)(725.2501, 13571.596)(726.25287, 2703.9773)(753.2267, 5342.876)
Rosmarinic acid	Phenolic acids	295665	337908	563213	542147	485082	439554		1121304	1093747	2331341	2278182	435690	491931		Rosmarinic acid [ C18 H16 O8, tgt=58.03, overall=58.03 ]	(362.75793, 7299.277)(363.75922, 4064.4111)(365.1022, 4033.76)(343.073, 12612.33)(364.49817, 323673.84)(365.9023, 147047.86)(366.10312, 59970.203)(344.55737, 22682.803)(346.09207, 4043.9)(347.08975, 1124.9615)(360.108, 3618.2148)(383.773, 67291.52)(384.07614, 7922.2295)(385.0786, 781.7545)(369.07266, 314.02502)
3-Hydroxybenzoic acid	Phenolic acids	5180046	5322186	4224623	4361593	8497433	8755886		8061789	8177397	4489673	2887000	7660762	7334138		3-Hydroxybenzoic acid [ C7 H6 O3, tgt=83.74, overall=83.74 ]	(139.03598, 1940.9086)(124.037285, 13273.881)(125.04055, 636.91003)(157.06906, 4455.381)(138.05336, 1294052.2)(139.34247, 56505.934)(140.05733, 8592.465)(146.2686, 8798.971)(147.02113, 7262.0103)
5-Caffeoylquinic acid	Phenolic acids	2603289	2720658	4339491	4278005	3466208	3413051		7039600	7045256	10541620	10252430	3369569	3318526		5-Caffeoylquinic acid [ C16 H18 O9, tgt=71.30, overall=71.30 ]	(355.49554, 71693.13)(356.4513, 10183.9375)(357.39194, 6604.039)(359.1084, 47705.266)(337.08405, 42246.82)(338.08746, 3946.986)(339.7606, 1498.14)(357.10922, 8975.89)(338.87628, 23362.553)(339.8125, 4081.9612)(372.12836, 29631.25)(354.1176, 922.17596)(380.09067, 754.4634)(361.4131, 4945.323)(361.083, 5009.95)(362.082, 6567.68)(363.0867, 339.92)
3-Caffeoylquinic acid	Phenolic acids	2603289	2720658	4339491	4278005	3466208	3413051		7039600	7045256	10541620	10252430	3369569	3318526		3-Caffeoylquinic acid [ C16 H18 O9, tgt=71.30, overall=71.30 ]	(355.49554, 71693.13)(356.4513, 10183.9375)(357.39194, 6604.039)(359.1084, 47705.266)(337.08405, 42246.82)(338.08746, 3946.986)(339.7606, 1498.14)(357.10922, 8975.89)(338.87628, 23362.553)(339.8125, 4081.9612)(372.12836, 29631.25)(354.1176, 922.17596)(380.09067, 754.4634)(361.4131, 4945.323)(361.083, 5009.95)(362.082, 6567.68)(363.0867, 339.92)
Isoferulic acid	Phenolic acids	1531513	761348	838156	1091665	1407876	865247		1548286	1610119	824101	1	1009753	1368883		Isoferulic acid [ C10 H10 O4, tgt=61.79, overall=61.79 ]	(195.0616, 37258.2)(196.06537, 3640.7366)(177.0516, 36734.25)(178.0547, 2289.99)(198.07085, 41224.816)(199.07492, 2443.6274)(177.05232, 229051.16)(178.05534, 17713.531)(217.10115, 7680.73)(199.09444, 1786.4901)(219.38464, 1397.7944)(201.04002, 19393.775)(203.0494, 42242.23)
3-Feruloylquinic acid	Phenolic acids	483072	479973	1271062	918214	732524	733388		1321606	1271910	4048660	859339	763825	719169		3-Feruloylquinic acid [ C17 H20 O9, tgt=72.28, overall=72.28 ]	(369.1087, 17589.18)(370.86536, 57113.098)(372.1193, 9010.54)(351.90167, 10157.131)(352.10168, 909.94403)(371.4176, 127572.12)(372.4198, 19395.604)(373.6277, 5857.215)(353.2264, 7651.3716)(354.117, 1265.6575)(386.19885, 8338.034)(370.0097, 79678.11)(376.09457, 4332.62)(377.09616, 870.305)
Ferulic acid	Phenolic acids	1531513	761348	838156	1091665	1407876	865247		1548286	1610119	824101	1	1009753	1368883		Ferulic acid [ C10 H10 O4, tgt=61.79, overall=61.79 ]	(195.0616, 37258.2)(196.06537, 3640.7366)(177.0516, 36734.25)(178.0547, 2289.99)(198.07085, 41224.816)(199.07492, 2443.6274)(177.05232, 229051.16)(178.05534, 17713.531)(217.10115, 7680.73)(199.09444, 1786.4901)(219.38464, 1397.7944)(201.04002, 19393.775)(203.0494, 42242.23)
5-Feruloylquinic acid	Phenolic acids	483072	479973	1271062	918214	732524	733388		1321606	1271910	4048660	859339	763825	719169		5-Feruloylquinic acid [ C17 H20 O9, tgt=72.28, overall=72.28 ]	(369.1087, 17589.18)(370.86536, 57113.098)(372.1193, 9010.54)(351.90167, 10157.131)(352.10168, 909.94403)(371.4176, 127572.12)(372.4198, 19395.604)(373.6277, 5857.215)(353.2264, 7651.3716)(354.117, 1265.6575)(386.19885, 8338.034)(370.0097, 79678.11)(376.09457, 4332.62)(377.09616, 870.305)
Caffeic acid ethyl ester	Phenolic acids	1	1	1	1	1	1		1	1	156050	275758	1	1		Caffeic acid ethyl ester [ C11 H12 O4, tgt= ]	(209.07573, 30818.049)(210.07909, 1369.84)(195.0747, 5283.925)(191.06764, 169143.5)(192.07063, 12928.566)(213.1084, 4394.544)(234.7412, 249.08667)
Feruloyl tartaric acid	Phenolic acids	1	1	1	1	141986	135713		184351	182349	110159	351159	1	137977		Feruloyl tartaric acid [ C14 H14 O9, tgt=72.94, overall=72.94 ]	(331.07336, 16292.832)(309.0518, 584.29)(327.07266, 1088.022)(311.06882, 29292.15)(312.07166, 1150.3282)(347.1061, 8415.327)(326.087, 10005.933)(349.389, 10869.0)(350.05722, 868.388)
Caffeic acid	Phenolic acids	1	786045	1	1535870	13969075	13694189		21891956	21818024	25497980	26267050	13268722	12678359		Caffeic acid [ C9 H8 O4, tgt=47.62, overall=47.62 ]	(181.0466, 26004.53)(182.0495, 5544.76)(166.6431, 68578.04)(183.62672, 15847.164)(183.05391, 18878.01)(163.83919, 425749.5)(164.0397, 37854.0)(165.04337, 2000.2039)(201.0835, 3343.185)(205.81822, 3538.559)
Gallic acid 4-O-glucoside	Phenolic acids	164244	202521	869900	261076	1011282	587088		1044456	250418	103656	875543	683849	87049		Gallic acid 4-O-glucoside [ C13 H16 O10, tgt=71.33, overall=71.33 ]	(335.77554, 10045.999)(334.0831, 3552.79)(335.0809, 1613.26)(319.077, 1760.2633)(333.88495, 14268.557)(336.0895, 2150.3667)(318.5794, 1253.15)(353.11426, 2801.8215)(354.1168, 902.01666)(334.60526, 17186.53)(334.1039, 14586.97)(356.56796, 4218.099)(360.0719, 267.51)(337.0516, 9553.104)(338.3898, 712.0967)(339.0521, 1017.44)
Sinapine	Phenolic acids	559941	566526	1	1	1	1		585750	578668	19931596	19753812	1	1		Sinapine [ C16 H24 N O5, tgt=71.82, overall=71.82 ]	(313.17233, 15047.209)(314.17523, 1624.443)(333.15314, 20350.348)(334.156, 923.5622)(317.15012, 16497.406)(318.1514, 1650.1)
4-Hydroxybenzoic acid 4-O-glucoside	Phenolic acids	1706980	1732289	2965914	3028376	2216742	2203212		2108839	1	3722345	3650078	2181279	2193985		4-Hydroxybenzoic acid 4-O-glucoside [ C13 H16 O8, tgt=47.63, overall=47.63 ]	(301.70123, 9506.619)(302.08716, 612.36334)(286.0865, 281.2)(303.0995, 43339.805)(304.1029, 3235.9539)(285.37692, 95539.51)(286.0931, 9569.295)(318.51993, 82605.43)(301.9896, 13001.274)(301.11084, 463.875)(323.06912, 234029.25)(324.07178, 22121.271)(325.0747, 1813.7914)
3,4-Diferuloylquinic acid	Phenolic acids	1	1	309708	1	1	1		2924748	2875155	2196735	2031820	1793478	1761761		3,4-Diferuloylquinic acid [ C27H28O12, tgt= ]	(545.9603, 8111.7017)(548.1726, 3015.205)(529.0343, 698.6175)(547.17017, 17128.469)(548.1729, 2891.505)(531.1665, 611.24)(562.5254, 17509.701)(565.1963, 1806.625)(566.19946, 227.82)(544.75305, 37755.26)(545.7987, 8896.074)(546.6921, 1018.72)(553.1476, 668.145)
Avenanthramide K	Phenolic acids	5158784	5726594	8055498	401391	6754495	6599845		3324152	3372177	842852	13134375	6582699	6696852		Avenanthramide K [ C16 H13 N O6, tgt=63.34, overall=63.34 ]	(318.7996, 4307.4697)(299.0681, 926.09)(319.6648, 6834.4346)(320.4259, 4408.8237)(321.09308, 2302.0774)(302.92654, 20198.014)(333.1096, 31571.857)(334.1098, 3323.5735)(335.09863, 1269.54)(315.09952, 51215.31)(316.10004, 5762.126)(317.0967, 7123.643)(318.0985, 597.88)(340.44434, 3433.9463)
Ellagic acid arabinoside	Phenolic acids	1	1	245636	231494	298011	285624		164960	1	323415	1	251402	231809		Ellagic acid arabinoside [ C19 H14 O12, tgt= ]	(435.38528, 9758.253)(436.05112, 1061.6771)(436.05908, 2123.555)(457.0335, 1940.8374)
Hydroxycaffeic acid	Phenolic acids	6571650	6089608	6162488	5987546	4307928	3942060		4031230	4020461	1905075	1997020	4017428	4123971		Hydroxycaffeic acid [ C9 H8 O5, tgt=54.52, overall=54.52 ]	(197.04489, 579.87)(219.02364, 217323.11)(220.02637, 9204.522)(221.02203, 11107.085)(222.02505, 827.46)
24-Methylenecholestanol ferulate	Phenolic acids	2669090	2568410	3955688	3612910	3743901	3331994		3272167	1583740	2595831	7035851	3481466	3158992		24-Methylenecholestanol ferulate [ C38 H57 O4, tgt=84.84, overall=84.84 ]	(595.46234, 10174.425)(596.46515, 3161.0)(600.65875, 15058.353)(602.4172, 9334.57)(603.4197, 471.61)(583.4062, 232917.28)(584.4096, 90155.695)(585.4126, 13523.066)(586.4141, 1287.2413)
Feruloyl glucose	Phenolic acids	1322262	1315044	1362913	1401483	925160	915746		6439042	5104975	1099360	1132385	1159958	1170023		Feruloyl glucose [ C16 H20 O9, tgt=63.76, overall=63.76 ]	(357.91302, 11190.57)(360.1169, 4766.79)(339.4588, 113789.64)(340.10266, 16250.8125)(341.10925, 6435.726)(342.1101, 1668.35)(359.12433, 2002.208)(360.6266, 230.3625)(361.1284, 5491.81)(341.1139, 28045.936)(342.31693, 11275.1455)(344.1177, 2587.01)(374.14178, 14965.089)(375.1553, 462.12)(356.9035, 8679.366)(360.14307, 1119.975)(381.17374, 14186.574)(382.4429, 3229.8115)(364.45468, 72601.38)(366.00…
4-Sinapoylquinic acid	Phenolic acids	669868	697474	884052	877642	686142	686417		385525	377923	209967	750554	664863	653303		4-Sinapoylquinic acid [ C18 H22 O10, tgt=93.94, overall=93.94 ]	(399.11978, 2589.36)(401.134, 11246.48)(381.10904, 8776.714)(382.11206, 1378.0725)(383.124, 16422.57)(400.58606, 59026.47)(401.80453, 11256.551)(403.13876, 18733.852)(404.13763, 1048.8201)(383.12473, 108916.41)(384.12732, 13371.747)(417.32913, 6843.603)(400.65134, 503196.75)(401.8469, 98308.7)(403.15588, 12900.335)(423.1186, 1088.5443)
Avenanthramide 2p	Phenolic acids	1496914	1399413	1755002	1734095	1788934	1731678		1441160	1459294	1	1	1	1		Avenanthramide 2p [ C16 H13 N O5, tgt=51.83, overall=51.83 ]	(300.41263, 355.47665)(281.06485, 3148.8052)(303.0989, 2630.89)(317.1124, 49307.11)(318.1155, 4399.067)(319.1096, 2947.6965)(299.10495, 10043.65)(300.10815, 1559.99)(301.1065, 263.7)(323.0687, 35726.58)(324.07184, 4749.094)(325.07758, 1503.755)(305.06213, 1515.995)
2,4-Dihydroxybenzoic acid	Phenolic acids	1	1	1	1	1	1		1	1	1	1	93435	1		2,4-Dihydroxybenzoic acid [ C7H6O4, tgt= ]	(173.061, 434.9)(182.028, 6005.67)
Galloyl glucose	Phenolic acids	164244	202521	1	1	1	1		1044456	250418	1	1	1	1		Galloyl glucose [ C13 H16 O10, tgt=71.33, overall=71.33 ]	(336.0837, 7417.5283)(319.0785, 3166.38)(333.88446, 17875.115)(336.08975, 2604.59)(318.4133, 1153.12)(353.11426, 4055.4065)(354.1144, 1643.2)(334.60675, 508.055)(355.06366, 6936.305)(337.05197, 10447.246)(338.0587, 690.82)(339.0521, 1017.44)
p-Coumaroylquinic acid	Phenolic acids	453985	1075738	1	1911315	1458313	1423321		1088868	1052838	1	5481069	1519737	2445932		p-Coumaroylquinic acid [ C16 H18 O8, tgt=65.44, overall=65.44 ]	(339.46463, 113983.49)(340.10287, 23592.14)(341.10864, 5320.594)(321.36356, 9869.683)(324.3525, 2361.97)(341.11407, 20001.45)(342.1182, 3303.3)(324.7734, 4333.192)(324.1071, 1784.98)(358.07605, 16072.272)(360.1431, 283.12)(342.13324, 4573.006)(364.9117, 143052.69)(366.0351, 19903.145)(366.0972, 10414.59)(344.26654, 2985.969)(347.0889, 612.4)
Valoneic acid dilactone	Phenolic acids	1	1	1	1	1	1		1	1	1	1	1	1		Valoneic acid dilactone [ C21 H10 O13, tgt= ]
Dihydrocaffeic acid	Phenolic acids	1035752	999340	2151338	2223895	2010096	1917067		5387647	5531716	1	6484705	1812823	1869081		Dihydrocaffeic acid [ C9 H10 O4, tgt=76.17, overall=76.17 ]	(185.46387, 20497.844)(186.3521, 2451.6973)(187.068, 5119.8)(165.05202, 38594.316)(166.05267, 1425.02)(184.85422, 9744.063)(185.5727, 7174.195)(186.073, 11674.45)(165.83755, 33937.816)(166.05128, 2707.2576)(182.12892, 151993.36)(183.08185, 11920.774)(184.08421, 1338.4166)(209.44872, 10298.289)(210.05737, 24349.158)(190.04677, 817.02496)
4-Hydroxyphenylacetic acid	Phenolic acids	1487620	564068	432449	418540	447772	475954		1844118	1289836	1	440988	496148	414111		4-Hydroxyphenylacetic acid [ C8 H8 O3, tgt=65.47, overall=65.47 ]	(153.0495, 4296.455)(137.226, 4570.0864)(139.0499, 676.09)(155.0613, 2856.4534)(138.05304, 931225.25)(139.05563, 109683.234)(140.05763, 8836.747)(171.1737, 4885.581)(171.0774, 490.675)(154.5748, 4334.335)(160.03458, 1494.322)
Ellagic acid acetyl-xyloside	Phenolic acids	1	1	1	1	1	1		1	1	1	1	1	1		Ellagic acid acetyl-xyloside [ C21 H16 O13, tgt= ]	(463.06094, 1458.3234)(460.39438, 929.5534)(485.05487, 1431.515)
Protocatechuic acid 4-O-glucoside	Phenolic acids	153447	1436185	1872909	1915361	1	2405654		1200462	1223054	1	2498143	2351271	2364638		Protocatechuic acid 4-O-glucoside [ C13 H16 O9, tgt=45.75, overall=45.75 ]	(320.18213, 4110.817)(321.09348, 753.45)(302.6787, 8504.469)(319.0948, 50241.113)(320.09445, 5737.5596)(321.09445, 687.51337)(301.08423, 1272.0867)(334.11072, 2604.722)(335.11237, 102.18)(316.92206, 35029.797)(317.0966, 16981.62)(318.0985, 606.94)(341.9128, 6561.587)(342.98495, 2642.9036)(343.08, 5651.7)(322.39615, 356.65002)
4-p-Coumaroylquinic acid	Phenolic acids	453985	1075738	1	1911315	1458313	1423321		1088868	1052838	1	5481069	1519737	2445932		4-p-Coumaroylquinic acid [ C16 H18 O8, tgt=65.44, overall=65.44 ]	(339.46463, 113983.49)(340.10287, 23592.14)(341.10864, 5320.594)(321.36356, 9869.683)(324.3525, 2361.97)(341.11407, 20001.45)(342.1182, 3303.3)(324.7734, 4333.192)(324.1071, 1784.98)(358.07605, 16072.272)(360.1431, 283.12)(342.13324, 4573.006)(364.9117, 143052.69)(366.0351, 19903.145)(366.0972, 10414.59)(344.26654, 2985.969)(347.0889, 612.4)
3-p-Coumaroylquinic acid	Phenolic acids	453985	1075738	1	1911315	1458313	1423321		1088868	1052838	1	5481069	1519737	2445932		3-p-Coumaroylquinic acid [ C16 H18 O8, tgt=65.44, overall=65.44 ]	(339.46463, 113983.49)(340.10287, 23592.14)(341.10864, 5320.594)(321.36356, 9869.683)(324.3525, 2361.97)(341.11407, 20001.45)(342.1182, 3303.3)(324.7734, 4333.192)(324.1071, 1784.98)(358.07605, 16072.272)(360.1431, 283.12)(342.13324, 4573.006)(364.9117, 143052.69)(366.0351, 19903.145)(366.0972, 10414.59)(344.26654, 2985.969)(347.0889, 612.4)
2,3-Dihydroxybenzoic acid	Phenolic acids	1	1	1	1	1	1		1	1	1	1	93435	1		2,3-Dihydroxybenzoic acid [ C7H6O4, tgt= ]	(173.061, 434.9)(182.028, 6005.67)
Homovanillic acid	Phenolic acids	1035752	999340	2151338	2223895	2010096	1917067		5387647	5531716	1	6484705	1812823	1869081		Homovanillic acid [ C9 H10 O4, tgt=76.17, overall=76.17 ]	(185.46387, 20497.844)(186.3521, 2451.6973)(187.068, 5119.8)(165.05202, 38594.316)(166.05267, 1425.02)(184.85422, 9744.063)(185.5727, 7174.195)(186.073, 11674.45)(165.83755, 33937.816)(166.05128, 2707.2576)(182.12892, 151993.36)(183.08185, 11920.774)(184.08421, 1338.4166)(209.44872, 10298.289)(210.05737, 24349.158)(190.04677, 817.02496)
Caffeoyl aspartic acid	Phenolic acids	1	3349527	3018679	3015972	4936997	1		225319	220653	1	4173347	4903220	4989287		Caffeoyl aspartic acid [ C13 H13 N O7, tgt=69.71, overall=69.71 ]	(296.0689, 19618.293)(280.06424, 3552.9531)(298.08234, 1647.815)(317.11548, 20978.633)(318.11777, 5128.3574)(299.10452, 6972.997)(322.70514, 7522.7295)(303.17944, 86489.016)(302.05432, 54602.23)(303.05615, 41930.402)(304.0587, 6248.33)(305.06396, 2022.4401)
Homoveratric acid	Phenolic acids	1	1	1	1	1	1		1	1	1	1	1	1		Homoveratric acid [ C10 H12 O4, tgt= ]	(197.07759, 4622.671)(179.06572, 23317.607)(180.07346, 2026.0901)(216.1136, 495.535)
1,2,2'-Trisinapoylgentiobiose	Phenolic acids	1	1	1	1	1	1		1	1	1	1	1	1		1,2,2'-Trisinapoylgentiobiose [ C45 H52 O23, tgt= ]	(961.31555, 9765.11)(962.3184, 3092.367)(963.3229, 398.89)
5-p-Coumaroylquinic acid	Phenolic acids	453985	1075738	1	1911315	1458313	1423321		1088868	1052838	1	5481069	1519737	2445932		5-p-Coumaroylquinic acid [ C16 H18 O8, tgt=65.44, overall=65.44 ]	(339.46463, 113983.49)(340.10287, 23592.14)(341.10864, 5320.594)(321.36356, 9869.683)(324.3525, 2361.97)(341.11407, 20001.45)(342.1182, 3303.3)(324.7734, 4333.192)(324.1071, 1784.98)(358.07605, 16072.272)(360.1431, 283.12)(342.13324, 4573.006)(364.9117, 143052.69)(366.0351, 19903.145)(366.0972, 10414.59)(344.26654, 2985.969)(347.0889, 612.4)
24-Methylcholestanol ferulate	Phenolic acids	3616273	3300113	4967461	4556080	4737928	4530683		7961038	8537059	1	12185833	4731873	4300562		24-Methylcholestanol ferulate [ C38 H58 O4, tgt=55.01, overall=55.01 ]	(597.4771, 1851.7266)(601.4142, 97716.03)(602.4175, 20576.95)(603.4206, 1492.0549)(583.40643, 259813.66)(584.4094, 98015.17)(585.41174, 14213.785)(586.4141, 1308.1514)
Ellagic acid acetyl-arabinoside	Phenolic acids	1	1	1	1	1	1		1	1	1	1	1	1		Ellagic acid acetyl-arabinoside [ C21 H16 O13, tgt= ]	(463.06094, 1458.3234)(460.39438, 929.5534)(485.05487, 1431.515)
Gentisic acid	Phenolic acids	355028	369253	399940	387511	496629	482117		1	1	1	1	93435	458296		Gentisic acid [ C7 H6 O4, tgt=47.54, overall=47.54 ]	(155.02945, 2037.1328)(137.02069, 12750.531)(173.06238, 1105.19)(178.81972, 11104.717)
3,5-Dihydroxybenzoic acid	Phenolic acids	355028	369253	399940	387511	496629	482117		1	1	1	1	93435	458296		3,5-Dihydroxybenzoic acid [ C7 H6 O4, tgt=47.54, overall=47.54 ]	(155.02945, 2037.1328)(137.02069, 12750.531)(173.06238, 1105.19)(178.81972, 11104.717)
Protocatechuic acid	Phenolic acids	355028	369253	399940	387511	496629	482117		1	1	1	1	93435	458296		Protocatechuic acid [ C7 H6 O4, tgt=47.54, overall=47.54 ]	(155.02945, 2037.1328)(137.02069, 12750.531)(173.06238, 1105.19)(178.81972, 11104.717)
2,6-Dihydroxybenzoic acid	Phenolic acids	355028	369253	399940	387511	496629	482117		1	1	1	1	93435	458296		2,6-Dihydroxybenzoic acid [ C7 H6 O4, tgt=47.54, overall=47.54 ]	(155.02945, 2037.1328)(137.02069, 12750.531)(173.06238, 1105.19)(178.81972, 11104.717)
Ixerisoside?C	Sesquiterpene lactones	3196328	3234412	6118424	6072121	6410947	6439593		9440571	5101477	8977225	8625100	3647935	3447884		Ixerisoside?C [ C21 H30 O9, tgt=91.22, overall=91.22 ]	(427.5873, 28740.45)(428.59454, 22555.29)(429.60263, 15265.317)(430.20444, 2104.9968)(408.5477, 61219.875)(410.05435, 20066.148)(411.19196, 53941.46)(412.19458, 8186.0234)(429.20084, 29714.861)(430.20422, 3973.1687)(431.21173, 2085.974)(411.19244, 638108.2)(412.19568, 127365.59)(413.1963, 31749.025)(414.1984, 2449.4978)(449.1787, 1205.645)(433.3729, 4176.414)(435.1742, 276.09)
Ixerisoside?D	Sesquiterpene lactones	3543083	3695290	6495258	6708791	3940172	3971223		7587807	7962939	12192337	11574779	4122385	3856417		Ixerisoside?D [ C21 H28 O8, tgt=91.22, overall=91.22 ]	(408.68002, 86010.195)(410.18002, 25802.666)(411.19217, 132304.34)(412.1948, 12094.84)(411.19287, 793131.5)(412.19608, 149314.9)(413.3634, 26964.592)(414.1985, 2175.644)(431.1666, 1256.422)(432.1828, 148.8)(417.16415, 10068.996)(418.16855, 913.00336)
nonanale	Sesquiterpene lactones	460342	445543	247432	250813	400198	404288		568531	575325	253625	249363	380294	379797		nonanale [ C9 H18 O, tgt=76.05, overall=76.05 ]	(165.1246, 37864.01)(166.12813, 3755.1099)(147.11417, 12404.603)(148.1174, 407.2)
Ixerisoside?F	Sesquiterpene lactones	18812680	19121524	20050092	22611550	1	21630918		1	23152912	25508692	23892078	19639734	1		Ixerisoside?F [ C31 H42 O13, tgt=63.11, overall=63.11 ]	(622.2655, 304099.0)(623.26764, 53460.773)(624.2691, 4995.744)(606.2709, 730.96)(645.24567, 90144.06)(646.2449, 15544.667)(647.239, 2584.47)(627.2319, 24617.559)(628.2346, 5400.29)
Ixerisoside?G	Sesquiterpene lactones	22472464	22142912	25736248	26905386	26253780	29665364		30071266	29852832	24293712	22886944	22858822	21675894		Ixerisoside?G [ C30 H40 O12, tgt=54.03, overall=54.03 ]	(592.2545, 47299.48)(593.3544, 293400.6)(594.3573, 107748.586)(595.2728, 33140.133)(596.2745, 2664.7217)(615.2481, 26265.354)(616.25055, 7424.7188)(617.2533, 672.645)
Ixerisoside?H	Sesquiterpene lactones	165269	190245	842775	832467	590876	574696		1221604	1242268	552827	570573	567722	550813		Ixerisoside?H [ C35 H48 O14, tgt=58.51, overall=58.51 ]	(679.31854, 2627.8066)(711.34375, 2770.1514)(694.58545, 19133.705)(696.2552, 16657.65)(696.89154, 5715.929)(697.48, 19827.473)(697.33685, 20196.01)(698.3349, 3196.7986)
Ixerisoside?I	Sesquiterpene lactones	3976145	3979013	3594478	3661268	8471003	8661679		1	2189163	3241038	3205951	8426777	8161099		Ixerisoside?I [ C21 H32 O10, tgt=52.19, overall=52.19 ]	(446.19977, 6827.6743)(446.8728, 1153.9132)(447.2109, 5902.21)(427.18753, 338891.66)(428.19043, 54802.723)(429.19748, 18069.693)(447.21, 3184.71)(429.20023, 41694.277)(430.20343, 6723.3984)(431.2132, 3546.68)(467.68912, 25152.537)(468.68988, 4944.5366)
Ixerisoside?J	Sesquiterpene lactones	1056324	1115973	698703	733936	1263790	1285195		308642	307994	331624	272126	1019047	1074279		Ixerisoside?J [ C27 H44 O12, tgt=89.17, overall=89.17 ]	(561.1669, 22885.809)(562.31354, 5738.7886)(563.312, 2003.9788)(585.2779, 6624.965)(586.2807, 933.635)(587.28973, 649.735)
Ixerisoside?K	Sesquiterpene lactones	545401	515153	210965760	581961	229467408	237181648		4999055	5173129	4358905	4284208	469059	426069		Ixerisoside?K [ C31 H44 O13, tgt=57.80, overall=57.80 ]	(624.279, 56438.383)(625.2821, 9186.383)(626.2845, 1003.745)(606.2721, 5930.357)(607.2823, 964360.2)(608.28503, 392690.94)(609.2885, 196066.5)(610.2912, 46883.047)(611.29254, 2819.1868)(647.2639, 17943.037)(648.2661, 3191.505)(629.2635, 206979.05)(630.2667, 119781.04)(631.2696, 62112.86)(632.27106, 5263.18)
stoebenolide	Sesquiterpene lactones	278033	253000	507513	423101	255049	247417		1257298	1242682	5059106	4943867	243828	302304		stoebenolide [ C15 H20 O5, tgt=68.94, overall=68.94 ]	(280.73242, 5089.9614)(263.12155, 56577.582)(264.12448, 4865.048)(283.1456, 236.28)(263.12778, 19793.23)(264.1316, 3768.29)(289.1212, 107936.484)(290.12436, 11072.636)
Ixerisoside?N	Sesquiterpene lactones	376228	429747	525686	513637	386383	395087		227348	221597	341418	235752	415470	380863		Ixerisoside?N [ C27 H42 O12, tgt=70.50, overall=70.50 ]	(559.2631, 15570.357)(560.26654, 5061.64)(544.2726, 4323.415)(545.28094, 3116.5032)(559.2946, 10908.532)(560.29675, 2880.8008)
Ixerisoside?M	Sesquiterpene lactones	6982052	7213638	9115493	9713522	11326975	12367078		8938927	8960538	1667448	1	10511527	10187836		Ixerisoside?M [ C30 H38 O12, tgt=91.90, overall=91.90 ]	(591.60547, 91983.42)(592.25397, 34979.543)(593.2674, 382181.66)(594.2705, 141706.19)(595.2731, 33406.65)(596.2747, 2879.0828)(613.23175, 4854.624)(614.2349, 658.7617)
Radiatin	Sesquiterpene lactones	6116536	5765442	1	12617573	12650205	4160537		9993527	10011105	13354442	14039743	12585905	11913723		Radiatin [ C19 H24 O6, tgt=71.17, overall=71.17 ]	(349.6624, 3532.535)(351.17188, 463.15002)(331.1561, 5178.8)(375.15488, 19041.15)(376.15906, 2247.9265)(357.1468, 577816.94)(358.14972, 79754.78)
Baileyin	Sesquiterpene lactones	1627154	1640949	1436995	1440648	1311022	1272515		1676923	1684962	1649171	1679793	1307619	1273653		Baileyin [ C15 H20 O4, tgt=60.82, overall=60.82 ]	(247.12675, 49186.812)(248.1299, 3945.8254)(267.15207, 631.1909)
11beta-hydroxydeacetylmatricarin-8-O-beta-D-glucopyranoside	Sesquiterpene lactones	4839509	4978497	1	6619540	798509	705972		9294057	9385593	9703819	1351469	822722	792431		11beta-hydroxydeacetylmatricarin-8-O-beta-D-glucopyranoside [ C21 H28 O10, tgt=61.59, overall=61.59 ]	(442.56952, 15089.292)(443.17868, 17185.826)(444.1828, 497.86)(424.79123, 7408.522)(443.18103, 46381.715)(444.1836, 6798.6177)(425.439, 83110.945)(426.1716, 20222.596)(427.17725, 38338.926)(428.1819, 7139.1)(458.48767, 4849.362)(441.2004, 10279.435)(464.66284, 784.03503)(465.1669, 1918.36)(446.75537, 1300.602)(447.1546, 814.22)
(1R,3S,4S,5S,6S,7R,8S)-4beta-(chloromethyl)-3beta,4alpha-dihydroxy-8alpha-(3-formyl-2-methyl-prope-noyloxy)-1alphaH,5alphaH,6betaH,7alphaH-guai-10(14),11(13)-dien-6,12-olide	Sesquiterpene lactones	694472	616092	1001022	397464	12058698	12065058		618469	591117	1889321	1767568	442828	11745704		(1R,3S,4S,5S,6S,7R,8S)-4beta-(chloromethyl)-3beta,4alpha-dihydroxy-8alpha-(3-formyl-2-methyl-prope-noyloxy)-1alphaH,5alphaH,6betaH,7alphaH-guai-10(14),11(13)-dien-6,12-olide [ C20 H23 Cl O7, tgt=61.25, overall=61.25 ]	(411.4152, 5996.4873)(413.1131, 18865.74)(414.1138, 3437.92)(394.93686, 3624.1084)(411.45337, 34519.766)(412.4542, 17711.629)(414.1162, 4166.19)(395.36337, 118199.625)(394.11224, 28505.066)(395.12155, 6861.6665)(429.0894, 6916.3916)(431.1486, 5266.48)(414.54193, 27806.885)(415.78653, 10174.524)(415.648, 9223.915)(439.11395, 1730.4374)(421.1029, 3502.055)
acidop-cumarico	Sesquiterpene lactones	1278690	1365628	2850095	2924206	2642012	2521003		6243560	6403915	7755645	7550842	2559588	2416222		acidop-cumarico [ C9 H8 O3, tgt=69.59, overall=69.59 ]	(165.05193, 42358.055)(166.72246, 1126.2067)(147.04135, 45543.523)(148.0437, 41119.43)(149.046, 1615.44)(165.80482, 25023.94)(166.04779, 1873.6887)(149.57755, 153291.06)(150.41061, 13381.764)(150.25034, 37351.29)(182.21254, 131974.55)(183.0819, 11747.3955)(184.08374, 1184.154)(164.78711, 19843.035)(165.07446, 3103.515)(166.0673, 1422.3125)(190.04596, 516.202)(173.03908, 3522.9028)
deoxyelephantopin	Sesquiterpene lactones	13323974	13652693	21995278	21514114	3428700	3409087		22900376	22845616	49153692	43763328	3407311	3270416		deoxyelephantopin [ C19 H20 O6, tgt=68.16, overall=68.16 ]	(349.13953, 4989.7163)(327.78644, 107195.0)(327.12323, 30330.613)(328.1207, 3776.1448)(350.1433, 455.77)(331.13013, 32706.424)(332.13245, 4648.9497)(346.9701, 14549.079)(347.1544, 14455.864)(371.1257, 169797.02)(372.1282, 19753.17)(353.11444, 16489.271)(354.11768, 3303.5935)
Cebellin O	Sesquiterpene lactones	16419417	16762020	9729319	9684980	8653433	8750090		10692336	10697879	13207207	13120501	8567689	8552740		Cebellin O [ C19 H25 O5, tgt=60.97, overall=60.97 ]	(335.3912, 3093.2937)(338.18674, 1011.625)(351.71048, 553560.06)(352.49826, 105665.99)(353.21362, 13527.65)(354.216, 766.82)(333.1983, 11767.17)(359.83524, 11507.204)(361.1711, 744.59)(342.96515, 10957.604)(343.1668, 4683.8)
(1E,4Z)-15-hydroxy-8alpha-O-(4'-acetoxy-3'-hydroxy-2'-methylidenebutanoyl)-6betaH,7alphaH-germacra-1,4,11(13)-trien-6,12-olide	Sesquiterpene lactones	1608781	3661482	6417694	5961981	2745040	2684902		9387009	8628486	16558319	16354932	2779173	2645328		(1E,4Z)-15-hydroxy-8alpha-O-(4'-acetoxy-3'-hydroxy-2'-methylidenebutanoyl)-6betaH,7alphaH-germacra-1,4,11(13)-trien-6,12-olide [ C20 H22 O6, tgt=55.27, overall=55.27 ]	(362.48703, 3564.4736)(360.1432, 315.18)(344.8928, 6673.791)(345.1445, 7596.3)(359.1529, 2447.64)(377.5132, 2054.0598)(378.1865, 226.73502)(361.1762, 10552.24)(362.17953, 5320.489)(363.17908, 972.23)(385.1404, 56539.973)(386.1433, 6258.8696)(367.1299, 22842.88)(368.13184, 5638.891)
Viguiestenin	Sesquiterpene lactones	1342241	2173225	6432474	2158655	2155908	2342500		4591971	20757084	25269220	3256275	2629421	2730128		Viguiestenin [ C21 H28 O7, tgt=84.67, overall=84.67 ]	(393.07758, 164383.94)(394.1853, 28933.38)(395.1945, 54960.312)(397.2014, 3211.69)(395.19812, 606012.8)(396.20132, 131078.23)(397.20328, 19609.049)(398.20505, 2923.1987)(375.18344, 107952.66)(376.18506, 7492.6997)(414.22516, 2747.605)(419.18234, 89156.62)(420.18518, 11097.295)(401.1712, 74887.84)(402.17407, 9054.14)
Linifolin A	Sesquiterpene lactones	448995	434627	71225360	604911	684590	680560		420710	427897	2323774	17553156	665741	631896		Linifolin A [ C17 H20 O5, tgt=53.53, overall=53.53 ]	(304.13425, 22361.594)(305.1459, 4325.72)(287.13126, 2083.644)(307.16333, 3955.3823)(330.08603, 36999.74)(330.73975, 4718.075)(312.61887, 867.73376)
Anthemolide A	Sesquiterpene lactones	10503505	10809947	2013618	2002017	19936498	17735252		2263210	2318158	4928295	4772589	2664789	2088899		Anthemolide A [ C17 H22 O6, tgt=53.48, overall=53.48 ]	(304.13434, 21858.678)(305.14755, 3504.47)(348.50748, 17504.988)(349.04944, 1025.7727)(330.55817, 127562.14)(331.56033, 12068.23)
Anthemolide B	Sesquiterpene lactones	321110	1543548	1276250	1639316	1508767	1482748		1929748	1	523444	3754362	1508288	1470235		Anthemolide B [ C15 H20 O7, tgt=60.94, overall=60.94 ]	(313.11993, 3145.5825)(295.03433, 171768.83)(296.11386, 18221.92)(297.11752, 1903.8862)(315.1362, 28533.463)(316.1391, 2678.827)(330.15482, 44779.11)(331.1566, 6039.091)(336.44882, 1461.7051)(318.85522, 10067.795)(321.1084, 1905.18)
Anthemolide C	Sesquiterpene lactones	10503505	10809947	2013618	2002017	19936498	17735252		2263210	2318158	4928295	4772589	2664789	2088899		Anthemolide C [ C17 H22 O6, tgt=53.48, overall=53.48 ]	(304.13434, 21858.678)(305.14755, 3504.47)(348.50748, 17504.988)(349.04944, 1025.7727)(330.55817, 127562.14)(331.56033, 12068.23)
Anthemolide D	Sesquiterpene lactones	847346	902951	1658751	1773700	1340470	2727971		1022825	1061697	1871216	3777810	1336144	1265056		Anthemolide D [ C19 H24 O8, tgt=60.12, overall=60.12 ]	(381.2469, 195312.52)(382.25516, 26962.092)(383.15952, 19640.266)(363.13492, 1223.4299)(383.1604, 17137.877)(384.16367, 941.32837)(365.15085, 12567.077)(366.1539, 1121.89)(398.2801, 3859.5981)(399.18448, 673.28)(380.57336, 4375.85)(405.13635, 2300.6516)(406.1396, 524.18)(388.63815, 1763.9225)
Melampodinin	Sesquiterpene lactones	1089022	99543	2130731	2154407	1519933	1472404		986360	983798	743906	752543	219638	1452353		Melampodinin [ C25 H30 O12, tgt=47.59, overall=47.59 ]	(523.1695, 1058.84)(527.1795, 1101.37)(508.1709, 425.14)(525.1863, 37040.684)(525.85394, 15202.75)(525.1842, 446.84)(507.1753, 17006.293)(508.17807, 2495.1667)(509.18805, 4411.615)(541.2157, 32007.406)(542.21967, 12213.95)(523.20386, 963.055)(546.3977, 8132.4688)(548.17206, 2646.4583)(529.15906, 724.898)
Anthemolide E	Sesquiterpene lactones	1353491	1311921	2810820	2809112	2391080	2391235		3608209	390004	6162206	6007050	2415803	2297570		Anthemolide E [ C19 H24 O9, tgt=70.30, overall=70.30 ]	(398.25958, 16130.634)(401.15646, 6333.58)(380.81906, 60284.535)(380.53485, 19975.113)(399.15588, 152822.62)(400.1585, 19120.398)(401.1654, 57749.027)(402.1678, 13905.18)(381.36972, 320867.9)(382.14944, 52655.027)(414.2365, 12327.189)(416.1832, 21957.96)(396.16418, 2403.2366)(404.12817, 826.2)(406.1352, 576.92004)
crisofanolo	Sesquiterpene lactones	6534789	6846755	4192691	4190741	2902198	2799877		1866854	1876800	1226502	1230571	2860485	2756351		crisofanolo [ C15 H10 O4, tgt=63.41, overall=63.41 ]	(258.9061, 13650.297)(238.05237, 3581.359)(255.06729, 27247.465)(256.0699, 6564.053)(274.76416, 32593.295)(277.10715, 9961.54)(254.08255, 143.8)(277.04648, 658.98)(259.03513, 68953.11)(261.02695, 3293.0862)
Anthemolide F	Sesquiterpene lactones	1877847	1	5283522	5047406	3362182	3761130		8947982	9143697	9461109	11016090	3395591	3734832		Anthemolide F [ C21 H28 O9, tgt=73.20, overall=73.20 ]	(425.57343, 144254.6)(426.64908, 30377.496)(427.4354, 66297.125)(428.18753, 12583.009)(406.41605, 12144.53)(407.17157, 2357.1348)(427.1872, 323327.34)(428.19028, 54081.32)(429.19717, 22321.148)(430.19763, 987.87)(408.98587, 222091.42)(410.1798, 45312.8)(442.20453, 4211.25)(425.20444, 996.59393)(447.1622, 3498.348)(433.15945, 918.95996)
Eupatoriopicrin	Sesquiterpene lactones	493451	494695	866483	850248	1298055	620814		1720089	1713996	3915244	3766432	1137890	1258516		Eupatoriopicrin [ C20 H26 O6, tgt=68.33, overall=68.33 ]	(363.17447, 543.252)(347.63358, 4355.796)(345.1662, 2480.59)(348.17624, 15592.828)(350.18042, 2144.82)(384.21616, 1664.965)(385.2171, 332.608)(366.20566, 649.4175)(389.17062, 15008.605)(390.1746, 2836.4814)(371.16165, 324070.34)(372.16464, 46325.52)
Heliangine	Sesquiterpene lactones	493451	494695	866483	850248	1298055	620814		1720089	1713996	3915244	3766432	1137890	1258516		Heliangine [ C20 H26 O6, tgt=68.33, overall=68.33 ]	(363.17447, 543.252)(347.63358, 4355.796)(345.1662, 2480.59)(348.17624, 15592.828)(350.18042, 2144.82)(384.21616, 1664.965)(385.2171, 332.608)(366.20566, 649.4175)(389.17062, 15008.605)(390.1746, 2836.4814)(371.16165, 324070.34)(372.16464, 46325.52)
Tenulin	Sesquiterpene lactones	6759247	933076	11756506	7444110	337279	1		2214833	4125411	14369012	445907	3861622	2753173		Tenulin [ C17 H22 O5, tgt=61.64, overall=61.64 ]	(288.1389, 1259.215)(308.82684, 1826.8932)(289.1466, 2690.4568)(306.171, 19652.05)(333.1458, 9619.39)(334.1475, 773.73)(315.1361, 60999.402)(316.13907, 6766.952)
salonitenolide	Sesquiterpene lactones	1627154	1640949	1436995	1440648	1311022	1272515		1676923	1684962	1649171	1679793	1307619	1273653		salonitenolide [ C15 H20 O4, tgt=60.82, overall=60.82 ]	(247.12675, 49186.812)(248.1299, 3945.8254)(267.15207, 631.1909)
Michelenolide	Sesquiterpene lactones	1627154	1640949	1436995	1440648	1311022	1272515		1676923	1684962	1649171	1679793	1307619	1273653		Michelenolide [ C15 H20 O4, tgt=60.82, overall=60.82 ]	(247.12675, 49186.812)(248.1299, 3945.8254)(267.15207, 631.1909)
Orizabin	Sesquiterpene lactones	5486292	5236100	10081673	15365142	7365334	7163332		8855952	8874364	43043108	54854784	6954494	20261384		Orizabin [ C19 H26 O7, tgt=52.50, overall=52.50 ]	(368.67645, 1823.4426)(348.15576, 6203.7974)(369.18158, 937.88)(351.169, 205.98)(385.2106, 148.77)(389.2098, 670.53)(366.1953, 320.27)(390.21204, 35728.547)(391.33725, 4809.965)(391.14938, 9617.043)(392.1609, 1079.11)(373.534, 17979.771)(375.0894, 1854.9246)
4-acetyl-malacitanolide	Sesquiterpene lactones	4129067	4940594	2907697	5796807	1456486	1468601		7234379	3839090	4847878	4805305	4182511	1408508		4-acetyl-malacitanolide [ C20 H26 O8, tgt=84.55, overall=84.55 ]	(395.76556, 9896.084)(397.17432, 11424.42)(397.9278, 7520.69)(379.16528, 4104.83)(397.17584, 15597.314)(398.1791, 2605.24)(379.5795, 4383.7534)(412.19574, 160752.61)(413.1987, 31644.053)(414.2035, 2397.431)(394.18567, 82551.836)(396.1984, 1341.1699)(419.1594, 1680.94)(401.14743, 1884.0736)
14-O-acetylathoin	Sesquiterpene lactones	1877847	1	5283522	5047406	3362182	3761130		8947982	9143697	9461109	11016090	3395591	3734832		14-O-acetylathoin [ C21 H28 O9, tgt=73.20, overall=73.20 ]	(425.57343, 144254.6)(426.64908, 30377.496)(427.4354, 66297.125)(428.18753, 12583.009)(406.41605, 12144.53)(407.17157, 2357.1348)(427.1872, 323327.34)(428.19028, 54081.32)(429.19717, 22321.148)(430.19763, 987.87)(408.98587, 222091.42)(410.1798, 45312.8)(442.20453, 4211.25)(425.20444, 996.59393)(447.1622, 3498.348)(433.15945, 918.95996)
1,3-Dicaffeoylquinic acid	Sesquiterpene lactones	825698	896040	1	1	1	2869635		459031	442826	1552654	1237356	1	1		1,3-Dicaffeoylquinic acid [ C25 H24 O12, tgt=26.74, overall=26.74 ]	(502.32202, 16185.403)(502.1231, 5465.5596)(503.1235, 1073.675)(537.17285, 1074.855)(538.1737, 538.44)(519.1595, 8085.452)(520.16174, 2103.085)(526.7234, 5117.432)
14-hydroxyhypocretenolide	Sesquiterpene lactones	2661909	2779832	2350637	2644552	2843879	2860454		2950769	2948115	719203	714026	2909217	2861626		14-hydroxyhypocretenolide [ C15 H16 O4, tgt=59.37, overall=59.37 ]	(261.10608, 69895.7)(262.10895, 5854.531)(243.09882, 42909.773)(243.099, 3167.9402)(263.12067, 675.223)(260.1297, 2113.29)(287.10522, 32065.26)(288.10822, 1236.24)(267.08612, 779.92365)
3,4-dihydroxyphenyl-2-oxypropanoic acid	Sesquiterpene lactones	1	786045	1	1535870	13969075	13694189		21891956	21818024	25497980	26267050	13268722	12678359		3,4-dihydroxyphenyl-2-oxypropanoic acid [ C9 H8 O4, tgt=47.62, overall=47.62 ]	(181.0466, 26004.53)(182.0495, 5544.76)(166.6431, 68578.04)(183.62672, 15847.164)(183.05391, 18878.01)(163.83919, 425749.5)(164.0397, 37854.0)(165.04337, 2000.2039)(201.0835, 3343.185)(205.81822, 3538.559)
Zaluzanin?C	Sesquiterpene lactones	1627154	1640949	197975	201745	215160	216003		1676923	1684962	1649171	1679793	213048	201372		Zaluzanin?C [ C15 H18 O3, tgt=60.82, overall=60.82 ]	(247.12677, 51519.13)(248.12996, 4187.466)(229.11864, 15763.56)(230.12354, 1271.705)(249.14148, 4197.325)(251.14403, 4489.4463)(266.1686, 2539.74)
methylhypocretenoate	Sesquiterpene lactones	448995	434627	71225360	604911	684590	680560		420710	427897	2323774	17553156	665741	631896		methylhypocretenoate [ C17 H20 O5, tgt=53.53, overall=53.53 ]	(304.13425, 22361.594)(305.1459, 4325.72)(287.13126, 2083.644)(307.16333, 3955.3823)(330.08603, 36999.74)(330.73975, 4718.075)(312.61887, 867.73376)
pirogallolo	Sesquiterpene lactones	3962576	3292305	5470068	4316081	5217633	5564885		5368933	4863097	4838377	4577731	5527728	5366290		pirogallolo [ C6 H6 O3, tgt=87.10, overall=87.10 ]	(149.02133, 223222.05)(150.024, 12756.466)(151.0264, 500.14)
Tatridin A	Sesquiterpene lactones	1627154	1640949	1436995	1440648	1311022	1272515		1676923	1684962	1649171	1679793	1307619	1273653		Tatridin A [ C15 H20 O4, tgt=60.82, overall=60.82 ]	(247.12672, 49876.29)(248.12993, 3992.4368)(267.15207, 631.1909)
8alpha-O-(4-hydroxy-2-methylenebutanoyloxy)melitensin	Sesquiterpene lactones	276625	274045	395072	433461	388689	405371		310922	317542	405766	399045	348732	309101		8alpha-O-(4-hydroxy-2-methylenebutanoyloxy)melitensin [ C20 H28 O6, tgt=81.68, overall=81.68 ]	(366.2045, 2954.41)(385.22897, 78368.48)(386.23172, 13626.819)(387.23663, 2043.95)(364.21265, 213.955)(391.18683, 793.942)(373.17493, 4429.27)(374.18054, 560.44)
Conchosin-A	Sesquiterpene lactones	2474850	2601097	2487343	2552055	2620142	2634943		2974942	2970655	2438943	2588978	2679689	2639392		Conchosin-A [ C15 H18 O5, tgt=59.37, overall=59.37 ]	(279.11578, 590.3326)(261.10602, 69989.39)(262.10892, 5772.685)(281.1316, 9320.71)(282.13474, 1335.2084)(263.12057, 614.5214)
catechina/epicatechina	Sesquiterpene lactones	977943	951626	1058087	1035233	962280	942592		1	1967435	322648	329559	1102923	936997		catechina/epicatechina [ C15 H14 O6, tgt=64.64, overall=64.64 ]	(290.7448, 4718.1147)(276.7501, 20766.26)(293.09427, 6643.2095)(294.0961, 1513.25)(275.39777, 38156.62)(276.369, 3448.5305)(308.1146, 10927.498)(309.11707, 2371.8252)(292.7739, 1239.0868)(317.5785, 1277.6499)(295.79373, 6807.422)(297.0642, 461.61)
Vernolide	Sesquiterpene lactones	2424045	2443534	22981264	22481920	4491980	4445001		23577224	23411956	50181396	49057204	4425037	4235649		Vernolide [ C19 H22 O7, tgt=68.43, overall=68.43 ]	(349.14026, 8314.728)(389.13525, 13704.298)(371.12576, 231010.7)(372.12817, 27283.547)
Pyrethrosin	Sesquiterpene lactones	6759247	933076	11756506	7444110	337279	1		2214833	4125411	14369012	445907	3861622	2753173		Pyrethrosin [ C17 H22 O5, tgt=61.64, overall=61.64 ]	(288.1389, 1259.215)(308.82684, 1826.8932)(289.1466, 2690.4568)(306.171, 19652.05)(333.1458, 9619.39)(334.1475, 773.73)(315.1361, 60999.402)(316.13907, 6766.952)
Youngiaside?C	Sesquiterpene lactones	2848184	2935007	1935101	1806088	1756982	1757003		518301	536510	1555453	1438548	1	1		Youngiaside?C [ C29 H34 O11, tgt=40.53, overall=40.53 ]	(545.2111, 692.997)(559.2254, 2128.5151)(544.7119, 2128.7761)(542.2177, 1504.72)(583.2052, 15780.703)(584.208, 5866.31)(585.20605, 4210.285)(564.4221, 14040.5)(565.3009, 7936.867)(569.2073, 2392.73)
Youngiaside?A	Sesquiterpene lactones	1877847	1	5283522	5047406	3362182	3761130		8947982	9143697	9461109	11016090	3395591	3734832		Youngiaside?A [ C21 H28 O9, tgt=73.20, overall=73.20 ]	(425.57343, 144254.6)(426.64908, 30377.496)(427.4354, 66297.125)(428.18753, 12583.009)(406.41605, 12144.53)(407.17157, 2357.1348)(427.1872, 323327.34)(428.19028, 54081.32)(429.19717, 22321.148)(430.19763, 987.87)(408.98587, 222091.42)(410.1798, 45312.8)(442.20453, 4211.25)(425.20444, 996.59393)(447.1622, 3498.348)(433.15945, 918.95996)
6alpha,8alpha,15-trihydroxyelema-1,3,11(13)-trien-12-oic acid	Sesquiterpene lactones	156425	151124	296222	290417	289297	281333		258200	249286	445175	671468	279522	272751		6alpha,8alpha,15-trihydroxyelema-1,3,11(13)-trien-12-oic acid [ C15 H21 O5, tgt=36.14, overall=36.14 ]	(282.4783, 5927.5903)(283.14706, 602.75665)(264.46735, 8244.514)(264.13037, 1561.3201)(282.89746, 3019.5)(265.13718, 2480.23)(286.1713, 13519.125)(304.12546, 10709.083)(305.12933, 1626.4)
Tetraneurin-D	Sesquiterpene lactones	1	1	1	697204	1	1		1	1	1601061	1	1	1		Tetraneurin-D [ C17H24O6, tgt= ]	(326.4938, 9950.496)(327.96533, 2075.7183)(307.14606, 5191.566)(309.1617, 1820.3433)(349.15704, 148.64)
Tetraneurin-E	Sesquiterpene lactones	1	7171932	1	697204	5045692	1		2400729	2663330	1601061	1	1	1		Tetraneurin-E [ C17 H24 O6, tgt=43.76, overall=43.76 ]	(326.4938, 9950.496)(327.96533, 2075.7183)(307.14606, 5191.566)(327.1716, 357.125)(309.1617, 1820.3433)(350.49094, 398.28)(333.14484, 724.98)
Tetraneurin-B	Sesquiterpene lactones	10503505	10809947	2013618	2002017	19936498	17735252		2263210	2318158	4928295	4772589	2664789	2088899		Tetraneurin-B [ C17 H22 O6, tgt=53.48, overall=53.48 ]	(304.13434, 21858.678)(305.14755, 3504.47)(348.50748, 17504.988)(349.04944, 1025.7727)(330.55817, 127562.14)(331.56033, 12068.23)
Tetraneurin-C	Sesquiterpene lactones	5486292	5236100	10081673	15365142	7365334	7163332		8855952	8874364	43043108	54854784	6954494	20261384		Tetraneurin-C [ C19 H26 O7, tgt=52.50, overall=52.50 ]	(368.67645, 1823.4426)(348.15576, 6203.7974)(369.18158, 937.88)(351.169, 205.98)(385.2106, 148.77)(389.2098, 670.53)(366.1953, 320.27)(390.21204, 35728.547)(391.33725, 4809.965)(391.14938, 9617.043)(392.1609, 1079.11)(373.534, 17979.771)(375.0894, 1854.9246)
Trilobolide	Sesquiterpene lactones	1657850	1576420	1	859757	774382	1		258345	271475	7319648	467178	826659	790282		Trilobolide [ C27 H38 O10, tgt=47.35, overall=47.35 ]	(526.25256, 9051.377)(527.2554, 1349.94)(508.24716, 341.69333)(529.2684, 2337.8425)(509.2473, 445.74667)(522.26697, 9955.68)(523.2689, 928.835)(545.9031, 274.55334)(530.1052, 500.90497)(533.24744, 324.43)
Tetraneurin-F	Sesquiterpene lactones	5486292	5236100	10081673	15365142	7365334	7163332		8855952	8874364	43043108	54854784	6954494	20261384		Tetraneurin-F [ C19 H26 O7, tgt=52.50, overall=52.50 ]	(368.67645, 1823.4426)(348.15576, 6203.7974)(369.18158, 937.88)(351.169, 205.98)(385.2106, 148.77)(389.2098, 670.53)(366.1953, 320.27)(390.21204, 35728.547)(391.33725, 4809.965)(391.14938, 9617.043)(392.1609, 1079.11)(373.534, 17979.771)(375.0894, 1854.9246)
Microhelenin F	Sesquiterpene lactones	1593826	1544592	674457	786415	1030282	1042717		467649	462810	542853	542349	1036470	1001042		Microhelenin F [ C14 H16 O4, tgt=63.05, overall=63.05 ]	(249.10594, 47531.637)(250.10883, 3796.2744)(251.12105, 10933.31)(252.1241, 983.525)(266.1397, 954.5)(273.1021, 769.18)
Microhelenin C	Sesquiterpene lactones	287834	959403	706038	1144574	1092716	1122347		271538	109988	675914	659561	1077062	1072034		Microhelenin C [ C20 H26 O5, tgt=55.41, overall=55.41 ]	(348.27347, 9067.437)(348.18008, 438.91202)(329.16772, 10849.776)(330.1697, 670.44)(349.3031, 4394.8877)(350.19656, 2506.355)(331.1831, 9362.916)(332.1852, 922.8733)(350.2112, 1306.56)(372.31888, 54694.223)(373.84497, 8961.978)(354.41467, 28883.605)(355.91913, 615431.8)(356.1713, 387678.28)
Chrysartemin B/Artecanin	Sesquiterpene lactones	2474850	2601097	2487343	2552055	2620142	2634943		2974942	2970655	2438943	2588978	2679689	2639392		Chrysartemin B/Artecanin [ C15 H18 O5, tgt=59.37, overall=59.37 ]	(279.1158, 23141.7)(280.1189, 13463.233)(261.106, 66819.58)(262.10892, 5772.685)(281.13113, 7969.988)(282.13474, 1335.2084)(263.12067, 797.6549)
cynaropicrin	Sesquiterpene lactones	15548034	15434876	12159829	12046629	18688950	14178211		21926798	14771271	30469404	25315994	13918347	13465924		cynaropicrin [ C19 H22 O6, tgt=72.72, overall=72.72 ]	(373.13974, 149952.75)(374.14258, 16693.352)(333.1453, 766.86005)(347.1483, 3180.923)(369.1836, 153.43)(347.15222, 7426.9536)(355.13034, 226194.64)(356.1339, 40285.69)(349.1773, 23166.271)(350.1805, 2135.697)(351.1823, 740.4)
Microhelenin A	Sesquiterpene lactones	812789	756726	983110	1016447	563308	541785		1619750	1595476	6492910	6358180	497143	494158		Microhelenin A [ C15 H18 O4, tgt=94.31, overall=94.31 ]	(264.62653, 691.69995)(263.12778, 15684.95)(264.1316, 2970.9448)(247.12457, 4088.9453)(289.12115, 66635.98)(290.12405, 5166.688)(268.32346, 2421212.2)(269.10358, 391250.47)(270.10522, 46583.24)(271.1071, 2486.6184)
Microhelenin B	Sesquiterpene lactones	1324492	1359838	899563	1632846	1300510	1269012		1866209	1884720	538718	512948	1198616	1092739		Microhelenin B [ C20 H28 O5, tgt=71.81, overall=71.81 ]	(351.20483, 1672.85)(331.18265, 73420.96)(332.18546, 9597.23)(351.20718, 5359.893)(333.19873, 394378.6)(334.20093, 83439.07)(374.1929, 3773.1602)(356.84875, 34563.875)(358.18555, 4176.741)
Liatrin	Sesquiterpene lactones	13974177	14361261	5623877	5612783	4538972	4503028		4280462	6414280	5043907	5305735	4605136	4370960		Liatrin [ C22 H26 O8, tgt=68.51, overall=68.51 ]	(418.16705, 4189.327)(402.65805, 201932.9)(402.15533, 76513.766)(403.15607, 22216.121)(404.1579, 1106.655)(419.1692, 12643.76)(420.17184, 2049.335)(404.9437, 10577.656)(405.50037, 2783.0898)(436.1979, 181.76)(421.195, 244.15)(443.0377, 13894.9375)(442.55185, 2161.563)(443.14423, 3207.2578)(426.74063, 23357.748)(427.8593, 5353.2104)(427.48547, 40277.727)(428.15448, 9350.096)
8alpha-Propionyloxyanthemolide C	Sesquiterpene lactones	4129067	4940594	2907697	5796807	1456486	1468601		7234379	3839090	4847878	4805305	4182511	1408508		8alpha-Propionyloxyanthemolide C [ C20 H26 O8, tgt=84.55, overall=84.55 ]	(395.76556, 9896.084)(397.17432, 11424.42)(397.9278, 7520.69)(379.16528, 4104.83)(397.17584, 15597.314)(398.1791, 2605.24)(379.5795, 4383.7534)(412.19574, 160752.61)(413.1987, 31644.053)(414.2035, 2397.431)(394.18567, 82551.836)(396.1984, 1341.1699)(419.1594, 1680.94)(401.14743, 1884.0736)
Niveusin C	Sesquiterpene lactones	10928652	2383856	4382195	3649203	3137228	3011011		4488611	5119087	14784239	14300865	2469196	2336426		Niveusin C [ C20 H26 O7, tgt=62.92, overall=62.92 ]	(381.1811, 2564.015)(360.162, 3847.54)(363.1758, 1930.94)(396.2018, 575488.44)(397.20355, 82885.3)(398.2051, 6529.451)(404.76425, 34087.57)(402.1539, 18914.76)(403.1553, 2244.38)(387.15582, 108096.88)(388.1593, 15280.001)
Tetraneurin-A	Sesquiterpene lactones	10503505	10809947	2013618	2002017	19936498	17735252		1	1	4928295	4772589	1	1		Tetraneurin-A [ C17 H22 O6, tgt=53.48, overall=53.48 ]	(304.13434, 21858.678)(305.14755, 3504.47)(349.14047, 19981.402)(350.14304, 1364.7716)(330.20538, 122630.305)(331.20764, 11623.424)
damascenone	Sesquiterpene lactones	454365	441302	580825	583746	338257	340250		128532	1	279174	260163	350809	323110		damascenone [ C13 H18 O, tgt=70.53, overall=70.53 ]	(173.53108, 4957.3877)(176.14131, 16734.21)(177.14389, 1946.0874)(191.1402, 4866.93)(199.12698, 2395.7124)
9alpha-hydrox-11beta,13-dihydro-glucozaluzanin C	Sesquiterpene lactones	1627154	1640949	1436995	1440648	1311022	1272515		1676923	1684962	1649171	1679793	1307619	1273653		9alpha-hydrox-11beta,13-dihydro-glucozaluzanin C [ C15 H20 O4, tgt=60.82, overall=60.82 ]	(247.12675, 49186.812)(248.1299, 3945.8254)(267.15207, 631.1909)
crepidialanceoside A	Sesquiterpene lactones	2848184	2935007	1935101	1806088	1756982	1757003		518301	536510	1555453	1438548	1	1		crepidialanceoside A [ C29 H34 O11, tgt=40.53, overall=40.53 ]	(545.2111, 692.997)(559.2254, 2128.5151)(544.7119, 2128.7761)(542.2177, 1504.72)(583.2052, 15780.703)(584.208, 5866.31)(585.20605, 4210.285)(564.4221, 14040.5)(565.3009, 7936.867)(569.2073, 2392.73)
amarin	Sesquiterpene lactones	4258666	4018821	5108225	5356139	60552864	60099024		6746246	6763166	11318436	11453051	6065344	64313920		amarin [ C21 H26 O7, tgt=62.17, overall=62.17 ]	(390.16858, 2189.615)(393.1825, 143223.22)(394.18524, 23129.934)(377.172, 19658.434)(378.1735, 468.73)(393.2027, 18653.553)(394.2057, 2367.702)(395.2067, 123.58)(417.16412, 4899.2085)(418.16858, 761.14)(399.1566, 157023.72)(400.1592, 20631.941)
picridin	Sesquiterpene lactones	812789	756726	983110	1016447	563308	541785		1619750	1595476	6492910	6358180	497143	494158		picridin [ C15 H18 O4, tgt=94.31, overall=94.31 ]	(264.62653, 691.69995)(263.12778, 15684.95)(264.1316, 2970.9448)(247.12457, 4088.9453)(289.12115, 66635.98)(290.12405, 5166.688)(268.32346, 2421212.2)(269.10358, 391250.47)(270.10522, 46583.24)(271.1071, 2486.6184)
dihydroamarin	Sesquiterpene lactones	1342241	2173225	6432474	2158655	2155908	2342500		4591971	20757084	25269220	3256275	2629421	2730128		dihydroamarin [ C21 H28 O7, tgt=84.67, overall=84.67 ]	(393.07758, 164383.94)(394.1853, 28933.38)(395.1945, 54960.312)(397.2014, 3211.69)(395.19812, 606012.8)(396.20132, 131078.23)(397.20328, 19609.049)(398.20505, 2923.1987)(375.18344, 107952.66)(376.18506, 7492.6997)(414.22516, 2747.605)(419.18234, 89156.62)(420.18518, 11097.295)(401.1712, 74887.84)(402.17407, 9054.14)
repdiolide	Sesquiterpene lactones	647694	2299933	3820460	3802797	1129507	2501051		1543331	1526365	4333117	4099896	2551971	2507029		repdiolide [ C19 H22 O4, tgt=62.63, overall=62.63 ]	(314.15466, 3114.4934)(298.14462, 1272.2767)(314.1758, 11919.864)(315.17944, 2246.436)(319.96622, 48433.75)(320.13406, 4838.0093)(321.1344, 546.425)
Graminiliatrin	Sesquiterpene lactones	6066646	1	5721257	5703977	6373394	6147552		1498575	859455	32449458	685707	6169894	5939951		Graminiliatrin [ C22 H26 O9, tgt=57.00, overall=57.00 ]	(436.66733, 4071.6213)(436.1592, 390.05)(419.35733, 4611.554)(420.1631, 1486.16)(437.17047, 4748.731)(438.1733, 645.18835)(439.1819, 9612.205)(418.93823, 21520.178)(420.4444, 5526.859)(422.16272, 1656.0599)(453.2008, 15652.37)(454.204, 812.96)(457.43423, 10428.966)(458.81436, 2387.2698)(459.15503, 320.46)(441.67337, 17479.752)(441.81372, 3706.1433)(443.14612, 4011.7415)
11,13beta-dihydro-15-hydroxyhypocretenolide	Sesquiterpene lactones	812789	756726	983110	1016447	563308	541785		1619750	1595476	6492910	6358180	497143	494158		11,13beta-dihydro-15-hydroxyhypocretenolide [ C15 H18 O4, tgt=94.31, overall=94.31 ]	(264.62653, 691.69995)(263.12778, 15684.95)(264.1316, 2970.9448)(247.12457, 4088.9453)(289.12115, 66635.98)(290.12405, 5166.688)(268.32346, 2421212.2)(269.10358, 391250.47)(270.10522, 46583.24)(271.1071, 2486.6184)
Xantholide-B	Sesquiterpene lactones	3941069	360681	1396210	1374523	1314454	1231967		1124654	1121931	208779	690404	716963	724902		Xantholide-B [ C15 H20 O2, tgt=75.31, overall=75.31 ]	(233.14824, 40027.598)(234.14937, 8471.506)(235.1523, 764.06)(214.6363, 37319.406)(215.13994, 1859.1466)(218.1533, 1363.7)(255.13629, 227.38501)(241.13724, 2347.7244)
Hiyodorilactone?B	Sesquiterpene lactones	41648296	42970856	6103092	6369809	47587944	47269204		10175402	10321129	14406939	14350165	47704300	47094016		Hiyodorilactone?B [ C22 H28 O7, tgt=65.77, overall=65.77 ]	(390.93634, 2195.4207)(425.2242, 202297.44)(426.22653, 30333.592)(424.2215, 8545.41)(408.21524, 322.88)(431.18036, 86559.26)(432.18512, 30386.059)(413.172, 166883.31)(414.1744, 23521.03)
Hiyodorilactone?D	Sesquiterpene lactones	18740056	18558220	31810936	4973575	25921776	3484765		4974747	4871877	5319012	6254609	26179346	3473389		Hiyodorilactone?D [ C22 H28 O8, tgt=43.87, overall=43.87 ]	(420.17682, 6616.9526)(421.17334, 1484.5782)(402.1726, 4082.9302)(404.84644, 1770.23)(446.7129, 8912.637)(448.17722, 1305.7001)(427.99673, 174304.97)(428.99905, 24505.08)
montanone	Sesquiterpene lactones	9099190	11520190	17922464	17473924	16112992	16085580		10131914	9967195	20574460	20142830	15789389	15725150		montanone [ C18 H17 O6, tgt=60.06, overall=60.06 ]	(333.10965, 2189.5151)(315.10007, 58523.25)(316.10272, 6498.695)(331.113, 1393.91)(317.11237, 38083.445)(349.1406, 13040.152)(350.14328, 568.63995)(331.131, 99127.75)(332.13336, 9982.706)(333.13882, 1020.5428)(334.14334, 673.6)(357.06296, 8505.387)(357.1093, 2728.44)(338.6349, 42935.977)(335.0821, 1970.11)
(1R,6S,7R,8S,l0S)-8,15-Dihydroxy-l(10)-epoxy-germacr-4-ene-6,12-olide	Sesquiterpene lactones	278033	253000	507513	423101	255049	247417		1257298	1242682	5059106	4943867	243828	302304		(1R,6S,7R,8S,l0S)-8,15-Dihydroxy-l(10)-epoxy-germacr-4-ene-6,12-olide [ C15 H20 O5, tgt=68.94, overall=68.94 ]	(280.73242, 5089.9614)(263.12155, 56577.582)(264.12448, 4865.048)(283.1456, 236.28)(263.12778, 19793.23)(264.1316, 3768.29)(289.1212, 107936.484)(290.12436, 11072.636)
4,13,11,15-tetraidroredentina	Sesquiterpene lactones	100623	88901	291923	85193	795536	847511		350701	460812	363859	362078	847289	823371		4,13,11,15-tetraidroredentina [ C15 H24 O4, tgt=54.92, overall=54.92 ]	(270.31415, 13799.759)(270.1711, 466.7622)(251.82697, 18214.156)(252.16093, 905.98676)(271.18396, 112885.56)(272.18668, 11190.846)(291.1557, 1226.942)
8-Epi-Xanthatin	Sesquiterpene lactones	1627154	1640949	197975	201745	215160	216003		1676923	1684962	1649171	1679793	213048	201372		8-Epi-Xanthatin [ C15 H18 O3, tgt=60.82, overall=60.82 ]	(247.12677, 51519.13)(248.12996, 4187.466)(229.11864, 15763.56)(230.12354, 1271.705)(249.14148, 4197.325)(251.14403, 4489.4463)(266.1686, 2539.74)
Laserolide	Sesquiterpene lactones	2790830	2763292	6378205	6414968	3523084	3478919		35759300	35832476	61787976	61064784	1	3237234		Laserolide [ C22 H30 O6, tgt=64.02, overall=64.02 ]	(392.22006, 1632.2383)(393.23825, 784.3957)(415.28827, 18277.064)(416.29153, 2930.6274)(399.19217, 52261.31)(400.19516, 7347.3823)
3,4beta-dihydro-15-dehydrolactucopicrin	Sesquiterpene lactones	460312	512493	999814	788867	414930	726188		373467	5081312	9382240	9954423	423475	728899		3,4beta-dihydro-15-dehydrolactucopicrin [ C23 H22 O7, tgt=59.46, overall=59.46 ]	(436.69006, 17563.586)(437.63513, 6004.085)(397.14026, 160610.75)(398.14398, 42922.76)(415.14844, 35272.234)(431.18057, 34675.402)(432.18362, 4531.1694)(413.9493, 29079.13)(412.9498, 7463.59)(413.1519, 1467.2867)(417.12238, 15028.612)(418.12592, 1909.2019)(419.1244, 495.85)(412.9693, 65714.66)(413.72604, 20746.807)(413.1709, 114380.33)(414.17365, 15482.649)
Crepidiaside A	Sesquiterpene lactones	619531	638439	991360	1125661	1817948	1708670		1700854	1115712	2457401	3152854	1706290	1661526		Crepidiaside A [ C21 H26 O9, tgt=77.22, overall=77.22 ]	(423.28897, 5338.3853)(426.17062, 801.1501)(404.61267, 4691.7646)(405.14258, 1811.5901)(406.1326, 276.115)(425.17114, 266990.03)(426.1738, 53041.37)(427.9316, 23006.758)(406.32666, 8211.719)(440.64795, 3524.5037)(446.14825, 5286.7856)(447.6525, 1229.7267)(449.1604, 214.58)(431.14606, 1974.7772)
Crepidiaside B	Sesquiterpene lactones	1877847	1	5283522	5047406	3362182	3761130		8947982	9143697	9461109	11016090	3395591	3734832		Crepidiaside B [ C21 H28 O9, tgt=73.20, overall=73.20 ]	(425.57343, 144254.6)(426.64908, 30377.496)(427.4354, 66297.125)(428.18753, 12583.009)(406.41605, 12144.53)(407.17157, 2357.1348)(427.1872, 323327.34)(428.19028, 54081.32)(429.19717, 22321.148)(430.19763, 987.87)(408.98587, 222091.42)(410.1798, 45312.8)(442.20453, 4211.25)(425.20444, 996.59393)(447.1622, 3498.348)(433.15945, 918.95996)
Crepidiaside C	Sesquiterpene lactones	3196328	3234412	6118424	6072121	6410947	6439593		9440571	5101477	8977225	8625100	3647935	3447884		Crepidiaside C [ C21 H30 O9, tgt=91.22, overall=91.22 ]	(427.5873, 28740.45)(428.59454, 22555.29)(429.60263, 15265.317)(430.20444, 2104.9968)(408.5477, 61219.875)(410.05435, 20066.148)(411.19196, 53941.46)(412.19458, 8186.0234)(429.20084, 29714.861)(430.20422, 3973.1687)(431.21173, 2085.974)(411.19244, 638108.2)(412.19568, 127365.59)(413.1963, 31749.025)(414.1984, 2449.4978)(449.1787, 1205.645)(433.3729, 4176.414)(435.1742, 276.09)
glucozaluzanin C	Sesquiterpene lactones	3543083	3695290	6495258	6708791	3940172	3971223		7587807	7962939	12192337	11574779	4122385	3856417		glucozaluzanin C [ C21 H28 O8, tgt=91.22, overall=91.22 ]	(408.68002, 86010.195)(410.18002, 25802.666)(411.19217, 132304.34)(412.1948, 12094.84)(411.19287, 793131.5)(412.19608, 149314.9)(413.3634, 26964.592)(414.1985, 2175.644)(431.1666, 1256.422)(432.1828, 148.8)(417.16415, 10068.996)(418.16855, 913.00336)
Eupacunin	Sesquiterpene lactones	41648296	42970856	6103092	6369809	47587944	47269204		10175402	10321129	14406939	14350165	47704300	47094016		Eupacunin [ C22 H28 O7, tgt=65.77, overall=65.77 ]	(390.93634, 2195.4207)(425.2242, 202297.44)(426.22653, 30333.592)(424.2215, 8545.41)(408.21524, 322.88)(431.18036, 86559.26)(432.18512, 30386.059)(413.172, 166883.31)(414.1744, 23521.03)
8alpha-O-(4-acetoxy-3-hydroxy-2-methylenebutanoyloxy)-4-epi-sonchucarpolide	Sesquiterpene lactones	9602260	9832941	14221973	13887864	16751036	16589806		3571919	3586272	15427614	15180497	16490047	16036795		8alpha-O-(4-acetoxy-3-hydroxy-2-methylenebutanoyloxy)-4-epi-sonchucarpolide [ C22 H28 O9, tgt=83.06, overall=83.06 ]	(438.85037, 12347.763)(439.51733, 378.85)(439.1839, 11052.89)(418.71228, 9990.881)(420.17236, 4658.4517)(421.16827, 1912.074)(438.68625, 303649.97)(439.61792, 81608.71)(439.1927, 36273.43)(440.19464, 2392.7852)(420.17285, 9290.923)(420.17178, 3859.3835)(421.1677, 1088.9434)(455.21515, 5600.459)(460.25076, 226524.02)(460.159, 64082.64)(461.16153, 13064.423)(462.1632, 857.86)(441.43448, 34300.2)(44…
Eupalinin-A	Sesquiterpene lactones	18740056	18558220	31810936	1	25921776	1		4974747	4871877	5319012	6254609	26179346	1		Eupalinin-A [ C22 H28 O8, tgt=43.87, overall=43.87 ]	(420.17627, 7083.2075)(421.17334, 1484.5782)(402.1733, 11896.13)(403.1806, 4070.11)(446.7129, 8912.637)(448.17722, 1305.7001)(428.4027, 178388.11)(429.40512, 25086.709)
Stenophyllolide	Sesquiterpene lactones	1627154	1640949	1436995	1440648	1311022	1272515		1676923	1684962	1649171	1679793	1307619	1273653		Stenophyllolide [ C15 H20 O4, tgt=60.82, overall=60.82 ]	(247.12675, 49186.812)(248.1299, 3945.8254)(267.15207, 631.1909)
(6R,7R,8S,3R) 8alpha-(3,4-dihydroxy-2-methylene-butanoyloxy)-15-oxo-helianga 1(10), 4(5), 11(13) trien-6-olide	Sesquiterpene lactones	2624281	2601581	6045368	6003878	3415806	3393568		34646528	34834920	59605320	58986880	3243653	3133933		(6R,7R,8S,3R) 8alpha-(3,4-dihydroxy-2-methylene-butanoyloxy)-15-oxo-helianga 1(10), 4(5), 11(13) trien-6-olide [ C20 H25 O7, tgt=91.52, overall=91.52 ]	(381.1811, 2570.15)(395.1985, 1940183.6)(396.20163, 391836.0)(397.20316, 55545.38)(398.20526, 6546.083)(401.15094, 324051.53)(402.1543, 73945.04)(403.15588, 8471.378)(404.1581, 387.98)(387.15405, 1030.525)
grosshemin	Sesquiterpene lactones	812789	756726	983110	1016447	563308	541785		1619750	1595476	6492910	6358180	497143	494158		grosshemin [ C15 H18 O4, tgt=94.31, overall=94.31 ]	(264.62653, 691.69995)(263.12778, 15684.95)(264.1316, 2970.9448)(247.12457, 4088.9453)(289.12115, 66635.98)(290.12405, 5166.688)(268.32346, 2421212.2)(269.10358, 391250.47)(270.10522, 46583.24)(271.1071, 2486.6184)
scorzonerin	Sesquiterpene lactones	3013348	3105055	3917411	4162800	4811788	5258760		3824815	3840182	680216	624613	4476246	4341867		scorzonerin [ C30 H36 O11, tgt=91.90, overall=91.90 ]	(573.2408, 1736.4775)(593.26764, 574720.4)(594.27094, 214509.81)(595.27295, 33176.95)(596.27466, 2882.8552)(575.254, 270.57)(595.21606, 5591.9126)
Paucin	Sesquiterpene lactones	433919	273460	263214	190974	340525	393651		943230	475970	609086	513694	329009	200228		Paucin [ C23 H32 O10, tgt=63.08, overall=63.08 ]	(469.01007, 14375.445)(470.60623, 6306.68)(471.20807, 11495.566)(472.21414, 1429.3534)(451.18893, 12202.168)(452.44202, 1736.94)(453.20175, 22387.217)(454.20486, 2670.41)(471.2103, 12198.099)(472.214, 1479.1799)(453.20105, 7057.4546)(454.87402, 11272.564)(454.87497, 1986.23)(487.11328, 985.5775)(493.1885, 462.0)(474.61304, 3389.4988)(475.47263, 4452.4985)(476.18884, 575.87665)(479.1871, 2529.19)
Stramonin-B	Sesquiterpene lactones	812789	756726	983110	1016447	563308	541785		1619750	1595476	6492910	6358180	497143	494158		Stramonin-B [ C15 H18 O4, tgt=94.31, overall=94.31 ]	(264.62653, 691.69995)(263.12778, 15684.95)(264.1316, 2970.9448)(247.12457, 4088.9453)(289.12115, 66635.98)(290.12405, 5166.688)(268.32346, 2421212.2)(269.10358, 391250.47)(270.10522, 46583.24)(271.1071, 2486.6184)
Crepiside?E	Sesquiterpene lactones	1877847	1	5283522	5047406	3362182	3761130		8947982	9143697	9461109	11016090	3395591	3734832		Crepiside?E [ C21 H28 O9, tgt=73.20, overall=73.20 ]	(425.57343, 144254.6)(426.64908, 30377.496)(427.4354, 66297.125)(428.18753, 12583.009)(406.41605, 12144.53)(407.17157, 2357.1348)(427.1872, 323327.34)(428.19028, 54081.32)(429.19717, 22321.148)(430.19763, 987.87)(408.98587, 222091.42)(410.1798, 45312.8)(442.20453, 4211.25)(425.20444, 996.59393)(447.1622, 3498.348)(433.15945, 918.95996)
11,13beta-dihydro-14-hydroxyhypocretenolide-beta-D-glucopyranoside	Sesquiterpene lactones	1877847	1	5283522	5047406	3362182	3761130		8947982	9143697	9461109	11016090	3395591	3734832		11,13beta-dihydro-14-hydroxyhypocretenolide-beta-D-glucopyranoside [ C21 H28 O9, tgt=73.20, overall=73.20 ]	(425.57343, 144254.6)(426.64908, 30377.496)(427.4354, 66297.125)(428.18753, 12583.009)(406.41605, 12144.53)(407.17157, 2357.1348)(427.1872, 323327.34)(428.19028, 54081.32)(429.19717, 22321.148)(430.19763, 987.87)(408.98587, 222091.42)(410.1798, 45312.8)(442.20453, 4211.25)(425.20444, 996.59393)(447.1622, 3498.348)(433.15945, 918.95996)
gallocatechina/epigallocatechina	Sesquiterpene lactones	386181	955646	1720668	1770151	1213886	1544217		1420913	1406193	476205	598662	1214980	1266056		gallocatechina/epigallocatechina [ C15 H14 O7, tgt=49.98, overall=49.98 ]	(306.6015, 124083.34)(308.07755, 27411.93)(309.0782, 6077.5273)(292.07462, 3293.843)(291.0699, 6102.72)(308.5869, 4707.7603)(291.0782, 21787.13)(292.0825, 1690.1067)(293.07742, 1255.9271)(324.77444, 30634.004)(325.51624, 8028.382)(328.1208, 1672.63)(307.0974, 432.035)(331.0717, 935.51)(316.0647, 293.825)
acidosinapico	Sesquiterpene lactones	1679836	183823	186146	194400	1796626	1753973		1	1	121502	659778	1759648	1708208		acidosinapico [ C11 H12 O5, tgt=47.49, overall=47.49 ]	(225.6549, 3311.7893)(227.0758, 4405.775)(228.0786, 451.14)(208.88457, 1579.63)(211.06879, 581.9075)(227.67055, 2769.4587)(229.08636, 134.45667)(210.071, 1313.0575)(244.1064, 293.8425)(225.38167, 1472.4885)(248.56102, 1354.1)(251.06573, 15442.997)(252.06844, 433.24)(233.05862, 2770.7466)(234.0572, 283.4414)
Montanolide	Sesquiterpene lactones	6153148	6431059	1346173	19238152	4994880	4841449		8462230	12493550	71229032	6181386	4841367	4750449		Montanolide [ C22 H30 O7, tgt=55.88, overall=55.88 ]	(406.19983, 4420.723)(407.2023, 670.588)(393.2024, 3488.2698)(428.2413, 2294.685)(429.244, 323.31)(432.50488, 23701.785)(433.94955, 34105.547)(434.2006, 17173.367)(415.18683, 61924.55)(416.18988, 9892.892)
8alpha-Isobutyryloxyanthemolide C	Sesquiterpene lactones	3543083	3695290	6495258	6708791	3940172	3971223		7587807	7962939	12192337	11574779	4122385	3856417		8alpha-Isobutyryloxyanthemolide C [ C21 H28 O8, tgt=91.22, overall=91.22 ]	(408.68002, 86010.195)(410.18002, 25802.666)(411.19217, 132304.34)(412.1948, 12094.84)(411.19287, 793131.5)(412.19608, 149314.9)(413.3634, 26964.592)(414.1985, 2175.644)(431.1666, 1256.422)(432.1828, 148.8)(417.16415, 10068.996)(418.16855, 913.00336)
8alpha-Isobutyryloxyanthemolide A	Sesquiterpene lactones	3543083	3695290	6495258	6708791	3940172	3971223		7587807	7962939	12192337	11574779	4122385	3856417		8alpha-Isobutyryloxyanthemolide A [ C21 H28 O8, tgt=91.22, overall=91.22 ]	(408.68002, 86010.195)(410.18002, 25802.666)(411.19217, 132304.34)(412.1948, 12094.84)(411.19287, 793131.5)(412.19608, 149314.9)(413.3634, 26964.592)(414.1985, 2175.644)(431.1666, 1256.422)(432.1828, 148.8)(417.16415, 10068.996)(418.16855, 913.00336)
11beta,13-dihydro-taraxinic acid-1'-O-beta-D-glucopyranoside	Sesquiterpene lactones	949482	24858644	2912171	35623608	21962924	21800160		44073896	43549780	19476242	17637072	21398274	21034322		11beta,13-dihydro-taraxinic acid-1'-O-beta-D-glucopyranoside [ C21 H32 O9, tgt=60.51, overall=60.51 ]	(429.98508, 23636.037)(430.20468, 4700.792)(431.21432, 1458.6699)(411.19278, 830105.7)(412.1959, 152371.4)(413.41592, 34399.434)(414.20584, 5011.8115)(431.2167, 1429.21)(413.20667, 61993.41)(414.21, 8557.818)(415.2138, 1199.49)(430.23553, 4463.8823)(431.23682, 1151.61)(453.20053, 6780.181)(454.20386, 1432.405)(433.47318, 3540.404)
9-O-Acetylanthemolide B	Sesquiterpene lactones	6264584	6718601	11557678	11750436	9403873	9315048		7541040	7564356	17342460	17188528	7501060	9148208		9-O-Acetylanthemolide B [ C17 H22 O8, tgt=64.49, overall=64.49 ]	(355.13104, 446861.75)(356.13394, 59528.664)(339.13306, 707.675)(357.1466, 701659.0)(358.1495, 98138.19)(339.13464, 11690.928)(340.13748, 1162.8351)(372.1637, 16079.522)(355.16266, 4874.72)(360.49542, 2585.3008)
Epi-Tulipinolide?Diepoxide	Sesquiterpene lactones	10503505	10809947	2013618	2002017	19936498	17735252		2263210	2318158	4928295	4772589	2664789	2088899		Epi-Tulipinolide?Diepoxide [ C17 H22 O6, tgt=53.48, overall=53.48 ]	(304.13434, 21858.678)(305.14755, 3504.47)(348.50748, 17504.988)(349.04944, 1025.7727)(330.55817, 127562.14)(331.56033, 12068.23)
Resveratrolo	Sesquiterpene lactones	571680	550028	290400	279425	315130	301194		342026	285123	1025541	868012	328453	282662		Resveratrolo [ C14 H12 O3, tgt=31.97, overall=31.97 ]	(228.07925, 5728.2935)(210.29234, 1498.1855)(229.0867, 251.0)(215.0857, 1228.86)(250.1256, 1308.47)(232.1151, 957.3433)(253.29335, 14963.078)(252.06844, 848.495)(233.56012, 5657.075)(234.05707, 409.56665)
Alantolactone	Sesquiterpene lactones	3941069	360681	1396210	1374523	1314454	1231967		1124654	1121931	208779	690404	716963	724902		Alantolactone [ C15 H20 O2, tgt=75.31, overall=75.31 ]	(233.14824, 40027.598)(234.14937, 8471.506)(235.1523, 764.06)(214.6363, 37319.406)(215.13994, 1859.1466)(218.1533, 1363.7)(255.13629, 227.38501)(241.13724, 2347.7244)
Xantholide	Sesquiterpene lactones	3941069	360681	1396210	1374523	1314454	1231967		1124654	1121931	208779	690404	716963	724902		Xantholide [ C15 H20 O2, tgt=75.31, overall=75.31 ]	(233.14824, 40027.598)(234.14937, 8471.506)(235.1523, 764.06)(214.6363, 37319.406)(215.13994, 1859.1466)(218.1533, 1363.7)(255.13629, 227.38501)(241.13724, 2347.7244)
Plenolin	Sesquiterpene lactones	1627154	1640949	1436995	1440648	1311022	1272515		1676923	1684962	1649171	1679793	1307619	1273653		Plenolin [ C15 H20 O4, tgt=60.82, overall=60.82 ]	(247.12675, 49186.812)(248.1299, 3945.8254)(267.15207, 631.1909)
lactucine	Sesquiterpene lactones	699805	746721	1210735	1307430	1651051	1667620		1794360	1747188	3783878	3668841	1761863	1731547		lactucine [ C15 H16 O5, tgt=69.73, overall=69.73 ]	(277.10028, 41918.703)(278.1033, 3836.2422)(278.0688, 10172.807)(278.10278, 1705.9099)(295.1354, 1478.922)(280.1336, 1607.2183)(303.10004, 65538.96)(304.10297, 5640.057)(282.0826, 471.35)
Linifolin-A	Sesquiterpene lactones	448995	434627	71225360	604911	684590	680560		420710	427897	2323774	17553156	665741	631896		Linifolin-A [ C17 H20 O5, tgt=53.53, overall=53.53 ]	(304.13425, 22361.594)(305.1459, 4325.72)(287.13126, 2083.644)(307.16333, 3955.3823)(330.08603, 36999.74)(330.73975, 4718.075)(312.61887, 867.73376)
Eupatocunoxin	Sesquiterpene lactones	18740056	18558220	31810936	4973575	25921776	3484765		4974747	4871877	5319012	6254609	26179346	3473389		Eupatocunoxin [ C22 H28 O8, tgt=43.87, overall=43.87 ]	(420.17682, 6616.9526)(421.17334, 1484.5782)(402.1726, 4082.9302)(404.84644, 1770.23)(446.7129, 8912.637)(448.17722, 1305.7001)(427.99673, 174304.97)(428.99905, 24505.08)
Hymenoxon	Sesquiterpene lactones	1691118	1983424	1	161483	2235659	2212869		134257	655172	165308	892771	2084469	2013534		Hymenoxon [ C15 H22 O5, tgt=65.40, overall=65.40 ]	(282.91583, 51422.125)(283.87668, 5757.467)(265.13693, 14340.443)(266.13968, 1298.25)(285.1638, 409.1)(306.68115, 2574.0586)
Vernoflexuoside	Sesquiterpene lactones	3543083	3695290	6495258	6708791	3940172	3971223		7587807	7962939	12192337	11574779	4122385	3856417		Vernoflexuoside [ C21 H28 O8, tgt=91.22, overall=91.22 ]	(408.68002, 86010.195)(410.18002, 25802.666)(411.19217, 132304.34)(412.1948, 12094.84)(411.19287, 793131.5)(412.19608, 149314.9)(413.3634, 26964.592)(414.1985, 2175.644)(431.1666, 1256.422)(432.1828, 148.8)(417.16415, 10068.996)(418.16855, 913.00336)
desacylcynaropicrin	Sesquiterpene lactones	812789	756726	983110	1016447	563308	541785		1619750	1595476	6492910	6358180	497143	494158		desacylcynaropicrin [ C15 H18 O4, tgt=94.31, overall=94.31 ]	(264.62653, 691.69995)(263.12778, 15684.95)(264.1316, 2970.9448)(247.12457, 4088.9453)(289.12115, 66635.98)(290.12405, 5166.688)(268.32346, 2421212.2)(269.10358, 391250.47)(270.10522, 46583.24)(271.1071, 2486.6184)
Zuccarinin	Sesquiterpene lactones	329801	344958	916554	692196	827571	830171		653285	683721	4794240	2856772	777726	752270		Zuccarinin [ C22 H26 O10, tgt=54.66, overall=54.66 ]	(451.48593, 19043.682)(452.91183, 7793.6797)(453.4995, 43487.34)(454.1595, 30225.07)(455.159, 15104.21)(433.1423, 13855.6)(434.1445, 1064.61)(435.15088, 3452.055)(453.16537, 8115.496)(454.16858, 950.51)(469.1946, 4214.757)(450.1741, 10098.496)(475.48346, 8192.201)(476.86838, 1467.24)(477.14966, 542.98)(457.13242, 2256.9858)
hieracin II	Sesquiterpene lactones	865917	1363013	465009	1090180	1	870976		1	1	495105	1	795165	793582		hieracin II [ C16 H25 O6, tgt=60.43, overall=60.43 ]	(297.161, 756.47)(314.1744, 2374.91)(332.4692, 15613.925)(334.05692, 1027.0485)(314.19476, 2766.5981)(337.15628, 11474.32)(338.1592, 529.2633)
Polhovolide	Sesquiterpene lactones	652827	680790	752598	737047	541436	759975		559554	467036	3200614	870547	791085	498924		Polhovolide [ C23 H32 O8, tgt=52.29, overall=52.29 ]	(436.58594, 1746.6287)(439.4373, 31878.652)(440.3385, 7036.522)(442.2302, 118.54)(421.21542, 695.9267)(440.23962, 1031.305)(463.20642, 105.685)(465.2215, 219.69)(445.19675, 30700.004)(446.19916, 4012.0168)(447.20737, 751.1029)
NEW guaianolide	Sesquiterpene lactones	493451	494695	866483	850248	1298055	620814		1720089	1713996	3915244	3766432	1137890	1258516		NEW guaianolide [ C20 H26 O6, tgt=68.33, overall=68.33 ]	(363.17447, 543.252)(347.63358, 4355.796)(345.1662, 2480.59)(348.17624, 15592.828)(350.18042, 2144.82)(384.21616, 1664.965)(385.2171, 332.608)(366.20566, 649.4175)(389.17062, 15008.605)(390.1746, 2836.4814)(371.16165, 324070.34)(372.16464, 46325.52)
babylin B	Sesquiterpene lactones	847346	902951	1658751	1773700	1340470	2727971		1022825	1061697	1871216	3777810	1336144	1265056		babylin B [ C19 H24 O8, tgt=60.12, overall=60.12 ]	(381.2469, 195312.52)(382.25516, 26962.092)(383.15952, 19640.266)(363.13492, 1223.4299)(383.1604, 17137.877)(384.16367, 941.32837)(365.15085, 12567.077)(366.1539, 1121.89)(398.2801, 3859.5981)(399.18448, 673.28)(380.57336, 4375.85)(405.13635, 2300.6516)(406.1396, 524.18)(388.63815, 1763.9225)
babylin A	Sesquiterpene lactones	847346	902951	1658751	1773700	1340470	2727971		1022825	1061697	1871216	3777810	1336144	1265056		babylin A [ C19 H24 O8, tgt=60.12, overall=60.12 ]	(381.2469, 195312.52)(382.25516, 26962.092)(383.15952, 19640.266)(363.13492, 1223.4299)(383.1604, 17137.877)(384.16367, 941.32837)(365.15085, 12567.077)(366.1539, 1121.89)(398.2801, 3859.5981)(399.18448, 673.28)(380.57336, 4375.85)(405.13635, 2300.6516)(406.1396, 524.18)(388.63815, 1763.9225)
15-Deschloro-15-hydroxy-8-desacylcentaurepensin-8-O-(4-hydroxy)tiglinat	Sesquiterpene lactones	2681860	2590552	3036450	2964039	2814621	2726413		546343	512750	2855548	1508695	2745747	2651471		15-Deschloro-15-hydroxy-8-desacylcentaurepensin-8-O-(4-hydroxy)tiglinat [ C26 H30 O10, tgt=73.76, overall=73.76 ]	(502.78964, 1699.574)(505.19812, 1644.89)(506.1998, 288.91498)(485.8468, 286.32166)(503.47827, 1888.5658)(506.1993, 583.05)(488.3535, 3801.63)(488.1889, 1191.75)(522.225, 2199.455)(521.2071, 843.82)(504.06094, 34518.887)(504.6733, 8782.443)(505.21158, 1641.5437)(531.193, 169.45)(512.0662, 4129.079)(512.17316, 1407.1875)(513.18475, 3552.5725)
lactucopicrin	Sesquiterpene lactones	460312	512493	999814	788867	414930	726188		373467	5081312	9382240	9954423	423475	728899		lactucopicrin [ C23 H22 O7, tgt=59.46, overall=59.46 ]	(436.69006, 17563.586)(437.63513, 6004.085)(397.14026, 160610.75)(398.14398, 42922.76)(415.14844, 35272.234)(431.18057, 34675.402)(432.18362, 4531.1694)(413.9493, 29079.13)(412.9498, 7463.59)(413.1519, 1467.2867)(417.12238, 15028.612)(418.12592, 1909.2019)(419.1244, 495.85)(412.9693, 65714.66)(413.72604, 20746.807)(413.1709, 114380.33)(414.17365, 15482.649)
Chlorochrymorin	Sesquiterpene lactones	5802162	3411558	5801544	4115295	5867466	5689792		3816808	3648038	6839974	6806765	5547117	5589297		Chlorochrymorin [ C15 H19 Cl O5, tgt=62.18, overall=62.18 ]	(316.84192, 43352.062)(321.0974, 160.22)(301.0841, 1380.255)(315.09964, 70650.625)(316.1007, 6163.714)(317.0965, 3800.391)(300.87872, 47409.344)(302.34674, 2567.7776)(334.52582, 42763.855)(336.12872, 5960.677)(337.13046, 2506.6233)(316.50677, 77208.9)(318.11874, 15014.676)(338.74817, 13923.507)(339.7053, 6113.46)(342.33975, 6858.162)(343.09314, 381.93)(319.57162, 2582.739)
8,9-Di-O-acetylanthemolide B	Sesquiterpene lactones	1353491	1311921	2810820	2809112	2391080	2391235		3608209	390004	6162206	6007050	2415803	2297570		8,9-Di-O-acetylanthemolide B [ C19 H24 O9, tgt=70.30, overall=70.30 ]	(398.25958, 16130.634)(401.15646, 6333.58)(380.81906, 60284.535)(380.53485, 19975.113)(399.15588, 152822.62)(400.1585, 19120.398)(401.1654, 57749.027)(402.1678, 13905.18)(381.36972, 320867.9)(382.14944, 52655.027)(414.2365, 12327.189)(416.1832, 21957.96)(396.16418, 2403.2366)(404.12817, 826.2)(406.1352, 576.92004)
2alpha-Hydroxy-15-methacrylate-germacra-1(10)E,4E,7(11)-trien-12,6alpha-olide	Sesquiterpene lactones	22238154	22475228	5303462	4971282	47347180	4982303		753080	728955	9646691	9997163	4805715	4908279		2alpha-Hydroxy-15-methacrylate-germacra-1(10)E,4E,7(11)-trien-12,6alpha-olide [ C19 H24 O5, tgt=55.98, overall=55.98 ]	(334.67166, 4210.5703)(318.15945, 1629.5566)(334.17233, 8832.582)(335.17554, 1080.96)(359.15988, 3403.303)(360.1688, 408.52002)(341.15103, 31360.355)(342.15247, 6823.9927)
Molephantinin	Sesquiterpene lactones	1011949	855914	1862470	1952552	1207690	1194215		2033892	1534781	2654849	2606973	1208505	920631		Molephantinin [ C20 H24 O6, tgt=60.18, overall=60.18 ]	(360.16086, 1796.3539)(347.1603, 3747.377)(345.66217, 5990.43)(348.1645, 1104.49)(378.1862, 146.1)(387.10553, 100240.61)(388.09973, 13935.4795)(369.14526, 55684.457)(370.14957, 12205.457)
zaluzanin C	Sesquiterpene lactones	1627154	1640949	1	1	1	1		1676923	1684962	1649171	1679793	1	1		zaluzanin C [ C15 H18 O3, tgt=60.82, overall=60.82 ]	(247.12679, 51536.113)(248.12999, 4136.6562)(266.1686, 2539.74)
methyl 14-O-acetylathoin12-oate	Sesquiterpene lactones	6872802	7052332	3721977	3887246	892927	871333		900974	4149006	4208079	4112888	815827	3816245		methyl 14-O-acetylathoin12-oate [ C22 H30 O9, tgt=75.33, overall=75.33 ]	(438.37735, 251680.44)(439.4429, 33308.047)(440.44604, 3940.0815)(421.17538, 2310.78)(423.19113, 1475.6133)(441.20163, 20389.107)(442.20493, 1637.415)(443.2137, 3250.25)(456.59906, 1265.8527)(440.55356, 4817.44)(463.1791, 334.53)(445.41888, 71961.625)(447.17383, 24634.148)(448.17575, 2232.2651)
acidorosmarinico	Sesquiterpene lactones	295665	337908	563213	542147	485082	439554		1121304	1093747	2331341	2278182	435690	491931		acidorosmarinico [ C18 H16 O8, tgt=58.03, overall=58.03 ]	(362.75793, 7299.277)(363.75922, 4064.4111)(365.1022, 4033.76)(343.073, 12612.33)(364.49817, 323673.84)(365.9023, 147047.86)(366.10312, 59970.203)(344.55737, 22682.803)(346.09207, 4043.9)(347.08975, 1124.9615)(360.108, 3618.2148)(383.773, 67291.52)(384.07614, 7922.2295)(385.0786, 781.7545)(369.07266, 314.02502)
8alpha-O-(4-Hydroxy-2-methylenebutanoyloxy)-11beta,13-dihydro-4-epi-sonchucarpolide	Sesquiterpene lactones	307461	1	1	1	3517609	1		1320680	920257	1438150	1444418	1	1		8alpha-O-(4-Hydroxy-2-methylenebutanoyloxy)-11beta,13-dihydro-4-epi-sonchucarpolide [ C20 H28 O7, tgt=37.06, overall=37.06 ]	(381.58804, 17806.965)(383.19458, 5416.1196)(385.1991, 396.59)(367.18195, 733.33496)(384.2007, 5787.14)(385.1987, 1129.11)(366.52402, 1060.3301)(398.2172, 68480.34)(399.2176, 8181.28)(383.66898, 3123.1846)(385.01688, 523.967)(404.0057, 567.11163)(389.17172, 40438.96)(390.17456, 5113.3525)
Euponin	Sesquiterpene lactones	1011949	855914	1862470	1952552	1207690	1194215		2033892	1534781	2654849	2606973	1208505	920631		Euponin [ C20 H24 O6, tgt=60.18, overall=60.18 ]	(360.16086, 1796.3539)(347.1603, 3747.377)(345.66217, 5990.43)(348.1645, 1104.49)(378.1862, 146.1)(387.10553, 100240.61)(388.09973, 13935.4795)(369.14526, 55684.457)(370.14957, 12205.457)
picriside A	Sesquiterpene lactones	14182112	1207066	207425	2131011	1528259	1507093		28602176	28869250	2648923	2437180	1506289	1456501		picriside A [ C21 H26 O10, tgt=67.34, overall=67.34 ]	(439.15076, 411842.94)(440.91223, 65576.15)(441.9176, 33785.02)(442.16858, 15164.066)(422.1461, 14529.256)(423.14615, 26366.35)(423.1531, 3674.8298)(441.16562, 115814.79)(442.16837, 17712.756)(443.17444, 17292.84)(423.65488, 4402.5254)(425.0462, 52591.57)(426.1564, 16726.37)(456.84274, 18158.027)(458.1975, 3106.9753)(439.13055, 5054.1265)(440.1869, 162.85)(462.9573, 14865.82)(464.01755, 3898.65)(…
Eupachloroxin	Sesquiterpene lactones	1183778	1163433	2041445	2155857	1516388	1660730		1510205	2577696	5196366	3984877	1794920	1711707		Eupachloroxin [ C20 H25 Cl O8, tgt=58.46, overall=58.46 ]	(430.83926, 8918.357)(432.43582, 937.27997)(433.1335, 5531.01)(410.7761, 21273.982)(412.28027, 15808.352)(414.1177, 6694.23)(431.12436, 19232.518)(432.12695, 1939.1425)(433.13412, 5250.783)(434.80862, 18957.25)(436.14154, 11509.035)(412.45203, 27532.979)(413.12042, 18257.895)(414.1176, 7906.565)(446.3241, 1552.7657)(447.15427, 372.0217)(428.85263, 3624.9375)(457.12732, 3770.7947)(458.129, 1307.6)…
pannonin	Sesquiterpene lactones	619531	638439	991360	1125661	1817948	1708670		1700854	1115712	2457401	3152854	1706290	1661526		pannonin [ C21 H26 O9, tgt=77.22, overall=77.22 ]	(423.28897, 5338.3853)(426.17062, 801.1501)(404.61267, 4691.7646)(405.14258, 1811.5901)(406.1326, 276.115)(425.17114, 266990.03)(426.1738, 53041.37)(427.9316, 23006.758)(406.32666, 8211.719)(440.64795, 3524.5037)(446.14825, 5286.7856)(447.6525, 1229.7267)(449.1604, 214.58)(431.14606, 1974.7772)
stizolicin	Sesquiterpene lactones	10928652	2383856	4382195	3649203	3137228	3011011		4488611	5119087	14784239	14300865	2469196	2336426		stizolicin [ C20 H26 O7, tgt=62.92, overall=62.92 ]	(381.1811, 2564.015)(360.162, 3847.54)(363.1758, 1930.94)(396.2018, 575488.44)(397.20355, 82885.3)(398.2051, 6529.451)(404.76425, 34087.57)(402.1539, 18914.76)(403.1553, 2244.38)(387.15582, 108096.88)(388.1593, 15280.001)
taraxafolide	Sesquiterpene lactones	4839509	4978497	3314931	6619540	798509	705972		9294057	9385593	9703819	1351469	822722	792431		taraxafolide [ C21 H28 O10, tgt=61.59, overall=61.59 ]	(442.587, 13162.843)(443.17865, 16884.484)(444.1828, 497.86)(424.79123, 7408.522)(443.18094, 42606.63)(444.1836, 6798.6177)(425.50565, 73845.27)(426.31516, 16661.807)(427.17725, 38338.926)(428.1819, 7139.1)(458.45163, 4511.6714)(440.9757, 8430.031)(464.66284, 784.03503)(465.1669, 1918.36)(447.1549, 990.1375)(447.1546, 814.22)
tetraidroridentinaB	Sesquiterpene lactones	100623	88901	291923	85193	795536	847511		350701	460812	363859	362078	847289	823371		tetraidroridentinaB [ C15 H24 O4, tgt=54.92, overall=54.92 ]	(270.31415, 13799.759)(270.1711, 466.7622)(251.82697, 18214.156)(252.16093, 905.98676)(271.18396, 112885.56)(272.18668, 11190.846)(291.1557, 1226.942)
Ambrosin	Sesquiterpene lactones	1627154	1640949	197975	201745	215160	216003		1676923	1684962	1649171	1679793	213048	201372		Ambrosin [ C15 H18 O3, tgt=60.82, overall=60.82 ]	(247.12677, 51519.13)(248.12996, 4187.466)(229.11864, 15763.56)(230.12354, 1271.705)(249.14148, 4197.325)(251.14403, 4489.4463)(266.1686, 2539.74)
15-acetoxy-8alpha-(3',4'-dihydroxy-2'-methylenebutanoyloxy)-1beta-hydroperoxy-7alpha,6beta-germacra-4E,10(14),11(13)-trien-12,6-olide	Sesquiterpene lactones	5658717	795753	4795744	11310311	8400958	8418520		4577731	4727423	21268270	21020974	8455019	8138828		15-acetoxy-8alpha-(3',4'-dihydroxy-2'-methylenebutanoyloxy)-1beta-hydroperoxy-7alpha,6beta-germacra-4E,10(14),11(13)-trien-12,6-olide [ C20 H24 O7, tgt=58.19, overall=58.19 ]	(362.90527, 5373.2373)(363.1564, 9075.68)(402.39685, 107173.875)(403.1529, 78646.97)(403.156, 18367.01)(404.1578, 620.28)(394.43777, 81451.94)(395.19165, 24225.775)(396.19815, 1469.156)(379.1656, 2262.47)(385.1405, 82104.125)(386.14322, 9989.938)
Tataroside	Sesquiterpene lactones	3976145	3979013	3594478	3661268	8471003	8661679		1	2189163	3241038	3205951	8426777	8161099		Tataroside [ C21 H32 O10, tgt=52.19, overall=52.19 ]	(446.19977, 6827.6743)(446.8728, 1153.9132)(447.2109, 5902.21)(427.18753, 338891.66)(428.19043, 54802.723)(429.19748, 18069.693)(447.21, 3184.71)(429.20023, 41694.277)(430.20343, 6723.3984)(431.2132, 3546.68)(467.68912, 25152.537)(468.68988, 4944.5366)
lanceocrepidiaside C	Sesquiterpene lactones	619980	660677	1772817	1664227	1339789	1342610		1743348	1718654	4387070	3282642	1226850	1218936		lanceocrepidiaside C [ C19 H34 O11, tgt=87.62, overall=87.62 ]	(438.21045, 1503.3726)(424.53934, 3638.5)(439.45462, 71247.39)(440.22607, 12041.677)(461.25812, 903.7)(439.9503, 214741.28)(441.48785, 57190.72)(443.24396, 9689.096)(463.20633, 48.350002)(445.1123, 12485.692)(446.1983, 1492.9299)(447.2049, 619.26)
lanceocrepidiaside B	Sesquiterpene lactones	1	5908698	167091	1	108693	11921708		80344	106923	781261	558431	89693	11223334		lanceocrepidiaside B [ C21 H36 O11, tgt=48.87, overall=48.87 ]	(447.91708, 6992.552)(448.21643, 2062.9766)(488.64548, 94171.89)(489.88467, 40427.895)(489.2134, 12344.757)(490.21527, 267.885)(482.25674, 867.89)(483.258, 49.27)(468.2351, 290.25)(471.11578, 133151.81)(472.21506, 39942.85)(473.2197, 13657.273)(474.221, 2897.4)(466.25674, 17905.996)(467.25916, 3413.3782)
lanceocrepidiaside A	Sesquiterpene lactones	3196328	3234412	6118424	6072121	6410947	6439593		9440571	5101477	8977225	8625100	3647935	3447884		lanceocrepidiaside A [ C21 H30 O9, tgt=91.22, overall=91.22 ]	(427.5873, 28740.45)(428.59454, 22555.29)(429.60263, 15265.317)(430.20444, 2104.9968)(408.5477, 61219.875)(410.05435, 20066.148)(411.19196, 53941.46)(412.19458, 8186.0234)(429.20084, 29714.861)(430.20422, 3973.1687)(431.21173, 2085.974)(411.19244, 638108.2)(412.19568, 127365.59)(413.1963, 31749.025)(414.1984, 2449.4978)(449.1787, 1205.645)(433.3729, 4176.414)(435.1742, 276.09)
lanceocrepidiaside E	Sesquiterpene lactones	2848184	2935007	1935101	1806088	1756982	1757003		518301	536510	1555453	1438548	1	1		lanceocrepidiaside E [ C29 H34 O11, tgt=40.53, overall=40.53 ]	(545.2111, 692.997)(559.2254, 2128.5151)(544.7119, 2128.7761)(542.2177, 1504.72)(583.2052, 15780.703)(584.208, 5866.31)(585.20605, 4210.285)(564.4221, 14040.5)(565.3009, 7936.867)(569.2073, 2392.73)
Kandavanolide	Sesquiterpene lactones	448995	434627	71225360	604911	684590	680560		420710	427897	2323774	17553156	665741	631896		Kandavanolide [ C17 H20 O5, tgt=53.53, overall=53.53 ]	(304.13425, 22361.594)(305.1459, 4325.72)(287.13126, 2083.644)(307.16333, 3955.3823)(330.08603, 36999.74)(330.73975, 4718.075)(312.61887, 867.73376)
lanceocrepidiaside D	Sesquiterpene lactones	1	542186	451702	1084490	283114	2797431		2299717	2117856	2682158	1571005	466863	529956		lanceocrepidiaside D [ C29H32O11, tgt= ]	(557.1927, 3219.34)(539.1792, 1608.31)(545.2034, 2185.51)(559.2263, 3891.93)(560.22925, 309.08002)(579.9789, 4188.012)(580.9856, 2491.208)(583.8625, 2070.4968)(563.0497, 15003.782)(564.58826, 8129.665)(566.1864, 5730.543)(567.1863, 1208.4166)
Antheindurolide A	Sesquiterpene lactones	1627154	1640949	1436995	1440648	1311022	1272515		1	1	1649171	1679793	1	1		Antheindurolide A [ C15 H20 O4, tgt=60.82, overall=60.82 ]	(247.12665, 50573.91)(248.12982, 4110.876)(267.152, 573.85876)
Elemacarmanin	Sesquiterpene lactones	307461	1	1	1	3517609	1		1320680	920257	1438150	1444418	1	1		Elemacarmanin [ C20 H28 O7, tgt=37.06, overall=37.06 ]	(381.58804, 17806.965)(383.19458, 5416.1196)(385.1991, 396.59)(367.18195, 733.33496)(384.2007, 5787.14)(385.1987, 1129.11)(366.52402, 1060.3301)(398.2172, 68480.34)(399.2176, 8181.28)(383.66898, 3123.1846)(385.01688, 523.967)(404.0057, 567.11163)(389.17172, 40438.96)(390.17456, 5113.3525)
Delphinidin 3-O-(6''-malonyl-glucoside)	Sesquiterpene lactones	1	1	1	1	1	1		1	1	222536	212850	1	1		Delphinidin 3-O-(6''-malonyl-glucoside) [ C24 H23 O15, tgt= ]	(553.10547, 10439.49)(554.61255, 1519.8375)(557.11145, 1955.705)(537.67755, 972.9928)(538.50916, 971.772)(571.1485, 879.8)(553.13306, 3751.5273)(557.086, 8658.41)(558.0867, 2803.06)(559.0842, 2143.7651)
9-O-Deacetylanthemolide D	Sesquiterpene lactones	10007731	9815026	12077956	3071178	14569120	14629437		10581243	2177760	12374919	12858440	13964771	13928093		9-O-Deacetylanthemolide D [ C17 H22 O7, tgt=92.37, overall=92.37 ]	(339.13495, 5697.8945)(321.125, 4978.29)(341.15097, 9250.715)(342.1474, 11659.28)(323.99878, 1564.193)(356.17093, 563306.8)(357.17316, 87824.69)(358.1769, 8586.963)(341.07535, 2864.1228)(361.1255, 7469.9985)(346.9245, 40153.418)(348.12863, 4207.2754)
8-O-acetylanthemolide B	Sesquiterpene lactones	6264584	6718601	11557678	11750436	9403873	9315048		7541040	7564356	17342460	17188528	7501060	9148208		8-O-acetylanthemolide B [ C17 H22 O8, tgt=64.49, overall=64.49 ]	(355.13104, 446861.75)(356.13394, 59528.664)(339.13306, 707.675)(357.1466, 701659.0)(358.1495, 98138.19)(339.13464, 11690.928)(340.13748, 1162.8351)(372.1637, 16079.522)(355.16266, 4874.72)(360.49542, 2585.3008)
9alpha,hydroxy-3-desoxyzaluzanin C	Sesquiterpene lactones	1627154	1640949	197975	201745	215160	216003		1676923	1684962	1649171	1679793	213048	201372		9alpha,hydroxy-3-desoxyzaluzanin C [ C15 H18 O3, tgt=60.82, overall=60.82 ]	(247.12677, 51519.13)(248.12996, 4187.466)(229.11864, 15763.56)(230.12354, 1271.705)(249.14148, 4197.325)(251.14403, 4489.4463)(266.1686, 2539.74)
ixerisoside A	Sesquiterpene lactones	2848184	2935007	1935101	1806088	1756982	1757003		518301	536510	1555453	1438548	1	1		ixerisoside A [ C29 H34 O11, tgt=40.53, overall=40.53 ]	(545.2111, 692.997)(559.2254, 2128.5151)(544.7119, 2128.7761)(542.2177, 1504.72)(583.2052, 15780.703)(584.208, 5866.31)(585.20605, 4210.285)(564.4221, 14040.5)(565.3009, 7936.867)(569.2073, 2392.73)
3-deacetyl-9-O-acetylsalograviolide A	Sesquiterpene lactones	448995	434627	71225360	604911	684590	680560		420710	427897	2323774	17553156	665741	631896		3-deacetyl-9-O-acetylsalograviolide A [ C17 H20 O5, tgt=53.53, overall=53.53 ]	(304.13425, 22361.594)(305.1459, 4325.72)(287.13126, 2083.644)(307.16333, 3955.3823)(330.08603, 36999.74)(330.73975, 4718.075)(312.61887, 867.73376)
ixerisoside B	Sesquiterpene lactones	6982052	7213638	9115493	9713522	11326975	12367078		8938927	8960538	1667448	1	10511527	10187836		ixerisoside B [ C30 H38 O12, tgt=91.90, overall=91.90 ]	(591.60547, 91983.42)(592.25397, 34979.543)(593.2674, 382181.66)(594.2705, 141706.19)(595.2731, 33406.65)(596.2747, 2879.0828)(613.23175, 4854.624)(614.2349, 658.7617)
Eupatundin	Sesquiterpene lactones	5658717	795753	4795744	11310311	8400958	8418520		4577731	4727423	21268270	21020974	8455019	8138828		Eupatundin [ C20 H24 O7, tgt=58.19, overall=58.19 ]	(362.90527, 5373.2373)(363.1564, 9075.68)(402.39685, 107173.875)(403.1529, 78646.97)(403.156, 18367.01)(404.1578, 620.28)(394.43777, 81451.94)(395.19165, 24225.775)(396.19815, 1469.156)(379.1656, 2262.47)(385.1405, 82104.125)(386.14322, 9989.938)
acidoglutammico	Sesquiterpene lactones	537793	394220	6607241	6616152	1066528	1001126		6273212	509847	5711864	5698180	1039779	985892		acidoglutammico [ C5 H9 N O4, tgt=76.14, overall=76.14 ]	(148.6303, 31892.557)(149.65889, 4388.4077)(131.04706, 8128.337)(150.06297, 76820.28)(149.30977, 6612.9546)(150.05536, 19427.354)(132.05457, 114093.58)(132.05315, 7687.371)(132.0536, 180.73499)(165.08595, 37101.09)(166.08919, 1641.7716)(147.0744, 120112.625)(148.0745, 585.96)(170.04172, 1195.2858)(154.81808, 1060.1843)(155.5408, 590.875)(155.03964, 1353.0249)
15-acetoxy-1beta,8alpha-dihydroperoxy-6beta,7alpha-germacra-4Z,10(14),11(13)-trien-6,12-olide	Sesquiterpene lactones	4129067	4940594	2907697	5796807	1456486	1468601		7234379	3839090	4847878	4805305	4182511	1408508		15-acetoxy-1beta,8alpha-dihydroperoxy-6beta,7alpha-germacra-4Z,10(14),11(13)-trien-6,12-olide [ C20 H26 O8, tgt=84.55, overall=84.55 ]	(395.76556, 9896.084)(397.17432, 11424.42)(397.9278, 7520.69)(379.16528, 4104.83)(397.17584, 15597.314)(398.1791, 2605.24)(379.5795, 4383.7534)(412.19574, 160752.61)(413.1987, 31644.053)(414.2035, 2397.431)(394.18567, 82551.836)(396.1984, 1341.1699)(419.1594, 1680.94)(401.14743, 1884.0736)
atticin	Sesquiterpene lactones	28074612	18915932	15695727	15836961	22486304	22782976		16939980	17045588	22014132	21466348	21847580	22305068		atticin [ C6 H10 O S2, tgt=67.92, overall=67.92 ]	(145.01305, 212.20667)(182.64749, 7145.8)(185.00578, 732319.3)(186.0085, 41058.926)(187.0073, 876.26)
Xanthatin	Sesquiterpene lactones	1627154	1640949	197975	201745	215160	216003		1676923	1684962	1649171	1679793	213048	201372		Xanthatin [ C15 H18 O3, tgt=60.82, overall=60.82 ]	(247.12677, 51519.13)(248.12996, 4187.466)(229.11864, 15763.56)(230.12354, 1271.705)(249.14148, 4197.325)(251.14403, 4489.4463)(266.1686, 2539.74)
11,13-Dehydrolanuginolide	Sesquiterpene lactones	6759247	933076	11756506	7444110	337279	1		2214833	4125411	14369012	445907	3861622	2753173		11,13-Dehydrolanuginolide [ C17 H22 O5, tgt=61.64, overall=61.64 ]	(288.1389, 1259.215)(308.82684, 1826.8932)(289.1466, 2690.4568)(306.171, 19652.05)(333.1458, 9619.39)(334.1475, 773.73)(315.1361, 60999.402)(316.13907, 6766.952)
Eremantholide-A	Sesquiterpene lactones	6116536	5765442	1	12617573	12650205	4160537		9993527	10011105	13354442	14039743	12585905	11913723		Eremantholide-A [ C19 H24 O6, tgt=71.17, overall=71.17 ]	(349.6624, 3532.535)(351.17188, 463.15002)(331.1561, 5178.8)(375.15488, 19041.15)(376.15906, 2247.9265)(357.1468, 577816.94)(358.14972, 79754.78)
epicebellin J	Sesquiterpene lactones	1	1	1	1	1203825	2591999		2877741	777404	4190255	2917394	2710130	2247271		epicebellin J [ C19H25ClO8, tgt= ]	(421.8764, 3304.2075)(422.132, 607.25)(399.11856, 1721.4016)(400.78955, 2187.9734)(439.5903, 12442.462)(417.70642, 7253.1143)(420.48447, 2463.2234)(423.1523, 266.08)(439.987, 51506.66)(442.44507, 5235.744)(441.1232, 593.91)(427.11267, 2134.1875)
15-deschloro-15-hydroperoxychlorojanerin	Sesquiterpene lactones	1353491	1311921	2810820	2809112	2391080	2391235		3608209	390004	6162206	6007050	2415803	2297570		15-deschloro-15-hydroperoxychlorojanerin [ C19 H24 O9, tgt=70.30, overall=70.30 ]	(398.25958, 16130.634)(401.15646, 6333.58)(380.81906, 60284.535)(380.53485, 19975.113)(399.15588, 152822.62)(400.1585, 19120.398)(401.1654, 57749.027)(402.1678, 13905.18)(381.36972, 320867.9)(382.14944, 52655.027)(414.2365, 12327.189)(416.1832, 21957.96)(396.16418, 2403.2366)(404.12817, 826.2)(406.1352, 576.92004)
zaluzanin D	Sesquiterpene lactones	374157	1	320335	333529	365940	359246		334816	326774	323355	295023	382979	1		zaluzanin D [ C17 H20 O4, tgt=47.19, overall=47.19 ]	(288.13895, 1138.205)(271.12598, 5744.355)(272.1293, 2116.2)(306.1706, 11974.211)(291.16833, 1103.6799)(315.13654, 136630.8)(316.13937, 13256.865)
new lactone closely related to linichlorin B	Sesquiterpene lactones	2019253	2147767	8589866	2340806	2140208	2152296		2167944	2333429	5676533	4686333	2160163	2152628		new lactone closely related to linichlorin B [ C19 H24 O7, tgt=63.20, overall=63.20 ]	(366.15833, 781.64)(346.1448, 4342.35)(370.168, 20949.81)(347.1516, 12482.878)(348.15332, 685.86)(390.84225, 57321.04)(392.15463, 10248.345)(372.6398, 145609.67)(373.64047, 16671.213)
1,10-epoxy-14-hydroxyhypocretenolide-beta-D-glucopyranoside	Sesquiterpene lactones	14182112	1207066	207425	2131011	1528259	1507093		28602176	28869250	2648923	2437180	1506289	1456501		1,10-epoxy-14-hydroxyhypocretenolide-beta-D-glucopyranoside [ C21 H26 O10, tgt=67.34, overall=67.34 ]	(439.15076, 411842.94)(440.91223, 65576.15)(441.9176, 33785.02)(442.16858, 15164.066)(422.1461, 14529.256)(423.14615, 26366.35)(423.1531, 3674.8298)(441.16562, 115814.79)(442.16837, 17712.756)(443.17444, 17292.84)(423.65488, 4402.5254)(425.0462, 52591.57)(426.1564, 16726.37)(456.84274, 18158.027)(458.1975, 3106.9753)(439.13055, 5054.1265)(440.1869, 162.85)(462.9573, 14865.82)(464.01755, 3898.65)(…
Mikanolide	Sesquiterpene lactones	977943	951626	1058087	1035233	962280	942592		1	1967435	322648	329559	1102923	936997		Mikanolide [ C15 H14 O6, tgt=64.64, overall=64.64 ]	(290.7448, 4718.1147)(276.7501, 20766.26)(293.09427, 6643.2095)(294.0961, 1513.25)(275.39777, 38156.62)(276.369, 3448.5305)(308.1146, 10927.498)(309.11707, 2371.8252)(292.7739, 1239.0868)(317.5785, 1277.6499)(295.79373, 6807.422)(297.0642, 461.61)
diidroconiferina	Sesquiterpene lactones	943035	917458	2548634	3615593	88782320	1039104		19448084	9577992	17149186	16834192	86724840	2031460		diidroconiferina [ C16 H24 O8, tgt=72.09, overall=72.09 ]	(345.5365, 217570.75)(346.14987, 41516.707)(347.15265, 5370.515)(327.26172, 548973.1)(328.13937, 166927.83)(347.16165, 37196.688)(348.16486, 5974.256)(349.1689, 1353.82)(329.15152, 176273.14)(330.1543, 18020.582)(331.15784, 7898.605)(362.17975, 6166.112)(363.17926, 970.4825)(345.4226, 79242.9)(345.1726, 6664.9136)(369.1452, 98920.625)(370.64694, 22099.893)(371.14276, 50421.215)(372.14505, 6414.82…
8a-O-(4,5-diacetoxyangeloyl)sonchucarpolide	Sesquiterpene lactones	265112	302379	519574	649139	770030	691716		499906	497494	4205962	2167655	722600	688192		8a-O-(4,5-diacetoxyangeloyl)sonchucarpolide [ C25 H32 O9, tgt=63.43, overall=63.43 ]	(476.7052, 7964.8647)(477.20773, 1311.365)(458.19748, 7490.029)(459.1975, 2173.8435)(462.71063, 1446.6201)(465.22168, 109.085)(495.6938, 23359.773)(496.25137, 5218.255)(479.2374, 232.02)(503.51093, 17192.652)(504.7852, 6600.44)(505.2121, 1874.5249)(485.1899, 12099.947)(486.7717, 5357.175)(487.20593, 19493.135)
Luteina/Zeaxantina	Sesquiterpene lactones	21110774	1	3016283	3545463	3339902	11981174		16094276	3558030	29427538	5640564	15884625	18703584		Luteina/Zeaxantina [ C40 H56 O2, tgt=56.17, overall=56.17 ]	(568.41986, 279526.8)(569.42303, 114241.914)(570.4255, 16986.807)(571.4286, 1154.3667)(551.4158, 28420.1)(552.4191, 12458.611)(553.4213, 1605.4467)(551.4168, 47841.383)(552.41974, 15823.176)(553.4217, 1549.1274)(589.6156, 8108.729)(590.4752, 2440.1892)(571.46136, 4693.735)(573.40265, 636.015)
acidovanillico	Sesquiterpene lactones	2200651	1857125	1781844	1916405	1776993	1915001		1992873	1835362	2071431	2086745	1893467	1696560		acidovanillico [ C8 H8 O4, tgt=69.26, overall=69.26 ]	(169.04443, 8964.063)(151.03246, 2230.444)(169.04933, 10281.756)(170.04553, 8045.866)(153.37944, 15731.198)(154.0469, 14303.4)(155.04895, 675.89)(187.07693, 86848.38)(188.07959, 11235.076)(173.0755, 8377.816)(196.0453, 1181.64)(177.0309, 374.23)
Centaurin	Sesquiterpene lactones	10928652	2383856	4382195	3649203	3137228	3011011		4488611	5119087	14784239	14300865	2469196	2336426		Centaurin [ C20 H26 O7, tgt=62.92, overall=62.92 ]	(381.1811, 2564.015)(360.162, 3847.54)(363.1758, 1930.94)(396.2018, 575488.44)(397.20355, 82885.3)(398.2051, 6529.451)(404.76425, 34087.57)(402.1539, 18914.76)(403.1553, 2244.38)(387.15582, 108096.88)(388.1593, 15280.001)
2alpha, 8alpha-dihydroxy-dehydrocostus lactone	Sesquiterpene lactones	812789	756726	983110	1016447	563308	541785		1619750	1595476	6492910	6358180	497143	494158		2alpha, 8alpha-dihydroxy-dehydrocostus lactone [ C15 H18 O4, tgt=94.31, overall=94.31 ]	(264.62653, 691.69995)(263.12778, 15684.95)(264.1316, 2970.9448)(247.12457, 4088.9453)(289.12115, 66635.98)(290.12405, 5166.688)(268.32346, 2421212.2)(269.10358, 391250.47)(270.10522, 46583.24)(271.1071, 2486.6184)
balsamin	Sesquiterpene lactones	493451	494695	866483	850248	1298055	620814		1720089	1713996	3915244	3766432	1137890	1258516		balsamin [ C20 H26 O6, tgt=68.33, overall=68.33 ]	(363.17447, 543.252)(347.63358, 4355.796)(345.1662, 2480.59)(348.17624, 15592.828)(350.18042, 2144.82)(384.21616, 1664.965)(385.2171, 332.608)(366.20566, 649.4175)(389.17062, 15008.605)(390.1746, 2836.4814)(371.16165, 324070.34)(372.16464, 46325.52)
sacylcynaropicrin	Sesquiterpene lactones	1626336	2045498	1460275	1463274	1136717	228239		1846143	1927879	446008	426028	691462	1766886		sacylcynaropicrin [ C15 H17 O5, tgt=63.90, overall=63.90 ]	(303.27164, 1140.4517)(261.10574, 6606.3774)(262.1091, 642.575)(278.25537, 7905.1045)(279.51282, 783.734)(281.12006, 38.045)(295.1414, 959.2)(279.11777, 1318.742)(281.1208, 90.1)(284.76205, 2186.5134)(285.7639, 795.8)(286.0976, 221.8)(278.526, 140567.17)(278.13644, 8601.934)(279.13046, 2442.2007)
Salograviolide A	Sesquiterpene lactones	6101877	6004349	10270677	41278036	39813112	42299936		11673916	43877712	99728464	98181376	41867916	39379856		Salograviolide A [ C17 H20 O6, tgt=77.33, overall=77.33 ]	(322.13156, 2074.89)(341.8834, 3309.5894)(324.15588, 824.645)(346.791, 48114.703)(347.74683, 5017.1006)(329.11572, 230827.86)(330.11865, 26834.408)
Hymenovin	Sesquiterpene lactones	1691118	1983424	1	161483	2235659	2212869		134257	655172	165308	892771	2084469	2013534		Hymenovin [ C15 H22 O5, tgt=65.40, overall=65.40 ]	(282.91583, 51422.125)(283.87668, 5757.467)(265.13693, 14340.443)(266.13968, 1298.25)(285.1638, 409.1)(306.68115, 2574.0586)
Malacitanolide	Sesquiterpene lactones	4129067	4940594	2907697	5796807	1456486	1468601		7234379	3839090	4847878	4805305	4182511	1408508		Malacitanolide [ C20 H26 O8, tgt=84.55, overall=84.55 ]	(395.76556, 9896.084)(397.17432, 11424.42)(397.9278, 7520.69)(379.16528, 4104.83)(397.17584, 15597.314)(398.1791, 2605.24)(379.5795, 4383.7534)(412.19574, 160752.61)(413.1987, 31644.053)(414.2035, 2397.431)(394.18567, 82551.836)(396.1984, 1341.1699)(419.1594, 1680.94)(401.14743, 1884.0736)
crispolide	Sesquiterpene lactones	278033	253000	507513	423101	255049	247417		1257298	1242682	5059106	4943867	243828	302304		crispolide [ C15 H20 O5, tgt=68.94, overall=68.94 ]	(280.73242, 5089.9614)(263.12155, 56577.582)(264.12448, 4865.048)(283.1456, 236.28)(263.12778, 19793.23)(264.1316, 3768.29)(289.1212, 107936.484)(290.12436, 11072.636)
8alpha-Tigloyloxyanthemolide C	Sesquiterpene lactones	18740056	18558220	31810936	4973575	25921776	3484765		4974747	4871877	5319012	6254609	26179346	3473389		8alpha-Tigloyloxyanthemolide C [ C22 H28 O8, tgt=43.87, overall=43.87 ]	(420.17682, 6616.9526)(421.17334, 1484.5782)(402.1726, 4082.9302)(404.84644, 1770.23)(446.7129, 8912.637)(448.17722, 1305.7001)(427.99673, 174304.97)(428.99905, 24505.08)
achillin	Sesquiterpene lactones	1627154	1640949	197975	201745	215160	216003		1676923	1684962	1649171	1679793	213048	201372		achillin [ C15 H18 O3, tgt=60.82, overall=60.82 ]	(247.12677, 51519.13)(248.12996, 4187.466)(229.11864, 15763.56)(230.12354, 1271.705)(249.14148, 4197.325)(251.14403, 4489.4463)(266.1686, 2539.74)
Artemisinin	Sesquiterpene lactones	1691118	1983424	1	161483	2235659	2212869		134257	655172	165308	892771	2084469	2013534		Artemisinin [ C15 H22 O5, tgt=65.40, overall=65.40 ]	(282.91583, 51422.125)(283.87668, 5757.467)(265.13693, 14340.443)(266.13968, 1298.25)(285.1638, 409.1)(306.68115, 2574.0586)
acidomalico	Sesquiterpene lactones	730932	6234747	2488796	2594006	489714	479411		277550	270353	119237	2001962	457445	441422		acidomalico [ C4 H6 O5, tgt=84.59, overall=84.59 ]	(139.0327, 1255.6675)(137.70058, 1108.4989)(154.14363, 26886.562)(153.05693, 4486.3276)(137.88606, 903386.06)(139.05585, 78271.16)(157.0094, 58255.85)(158.01074, 2459.9001)(139.8443, 4330.86)(140.0031, 2039.5)
procianidinaB2	Sesquiterpene lactones	505009	491753	1048933	628685	545972	540090		773211	522818	580485	922595	558687	526154		procianidinaB2 [ C30 H26 O12, tgt=48.21, overall=48.21 ]	(565.1451, 9354.74)(583.1529, 648.00006)(584.16046, 644.765)(585.1702, 15550.71)(587.1264, 4629.97)(579.17413, 23391.543)(580.1766, 4339.551)(581.17535, 2000.7202)
6-metil-1,3,8-triidrossiantrachinone	Sesquiterpene lactones	3208222	2882353	4486899	4516886	4377008	4264019		1428987	1438619	268555	267569	4052571	4089228		6-metil-1,3,8-triidrossiantrachinone [ C15 H10 O5, tgt=67.89, overall=67.89 ]	(271.06104, 2871.08)(256.89294, 13216.719)(257.89502, 3221.8877)(270.27792, 1742.3949)(275.03336, 79665.484)(276.03604, 3166.908)(277.03217, 134.59)
acidocitrico	Sesquiterpene lactones	39392664	37856880	2711030	29108316	2317930	2132302		12929984	12041648	12048831	12114109	2435970	2421305		acidocitrico [ C6 H8 O7, tgt=83.30, overall=83.30 ]	(192.69688, 939.9483)(197.0389, 213.43)(175.01755, 9002.465)(177.02145, 5497.905)(195.70866, 4247.375)(197.044, 418.59)(210.77458, 8451.22)(211.06165, 2510.525)(192.05229, 779.5229)(215.18091, 385335.03)(216.18376, 19280.4)(217.021, 629.287)(197.00348, 12843.62)(198.00443, 3009.874)
Tanacetin	Sesquiterpene lactones	1627154	1640949	1436995	1440648	1311022	1272515		1676923	1684962	1649171	1679793	1307619	1273653		Tanacetin [ C15 H20 O4, tgt=60.82, overall=60.82 ]	(247.12675, 49186.812)(248.1299, 3945.8254)(267.15207, 631.1909)
shiromool	Sesquiterpene lactones	733624	710272	716396	722848	733763	648536		258634	256457	306520	301336	1	694450		shiromool [ C15 H26 O2, tgt=77.26, overall=77.26 ]	(239.19658, 4313.387)(221.18648, 36012.875)(222.18951, 3639.6562)
urospermal A	Sesquiterpene lactones	2474850	2601097	2487343	2552055	2620142	2634943		2974942	2970655	2438943	2588978	2679689	2639392		urospermal A [ C15 H18 O5, tgt=59.37, overall=59.37 ]	(279.1158, 23141.7)(280.1189, 13463.233)(261.106, 66819.58)(262.10892, 5772.685)(281.13113, 7969.988)(282.13474, 1335.2084)(263.12067, 797.6549)
Ixerin?F	Sesquiterpene lactones	3196328	3234412	6118424	6072121	6410947	6439593		1	5101477	8977225	8625100	3647935	3447884		Ixerin?F [ C21 H30 O9, tgt=91.22, overall=91.22 ]	(427.5873, 28740.45)(428.59454, 22555.29)(429.60263, 15265.317)(430.20444, 2104.9968)(408.5685, 62453.332)(410.17993, 22059.861)(411.19196, 53941.46)(412.19458, 8186.0234)(429.20102, 32049.176)(430.20425, 4132.706)(431.21173, 2085.974)(411.19244, 708577.3)(412.19565, 134242.62)(413.19632, 35151.227)(414.1984, 2449.4978)(449.1787, 1205.645)(432.92227, 5191.1104)(435.1742, 276.09)
Amaralin	Sesquiterpene lactones	1627154	1640949	1436995	1440648	1311022	1272515		1676923	1684962	1649171	1679793	1307619	1273653		Amaralin [ C15 H20 O4, tgt=60.82, overall=60.82 ]	(247.12675, 49186.812)(248.1299, 3945.8254)(267.15207, 631.1909)
Ixerin?D	Sesquiterpene lactones	3196328	3234412	6118424	6072121	6410947	6439593		9440571	5101477	8977225	8625100	3647935	3447884		Ixerin?D [ C21 H30 O9, tgt=91.22, overall=91.22 ]	(427.5873, 28740.45)(428.59454, 22555.29)(429.60263, 15265.317)(430.20444, 2104.9968)(408.5477, 61219.875)(410.05435, 20066.148)(411.19196, 53941.46)(412.19458, 8186.0234)(429.20084, 29714.861)(430.20422, 3973.1687)(431.21173, 2085.974)(411.19244, 638108.2)(412.19568, 127365.59)(413.1963, 31749.025)(414.1984, 2449.4978)(449.1787, 1205.645)(433.3729, 4176.414)(435.1742, 276.09)
8-desoxyurospermal A	Sesquiterpene lactones	812789	756726	983110	1016447	563308	541785		1619750	1595476	6492910	6358180	497143	494158		8-desoxyurospermal A [ C15 H18 O4, tgt=94.31, overall=94.31 ]	(264.62653, 691.69995)(263.12778, 15684.95)(264.1316, 2970.9448)(247.12457, 4088.9453)(289.12115, 66635.98)(290.12405, 5166.688)(268.32346, 2421212.2)(269.10358, 391250.47)(270.10522, 46583.24)(271.1071, 2486.6184)
8alpha-hydroxy-15-oxo-5,7alpha,6beta-elema-1,3,11(13)trien-12,6-olide	Sesquiterpene lactones	140387248	136747296	384166	126164416	358276	371785		1	471421	532571	482161	367281	354209		8alpha-hydroxy-15-oxo-5,7alpha,6beta-elema-1,3,11(13)trien-12,6-olide [ C15 H19 O4, tgt=49.17, overall=49.17 ]	(264.73346, 6474.767)(264.1294, 1310.345)(246.40837, 2694.6255)(264.9705, 1734.8483)(247.12593, 1461.5267)(286.1713, 5600.04)(288.6924, 491212.94)(290.12506, 52807.74)
8-O-Isobutyryl-9alpha-acetoxycumambrin B	Sesquiterpene lactones	1342241	2173225	6432474	2158655	2155908	2342500		4591971	20757084	25269220	3256275	2629421	2730128		8-O-Isobutyryl-9alpha-acetoxycumambrin B [ C21 H28 O7, tgt=84.67, overall=84.67 ]	(393.07758, 164383.94)(394.1853, 28933.38)(395.1945, 54960.312)(397.2014, 3211.69)(395.19812, 606012.8)(396.20132, 131078.23)(397.20328, 19609.049)(398.20505, 2923.1987)(375.18344, 107952.66)(376.18506, 7492.6997)(414.22516, 2747.605)(419.18234, 89156.62)(420.18518, 11097.295)(401.1712, 74887.84)(402.17407, 9054.14)
tuberiferine	Sesquiterpene lactones	1627154	1640949	197975	201745	215160	216003		1676923	1684962	1649171	1679793	213048	201372		tuberiferine [ C15 H18 O3, tgt=60.82, overall=60.82 ]	(247.12677, 51519.13)(248.12996, 4187.466)(229.11864, 15763.56)(230.12354, 1271.705)(249.14148, 4197.325)(251.14403, 4489.4463)(266.1686, 2539.74)
Hymenin	Sesquiterpene lactones	812789	756726	983110	1016447	563308	541785		1619750	1595476	6492910	6358180	497143	494158		Hymenin [ C15 H18 O4, tgt=94.31, overall=94.31 ]	(264.62653, 691.69995)(263.12778, 15684.95)(264.1316, 2970.9448)(247.12457, 4088.9453)(289.12115, 66635.98)(290.12405, 5166.688)(268.32346, 2421212.2)(269.10358, 391250.47)(270.10522, 46583.24)(271.1071, 2486.6184)
Ixerin?Z	Sesquiterpene lactones	619531	638439	991360	1125661	1817948	1708670		1700854	1115712	2457401	3152854	1706290	1661526		Ixerin?Z [ C21 H26 O9, tgt=77.22, overall=77.22 ]	(423.28897, 5338.3853)(426.17062, 801.1501)(404.61267, 4691.7646)(405.14258, 1811.5901)(406.1326, 276.115)(425.17114, 266990.03)(426.1738, 53041.37)(427.9316, 23006.758)(406.32666, 8211.719)(440.64795, 3524.5037)(446.14825, 5286.7856)(447.6525, 1229.7267)(449.1604, 214.58)(431.14606, 1974.7772)
Ixerin?Y	Sesquiterpene lactones	1877847	1	5283522	5047406	3362182	3761130		8947982	9143697	9461109	11016090	3395591	3734832		Ixerin?Y [ C21 H28 O9, tgt=73.20, overall=73.20 ]	(425.57343, 144254.6)(426.64908, 30377.496)(427.4354, 66297.125)(428.18753, 12583.009)(406.41605, 12144.53)(407.17157, 2357.1348)(427.1872, 323327.34)(428.19028, 54081.32)(429.19717, 22321.148)(430.19763, 987.87)(408.98587, 222091.42)(410.1798, 45312.8)(442.20453, 4211.25)(425.20444, 996.59393)(447.1622, 3498.348)(433.15945, 918.95996)
3-Desoxysoistitialin A	Sesquiterpene lactones	1627154	1640949	1436995	1440648	1311022	1272515		1676923	1684962	1649171	1679793	1307619	1273653		3-Desoxysoistitialin A [ C15 H20 O4, tgt=60.82, overall=60.82 ]	(247.12675, 49186.812)(248.1299, 3945.8254)(267.15207, 631.1909)
Pulmatin	Sesquiterpene lactones	1087505	1078354	1107868	1096087	1485358	1468304		665322	640136	2558565	558774	1457487	1423987		Pulmatin [ C21 H20 O9, tgt=79.68, overall=79.68 ]	(417.60992, 1869.1001)(419.1149, 1279.67)(399.1005, 1771.57)(399.10916, 4449.346)(434.2542, 6472.6445)(436.1496, 4765.75)(417.67242, 60462.87)(418.44852, 8454.681)(419.13953, 959.19495)(441.10867, 16355.862)(442.1112, 2388.2732)(443.1108, 1025.9017)(423.09848, 2024.75)
(1E,4Z)-15-hydroxy-8alpha-O-[(4-acetoxy-3-hydroxy-2-methylenebutanoyl)oxy]-6betaH,7alphaH-germacra-1,4,11(13)-trien-6,12-olide	Sesquiterpene lactones	18740056	18558220	31810936	4973575	25921776	3484765		4974747	4871877	5319012	6254609	26179346	3473389		(1E,4Z)-15-hydroxy-8alpha-O-[(4-acetoxy-3-hydroxy-2-methylenebutanoyl)oxy]-6betaH,7alphaH-germacra-1,4,11(13)-trien-6,12-olide [ C22 H28 O8, tgt=43.87, overall=43.87 ]	(420.17682, 6616.9526)(421.17334, 1484.5782)(402.1726, 4082.9302)(404.84644, 1770.23)(446.7129, 8912.637)(448.17722, 1305.7001)(427.99673, 174304.97)(428.99905, 24505.08)
Provincialin	Sesquiterpene lactones	376400	381475	1510106	1405756	881038	887353		882821	862838	4741467	3728116	872851	825885		Provincialin [ C27 H34 O10, tgt=54.74, overall=54.74 ]	(518.7154, 71661.48)(520.2149, 28407.32)(502.16, 28501.988)(504.21124, 11289.723)(505.21182, 1520.4)(519.229, 360.83002)(502.46924, 2029.3217)(521.24756, 8561.835)(522.2507, 2577.37)(523.2531, 299.14)(544.20996, 2434.51)(527.6482, 1385.0266)(529.2156, 2071.2449)
episolstiolide	Sesquiterpene lactones	1000352	282956	1007657	1752628	845727	843106		2238945	2221568	2958325	2863286	815550	1277701		episolstiolide [ C19 H23 Cl O7, tgt=55.62, overall=55.62 ]	(399.78647, 1262.5083)(380.46472, 2510.3538)(381.1047, 2063.92)(401.90237, 16107.451)(401.62692, 4987.85)(401.1185, 6728.19)(381.1093, 29513.143)(382.11203, 3366.4897)(383.10675, 1900.49)(417.62576, 2433.602)(399.3744, 26142.584)(401.63928, 1946.803)(403.1425, 2043.29)(427.1128, 2562.18)(406.09845, 12261.556)(405.29785, 826.988)
19-desoxypicrolide A	Sesquiterpene lactones	1249928	1252166	1248563	1557945	1572281	1520082		2530309	536873	2453007	1880284	1545348	1472862		19-desoxypicrolide A [ C26 H28 O9, tgt=73.76, overall=73.76 ]	(487.93317, 1487.9076)(471.1695, 9773.885)(472.1774, 257.03)(490.19073, 408.36)(471.56204, 25620.477)(472.32278, 7063.7344)(473.18945, 11231.507)(504.14508, 34782.93)(504.21146, 10750.714)(505.21173, 1449.7529)(487.2068, 61514.664)(488.20975, 9934.635)(489.21213, 1896.2476)(512.1058, 700.65076)(511.84464, 323.82666)(511.1678, 376.59)(513.1802, 55.23)(491.93365, 2354.2717)
diidrosiringina	Sesquiterpene lactones	32042280	32748072	37319856	36939032	38573240	38429180		42394236	41210864	49141304	47990632	38429968	37433772		diidrosiringina [ C17 H26 O9, tgt=92.95, overall=92.95 ]	(375.82742, 14363.113)(357.23404, 935125.6)(358.14966, 140361.14)(359.15637, 51004.26)(360.16058, 6147.0283)(377.17126, 5299.6567)(359.16122, 81960.88)(360.16428, 7422.5674)(394.19568, 7322.7397)(374.24017, 534897.3)(375.18356, 99166.47)(376.1849, 7708.807)(399.15552, 78656.52)(400.30902, 13141.614)(402.1581, 1248.3367)(381.14423, 4893.7935)
8alpha-O-(3,4-dihydroxy-2-methylenebutanoyloxy)-dehydromelitensin	Sesquiterpene lactones	10928652	2383856	4382195	3649203	3137228	3011011		4488611	5119087	14784239	14300865	2469196	2336426		8alpha-O-(3,4-dihydroxy-2-methylenebutanoyloxy)-dehydromelitensin [ C20 H26 O7, tgt=62.92, overall=62.92 ]	(381.1811, 2564.015)(360.162, 3847.54)(363.1758, 1930.94)(396.2018, 575488.44)(397.20355, 82885.3)(398.2051, 6529.451)(404.76425, 34087.57)(402.1539, 18914.76)(403.1553, 2244.38)(387.15582, 108096.88)(388.1593, 15280.001)
heliangolide	Sesquiterpene lactones	18740056	18558220	31810936	4973575	25921776	3484765		4974747	4871877	5319012	6254609	26179346	3473389		heliangolide [ C22 H28 O8, tgt=43.87, overall=43.87 ]	(420.17682, 6616.9526)(421.17334, 1484.5782)(402.1726, 4082.9302)(404.84644, 1770.23)(446.7129, 8912.637)(448.17722, 1305.7001)(427.99673, 174304.97)(428.99905, 24505.08)
chinensiolide E	Sesquiterpene lactones	2847984	2849818	7054713	7247895	5483447	5512911		3350552	3468104	3185584	3225717	5262427	5096756		chinensiolide E [ C37 H42 O13, tgt=64.02, overall=64.02 ]	(676.25995, 201929.02)(677.2583, 64397.137)(678.2585, 13688.365)(679.25946, 1379.9199)(677.2589, 102070.18)(678.2594, 22083.719)(679.26044, 2389.009)(713.30414, 6851.0273)(714.306, 1328.8201)
apigenin-7-glucoside	Sesquiterpene lactones	92631	93722	126267	164297	136529	138137		167730	157967	298296	298760	146045	130016		apigenin-7-glucoside [ C21 H20 O10, tgt=52.43, overall=52.43 ]	(433.10538, 131312.83)(434.10797, 21300.26)(435.11124, 4190.0728)(415.89883, 1520.8679)(419.11456, 2071.205)(455.15128, 1258.35)(434.4692, 11357.981)(433.12274, 810.695)(456.42593, 33817.508)(456.09155, 34098.16)(457.09338, 4319.1797)(437.94806, 7605.077)(442.0972, 2505.78)
Eupaformosanin	Sesquiterpene lactones	18740056	18558220	31810936	4973575	25921776	3484765		4974747	4871877	5319012	6254609	26179346	3473389		Eupaformosanin [ C22 H28 O8, tgt=43.87, overall=43.87 ]	(420.17682, 6616.9526)(421.17334, 1484.5782)(402.1726, 4082.9302)(404.84644, 1770.23)(446.7129, 8912.637)(448.17722, 1305.7001)(427.99673, 174304.97)(428.99905, 24505.08)
Salonitenolide 8-(4'-Acetoxy-5'-Hydroxyangelate)	Sesquiterpene lactones	287834	959403	706038	1144574	1092716	1122347		271538	109988	675914	659561	1077062	1072034		Salonitenolide 8-(4'-Acetoxy-5'-Hydroxyangelate) [ C20 H26 O5, tgt=55.41, overall=55.41 ]	(348.27347, 9067.437)(348.18008, 438.91202)(329.16772, 10849.776)(330.1697, 670.44)(349.3031, 4394.8877)(350.19656, 2506.355)(331.1831, 9362.916)(332.1852, 922.8733)(350.2112, 1306.56)(372.31888, 54694.223)(373.84497, 8961.978)(354.41467, 28883.605)(355.91913, 615431.8)(356.1713, 387678.28)
acidocaffeico	Sesquiterpene lactones	1	786045	1	1535870	13969075	13694189		21891956	21818024	25497980	26267050	13268722	12678359		acidocaffeico [ C9 H8 O4, tgt=47.62, overall=47.62 ]	(181.0466, 26004.53)(182.0495, 5544.76)(166.6431, 68578.04)(183.62672, 15847.164)(183.05391, 18878.01)(163.83919, 425749.5)(164.0397, 37854.0)(165.04337, 2000.2039)(201.0835, 3343.185)(205.81822, 3538.559)
Lactuside?C	Sesquiterpene lactones	1877847	1	5283522	5047406	3362182	3761130		8947982	9143697	9461109	11016090	3395591	3734832		Lactuside?C [ C21 H28 O9, tgt=73.20, overall=73.20 ]	(425.57343, 144254.6)(426.64908, 30377.496)(427.4354, 66297.125)(428.18753, 12583.009)(406.41605, 12144.53)(407.17157, 2357.1348)(427.1872, 323327.34)(428.19028, 54081.32)(429.19717, 22321.148)(430.19763, 987.87)(408.98587, 222091.42)(410.1798, 45312.8)(442.20453, 4211.25)(425.20444, 996.59393)(447.1622, 3498.348)(433.15945, 918.95996)
Lactuside?A	Sesquiterpene lactones	3196328	3234412	6118424	6072121	6410947	6439593		9440571	5101477	8977225	8625100	3647935	3447884		Lactuside?A [ C21 H30 O9, tgt=91.22, overall=91.22 ]	(427.5873, 28740.45)(428.59454, 22555.29)(429.60263, 15265.317)(430.20444, 2104.9968)(408.5477, 61219.875)(410.05435, 20066.148)(411.19196, 53941.46)(412.19458, 8186.0234)(429.20084, 29714.861)(430.20422, 3973.1687)(431.21173, 2085.974)(411.19244, 638108.2)(412.19568, 127365.59)(413.1963, 31749.025)(414.1984, 2449.4978)(449.1787, 1205.645)(433.3729, 4176.414)(435.1742, 276.09)
Inulicin	Sesquiterpene lactones	198802	192628	655710	292491	544859	594780		222916	222590	470641	452736	604240	578290		Inulicin [ C17 H24 O5, tgt=58.27, overall=58.27 ]	(309.16147, 3958.5566)(290.15475, 3538.4119)(311.17783, 35051.49)(312.17996, 3612.627)(336.16943, 734.97)(317.15155, 13621.892)(318.1545, 1157.3857)
Lactuside?B	Sesquiterpene lactones	949482	24858644	2912171	35623608	21962924	21800160		44073896	43549780	19476242	17637072	21398274	21034322		Lactuside?B [ C21 H32 O9, tgt=60.51, overall=60.51 ]	(429.98508, 23636.037)(430.20468, 4700.792)(431.21432, 1458.6699)(411.19278, 830105.7)(412.1959, 152371.4)(413.41592, 34399.434)(414.20584, 5011.8115)(431.2167, 1429.21)(413.20667, 61993.41)(414.21, 8557.818)(415.2138, 1199.49)(430.23553, 4463.8823)(431.23682, 1151.61)(453.20053, 6780.181)(454.20386, 1432.405)(433.47318, 3540.404)
8-O-Isobutyryl-9-O-acetylanthemolide B	Sesquiterpene lactones	1877847	1	5283522	5047406	3362182	3761130		8947982	9143697	9461109	11016090	3395591	3734832		8-O-Isobutyryl-9-O-acetylanthemolide B [ C21 H28 O9, tgt=73.20, overall=73.20 ]	(425.57343, 144254.6)(426.64908, 30377.496)(427.4354, 66297.125)(428.18753, 12583.009)(406.41605, 12144.53)(407.17157, 2357.1348)(427.1872, 323327.34)(428.19028, 54081.32)(429.19717, 22321.148)(430.19763, 987.87)(408.98587, 222091.42)(410.1798, 45312.8)(442.20453, 4211.25)(425.20444, 996.59393)(447.1622, 3498.348)(433.15945, 918.95996)
15-acetoxy-1beta-hydroperoxy,8alpha-hydroxy-7alpha,6beta-germacra-4E,10(14),11(13)-trien-12,6-olide	Sesquiterpene lactones	368695	324064	477337	6877323	5285151	5397662		174863	171120	13329863	1	5412770	5265279		15-acetoxy-1beta-hydroperoxy,8alpha-hydroxy-7alpha,6beta-germacra-4E,10(14),11(13)-trien-12,6-olide [ C17 H21 O6, tgt=45.16, overall=45.16 ]	(323.1398, 2369.36)(304.62662, 29985.6)(305.62888, 3064.22)(304.13422, 30818.756)(305.14545, 4555.69)(339.1716, 22819.17)(340.1745, 2340.04)(321.15695, 1604.2933)(322.1559, 210.27)(346.46103, 27694.53)(348.1289, 7125.8003)(327.9163, 432355.6)(328.91974, 47410.477)(329.92273, 11256.737)
(5R,6R,7R,8S,10S,11S-15-Hydroxy-8-(1,2-dihydroxyethyl)-acryloxyelema-l,3-dien-6,12-olide	Sesquiterpene lactones	452888	339453	1450728	1228295	357252	1227909		975228	1458232	1066893	1142861	579857	325642		(5R,6R,7R,8S,10S,11S-15-Hydroxy-8-(1,2-dihydroxyethyl)-acryloxyelema-l,3-dien-6,12-olide [ C19 H25 O7, tgt=55.82, overall=55.82 ]	(369.5012, 17876.344)(348.81924, 3811.1768)(367.17047, 19847.574)(368.5122, 3858.1033)(369.17932, 787.935)(348.1554, 4085.2324)(365.18665, 7568.31)(390.4064, 23025.021)(391.16058, 4934.539)(392.41223, 957.9725)(374.3515, 37880.98)(372.14484, 14305.855)(375.1548, 297.96)
notoserolide A	Sesquiterpene lactones	619531	638439	991360	1125661	1817948	1708670		1700854	1115712	2457401	3152854	1706290	1661526		notoserolide A [ C21 H26 O9, tgt=77.22, overall=77.22 ]	(423.28897, 5338.3853)(426.17062, 801.1501)(404.61267, 4691.7646)(405.14258, 1811.5901)(406.1326, 276.115)(425.17114, 266990.03)(426.1738, 53041.37)(427.9316, 23006.758)(406.32666, 8211.719)(440.64795, 3524.5037)(446.14825, 5286.7856)(447.6525, 1229.7267)(449.1604, 214.58)(431.14606, 1974.7772)
notoserolide B	Sesquiterpene lactones	287834	959403	706038	1144574	1092716	1122347		271538	109988	675914	659561	1077062	1072034		notoserolide B [ C20 H26 O5, tgt=55.41, overall=55.41 ]	(348.27347, 9067.437)(348.18008, 438.91202)(329.16772, 10849.776)(330.1697, 670.44)(349.3031, 4394.8877)(350.19656, 2506.355)(331.1831, 9362.916)(332.1852, 922.8733)(350.2112, 1306.56)(372.31888, 54694.223)(373.84497, 8961.978)(354.41467, 28883.605)(355.91913, 615431.8)(356.1713, 387678.28)
Chlorohyssopifolin E	Sesquiterpene lactones	585408	643642	1384367	848356	1203825	2591999		2877741	777404	4190255	2917394	2710130	2247271		Chlorohyssopifolin E [ C19 H25 Cl O8, tgt=48.69, overall=48.69 ]	(419.83942, 10586.112)(419.12787, 2234.4375)(419.1252, 374.27)(399.11856, 1721.4016)(419.13788, 8908.1)(418.1387, 1476.14)(399.95554, 31984.533)(400.12442, 8893.66)(401.1188, 8490.61)(440.1149, 16608.322)(418.06042, 6150.041)(420.48447, 2463.2234)(423.1523, 266.08)(439.9356, 48604.35)(442.44507, 5235.744)(441.1232, 593.91)(425.91022, 1825.4401)
Chlorohyssopifolin D	Sesquiterpene lactones	1437859	1506033	1326051	1270973	1363996	1353256		9345222	9856988	8634190	7486399	1229449	1199729		Chlorohyssopifolin D [ C21 H29 Cl O8, tgt=58.86, overall=58.86 ]	(445.95444, 8086.7407)(446.15695, 974.29004)(447.1539, 476.22)(429.1452, 112765.52)(430.1479, 17987.66)(447.15677, 4918.567)(449.66602, 926.8925)(428.14908, 54296.83)(429.15253, 9005.607)(431.2856, 39670.695)(432.28815, 5698.407)(433.16458, 456.53665)(469.1954, 18910.096)(448.55862, 3029.0615)(448.1756, 1250.25)(467.545, 45082.93)(468.5478, 7705.211)(469.15, 4727.335)(452.7413, 6618.9834)
Budlein-A	Sesquiterpene lactones	5595003	5730779	10044521	9781342	6863544	6899984		40075472	40237544	12663499	13055856	7055808	6805467		Budlein-A [ C20 H22 O7, tgt=56.45, overall=56.45 ]	(401.1341, 31007.684)(402.138, 5493.068)(361.14038, 44452.316)(362.14328, 5768.2617)(374.35507, 8054.9375)(375.124, 1374.1556)(375.1454, 788.28)(383.1238, 31039.092)(384.12686, 3640.515)(377.17175, 32562.96)(378.17398, 3906.8923)
Chlorohyssopifolin C	Sesquiterpene lactones	1000352	282956	1007657	1752628	845727	843106		2238945	2221568	2958325	2863286	815550	1277701		Chlorohyssopifolin C [ C19 H23 Cl O7, tgt=55.62, overall=55.62 ]	(399.78647, 1262.5083)(380.46472, 2510.3538)(381.1047, 2063.92)(401.90237, 16107.451)(401.62692, 4987.85)(401.1185, 6728.19)(381.1093, 29513.143)(382.11203, 3366.4897)(383.10675, 1900.49)(417.62576, 2433.602)(399.3744, 26142.584)(401.63928, 1946.803)(403.1425, 2043.29)(427.1128, 2562.18)(406.09845, 12261.556)(405.29785, 826.988)
Chlorohyssopifolin B	Sesquiterpene lactones	5802162	3411558	5801544	4115295	5867466	5689792		3816808	3648038	6839974	6806765	5547117	5589297		Chlorohyssopifolin B [ C15 H19 Cl O5, tgt=62.18, overall=62.18 ]	(316.84192, 43352.062)(321.0974, 160.22)(301.0841, 1380.255)(315.09964, 70650.625)(316.1007, 6163.714)(317.0965, 3800.391)(300.87872, 47409.344)(302.34674, 2567.7776)(334.52582, 42763.855)(336.12872, 5960.677)(337.13046, 2506.6233)(316.50677, 77208.9)(318.11874, 15014.676)(338.74817, 13923.507)(339.7053, 6113.46)(342.33975, 6858.162)(343.09314, 381.93)(319.57162, 2582.739)
11beta,13 dihydrosalonitenolide	Sesquiterpene lactones	40975296	100547304	57350488	56563496	116075296	59858748		101905456	102710736	119581280	117052488	65179712	64054192		11beta,13 dihydrosalonitenolide [ C19 H26 O6, tgt=64.53, overall=64.53 ]	(350.53452, 30698.07)(351.17093, 10761.042)(333.16068, 397.4725)(353.1871, 8682.42)(354.18967, 837.15)(376.39258, 23320.926)(378.1742, 3448.9263)(358.9006, 168847.58)(359.8307, 17263.57)
cynaropicrin sauprin	Sesquiterpene lactones	15548034	15434876	12159829	12046629	18688950	14178211		21926798	14771271	30469404	25315994	13918347	13465924		cynaropicrin sauprin [ C19 H22 O6, tgt=72.72, overall=72.72 ]	(373.13974, 149952.75)(374.14258, 16693.352)(333.1453, 766.86005)(347.1483, 3180.923)(369.1836, 153.43)(347.15222, 7426.9536)(355.13034, 226194.64)(356.1339, 40285.69)(349.1773, 23166.271)(350.1805, 2135.697)(351.1823, 740.4)
2alpha-hydroxy, 8-dehydroxy 15-O-methacrylate salonitenolide	Sesquiterpene lactones	22238154	22475228	5303462	4971282	47347180	4982303		753080	728955	9646691	9997163	4805715	4908279		2alpha-hydroxy, 8-dehydroxy 15-O-methacrylate salonitenolide [ C19 H24 O5, tgt=55.98, overall=55.98 ]	(334.67166, 4210.5703)(318.15945, 1629.5566)(334.17233, 8832.582)(335.17554, 1080.96)(359.15988, 3403.303)(360.1688, 408.52002)(341.15103, 31360.355)(342.15247, 6823.9927)
4beta,15-Dihydro-3-dehydrosolstitialin A diacetate	Sesquiterpene lactones	2019253	2147767	8589866	2340806	2140208	2152296		2167944	2333429	5676533	4686333	2160163	2152628		4beta,15-Dihydro-3-dehydrosolstitialin A diacetate [ C19 H24 O7, tgt=63.20, overall=63.20 ]	(366.15833, 781.64)(346.1448, 4342.35)(370.168, 20949.81)(347.1516, 12482.878)(348.15332, 685.86)(390.84225, 57321.04)(392.15463, 10248.345)(372.6398, 145609.67)(373.64047, 16671.213)
Isotenulin	Sesquiterpene lactones	6759247	933076	11756506	7444110	337279	1		2214833	4125411	14369012	445907	3861622	2753173		Isotenulin [ C17 H22 O5, tgt=61.64, overall=61.64 ]	(288.1389, 1259.215)(308.82684, 1826.8932)(289.1466, 2690.4568)(306.171, 19652.05)(333.1458, 9619.39)(334.1475, 773.73)(315.1361, 60999.402)(316.13907, 6766.952)
catechinaidrata	Sesquiterpene lactones	621763	1	2601483	1573551	1091297	1063953		1	2406936	4747630	2419523	1043423	1032811		catechinaidrata [ C15 H16 O7, tgt=44.54, overall=44.54 ]	(308.5045, 137598.55)(309.59076, 15502.945)(310.0846, 10476.705)(290.78012, 9818.39)(291.74826, 1627.7666)(311.10443, 2151.0183)(328.46524, 5490.763)(308.1166, 3617.9941)(309.1195, 134.465)(333.58524, 4815.281)(317.0784, 2375.6865)
onopordopicrin	Sesquiterpene lactones	6116536	5765442	1	12617573	12650205	4160537		9993527	10011105	13354442	14039743	12585905	11913723		onopordopicrin [ C19 H24 O6, tgt=71.17, overall=71.17 ]	(349.6624, 3532.535)(351.17188, 463.15002)(331.1561, 5178.8)(375.15488, 19041.15)(376.15906, 2247.9265)(357.1468, 577816.94)(358.14972, 79754.78)
Canin	Sesquiterpene lactones	2474850	2601097	2487343	2552055	2620142	2634943		2974942	2970655	2438943	2588978	2679689	2639392		Canin [ C15 H18 O5, tgt=59.37, overall=59.37 ]	(279.1158, 23141.7)(280.1189, 13463.233)(261.106, 66819.58)(262.10892, 5772.685)(281.13113, 7969.988)(282.13474, 1335.2084)(263.12067, 797.6549)
(1R,3S,4S,5S,6S,7R,8S)-4beta-(chloromethyl)-3beta,4alpha-dihydroxy,8alpha-(sarracenoyloxy)-1alphaH, 5alphaH,6betaH,7alphaH-guai-10(14),11(13)-dien-6,12-olide	Sesquiterpene lactones	911886	1286227	17024308	16866608	13802583	13630972		20821650	7202778	31714208	13118643	13966182	13250310		(1R,3S,4S,5S,6S,7R,8S)-4beta-(chloromethyl)-3beta,4alpha-dihydroxy,8alpha-(sarracenoyloxy)-1alphaH, 5alphaH,6betaH,7alphaH-guai-10(14),11(13)-dien-6,12-olide [ C20 H25 Cl O7, tgt=69.00, overall=69.00 ]	(413.22784, 2528.5413)(414.12872, 4823.4697)(395.12366, 5166.3237)(399.12024, 3000.5225)(400.12335, 178.87)(415.71124, 12054.866)(416.1339, 2727.485)(417.13696, 8200.365)(418.13925, 804.31)(395.12534, 469930.56)(396.12817, 73278.78)(397.1347, 33797.79)(398.13666, 2457.9)(430.7753, 5637.2515)(433.1702, 1358.2374)(413.88934, 31051.727)(416.15292, 5716.717)(417.1522, 14364.504)(437.78656, 12932.336)…
Isoalantolactone	Sesquiterpene lactones	3941069	360681	1396210	1374523	1314454	1231967		1124654	1121931	208779	690404	716963	724902		Isoalantolactone [ C15 H20 O2, tgt=75.31, overall=75.31 ]	(233.14824, 40027.598)(234.14937, 8471.506)(235.1523, 764.06)(214.6363, 37319.406)(215.13994, 1859.1466)(218.1533, 1363.7)(255.13629, 227.38501)(241.13724, 2347.7244)
4'-acetylcnicin	Sesquiterpene lactones	18740056	18558220	31810936	4973575	25921776	3484765		4974747	4871877	5319012	6254609	26179346	3473389		4'-acetylcnicin [ C22 H28 O8, tgt=43.87, overall=43.87 ]	(420.17682, 6616.9526)(421.17334, 1484.5782)(402.1726, 4082.9302)(404.84644, 1770.23)(446.7129, 8912.637)(448.17722, 1305.7001)(427.99673, 174304.97)(428.99905, 24505.08)
14-hydroxyhypocretenolide-beta-D-glucopyranoside	Sesquiterpene lactones	619531	638439	991360	1125661	1817948	1708670		1700854	1115712	2457401	3152854	1706290	1661526		14-hydroxyhypocretenolide-beta-D-glucopyranoside [ C21 H26 O9, tgt=77.22, overall=77.22 ]	(423.28897, 5338.3853)(426.17062, 801.1501)(404.61267, 4691.7646)(405.14258, 1811.5901)(406.1326, 276.115)(425.17114, 266990.03)(426.1738, 53041.37)(427.9316, 23006.758)(406.32666, 8211.719)(440.64795, 3524.5037)(446.14825, 5286.7856)(447.6525, 1229.7267)(449.1604, 214.58)(431.14606, 1974.7772)
Ferolide	Sesquiterpene lactones	4407503	3813527	2994228	9021043	5965501	5761934		11620227	1	4785838	17396232	1835875	5830246		Ferolide [ C22 H26 O7, tgt=55.55, overall=55.55 ]	(402.17172, 1540.225)(389.1686, 10631.224)(406.51486, 2621.365)(405.98495, 1612.9636)(406.1999, 1955.3)(407.2023, 108.98)(427.81458, 89760.04)(428.78348, 13593.489)(427.1506, 12861.08)(411.15622, 86429.086)(412.15918, 16027.924)
Ursiniolide-A	Sesquiterpene lactones	41648296	42970856	6103092	6369809	47587944	47269204		10175402	10321129	14406939	14350165	47704300	47094016		Ursiniolide-A [ C22 H28 O7, tgt=65.77, overall=65.77 ]	(390.93634, 2195.4207)(425.2242, 202297.44)(426.22653, 30333.592)(424.2215, 8545.41)(408.21524, 322.88)(431.18036, 86559.26)(432.18512, 30386.059)(413.172, 166883.31)(414.1744, 23521.03)
8-alpha-((4-Acetoxy-5-hydroxy)-angelate))salonitenolide	Sesquiterpene lactones	1627154	1640949	1436995	1440648	1311022	1272515		1676923	1684962	1649171	1679793	1307619	1273653		8-alpha-((4-Acetoxy-5-hydroxy)-angelate))salonitenolide [ C15 H20 O4, tgt=60.82, overall=60.82 ]	(247.12675, 49186.812)(248.1299, 3945.8254)(267.15207, 631.1909)
Ursiniolide-B	Sesquiterpene lactones	566556	1	1	2487465	1794553	1837113		1	782888	1654037	1598917	1	1		Ursiniolide-B [ C24 H32 O9, tgt=43.08, overall=43.08 ]	(449.32825, 2357.2676)(449.70898, 825.27496)(448.63773, 4195.3774)(449.21118, 929.0925)(451.2066, 4762.3506)(452.20978, 797.29504)(473.74966, 10468.77)(475.09283, 3581.2966)
geraniina	Sesquiterpene lactones	387932	387103	361034	409189	338326	346721		323692	332404	320198	305778	347530	346154		geraniina [ C41 H28 O27, tgt=13.69, overall=13.69 ]	(957.0489, 17763.28)(958.0508, 2988.3606)
canferolo	Sesquiterpene lactones	485803	470225	976501	1562745	452076	446058		963629	1	599412	553709	409977	386023		canferolo [ C15 H10 O6, tgt=47.62, overall=47.62 ]	(287.0503, 28031.03)(288.05316, 2219.0864)(271.6464, 6691.9165)(273.0479, 1592.4825)(307.98282, 1422.5189)(286.06775, 1529.6199)(293.03058, 349.905)
Ivalbatin	Sesquiterpene lactones	1627154	1640949	1436995	1440648	1311022	1272515		1676923	1684962	1649171	1679793	1307619	1273653		Ivalbatin [ C15 H20 O4, tgt=60.82, overall=60.82 ]	(247.12675, 49186.812)(248.1299, 3945.8254)(267.15207, 631.1909)
Eleganin	Sesquiterpene lactones	6066646	1	5721257	5703977	6373394	6147552		1498575	859455	32449458	685707	6169894	5939951		Eleganin [ C22 H26 O9, tgt=57.00, overall=57.00 ]	(436.66733, 4071.6213)(436.1592, 390.05)(419.35733, 4611.554)(420.1631, 1486.16)(437.17047, 4748.731)(438.1733, 645.18835)(439.1819, 9612.205)(418.93823, 21520.178)(420.4444, 5526.859)(422.16272, 1656.0599)(453.2008, 15652.37)(454.204, 812.96)(457.43423, 10428.966)(458.81436, 2387.2698)(459.15503, 320.46)(441.67337, 17479.752)(441.81372, 3706.1433)(443.14612, 4011.7415)
Eupatocunin	Sesquiterpene lactones	41648296	42970856	6103092	6369809	47587944	47269204		10175402	10321129	14406939	14350165	47704300	47094016		Eupatocunin [ C22 H28 O7, tgt=65.77, overall=65.77 ]	(390.93634, 2195.4207)(425.2242, 202297.44)(426.22653, 30333.592)(424.2215, 8545.41)(408.21524, 322.88)(431.18036, 86559.26)(432.18512, 30386.059)(413.172, 166883.31)(414.1744, 23521.03)
Vernomygdin	Sesquiterpene lactones	3478753	3441736	1	6034033	6777918	6895146		10505173	10305906	21014784	13950425	9834935	8995127		Vernomygdin [ C19 H20 O7, tgt=65.72, overall=65.72 ]	(343.11368, 97197.84)(344.1164, 21948.52)(345.1202, 20801.752)(362.38626, 1071.41)(360.14368, 17282.41)(361.1356, 8168.4756)(362.1361, 2454.42)(387.1216, 208.11002)(366.3203, 265293.12)(366.10275, 36762.984)(367.1025, 7069.443)
2alpha,3beta,4alpha-trihydroxy-4beta-(acetoxymethyl)-8alpha(4-methacrylate)-1alphaH,5alphaH,6betaH,7alphaH-guai-10(14),11(13)-dien-6,12-olide	Sesquiterpene lactones	619531	638439	991360	1125661	1817948	1708670		1700854	1115712	2457401	3152854	1706290	1661526		2alpha,3beta,4alpha-trihydroxy-4beta-(acetoxymethyl)-8alpha(4-methacrylate)-1alphaH,5alphaH,6betaH,7alphaH-guai-10(14),11(13)-dien-6,12-olide [ C21 H26 O9, tgt=77.22, overall=77.22 ]	(423.28897, 5338.3853)(426.17062, 801.1501)(404.61267, 4691.7646)(405.14258, 1811.5901)(406.1326, 276.115)(425.17114, 266990.03)(426.1738, 53041.37)(427.9316, 23006.758)(406.32666, 8211.719)(440.64795, 3524.5037)(446.14825, 5286.7856)(447.6525, 1229.7267)(449.1604, 214.58)(431.14606, 1974.7772)
Linichlorina?A	Sesquiterpene lactones	2698761	2660993	3876954	1716613	1644696	1409529		5333918	5331865	8626548	8384055	1565340	1485337		Linichlorina?A [ C19 H23 Cl O6, tgt=53.79, overall=53.79 ]	(382.83502, 12896.581)(384.12036, 58480.496)(387.11902, 9822.444)(366.27548, 12770.333)(368.35907, 21840.242)(370.44827, 41059.78)(383.12372, 14551.182)(384.12668, 479.81598)(370.72424, 25600.525)(371.45956, 3721.0764)(402.99634, 216626.84)(403.975, 67253.45)(403.5851, 14562.422)(404.158, 884.14)(384.3404, 63385.29)(386.14307, 9621.296)(387.14328, 13731.952)(409.11688, 2795.1)(411.62015, 516.9049…
acidoidrossicinnamico	Sesquiterpene lactones	352295	169298	169223	172479	310809	290707		397432	372291	915368	412100	253363	306341		acidoidrossicinnamico [ C9 H10 O2, tgt=47.35, overall=47.35 ]	(133.05861, 4010.656)(152.36455, 4864.961)(136.14383, 26789.342)(137.07619, 2113.394)(171.10971, 1082.6571)(177.06699, 1687.9231)(158.05489, 711.8351)
Erioflorin acetate	Sesquiterpene lactones	4258666	4018821	5108225	5356139	60552864	60099024		6746246	6763166	11318436	11453051	6065344	64313920		Erioflorin acetate [ C21 H26 O7, tgt=62.17, overall=62.17 ]	(390.16858, 2189.615)(393.1825, 143223.22)(394.18524, 23129.934)(377.172, 19658.434)(378.1735, 468.73)(393.2027, 18653.553)(394.2057, 2367.702)(395.2067, 123.58)(417.16412, 4899.2085)(418.16858, 761.14)(399.1566, 157023.72)(400.1592, 20631.941)
Grossheimin	Sesquiterpene lactones	812789	756726	983110	1016447	563308	541785		1619750	1595476	6492910	6358180	497143	494158		Grossheimin [ C15 H18 O4, tgt=94.31, overall=94.31 ]	(264.62653, 691.69995)(263.12778, 15684.95)(264.1316, 2970.9448)(247.12457, 4088.9453)(289.12115, 66635.98)(290.12405, 5166.688)(268.32346, 2421212.2)(269.10358, 391250.47)(270.10522, 46583.24)(271.1071, 2486.6184)
1-Caffeoylquinic acid	Sesquiterpene lactones	2603289	2720658	4339491	4278005	3466208	3413051		7039600	7045256	10541620	10252430	3369569	3318526		1-Caffeoylquinic acid [ C16 H18 O9, tgt=71.30, overall=71.30 ]	(355.49554, 71693.13)(356.4513, 10183.9375)(357.39194, 6604.039)(359.1084, 47705.266)(337.08405, 42246.82)(338.08746, 3946.986)(339.7606, 1498.14)(357.10922, 8975.89)(338.87628, 23362.553)(339.8125, 4081.9612)(372.12836, 29631.25)(354.1176, 922.17596)(380.09067, 754.4634)(361.4131, 4945.323)(361.083, 5009.95)(362.082, 6567.68)(363.0867, 339.92)
19-desoxy-15-chlorojanerin	Sesquiterpene lactones	2698761	2660993	3876954	1716613	1644696	1409529		5333918	5331865	8626548	8384055	1565340	1485337		19-desoxy-15-chlorojanerin [ C19 H23 Cl O6, tgt=53.79, overall=53.79 ]	(382.83502, 12896.581)(384.12036, 58480.496)(387.11902, 9822.444)(366.27548, 12770.333)(368.35907, 21840.242)(370.44827, 41059.78)(383.12372, 14551.182)(384.12668, 479.81598)(370.72424, 25600.525)(371.45956, 3721.0764)(402.99634, 216626.84)(403.975, 67253.45)(403.5851, 14562.422)(404.158, 884.14)(384.3404, 63385.29)(386.14307, 9621.296)(387.14328, 13731.952)(409.11688, 2795.1)(411.62015, 516.9049…
Xanthumin	Sesquiterpene lactones	6759247	933076	11756506	7444110	337279	1		2214833	4125411	14369012	445907	3861622	2753173		Xanthumin [ C17 H22 O5, tgt=61.64, overall=61.64 ]	(288.1389, 1259.215)(308.82684, 1826.8932)(289.1466, 2690.4568)(306.171, 19652.05)(333.1458, 9619.39)(334.1475, 773.73)(315.1361, 60999.402)(316.13907, 6766.952)
siringina	Sesquiterpene lactones	7302423	7478301	26626968	26411648	8785294	9359053		26073704	22708808	32868142	3426360	6377317	8539646		siringina [ C17 H24 O9, tgt=64.27, overall=64.27 ]	(373.57214, 72840.34)(374.37634, 12242.86)(375.15323, 15958.142)(355.1309, 286884.88)(356.13385, 45507.742)(375.15585, 28288.67)(376.1594, 2529.577)(357.1466, 441540.28)(358.14944, 59066.61)(359.15405, 1087.7051)(391.982, 5904.9814)(391.1724, 3363.0876)(372.27026, 27667.484)(374.1753, 8075.84)(396.927, 205219.25)(397.53784, 67331.82)(379.13025, 18281.496)(380.133, 1962.565)
solstitialin	Sesquiterpene lactones	278033	253000	507513	423101	255049	247417		1257298	1242682	5059106	4943867	243828	302304		solstitialin [ C15 H20 O5, tgt=68.94, overall=68.94 ]	(280.73242, 5089.9614)(263.12155, 56577.582)(264.12448, 4865.048)(283.1456, 236.28)(263.12778, 19793.23)(264.1316, 3768.29)(289.1212, 107936.484)(290.12436, 11072.636)
crepiside C	Sesquiterpene lactones	1877847	1	5283522	5047406	3362182	3761130		8947982	9143697	9461109	11016090	3395591	3734832		crepiside C [ C21 H28 O9, tgt=73.20, overall=73.20 ]	(425.57343, 144254.6)(426.64908, 30377.496)(427.4354, 66297.125)(428.18753, 12583.009)(406.41605, 12144.53)(407.17157, 2357.1348)(427.1872, 323327.34)(428.19028, 54081.32)(429.19717, 22321.148)(430.19763, 987.87)(408.98587, 222091.42)(410.1798, 45312.8)(442.20453, 4211.25)(425.20444, 996.59393)(447.1622, 3498.348)(433.15945, 918.95996)
8alpha-O-(4,5-diacetoxyangeloyl)sonchucarpolide	Sesquiterpene lactones	955250	697322	3939041	3505231	1018648	1579371		1256942	1125553	2870139	2257477	1130523	1123002		8alpha-O-(4,5-diacetoxyangeloyl)sonchucarpolide [ C24 H30 O8, tgt=48.90, overall=48.90 ]	(451.2058, 3586.4314)(452.20966, 1287.6201)(430.85742, 12700.313)(434.1991, 1854.08)(448.87537, 1996.269)(449.2097, 938.69)(451.2069, 6818.22)(452.2095, 229.81)(433.9687, 5814.649)(433.6994, 30176.02)(434.201, 7647.97)(435.201, 1137.46)(468.23477, 932.14667)(473.72607, 12226.819)(474.5957, 4146.5283)(455.18002, 37776.777)(456.4029, 8871.075)(457.19562, 35231.246)
Elephantopin	Sesquiterpene lactones	3478753	3441736	1	6034033	6777918	6895146		10505173	10305906	21014784	13950425	9834935	8995127		Elephantopin [ C19 H20 O7, tgt=65.72, overall=65.72 ]	(343.11368, 97197.84)(344.1164, 21948.52)(345.1202, 20801.752)(362.38626, 1071.41)(360.14368, 17282.41)(361.1356, 8168.4756)(362.1361, 2454.42)(387.1216, 208.11002)(366.3203, 265293.12)(366.10275, 36762.984)(367.1025, 7069.443)
alpha-Santonin	Sesquiterpene lactones	1627154	1640949	197975	201745	215160	216003		1676923	1684962	1649171	1679793	213048	201372		alpha-Santonin [ C15 H18 O3, tgt=60.82, overall=60.82 ]	(247.12677, 51519.13)(248.12996, 4187.466)(229.11864, 15763.56)(230.12354, 1271.705)(249.14148, 4197.325)(251.14403, 4489.4463)(266.1686, 2539.74)
chlororepdiolide	Sesquiterpene lactones	1000352	282956	1007657	1752628	845727	843106		2238945	2221568	2958325	2863286	815550	1277701		chlororepdiolide [ C19 H23 Cl O7, tgt=55.62, overall=55.62 ]	(399.78647, 1262.5083)(380.46472, 2510.3538)(381.1047, 2063.92)(401.90237, 16107.451)(401.62692, 4987.85)(401.1185, 6728.19)(381.1093, 29513.143)(382.11203, 3366.4897)(383.10675, 1900.49)(417.62576, 2433.602)(399.3744, 26142.584)(401.63928, 1946.803)(403.1425, 2043.29)(427.1128, 2562.18)(406.09845, 12261.556)(405.29785, 826.988)
Molephantin	Sesquiterpene lactones	15548034	15434876	12159829	12046629	18688950	14178211		21926798	14771271	30469404	25315994	13918347	13465924		Molephantin [ C19 H22 O6, tgt=72.72, overall=72.72 ]	(373.13974, 149952.75)(374.14258, 16693.352)(333.1453, 766.86005)(347.1483, 3180.923)(369.1836, 153.43)(347.15222, 7426.9536)(355.13034, 226194.64)(356.1339, 40285.69)(349.1773, 23166.271)(350.1805, 2135.697)(351.1823, 740.4)
17,18-desoxyrepin	Sesquiterpene lactones	15548034	15434876	12159829	12046629	18688950	14178211		21926798	14771271	30469404	25315994	13918347	13465924		17,18-desoxyrepin [ C19 H22 O6, tgt=72.72, overall=72.72 ]	(373.13974, 149952.75)(374.14258, 16693.352)(333.1453, 766.86005)(347.1483, 3180.923)(369.1836, 153.43)(347.15222, 7426.9536)(355.13034, 226194.64)(356.1339, 40285.69)(349.1773, 23166.271)(350.1805, 2135.697)(351.1823, 740.4)
acidoclorogenico	Sesquiterpene lactones	2603289	2720658	4339491	4278005	3466208	3413051		7039600	7045256	10541620	10252430	3369569	3318526		acidoclorogenico [ C16 H18 O9, tgt=71.30, overall=71.30 ]	(355.49554, 71693.13)(356.4513, 10183.9375)(357.39194, 6604.039)(359.1084, 47705.266)(337.08405, 42246.82)(338.08746, 3946.986)(339.7606, 1498.14)(357.10922, 8975.89)(338.87628, 23362.553)(339.8125, 4081.9612)(372.12836, 29631.25)(354.1176, 922.17596)(380.09067, 754.4634)(361.4131, 4945.323)(361.083, 5009.95)(362.082, 6567.68)(363.0867, 339.92)
8alpha-isovaleryloxyzaluzanin C	Sesquiterpene lactones	287834	959403	706038	1144574	1092716	1122347		271538	109988	675914	659561	1077062	1072034		8alpha-isovaleryloxyzaluzanin C [ C20 H26 O5, tgt=55.41, overall=55.41 ]	(348.27347, 9067.437)(348.18008, 438.91202)(329.16772, 10849.776)(330.1697, 670.44)(349.3031, 4394.8877)(350.19656, 2506.355)(331.1831, 9362.916)(332.1852, 922.8733)(350.2112, 1306.56)(372.31888, 54694.223)(373.84497, 8961.978)(354.41467, 28883.605)(355.91913, 615431.8)(356.1713, 387678.28)
8-desacylcynaropicrin	Sesquiterpene lactones	812789	756726	983110	1016447	563308	541785		1619750	1595476	6492910	6358180	497143	494158		8-desacylcynaropicrin [ C15 H18 O4, tgt=94.31, overall=94.31 ]	(264.62653, 691.69995)(263.12778, 15684.95)(264.1316, 2970.9448)(247.12457, 4088.9453)(289.12115, 66635.98)(290.12405, 5166.688)(268.32346, 2421212.2)(269.10358, 391250.47)(270.10522, 46583.24)(271.1071, 2486.6184)
athoin	Sesquiterpene lactones	1154055	1614651	1182099	2555529	1250517	1667678		2663786	2621342	2862447	3533202	1987183	1888372		athoin [ C19 H26 O8, tgt=63.45, overall=63.45 ]	(383.41132, 13623.672)(384.16434, 998.51135)(365.15045, 2067.464)(366.35614, 282.41803)(367.1655, 1130.95)(385.17664, 44466.94)(386.17947, 4809.1074)(367.16586, 3937.3047)(400.1948, 426.80997)(382.1836, 134.37)(407.16064, 4213.67)(408.16315, 664.78)(387.44647, 19942.408)(388.14398, 1795.3229)(389.13016, 1874.86)
Phantomolin	Sesquiterpene lactones	20340500	20843434	10718809	11095698	25924526	11767183		5268969	5208607	10489994	10217544	23125268	23695614		Phantomolin [ C21 H26 O6, tgt=47.41, overall=47.41 ]	(361.17563, 23888.646)(375.18286, 146622.58)(376.18454, 10655.109)(362.09177, 11517.632)(362.1793, 8916.42)(374.19473, 2240.16)(401.1711, 45341.56)(402.17404, 5659.4653)(381.05606, 95811.78)(381.7464, 12250.519)(381.15576, 3208.0469)
costunolide	Sesquiterpene lactones	1	360681	1	1	1	1		1	1	208779	1	716963	724902		costunolide [ C15H20O2, tgt= ]	(233.14917, 1269.4489)(255.13629, 227.38501)(241.13724, 2347.7244)
Cichorioside?C	Sesquiterpene lactones	949482	24858644	2912171	35623608	21962924	21800160		44073896	43549780	19476242	17637072	21398274	21034322		Cichorioside?C [ C21 H32 O9, tgt=60.51, overall=60.51 ]	(429.98508, 23636.037)(430.20468, 4700.792)(431.21432, 1458.6699)(411.19278, 830105.7)(412.1959, 152371.4)(413.41592, 34399.434)(414.20584, 5011.8115)(431.2167, 1429.21)(413.20667, 61993.41)(414.21, 8557.818)(415.2138, 1199.49)(430.23553, 4463.8823)(431.23682, 1151.61)(453.20053, 6780.181)(454.20386, 1432.405)(433.47318, 3540.404)
leptocarpin	Sesquiterpene lactones	493451	494695	866483	850248	1298055	620814		1720089	1713996	3915244	3766432	1137890	1258516		leptocarpin [ C20 H26 O6, tgt=68.33, overall=68.33 ]	(363.17447, 543.252)(347.63358, 4355.796)(345.1662, 2480.59)(348.17624, 15592.828)(350.18042, 2144.82)(384.21616, 1664.965)(385.2171, 332.608)(366.20566, 649.4175)(389.17062, 15008.605)(390.1746, 2836.4814)(371.16165, 324070.34)(372.16464, 46325.52)
Methyl 6alpha,8alpha,15-trihydroxyelema-1,3,11(13)-trien-12-oate	Sesquiterpene lactones	41753316	40127196	43772176	43459804	43220640	42920224		41135512	41555664	35500808	35437220	46367500	45292844		Methyl 6alpha,8alpha,15-trihydroxyelema-1,3,11(13)-trien-12-oate [ C16 H24 O5, tgt=82.07, overall=82.07 ]	(279.15512, 67749.01)(280.158, 8703.78)(314.4955, 2543.272)(301.13718, 1781716.9)(302.14044, 276872.56)(303.14233, 23627.535)(299.19437, 776.5533)
Guai-8-enolide	Sesquiterpene lactones	3196328	3234412	6118424	6072121	6410947	6439593		9440571	5101477	8977225	8625100	3647935	3447884		Guai-8-enolide [ C21 H30 O9, tgt=91.22, overall=91.22 ]	(427.5873, 28740.45)(428.59454, 22555.29)(429.60263, 15265.317)(430.20444, 2104.9968)(408.5477, 61219.875)(410.05435, 20066.148)(411.19196, 53941.46)(412.19458, 8186.0234)(429.20084, 29714.861)(430.20422, 3973.1687)(431.21173, 2085.974)(411.19244, 638108.2)(412.19568, 127365.59)(413.1963, 31749.025)(414.1984, 2449.4978)(449.1787, 1205.645)(433.3729, 4176.414)(435.1742, 276.09)
salograviolide B	Sesquiterpene lactones	6101877	6004349	10270677	41278036	39813112	42299936		11673916	43877712	99728464	98181376	41867916	39379856		salograviolide B [ C17 H20 O6, tgt=77.33, overall=77.33 ]	(322.13156, 2074.89)(341.8834, 3309.5894)(324.15588, 824.645)(346.791, 48114.703)(347.74683, 5017.1006)(329.11572, 230827.86)(330.11865, 26834.408)
Chinensiolide C	Sesquiterpene lactones	812789	756726	983110	1016447	563308	541785		1619750	1595476	6492910	6358180	497143	494158		Chinensiolide C [ C15 H18 O4, tgt=94.31, overall=94.31 ]	(264.62653, 691.69995)(263.12778, 15684.95)(264.1316, 2970.9448)(247.12457, 4088.9453)(289.12115, 66635.98)(290.12405, 5166.688)(268.32346, 2421212.2)(269.10358, 391250.47)(270.10522, 46583.24)(271.1071, 2486.6184)
4beta,15-dihydro-3-dehydrosolstitialin A	Sesquiterpene lactones	278033	253000	507513	423101	255049	247417		1257298	1242682	5059106	4943867	243828	302304		4beta,15-dihydro-3-dehydrosolstitialin A [ C15 H20 O5, tgt=68.94, overall=68.94 ]	(280.73242, 5089.9614)(263.12155, 56577.582)(264.12448, 4865.048)(283.1456, 236.28)(263.12778, 19793.23)(264.1316, 3768.29)(289.1212, 107936.484)(290.12436, 11072.636)
lactuside C	Sesquiterpene lactones	1877847	1	5283522	5047406	3362182	3761130		8947982	9143697	9461109	11016090	3395591	3734832		lactuside C [ C21 H28 O9, tgt=73.20, overall=73.20 ]	(425.57343, 144254.6)(426.64908, 30377.496)(427.4354, 66297.125)(428.18753, 12583.009)(406.41605, 12144.53)(407.17157, 2357.1348)(427.1872, 323327.34)(428.19028, 54081.32)(429.19717, 22321.148)(430.19763, 987.87)(408.98587, 222091.42)(410.1798, 45312.8)(442.20453, 4211.25)(425.20444, 996.59393)(447.1622, 3498.348)(433.15945, 918.95996)
8alpha-O-(4-Hydroxy-2-methylenebutanoyloxy)-11beta,13-dihydrosonchucarpolide	Sesquiterpene lactones	1	1	1	1	3517609	1		1320680	1	1438150	1444418	1	1		8alpha-O-(4-Hydroxy-2-methylenebutanoyloxy)-11beta,13-dihydrosonchucarpolide [ C20H28O7, tgt= ]	(381.18484, 27521.041)(382.19125, 5342.115)(367.18195, 733.33496)(384.2007, 5787.14)(385.1987, 1129.11)(366.52402, 1060.3301)(398.2172, 68480.34)(399.2176, 8181.28)(384.01523, 3295.282)(385.01688, 523.967)(404.0057, 567.11163)(389.17172, 40438.96)(390.17456, 5113.3525)
9alpha-Acetoxycumambrin B	Sesquiterpene lactones	10503505	10809947	2013618	2002017	19936498	17735252		1	1	4928295	4772589	1	1		9alpha-Acetoxycumambrin B [ C17 H22 O6, tgt=53.48, overall=53.48 ]	(304.13434, 21858.678)(305.14755, 3504.47)(349.14047, 19981.402)(350.14304, 1364.7716)(330.20538, 122630.305)(331.20764, 11623.424)
acidotarassico	Sesquiterpene lactones	812789	756726	983110	1016447	563308	541785		1619750	1595476	6492910	6358180	497143	494158		acidotarassico [ C15 H18 O4, tgt=94.31, overall=94.31 ]	(264.62653, 691.69995)(263.12778, 15684.95)(264.1316, 2970.9448)(247.12457, 4088.9453)(289.12115, 66635.98)(290.12405, 5166.688)(268.32346, 2421212.2)(269.10358, 391250.47)(270.10522, 46583.24)(271.1071, 2486.6184)
Macrocliniside?A	Sesquiterpene lactones	1877847	1	5283522	5047406	3362182	3761130		8947982	9143697	9461109	11016090	3395591	3734832		Macrocliniside?A [ C21 H28 O9, tgt=73.20, overall=73.20 ]	(425.57343, 144254.6)(426.64908, 30377.496)(427.4354, 66297.125)(428.18753, 12583.009)(406.41605, 12144.53)(407.17157, 2357.1348)(427.1872, 323327.34)(428.19028, 54081.32)(429.19717, 22321.148)(430.19763, 987.87)(408.98587, 222091.42)(410.1798, 45312.8)(442.20453, 4211.25)(425.20444, 996.59393)(447.1622, 3498.348)(433.15945, 918.95996)
Mexicanine E	Sesquiterpene lactones	2686824	2505969	1	224803	436546	417213		697053	347798	439669	250280	603929	552254		Mexicanine E [ C14 H16 O3, tgt=57.18, overall=57.18 ]	(232.94414, 575.75494)(233.1094, 189.34)(215.10081, 10944.6875)(216.10376, 395.13)(217.11551, 187102.88)(218.11612, 15482.755)(235.47363, 493.15164)(257.77182, 39787.61)(258.10776, 7782.0034)
Scabiolide	Sesquiterpene lactones	3543083	3695290	6495258	6708791	3940172	3971223		7587807	7962939	12192337	11574779	4122385	3856417		Scabiolide [ C21 H28 O8, tgt=91.22, overall=91.22 ]	(408.68002, 86010.195)(410.18002, 25802.666)(411.19217, 132304.34)(412.1948, 12094.84)(411.19287, 793131.5)(412.19608, 149314.9)(413.3634, 26964.592)(414.1985, 2175.644)(431.1666, 1256.422)(432.1828, 148.8)(417.16415, 10068.996)(418.16855, 913.00336)
Artemissifolin	Sesquiterpene lactones	1627154	1640949	1436995	1440648	1311022	1272515		1	1	1649171	1679793	1	1		Artemissifolin [ C15 H20 O4, tgt=60.82, overall=60.82 ]	(247.12665, 50573.91)(248.12982, 4110.876)(267.152, 573.85876)
Solstitialin A-3, 13 diacetate	Sesquiterpene lactones	2019253	2147767	8589866	2340806	2140208	2152296		2167944	2333429	5676533	4686333	2160163	2152628		Solstitialin A-3, 13 diacetate [ C19 H24 O7, tgt=63.20, overall=63.20 ]	(366.15833, 781.64)(346.1448, 4342.35)(370.168, 20949.81)(347.1516, 12482.878)(348.15332, 685.86)(390.84225, 57321.04)(392.15463, 10248.345)(372.6398, 145609.67)(373.64047, 16671.213)
Ligulatin-B	Sesquiterpene lactones	6759247	933076	11756506	7444110	337279	1		2214833	4125411	14369012	445907	3861622	2753173		Ligulatin-B [ C17 H22 O5, tgt=61.64, overall=61.64 ]	(288.1389, 1259.215)(308.82684, 1826.8932)(289.1466, 2690.4568)(306.171, 19652.05)(333.1458, 9619.39)(334.1475, 773.73)(315.1361, 60999.402)(316.13907, 6766.952)
linichlorin B	Sesquiterpene lactones	2698761	2660993	3876954	1716613	1644696	1409529		5333918	5331865	8626548	8384055	1565340	1485337		linichlorin B [ C19 H23 Cl O6, tgt=53.79, overall=53.79 ]	(382.83502, 12896.581)(384.12036, 58480.496)(387.11902, 9822.444)(366.27548, 12770.333)(368.35907, 21840.242)(370.44827, 41059.78)(383.12372, 14551.182)(384.12668, 479.81598)(370.72424, 25600.525)(371.45956, 3721.0764)(402.99634, 216626.84)(403.975, 67253.45)(403.5851, 14562.422)(404.158, 884.14)(384.3404, 63385.29)(386.14307, 9621.296)(387.14328, 13731.952)(409.11688, 2795.1)(411.62015, 516.9049…
naphthalene-1,8-diol	Sesquiterpene lactones	145024	1	292430	148388	140354	292042		178335	160059	656100	643686	300122	284543		naphthalene-1,8-diol [ C10 H8 O2, tgt=76.16, overall=76.16 ]	(160.05367, 4827.053)(164.06836, 2640.42)(145.99525, 63904.133)(147.0609, 5037.74)(162.60863, 73929.86)(163.55573, 4856.197)(169.0446, 6345.635)
janerin	Sesquiterpene lactones	2424045	2443534	22981264	22481920	4491980	4445001		23577224	23411956	50181396	49057204	4425037	4235649		janerin [ C19 H22 O7, tgt=68.43, overall=68.43 ]	(349.14026, 8314.728)(389.13525, 13704.298)(371.12576, 231010.7)(372.12817, 27283.547)
Xerantholide	Sesquiterpene lactones	1627154	1640949	197975	201745	215160	216003		1676923	1684962	1649171	1679793	213048	201372		Xerantholide [ C15 H18 O3, tgt=60.82, overall=60.82 ]	(247.12677, 51519.13)(248.12996, 4187.466)(229.11864, 15763.56)(230.12354, 1271.705)(249.14148, 4197.325)(251.14403, 4489.4463)(266.1686, 2539.74)
Artecanin	Sesquiterpene lactones	2474850	2601097	2487343	2552055	2620142	2634943		2974942	2970655	2438943	2588978	2679689	2639392		Artecanin [ C15 H18 O5, tgt=59.37, overall=59.37 ]	(279.11578, 590.3326)(261.10602, 69989.39)(262.10892, 5772.685)(281.1316, 9320.71)(282.13474, 1335.2084)(263.12057, 614.5214)
Arnicolide-A	Sesquiterpene lactones	6759247	933076	11756506	7444110	337279	1		2214833	4125411	14369012	445907	3861622	2753173		Arnicolide-A [ C17 H22 O5, tgt=61.64, overall=61.64 ]	(288.1389, 1259.215)(308.82684, 1826.8932)(289.1466, 2690.4568)(306.171, 19652.05)(333.1458, 9619.39)(334.1475, 773.73)(315.1361, 60999.402)(316.13907, 6766.952)
Calaxin	Sesquiterpene lactones	13323974	13652693	21995278	21514114	3428700	3409087		22900376	22845616	49153692	43763328	3407311	3270416		Calaxin [ C19 H20 O6, tgt=68.16, overall=68.16 ]	(349.13953, 4989.7163)(327.78644, 107195.0)(327.12323, 30330.613)(328.1207, 3776.1448)(350.1433, 455.77)(331.13013, 32706.424)(332.13245, 4648.9497)(346.9701, 14549.079)(347.1544, 14455.864)(371.1257, 169797.02)(372.1282, 19753.17)(353.11444, 16489.271)(354.11768, 3303.5935)
repdiolide triol	Sesquiterpene lactones	2019253	2147767	8589866	2340806	2140208	2152296		2167944	2333429	5676533	4686333	2160163	2152628		repdiolide triol [ C19 H24 O7, tgt=63.20, overall=63.20 ]	(366.15833, 781.64)(346.1448, 4342.35)(370.168, 20949.81)(347.1516, 12482.878)(348.15332, 685.86)(390.84225, 57321.04)(392.15463, 10248.345)(372.6398, 145609.67)(373.64047, 16671.213)
acidocicorico	Sesquiterpene lactones	1	1	123549	120840	1	679404		82470	106412	100477	94335	1	1		acidocicorico [ C22 H18 O12, tgt= ]	(478.0966, 992.98)(457.0666, 35344.48)(458.06934, 4853.003)(459.07172, 823.98)(478.0971, 728.365)(458.41312, 3966.498)(475.1134, 2071.37)(501.08252, 3913.27)(480.06366, 858.2721)
methyl 8alpha(3,4-dihydroxy-2-methylenebutanoyloxy)-6beta,15-dihydroxyelema-1,3,11(13)-trien-12-oate	Sesquiterpene lactones	1625177	948141	2824105	2841410	2109809	2116408		3815953	3794166	8159148	7913296	2069777	2030227		methyl 8alpha(3,4-dihydroxy-2-methylenebutanoyloxy)-6beta,15-dihydroxyelema-1,3,11(13)-trien-12-oate [ C21 H31 O8, tgt=51.76, overall=51.76 ]	(413.2065, 46689.047)(414.2097, 7198.994)(415.21814, 5010.025)(395.36243, 12378.999)(396.2013, 10537.75)(413.20743, 53707.28)(414.21048, 6826.8247)(415.2233, 39785.156)(416.2262, 7870.773)(397.2121, 4268.9)(429.98563, 26297.812)(430.80902, 7615.3794)(431.2335, 2579.05)(434.63757, 10537.83)(435.20255, 5380.145)
8alpha-acetoxyzaluzanin C	Sesquiterpene lactones	2162344	2681356	4797453	4866211	4993444	2227890		3421568	3354664	8627032	8364899	2752637	3321249		8alpha-acetoxyzaluzanin C [ C17 H20 O7, tgt=60.21, overall=60.21 ]	(319.86322, 1819.7688)(337.13013, 3201.94)(338.13824, 962.97003)(356.16394, 736.28)(360.77808, 7571.224)(360.1171, 2319.5166)(345.11014, 33094.215)(346.1126, 3064.1008)
(5R,6R,7R,8S,10S)-14-Hydroxy-8-(2'-[alpha-hydroxy,beta-acetoxyethyl]-acryloxy)-elema-l,3-dien-6,12-olide	Sesquiterpene lactones	18740056	18558220	31810936	4973575	25921776	3484765		4974747	4871877	5319012	6254609	26179346	3473389		(5R,6R,7R,8S,10S)-14-Hydroxy-8-(2'-[alpha-hydroxy,beta-acetoxyethyl]-acryloxy)-elema-l,3-dien-6,12-olide [ C22 H28 O8, tgt=43.87, overall=43.87 ]	(420.17682, 6616.9526)(421.17334, 1484.5782)(402.1726, 4082.9302)(404.84644, 1770.23)(446.7129, 8912.637)(448.17722, 1305.7001)(427.99673, 174304.97)(428.99905, 24505.08)
Peonidin 3-O-(6''-malonyl-glucoside)	Sesquiterpene lactones	1	1	1	1	1	1		1	1	141112	131554	1	1		Peonidin 3-O-(6''-malonyl-glucoside) [ C25 H25 O14, tgt= ]	(533.1156, 71375.39)(534.1176, 9750.928)(551.15625, 11254.01)(552.15894, 1012.265)
guaianolide	Sesquiterpene lactones	5658717	795753	4795744	11310311	8400958	8418520		4577731	4727423	21268270	21020974	8455019	8138828		guaianolide [ C20 H24 O7, tgt=58.19, overall=58.19 ]	(362.90527, 5373.2373)(363.1564, 9075.68)(402.39685, 107173.875)(403.1529, 78646.97)(403.156, 18367.01)(404.1578, 620.28)(394.43777, 81451.94)(395.19165, 24225.775)(396.19815, 1469.156)(379.1656, 2262.47)(385.1405, 82104.125)(386.14322, 9989.938)
dendroserin	Sesquiterpene lactones	100623	88901	291923	85193	795536	847511		350701	460812	363859	362078	847289	823371		dendroserin [ C15 H24 O4, tgt=54.92, overall=54.92 ]	(270.31415, 13799.759)(270.1711, 466.7622)(251.82697, 18214.156)(252.16093, 905.98676)(271.18396, 112885.56)(272.18668, 11190.846)(291.1557, 1226.942)
Lipiferolide	Sesquiterpene lactones	6759247	933076	11756506	7444110	337279	1		2214833	4125411	14369012	445907	3861622	2753173		Lipiferolide [ C17 H22 O5, tgt=61.64, overall=61.64 ]	(288.1389, 1259.215)(308.82684, 1826.8932)(289.1466, 2690.4568)(306.171, 19652.05)(333.1458, 9619.39)(334.1475, 773.73)(315.1361, 60999.402)(316.13907, 6766.952)
scorzoside	Sesquiterpene lactones	1216717	24964810	7901237	7764548	10250425	10063752		4722007	4719923	17367796	16886536	10731022	10238765		scorzoside [ C21 H30 O8, tgt=60.51, overall=60.51 ]	(412.06424, 135992.48)(413.20187, 30624.139)(413.34833, 27049.307)(414.20453, 2921.8452)(393.5017, 121787.13)(394.1855, 37448.35)(395.19183, 12251.199)(413.20764, 62296.016)(414.2103, 8509.6455)(415.2179, 2959.96)(395.19818, 560098.1)(396.20135, 110512.336)(397.20337, 16621.703)(398.20505, 1891.36)(428.7262, 2270.75)(431.2382, 1133.64)(414.22556, 3579.875)(434.52005, 3303.7634)(419.18262, 115113.…
4beta,15-dihydro-3-dehydro solstitialin A	Sesquiterpene lactones	278033	253000	507513	423101	255049	247417		1257298	1242682	5059106	4943867	243828	302304		4beta,15-dihydro-3-dehydro solstitialin A [ C15 H20 O5, tgt=68.94, overall=68.94 ]	(280.73242, 5089.9614)(263.12155, 56577.582)(264.12448, 4865.048)(283.1456, 236.28)(263.12778, 19793.23)(264.1316, 3768.29)(289.1212, 107936.484)(290.12436, 11072.636)
matricarin	Sesquiterpene lactones	448995	434627	71225360	604911	684590	680560		420710	427897	2323774	17553156	665741	631896		matricarin [ C17 H20 O5, tgt=53.53, overall=53.53 ]	(304.13425, 22361.594)(305.1459, 4325.72)(287.13126, 2083.644)(307.16333, 3955.3823)(330.08603, 36999.74)(330.73975, 4718.075)(312.61887, 867.73376)
beta-cyclocostunolide	Sesquiterpene lactones	3941069	360681	1396210	1374523	1314454	1231967		1124654	1121931	208779	690404	716963	724902		beta-cyclocostunolide [ C15 H20 O2, tgt=75.31, overall=75.31 ]	(233.14824, 40027.598)(234.14937, 8471.506)(235.1523, 764.06)(214.6363, 37319.406)(215.13994, 1859.1466)(218.1533, 1363.7)(255.13629, 227.38501)(241.13724, 2347.7244)
Spinacetin 3-O-glucosyl-(1-6)-glucoside	Sesquiterpene lactones	1	1	1	1	1	1		1	1	310250	288771	1	1		Spinacetin 3-O-glucosyl-(1-6)-glucoside [ C29 H34 O18, tgt= ]	(675.17926, 38368.344)(676.18176, 9035.906)(688.20856, 9421.335)(689.2085, 743.72)(699.17645, 409.21503)
cebellin F	Sesquiterpene lactones	1011949	855914	1862470	1952552	1207690	1194215		2033892	1534781	2654849	2606973	1208505	920631		cebellin F [ C20 H24 O6, tgt=60.18, overall=60.18 ]	(360.16086, 1796.3539)(347.1603, 3747.377)(345.66217, 5990.43)(348.1645, 1104.49)(378.1862, 146.1)(387.10553, 100240.61)(388.09973, 13935.4795)(369.14526, 55684.457)(370.14957, 12205.457)
cebellin J	Sesquiterpene lactones	585408	643642	1384367	848356	1203825	2591999		2877741	777404	4190255	2917394	2710130	2247271		cebellin J [ C19 H25 Cl O8, tgt=48.69, overall=48.69 ]	(419.83942, 10586.112)(419.12787, 2234.4375)(419.1252, 374.27)(399.11856, 1721.4016)(419.13788, 8908.1)(418.1387, 1476.14)(399.95554, 31984.533)(400.12442, 8893.66)(401.1188, 8490.61)(440.1149, 16608.322)(418.06042, 6150.041)(420.48447, 2463.2234)(423.1523, 266.08)(439.9356, 48604.35)(442.44507, 5235.744)(441.1232, 593.91)(425.91022, 1825.4401)
vitexina	Sesquiterpene lactones	92631	93722	172351	164297	136529	138137		167730	157967	298296	298760	146045	130016		vitexina [ C21 H20 O10, tgt=52.43, overall=52.43 ]	(433.10538, 131312.83)(434.10797, 21300.26)(435.11124, 4190.0728)(415.89883, 1520.8679)(419.11456, 2071.205)(455.15128, 1258.35)(434.1346, 9817.253)(433.12274, 810.695)(456.36523, 36719.895)(456.09155, 34098.16)(457.09338, 4319.1797)(437.94806, 7319.81)(442.0972, 2505.78)
8alpha-O-hydroxy-4-epi-sonchucarpolide	Sesquiterpene lactones	278033	253000	507513	423101	255049	247417		1257298	1242682	5059106	4943867	243828	302304		8alpha-O-hydroxy-4-epi-sonchucarpolide [ C15 H20 O5, tgt=68.94, overall=68.94 ]	(280.73242, 5089.9614)(263.12155, 56577.582)(264.12448, 4865.048)(283.1456, 236.28)(263.12778, 19793.23)(264.1316, 3768.29)(289.1212, 107936.484)(290.12436, 11072.636)
cebellin D	Sesquiterpene lactones	911886	1286227	17024308	16866608	13802583	13630972		20821650	7202778	31714208	13118643	13966182	13250310		cebellin D [ C20 H25 Cl O7, tgt=69.00, overall=69.00 ]	(413.22784, 2528.5413)(414.12872, 4823.4697)(395.12366, 5166.3237)(399.12024, 3000.5225)(400.12335, 178.87)(415.71124, 12054.866)(416.1339, 2727.485)(417.13696, 8200.365)(418.13925, 804.31)(395.12534, 469930.56)(396.12817, 73278.78)(397.1347, 33797.79)(398.13666, 2457.9)(430.7753, 5637.2515)(433.1702, 1358.2374)(413.88934, 31051.727)(416.15292, 5716.717)(417.1522, 14364.504)(437.78656, 12932.336)…
11beta,13-dihydrocnicin	Sesquiterpene lactones	307461	1	1	1	3517609	1		1320680	920257	1438150	1444418	1	1		11beta,13-dihydrocnicin [ C20 H28 O7, tgt=37.06, overall=37.06 ]	(381.58804, 17806.965)(383.19458, 5416.1196)(385.1991, 396.59)(367.18195, 733.33496)(384.2007, 5787.14)(385.1987, 1129.11)(366.52402, 1060.3301)(398.2172, 68480.34)(399.2176, 8181.28)(383.66898, 3123.1846)(385.01688, 523.967)(404.0057, 567.11163)(389.17172, 40438.96)(390.17456, 5113.3525)
Coronopilin	Sesquiterpene lactones	1627154	1640949	1436995	1440648	1311022	1272515		1676923	1684962	1649171	1679793	1307619	1273653		Coronopilin [ C15 H20 O4, tgt=60.82, overall=60.82 ]	(247.12675, 49186.812)(248.1299, 3945.8254)(267.15207, 631.1909)
8alpha-O-(3-hydroxy-4-acetoxy-2-methylenebutanoyloxy)-4-epi-sonchucarpolide	Sesquiterpene lactones	9602260	9832941	14221973	13887864	16751036	16589806		3571919	3586272	15427614	15180497	16490047	16036795		8alpha-O-(3-hydroxy-4-acetoxy-2-methylenebutanoyloxy)-4-epi-sonchucarpolide [ C22 H28 O9, tgt=83.06, overall=83.06 ]	(438.85037, 12347.763)(439.51733, 378.85)(439.1839, 11052.89)(418.71228, 9990.881)(420.17236, 4658.4517)(421.16827, 1912.074)(438.68625, 303649.97)(439.61792, 81608.71)(439.1927, 36273.43)(440.19464, 2392.7852)(420.17285, 9290.923)(420.17178, 3859.3835)(421.1677, 1088.9434)(455.21515, 5600.459)(460.25076, 226524.02)(460.159, 64082.64)(461.16153, 13064.423)(462.1632, 857.86)(441.14813, 36837.4)(44…
quercetina	Sesquiterpene lactones	2305913	2141838	2008616	177742	279504	2039418		194888	2258407	285552	2926288	263859	259315		quercetina [ C15 H10 O7, tgt=56.54, overall=56.54 ]	(303.04526, 49788.01)(304.04816, 5011.9697)(305.05005, 977.675)(284.7846, 27964.959)(285.03387, 6252.608)(305.05716, 4247.5835)(286.54205, 14090.074)(324.091, 1505.42)(325.0855, 922.06)(302.0678, 387.91)(327.0392, 438.78)
Arctolide	Sesquiterpene lactones	6101877	6004349	10270677	41278036	39813112	42299936		11673916	43877712	99728464	98181376	41867916	39379856		Arctolide [ C17 H20 O6, tgt=77.33, overall=77.33 ]	(322.13156, 2074.89)(341.8834, 3309.5894)(324.15588, 824.645)(346.791, 48114.703)(347.74683, 5017.1006)(329.11572, 230827.86)(330.11865, 26834.408)
11beta,13-dihydrpourospermal A	Sesquiterpene lactones	278033	253000	507513	423101	255049	247417		1257298	1242682	5059106	4943867	243828	302304		11beta,13-dihydrpourospermal A [ C15 H20 O5, tgt=68.94, overall=68.94 ]	(280.73242, 5089.9614)(263.12155, 56577.582)(264.12448, 4865.048)(283.1456, 236.28)(263.12778, 19793.23)(264.1316, 3768.29)(289.1212, 107936.484)(290.12436, 11072.636)
brachynereolide	Sesquiterpene lactones	1216717	24964810	7901237	7764548	10250425	10063752		4722007	4719923	17367796	16886536	10731022	10238765		brachynereolide [ C21 H30 O8, tgt=60.51, overall=60.51 ]	(412.06424, 135992.48)(413.20187, 30624.139)(413.34833, 27049.307)(414.20453, 2921.8452)(393.5017, 121787.13)(394.1855, 37448.35)(395.19183, 12251.199)(413.20764, 62296.016)(414.2103, 8509.6455)(415.2179, 2959.96)(395.19818, 560098.1)(396.20135, 110512.336)(397.20337, 16621.703)(398.20505, 1891.36)(428.7262, 2270.75)(431.2382, 1133.64)(414.22556, 3579.875)(434.52005, 3303.7634)(419.18262, 115113.…
Eupatoroxin	Sesquiterpene lactones	8523953	8961152	15364424	14697431	9921357	9730903		12835655	13036689	22808116	21376308	10385127	9712040		Eupatoroxin [ C20 H24 O8, tgt=96.94, overall=96.94 ]	(393.74847, 1041.7839)(395.15778, 986.06995)(374.95663, 6016.6123)(375.14157, 598.9825)(395.15872, 856.2933)(375.1489, 12382.58)(410.268, 307637.5)(411.2756, 120911.72)(412.188, 13148.442)(416.54083, 8922.644)(416.93906, 1799.8939)(401.13376, 12835.638)(402.1367, 1914.735)
15-hydroxyhypocretenolide-beta-D-glucopyranoside	Sesquiterpene lactones	139783	145758	383099	383963	308172	298097		1284850	1163880	1410330	1335395	283082	261132		15-hydroxyhypocretenolide-beta-D-glucopyranoside [ C21 H18 O6, tgt=63.41, overall=63.41 ]	(366.10965, 145518.36)(367.1217, 41709.85)(368.12485, 5393.1924)(353.11203, 2266.8755)(371.1235, 27634.85)(353.1145, 3005.5552)(387.1545, 38539.414)(388.15802, 2842.2256)(389.1546, 86268.53)(369.14563, 85694.32)(370.14838, 23216.969)(392.10736, 12934.364)(394.11194, 2372.1282)(376.10034, 3101.6633)
8-deoxylactucin	Sesquiterpene lactones	2661909	2779832	2350637	2644552	2843879	2860454		2950769	2948115	719203	714026	2909217	2861626		8-deoxylactucin [ C15 H16 O4, tgt=59.37, overall=59.37 ]	(261.10608, 69895.7)(262.10895, 5854.531)(243.09882, 42909.773)(243.099, 3167.9402)(263.12067, 675.223)(260.1297, 2113.29)(287.10522, 32065.26)(288.10822, 1236.24)(267.08612, 779.92365)
taraxinic acid-1'-O-beta-D-glucopyranoside	Sesquiterpene lactones	3196328	3234412	6118424	6072121	6410947	6439593		9440571	5101477	8977225	8625100	3647935	3447884		taraxinic acid-1'-O-beta-D-glucopyranoside [ C21 H30 O9, tgt=91.22, overall=91.22 ]	(427.5873, 28740.45)(428.59454, 22555.29)(429.60263, 15265.317)(430.20444, 2104.9968)(408.5477, 61219.875)(410.05435, 20066.148)(411.19196, 53941.46)(412.19458, 8186.0234)(429.20084, 29714.861)(430.20422, 3973.1687)(431.21173, 2085.974)(411.19244, 638108.2)(412.19568, 127365.59)(413.1963, 31749.025)(414.1984, 2449.4978)(449.1787, 1205.645)(433.3729, 4176.414)(435.1742, 276.09)
Dehydrocostuslactone	Sesquiterpene lactones	1	102180	500091	494153	848549	1		331577	329398	352272	1	1	764774		Dehydrocostuslactone [ C15 H18 O2, tgt=47.62, overall=47.62 ]	(231.13069, 4074.8965)(213.12004, 1580.1566)(233.14537, 906.1725)(215.13547, 8529.577)(216.4732, 1155.7533)(251.17114, 2644.1204)(230.1542, 22678.342)(231.15631, 1378.2488)(254.9229, 5768.2856)
germacranolides stenophyllolide	Sesquiterpene lactones	1627154	1640949	1436995	1440648	1311022	1272515		1676923	1684962	1649171	1679793	1307619	1273653		germacranolides stenophyllolide [ C15 H20 O4, tgt=60.82, overall=60.82 ]	(247.12675, 49186.812)(248.1299, 3945.8254)(267.15207, 631.1909)
intybulide A	Sesquiterpene lactones	699805	746721	1210735	1307430	1651051	1667620		1794360	1747188	3783878	3668841	1761863	1731547		intybulide A [ C15 H16 O5, tgt=69.73, overall=69.73 ]	(277.10028, 41918.703)(278.1033, 3836.2422)(278.0688, 10172.807)(278.10278, 1705.9099)(295.1354, 1478.922)(280.1336, 1607.2183)(303.10004, 65538.96)(304.10297, 5640.057)(282.0826, 471.35)
Enhydrin	Sesquiterpene lactones	345558	450830	460613	2300039	3434882	3239345		813585	840096	4079207	8200011	3251705	3087844		Enhydrin [ C23 H28 O10, tgt=49.84, overall=49.84 ]	(466.10477, 2011.6406)(446.51358, 15260.643)(447.65643, 3004.6257)(449.16016, 466.43)(467.18085, 5107.7803)(447.33286, 10801.785)(448.168, 2901.755)(449.1523, 439.04)(484.71027, 4544.73)(487.9098, 3334.176)(471.72443, 10793.822)(472.9559, 1765.476)(473.1631, 11040.05)(474.1662, 2712.78)
Ludalbin	Sesquiterpene lactones	6759247	933076	11756506	7444110	337279	1		2214833	4125411	14369012	445907	3861622	2753173		Ludalbin [ C17 H22 O5, tgt=61.64, overall=61.64 ]	(288.1389, 1259.215)(308.82684, 1826.8932)(289.1466, 2690.4568)(306.171, 19652.05)(333.1458, 9619.39)(334.1475, 773.73)(315.1361, 60999.402)(316.13907, 6766.952)
emodin-8-O-D-glucopiranoside	Sesquiterpene lactones	92631	93722	126267	164297	136529	138137		167730	157967	298296	298760	146045	130016		emodin-8-O-D-glucopiranoside [ C21 H20 O10, tgt=52.43, overall=52.43 ]	(433.10538, 131312.83)(434.10797, 21300.26)(435.11124, 4190.0728)(415.89883, 1520.8679)(419.11456, 2071.205)(455.15128, 1258.35)(434.4692, 11357.981)(433.12274, 810.695)(456.42593, 33817.508)(456.09155, 34098.16)(457.09338, 4319.1797)(437.94806, 7605.077)(442.0972, 2505.78)
Cumambrin A	Sesquiterpene lactones	6759247	933076	11756506	7444110	337279	1		2214833	4125411	14369012	445907	3861622	2753173		Cumambrin A [ C17 H22 O5, tgt=61.64, overall=61.64 ]	(288.1389, 1259.215)(308.82684, 1826.8932)(289.1466, 2690.4568)(306.171, 19652.05)(333.1458, 9619.39)(334.1475, 773.73)(315.1361, 60999.402)(316.13907, 6766.952)
Cumambrin B	Sesquiterpene lactones	1627154	1640949	1436995	1440648	1311022	1272515		1676923	1684962	1649171	1679793	1307619	1273653		Cumambrin B [ C15 H20 O4, tgt=60.82, overall=60.82 ]	(247.12675, 49186.812)(248.1299, 3945.8254)(267.15207, 631.1909)
8-Desacetylcentaurepensin-8-O-(4-hydroxy)tiglinat	Sesquiterpene lactones	2757569	435477	6541262	7149563	17446338	17026988		7188351	7151282	14099225	2426450	17379516	16558598		8-Desacetylcentaurepensin-8-O-(4-hydroxy)tiglinat [ C20 H25 Cl O4, tgt=54.65, overall=54.65 ]	(368.2886, 58886.348)(370.14893, 16854.357)(349.68958, 3595.6033)(352.141, 678.425)(371.16028, 79613.56)(372.16443, 18930.951)(350.85904, 5709.979)(350.14343, 105.17667)(385.17514, 7962.8203)(386.68253, 3857.3333)(387.69012, 6234.245)(367.1664, 28664.51)(368.1693, 3043.52)(388.63315, 11330.148)(390.1351, 650.58203)(371.07422, 71763.83)(370.788, 137152.61)
Deacylcynaropicrin	Sesquiterpene lactones	812789	756726	983110	1016447	563308	541785		1619750	1595476	6492910	6358180	497143	494158		Deacylcynaropicrin [ C15 H18 O4, tgt=94.31, overall=94.31 ]	(264.62653, 691.69995)(263.12778, 15684.95)(264.1316, 2970.9448)(247.12457, 4088.9453)(289.12115, 66635.98)(290.12405, 5166.688)(268.32346, 2421212.2)(269.10358, 391250.47)(270.10522, 46583.24)(271.1071, 2486.6184)
chloroscoparin	Sesquiterpene lactones	15855154	16467207	1245177	1114980	894372	884939		1143517	4479920	2409847	2381000	733346	848359		chloroscoparin [ C22 H27 Cl O8, tgt=55.69, overall=55.69 ]	(454.9997, 5182.681)(455.1328, 179.16)(439.80292, 749.3855)(442.63934, 3108.52)(443.1425, 2973.61)(457.48306, 7950.254)(458.82056, 1534.2001)(437.5971, 52579.71)(438.13754, 7831.9966)(439.13788, 2394.521)(440.1513, 600.97)(472.52637, 1496.241)(458.02087, 76300.06)(458.16342, 17185.207)(459.17346, 17454.46)(460.1747, 2410.5767)(480.12427, 809.99335)(483.1392, 5674.37)(484.1424, 448.23)(461.3444, 5…
Glutatione	Sesquiterpene lactones	474937	457479	548305	558871	2472274	747168		936136	903600	1694338	1	2442459	410946		Glutatione [ C10 H17 N3 O6 S, tgt=52.98, overall=52.98 ]	(309.7205, 34783.074)(309.58496, 2552.265)(293.40707, 1915.7017)(309.75778, 218262.25)(309.08945, 30601.01)(310.0848, 9556.98)(291.08035, 27441.838)(292.08276, 3278.6035)(293.07776, 2382.79)(329.1151, 4564.99)(307.1099, 21443.398)(308.11288, 1950.2632)(309.1251, 302.37)(336.07812, 4867.9985)(316.56488, 741.05)
ixerin V	Sesquiterpene lactones	2775582	2780935	1721275	1696148	665957	3100635		1783805	33753444	3436113	3380831	2946869	2843037		ixerin V [ C21 H32 O8, tgt=59.76, overall=59.76 ]	(413.20734, 33739.824)(414.43533, 5433.098)(415.22235, 26518.166)(416.2263, 5725.08)(395.19815, 1245745.2)(396.20163, 310594.6)(397.2032, 42742.004)(398.20508, 4738.5723)(415.22324, 100886.28)(416.22598, 14399.261)(417.23065, 3156.7651)(397.21432, 241460.3)(398.21732, 43895.99)(399.218, 5529.783)(436.92245, 2065.6343)(437.2089, 17796.34)(438.2106, 1825.47)
tarassacolide-1-O-D-glucopiranoside	Sesquiterpene lactones	949482	24858644	2912171	35623608	21962924	21800160		44073896	43549780	19476242	17637072	21398274	21034322		tarassacolide-1-O-D-glucopiranoside [ C21 H32 O9, tgt=60.51, overall=60.51 ]	(429.98508, 23636.037)(430.20468, 4700.792)(431.21432, 1458.6699)(411.19278, 830105.7)(412.1959, 152371.4)(413.41592, 34399.434)(414.20584, 5011.8115)(431.2167, 1429.21)(413.20667, 61993.41)(414.21, 8557.818)(415.2138, 1199.49)(430.23553, 4463.8823)(431.23682, 1151.61)(453.20053, 6780.181)(454.20386, 1432.405)(433.47318, 3540.404)
ixerin T	Sesquiterpene lactones	433084	442345	506750	509192	513374	524429		749548	758351	1242105	1208842	531456	517003		ixerin T [ C16 H25 O4, tgt=75.34, overall=75.34 ]	(283.1847, 428.9)(263.1608, 345903.0)(264.16373, 47935.785)(265.16617, 4534.18)(283.1854, 570.0877)(305.16785, 139403.89)(306.17075, 15558.399)
Taraxacin	Sesquiterpene lactones	2073239	2069325	2350141	2247202	3106563	3015624		793480	770186	733285	723995	2895602	1		Taraxacin [ C15 H14 O3, tgt=52.33, overall=52.33 ]	(242.82526, 71039.46)(243.09904, 8651.158)(225.0852, 57118.844)(226.08948, 779.6)(260.12988, 13287.382)(261.1309, 1449.6537)(252.08968, 16892.543)
Astaxantina	Sesquiterpene lactones	3231399	3019050	334867	674257	657170	709746		1607469	1654569	1341978	1112286	652490	680199		Astaxantina [ C40 H52 O4, tgt=70.41, overall=70.41 ]	(598.59344, 32806.414)(599.59674, 12070.644)(600.5208, 10331.965)(600.4024, 4812.9224)(582.3887, 305.79)(598.6423, 26393.516)(599.65063, 13285.62)(601.0772, 24467.053)(601.4133, 19978.48)(602.4164, 2502.44)(583.40424, 6765.855)(584.407, 2082.83)(617.28064, 20390.047)(619.4269, 1183.2749)(596.4127, 27154.885)(597.41504, 1789.6439)(624.0654, 34597.938)(624.39966, 17135.7)(625.4007, 4378.4)(606.3741…
Eupachlorin acetate	Sesquiterpene lactones	15855154	16467207	1245177	1114980	894372	884939		1143517	4479920	2409847	2381000	733346	848359		Eupachlorin acetate [ C22 H27 Cl O8, tgt=55.69, overall=55.69 ]	(454.9997, 5182.681)(455.1328, 179.16)(439.80292, 749.3855)(442.63934, 3108.52)(443.1425, 2973.61)(457.48306, 7950.254)(458.82056, 1534.2001)(437.5971, 52579.71)(438.13754, 7831.9966)(439.13788, 2394.521)(440.1513, 600.97)(472.52637, 1496.241)(458.02087, 76300.06)(458.16342, 17185.207)(459.17346, 17454.46)(460.1747, 2410.5767)(480.12427, 809.99335)(483.1392, 5674.37)(484.1424, 448.23)(461.3444, 5…
ixerin Y	Sesquiterpene lactones	1877847	1	5283522	5047406	3362182	3761130		8947982	9143697	9461109	11016090	3395591	3734832		ixerin Y [ C21 H28 O9, tgt=73.20, overall=73.20 ]	(425.57343, 144254.6)(426.64908, 30377.496)(427.4354, 66297.125)(428.18753, 12583.009)(406.41605, 12144.53)(407.17157, 2357.1348)(427.1872, 323327.34)(428.19028, 54081.32)(429.19717, 22321.148)(430.19763, 987.87)(408.98587, 222091.42)(410.1798, 45312.8)(442.20453, 4211.25)(425.20444, 996.59393)(447.1622, 3498.348)(433.15945, 918.95996)
ixerin X	Sesquiterpene lactones	949482	24858644	2912171	35623608	21962924	21800160		44073896	43549780	19476242	17637072	21398274	21034322		ixerin X [ C21 H32 O9, tgt=60.51, overall=60.51 ]	(429.98508, 23636.037)(430.20468, 4700.792)(431.21432, 1458.6699)(411.19278, 830105.7)(412.1959, 152371.4)(413.41592, 34399.434)(414.20584, 5011.8115)(431.2167, 1429.21)(413.20667, 61993.41)(414.21, 8557.818)(415.2138, 1199.49)(430.23553, 4463.8823)(431.23682, 1151.61)(453.20053, 6780.181)(454.20386, 1432.405)(433.47318, 3540.404)
ixerin E	Sesquiterpene lactones	949482	24858644	2912171	35623608	21962924	21800160		44073896	43549780	19476242	17637072	21398274	21034322		ixerin E [ C21 H32 O9, tgt=60.51, overall=60.51 ]	(429.98508, 23636.037)(430.20468, 4700.792)(431.21432, 1458.6699)(411.19278, 830105.7)(412.1959, 152371.4)(413.41592, 34399.434)(414.20584, 5011.8115)(431.2167, 1429.21)(413.20667, 61993.41)(414.21, 8557.818)(415.2138, 1199.49)(430.23553, 4463.8823)(431.23682, 1151.61)(453.20053, 6780.181)(454.20386, 1432.405)(433.47318, 3540.404)
ixerin F	Sesquiterpene lactones	3196328	3234412	6118424	6072121	6410947	6439593		9440571	5101477	8977225	8625100	3647935	3447884		ixerin F [ C21 H30 O9, tgt=91.22, overall=91.22 ]	(427.5873, 28740.45)(428.59454, 22555.29)(429.60263, 15265.317)(430.20444, 2104.9968)(408.5477, 61219.875)(410.05435, 20066.148)(411.19196, 53941.46)(412.19458, 8186.0234)(429.20084, 29714.861)(430.20422, 3973.1687)(431.21173, 2085.974)(411.19244, 638108.2)(412.19568, 127365.59)(413.1963, 31749.025)(414.1984, 2449.4978)(449.1787, 1205.645)(433.3729, 4176.414)(435.1742, 276.09)
diain	Sesquiterpene lactones	21471980	21614220	22540260	22110796	31924714	31521724		11692919	11636600	12881741	13088508	30737772	30800552		diain [ C22 H31 Cl O7, tgt=68.62, overall=68.62 ]	(442.61877, 31120.133)(425.66583, 10870.981)(428.9162, 104781.02)(430.42065, 16803.133)(431.18045, 48221.63)(443.17963, 25869.998)(444.18396, 2328.0)(425.1709, 785879.8)(426.1745, 146559.8)(427.1764, 27258.836)(428.1783, 1841.959)(460.21454, 843.91)(442.95227, 6533.6187)(446.1973, 1465.6167)(447.20892, 679.4)(469.99905, 110497.29)(470.89825, 51514.21)(471.62045, 81194.79)(472.17676, 22652.621)(44…
ixerin D	Sesquiterpene lactones	3196328	3234412	6118424	6072121	6410947	6439593		1	5101477	8977225	8625100	3647935	3447884		ixerin D [ C21 H30 O9, tgt=91.22, overall=91.22 ]	(427.5873, 28740.45)(428.59454, 22555.29)(429.60263, 15265.317)(430.20444, 2104.9968)(408.5685, 62453.332)(410.17993, 22059.861)(411.19196, 53941.46)(412.19458, 8186.0234)(429.20102, 32049.176)(430.20425, 4132.706)(431.21173, 2085.974)(411.19244, 708577.3)(412.19565, 134242.62)(413.19632, 35151.227)(414.1984, 2449.4978)(449.1787, 1205.645)(432.92227, 5191.1104)(435.1742, 276.09)
ixerin A	Sesquiterpene lactones	1627154	1640949	1436995	1440648	1311022	1272515		1676923	1684962	1649171	1679793	1307619	1273653		ixerin A [ C15 H20 O4, tgt=60.82, overall=60.82 ]	(247.12675, 49186.812)(248.1299, 3945.8254)(267.15207, 631.1909)
15-deschloro-I5-hydroxyepisolstiolide	Sesquiterpene lactones	847346	902951	1658751	1773700	1340470	2727971		1022825	1061697	1871216	3777810	1336144	1265056		15-deschloro-I5-hydroxyepisolstiolide [ C19 H24 O8, tgt=60.12, overall=60.12 ]	(381.2469, 195312.52)(382.25516, 26962.092)(383.15952, 19640.266)(363.13492, 1223.4299)(383.1604, 17137.877)(384.16367, 941.32837)(365.15085, 12567.077)(366.1539, 1121.89)(398.2801, 3859.5981)(399.18448, 673.28)(380.57336, 4375.85)(405.13635, 2300.6516)(406.1396, 524.18)(388.63815, 1763.9225)
ixerin B	Sesquiterpene lactones	1877847	1	5283522	5047406	3362182	3761130		8947982	9143697	9461109	11016090	3395591	3734832		ixerin B [ C21 H28 O9, tgt=73.20, overall=73.20 ]	(425.57343, 144254.6)(426.64908, 30377.496)(427.4354, 66297.125)(428.18753, 12583.009)(406.41605, 12144.53)(407.17157, 2357.1348)(427.1872, 323327.34)(428.19028, 54081.32)(429.19717, 22321.148)(430.19763, 987.87)(408.98587, 222091.42)(410.1798, 45312.8)(442.20453, 4211.25)(425.20444, 996.59393)(447.1622, 3498.348)(433.15945, 918.95996)
repin	Sesquiterpene lactones	2424045	2443534	22981264	22481920	4491980	4445001		23577224	23411956	50181396	49057204	4425037	4235649		repin [ C19 H22 O7, tgt=68.43, overall=68.43 ]	(349.14026, 8314.728)(389.13525, 13704.298)(371.12576, 231010.7)(372.12817, 27283.547)
ixerin J	Sesquiterpene lactones	275289	279417	1	523683	441140	446768		1036184	1041780	517728	1	434391	428086		ixerin J [ C15 H30 O9, tgt=54.43, overall=54.43 ]	(381.1869, 7681.16)(382.19452, 2405.98)(359.16672, 34532.977)(360.16895, 1974.5963)
Melampodin-A	Sesquiterpene lactones	366106	381022	1331598	550966	408427	406503		546927	452581	1268795	2028214	2828436	1		Melampodin-A [ C21 H24 O9, tgt=46.46, overall=46.46 ]	(423.1539, 1056.1799)(425.1505, 115828.07)(404.1403, 3456.337)(423.40552, 3727.79)(424.1572, 1384.63)(404.39523, 5141.1123)(405.1433, 11080.86)(439.18375, 1085.3499)(422.67413, 5322.6426)(424.1799, 2064.99)(445.21616, 15619.993)(446.14264, 4066.187)(447.1438, 551.2767)(426.72638, 15500.943)(426.6999, 2175.2456)
ixerin H	Sesquiterpene lactones	128498	131028	411401	488869	191327	186548		300941	290071	2763049	676408	98707	107439		ixerin H [ C28 H32 O8, tgt=47.58, overall=47.58 ]	(500.65787, 4078.3948)(482.32593, 4806.9175)(484.2168, 1340.36)(484.16733, 5963.5596)(485.12485, 2962.398)(517.25165, 487.09)(498.85895, 2541.1975)(499.90933, 2118.7014)(524.99817, 4562.0415)(523.2052, 1345.27)(525.2204, 3252.37)(502.79028, 5663.962)(504.79718, 1463.492)
2alpha, 8beta-dihydroxy-1alphaH,5alphaH,6betaH,7alphaH-guai-4(15),10(14),11(13)-trien-6,12-olide?	Sesquiterpene lactones	812789	756726	983110	1016447	563308	541785		1619750	1595476	6492910	6358180	497143	494158		2alpha, 8beta-dihydroxy-1alphaH,5alphaH,6betaH,7alphaH-guai-4(15),10(14),11(13)-trien-6,12-olide? [ C15 H18 O4, tgt=94.31, overall=94.31 ]	(264.62653, 691.69995)(263.12778, 15684.95)(264.1316, 2970.9448)(247.12457, 4088.9453)(289.12115, 66635.98)(290.12405, 5166.688)(268.32346, 2421212.2)(269.10358, 391250.47)(270.10522, 46583.24)(271.1071, 2486.6184)
(E,E)-farnesylacetate	Sesquiterpene lactones	918294	1049321	1	1667448	869457	871208		639518	626099	1110782	1	935988	944308		(E,E)-farnesylacetate [ C17 H28 O2, tgt=48.11, overall=48.11 ]	(264.22867, 256671.47)(265.23166, 39353.508)(266.23438, 4897.206)(287.19623, 81449.02)(288.19928, 11442.779)(289.207, 372.51)
11,13-Dihydrovernodalin	Sesquiterpene lactones	2424045	2443534	22981264	22481920	4491980	4445001		23577224	23411956	50181396	49057204	4425037	4235649		11,13-Dihydrovernodalin [ C19 H22 O7, tgt=68.43, overall=68.43 ]	(349.14026, 8314.728)(389.13525, 13704.298)(371.12576, 231010.7)(372.12817, 27283.547)
Chamissonolide	Sesquiterpene lactones	1	7171932	1	697204	5045692	1		2400729	2663330	1601061	1	1	1		Chamissonolide [ C17 H24 O6, tgt=43.76, overall=43.76 ]	(326.4938, 9950.496)(327.96533, 2075.7183)(307.14606, 5191.566)(327.1716, 357.125)(309.1617, 1820.3433)(350.49094, 398.28)(333.14484, 724.98)
Hierapolitanin D	Sesquiterpene lactones	728339	758823	1704026	1676217	953683	960720		1804500	1764317	3291554	3225303	913681	875418		Hierapolitanin D [ C21 H34 O9, tgt=55.83, overall=55.83 ]	(431.22586, 3500.0398)(413.45926, 38516.38)(414.21063, 6987.0986)(415.22183, 20239.236)(416.22604, 2780.2869)(415.22324, 54862.625)(416.22623, 10097.363)(417.23, 2956.79)(449.2583, 271.87)(431.2483, 9285.945)(432.2515, 1060.78)(455.21603, 13822.403)(456.34512, 1820.3313)(437.10806, 2225.4487)
8alpha-O-hydroxy-15-oxo-5,7alpha,6,11beta-elema-1,3-dien-6,12-olide	Sesquiterpene lactones	40975296	100547304	57350488	56563496	116075296	59858748		101905456	102710736	119581280	117052488	65179712	64054192		8alpha-O-hydroxy-15-oxo-5,7alpha,6,11beta-elema-1,3-dien-6,12-olide [ C19 H26 O6, tgt=64.53, overall=64.53 ]	(350.53452, 30698.07)(351.17093, 10761.042)(333.16068, 397.4725)(353.1871, 8682.42)(354.18967, 837.15)(376.39258, 23320.926)(378.1742, 3448.9263)(358.9006, 168847.58)(359.8307, 17263.57)
Hierapolitanin C	Sesquiterpene lactones	2775582	2780935	1721275	1696148	665957	3100635		1783805	33753444	3436113	3380831	2946869	2843037		Hierapolitanin C [ C21 H32 O8, tgt=59.76, overall=59.76 ]	(413.20734, 33739.824)(414.43533, 5433.098)(415.22235, 26518.166)(416.2263, 5725.08)(395.19815, 1245745.2)(396.20163, 310594.6)(397.2032, 42742.004)(398.20508, 4738.5723)(415.22324, 100886.28)(416.22598, 14399.261)(417.23065, 3156.7651)(397.21432, 241460.3)(398.21732, 43895.99)(399.218, 5529.783)(436.92245, 2065.6343)(437.2089, 17796.34)(438.2106, 1825.47)
Hierapolitanin B	Sesquiterpene lactones	8523953	8961152	15364424	14697431	9921357	9730903		12835655	13036689	22808116	21376308	10385127	9712040		Hierapolitanin B [ C20 H24 O8, tgt=96.94, overall=96.94 ]	(393.74847, 1041.7839)(395.15778, 986.06995)(374.95663, 6016.6123)(375.14157, 598.9825)(395.15872, 856.2933)(375.1489, 12382.58)(410.268, 307637.5)(411.2756, 120911.72)(412.188, 13148.442)(416.54083, 8922.644)(416.93906, 1799.8939)(401.13376, 12835.638)(402.1367, 1914.735)
Hierapolitanin A	Sesquiterpene lactones	6116536	5765442	1	12617573	12650205	4160537		9993527	10011105	13354442	14039743	12585905	11913723		Hierapolitanin A [ C19 H24 O6, tgt=71.17, overall=71.17 ]	(349.6624, 3532.535)(351.17188, 463.15002)(331.1561, 5178.8)(375.15488, 19041.15)(376.15906, 2247.9265)(357.1468, 577816.94)(358.14972, 79754.78)
8alpha-hydroxy-11beta,13-dihydrozaluzanin C	Sesquiterpene lactones	1627154	1640949	1436995	1440648	1311022	1272515		1676923	1684962	1649171	1679793	1307619	1273653		8alpha-hydroxy-11beta,13-dihydrozaluzanin C [ C15 H20 O4, tgt=60.82, overall=60.82 ]	(247.12675, 49186.812)(248.1299, 3945.8254)(267.15207, 631.1909)
luteolina7-O-rutinoside	Sesquiterpene lactones	18949792	20720822	17804492	16652671	15097705	14193846		23674828	26472888	24311160	25598548	17411848	21522280		luteolina7-O-rutinoside [ C27 H30 O16, tgt=54.35, overall=54.35 ]	(611.1511, 41391.773)(612.15356, 8718.47)(613.1554, 401.39502)(613.1285, 40488.113)(614.1263, 12245.963)(614.1696, 8495.54)(610.17615, 308310.28)(611.17664, 169018.27)(633.1338, 517915.5)(634.13696, 142259.44)(635.1386, 26588.637)(636.1399, 2735.41)(615.1298, 4931.5903)(617.12787, 537.0688)
lactucain A	Sesquiterpene lactones	6353477	6646646	12274257	12129703	13849188	13917065		9263315	8963879	21089550	20361540	13312777	13170532		lactucain A [ C30 H32 O7, tgt=76.14, overall=76.14 ]	(507.8883, 1054.9567)(487.2081, 419708.84)(488.21094, 78955.43)(489.21332, 12365.037)(490.21512, 260.55002)(511.2399, 418.2)(487.20715, 178095.75)(488.21, 33056.258)(489.21332, 6734.2607)(490.2153, 1570.41)(527.9329, 1348.458)(511.20636, 3593.5027)
Qinghaosu	Sesquiterpene lactones	1691118	1983424	1	161483	2235659	2212869		134257	655172	165308	892771	2084469	2013534		Qinghaosu [ C15 H22 O5, tgt=65.40, overall=65.40 ]	(282.91583, 51422.125)(283.87668, 5757.467)(265.13693, 14340.443)(266.13968, 1298.25)(285.1638, 409.1)(306.68115, 2574.0586)
rhaposerine	Sesquiterpene lactones	338072	295449	534754	748235	493338	478785		1320163	1850321	3545790	3843116	452497	468101		rhaposerine [ C21 H27 Cl O9, tgt=57.96, overall=57.96 ]	(460.91412, 5702.9897)(461.80295, 42485.9)(462.13806, 20311.16)(463.1394, 2616.2349)(445.12405, 641.155)(463.14932, 12261.139)(464.15222, 1760.4822)(444.91476, 6017.367)(445.8075, 2654.4634)(478.89734, 3479.413)(482.03217, 4211.63)(459.3869, 115275.4)(460.99423, 43004.496)(461.16153, 12945.061)(462.1632, 857.86)(465.1641, 405.8)(481.12357, 34579.688)(482.12607, 5098.6035)(469.1236, 82513.92)(470.…
lactucain C	Sesquiterpene lactones	100762	112641	260264	316933	292217	274204		490449	487878	371613	338147	324706	297036		lactucain C [ C46 H44 O13, tgt=24.67, overall=24.67 ]	(787.26544, 6921.2026)(788.52106, 1140.3774)(789.28033, 2536.05)(823.30615, 3439.96)(805.31354, 7682.072)(806.3174, 2353.9883)(829.2755, 8909.79)(830.27814, 2592.565)(831.2815, 339.68)
lactucain B	Sesquiterpene lactones	131834	124484	293037	241487	164892	132796		430917	401983	1192460	979988	140207	134291		lactucain B [ C30 H32 O9, tgt=75.95, overall=75.95 ]	(539.963, 6811.981)(537.199, 5856.23)(521.20044, 1971.115)(541.93286, 3383.653)(543.23193, 12141.15)(523.8845, 5737.8345)(557.8446, 936.0841)(540.2348, 441.5375)(562.5844, 1009987.56)(563.84076, 310117.2)(565.2073, 61078.99)(544.4526, 12443.278)(546.1946, 9439.473)(547.1964, 1183.425)
Glaucolide-A	Sesquiterpene lactones	345558	450830	460613	2300039	3434882	3239345		813585	840096	4079207	8200011	3251705	3087844		Glaucolide-A [ C23 H28 O10, tgt=49.84, overall=49.84 ]	(466.10477, 2011.6406)(446.51358, 15260.643)(447.65643, 3004.6257)(449.16016, 466.43)(467.18085, 5107.7803)(447.33286, 10801.785)(448.168, 2901.755)(449.1523, 439.04)(484.71027, 4544.73)(487.9098, 3334.176)(471.72443, 10793.822)(472.9559, 1765.476)(473.1631, 11040.05)(474.1662, 2712.78)
11beta,13- dihydro-19-desoxycnicin	Sesquiterpene lactones	276625	274045	395072	433461	388689	405371		310922	317542	405766	399045	348732	309101		11beta,13- dihydro-19-desoxycnicin [ C20 H28 O6, tgt=81.68, overall=81.68 ]	(366.2045, 2954.41)(385.22897, 78368.48)(386.23172, 13626.819)(387.23663, 2043.95)(364.21265, 213.955)(391.18683, 793.942)(373.17493, 4429.27)(374.18054, 560.44)
hypochoeroside I	Sesquiterpene lactones	381465	410006	912851	912520	1124432	1065321		2118169	2122471	1645195	1901633	587544	575675		hypochoeroside I [ C21 H27 O9, tgt=62.28, overall=62.28 ]	(425.16925, 146241.11)(426.17297, 38339.66)(406.15924, 24445.844)(426.6185, 33918.82)(427.2824, 15901.8)(427.38666, 33542.29)(428.1883, 3783.2075)(408.4419, 46938.754)(409.37445, 25637.973)(409.8442, 26990.383)(410.1788, 9539.24)(441.20078, 30212.006)(442.2036, 3810.2358)(443.1861, 854.43)(423.33444, 808.9329)(448.76215, 5910.588)(448.15808, 1823.67)(429.1461, 31923.947)(430.1481, 4396.9155)
hypochoeroside J	Sesquiterpene lactones	1	1	1285583	989017	1156672	671654		2043384	42362624	2361109	72975792	1	591752		hypochoeroside J [ C21 H33 O8, tgt=50.53, overall=50.53 ]	(415.22122, 5301.3574)(416.72937, 2527.68)(415.55823, 55831.49)(416.22626, 9248.5)(417.2307, 3399.06)(431.24933, 119900.83)(432.25214, 25639.152)(433.25797, 3271.5835)(436.6101, 1219.399)
hypochoeroside L	Sesquiterpene lactones	682287	703528	2205844	1761536	701123	709724		3062641	3017466	4721609	1271897	589815	557893		hypochoeroside L [ C20 H32 O9, tgt=65.32, overall=65.32 ]	(416.5198, 16003.558)(417.2105, 2379.636)(399.29202, 26666.254)(400.36328, 5492.1753)(401.20502, 6425.6416)(402.8757, 683.5633)(403.21774, 12504.822)(404.2207, 1945.33)(416.7293, 4656.75)(417.23138, 1710.1549)(440.2882, 35344.535)(441.29083, 2821.206)(423.19144, 890.19165)(424.1968, 44.31)
Chiapin A	Sesquiterpene lactones	2905167	2994140	914375	2451562	1009288	1576366		851791	846369	861825	798506	971706	959098		Chiapin A [ C19 H26 O5, tgt=76.29, overall=76.29 ]	(335.6785, 11700.872)(336.17975, 1634.074)(317.17383, 25246.635)(318.17682, 2601.6748)(337.1936, 225561.06)(338.1961, 30414.87)(339.1982, 1462.63)(352.2122, 171025.45)(353.21378, 16520.35)(354.21594, 598.725)(357.9519, 7936.959)(358.1742, 2450.38)(343.1671, 102967.26)(344.1701, 16292.599)
Ovatifolin	Sesquiterpene lactones	6759247	933076	11756506	7444110	337279	1		2214833	4125411	14369012	445907	3861622	2753173		Ovatifolin [ C17 H22 O5, tgt=61.64, overall=61.64 ]	(288.1389, 1259.215)(308.82684, 1826.8932)(289.1466, 2690.4568)(306.171, 19652.05)(333.1458, 9619.39)(334.1475, 773.73)(315.1361, 60999.402)(316.13907, 6766.952)
epoxyrepdiolide	Sesquiterpene lactones	2424045	2443534	22981264	22481920	4491980	4445001		23577224	23411956	50181396	49057204	4425037	4235649		epoxyrepdiolide [ C19 H22 O7, tgt=68.43, overall=68.43 ]	(349.14026, 8314.728)(389.13525, 13704.298)(371.12576, 231010.7)(372.12817, 27283.547)
hypochoeroside A	Sesquiterpene lactones	1	24858644	1	35623608	21962924	21800160		44073896	43549780	19476242	17637072	21398274	21034322		hypochoeroside A [ C21H32O9, tgt= ]	(429.7388, 28109.98)(430.20468, 4700.792)(431.21432, 1458.6699)(411.19287, 947170.8)(412.19614, 174578.77)(413.4508, 32714.947)(414.20456, 4869.7485)(413.20447, 24621.373)(414.2085, 3440.9802)(453.20084, 5385.048)(454.20386, 1432.405)(433.18704, 3946.4465)
Amberboin	Sesquiterpene lactones	1627154	1640949	1436995	1440648	1311022	1272515		1676923	1684962	1649171	1679793	1307619	1273653		Amberboin [ C15 H20 O4, tgt=60.82, overall=60.82 ]	(247.12675, 49186.812)(248.1299, 3945.8254)(267.15207, 631.1909)
ainslioside	Sesquiterpene lactones	1877847	1	5283522	5047406	3362182	3761130		8947982	9143697	9461109	11016090	3395591	3734832		ainslioside [ C21 H28 O9, tgt=73.20, overall=73.20 ]	(425.57343, 144254.6)(426.64908, 30377.496)(427.4354, 66297.125)(428.18753, 12583.009)(406.41605, 12144.53)(407.17157, 2357.1348)(427.1872, 323327.34)(428.19028, 54081.32)(429.19717, 22321.148)(430.19763, 987.87)(408.98587, 222091.42)(410.1798, 45312.8)(442.20453, 4211.25)(425.20444, 996.59393)(447.1622, 3498.348)(433.15945, 918.95996)
dentatin C	Sesquiterpene lactones	1883646	1798740	2881081	4231019	3438982	3085844		2737952	2854115	44728480	45626180	3254071	3138694		dentatin C [ C21 H30 O10, tgt=80.53, overall=80.53 ]	(444.65945, 7250.982)(445.30652, 4850.3257)(446.19846, 566.61163)(425.1718, 758393.75)(426.17462, 140788.73)(427.18433, 105861.03)(428.1872, 12090.205)(445.19498, 8440.644)(427.1866, 199599.73)(428.18964, 32299.338)(429.1969, 22568.682)(430.19763, 1741.0349)(460.21445, 247.37572)(442.2048, 2054.7449)(466.5108, 4310.2026)(447.82773, 10724.437)(448.1587, 4550.42)(449.1606, 313.15)
acidoferulico	Sesquiterpene lactones	1531513	761348	838156	1091665	1407876	865247		1548286	1610119	824101	1	1009753	1368883		acidoferulico [ C10 H10 O4, tgt=61.79, overall=61.79 ]	(195.0616, 37258.2)(196.06537, 3640.7366)(177.0516, 36734.25)(178.0547, 2289.99)(198.07085, 41224.816)(199.07492, 2443.6274)(177.05232, 229051.16)(178.05534, 17713.531)(217.10115, 7680.73)(199.09444, 1786.4901)(219.38464, 1397.7944)(201.04002, 19393.775)(203.0494, 42242.23)
epicentaurepensin	Sesquiterpene lactones	122096	123114	226301	236307	226794	190190		300494	214940	89646	120794	222918	188597		epicentaurepensin [ C19 H24 Cl2 O7, tgt=53.01, overall=53.01 ]	(435.8885, 2166.188)(438.69043, 8995.525)(441.76135, 4674.487)(442.0963, 1018.55)(421.57877, 7164.189)(437.08945, 4174.47)(442.09613, 2422.98)(455.45883, 31647.037)(456.59366, 13423.003)(458.45963, 3752.833)(438.6714, 2675.1367)(458.79767, 12919.554)(464.08203, 6057.6396)(441.0636, 78234.76)(442.06616, 9585.446)(443.0666, 757.95996)
Helenalin	Sesquiterpene lactones	812789	756726	983110	1016447	563308	541785		1619750	1595476	6492910	6358180	497143	494158		Helenalin [ C15 H18 O4, tgt=94.31, overall=94.31 ]	(264.62653, 691.69995)(263.12778, 15684.95)(264.1316, 2970.9448)(247.12457, 4088.9453)(289.12115, 66635.98)(290.12405, 5166.688)(268.32346, 2421212.2)(269.10358, 391250.47)(270.10522, 46583.24)(271.1071, 2486.6184)
8alpha-O-hydroxy-15-oxo-5,7alpha,6,11beta -elema-1,3,11(13)-trien-6,12-olide	Sesquiterpene lactones	18740056	18558220	31810936	4973575	25921776	3484765		4974747	4871877	5319012	6254609	26179346	3473389		8alpha-O-hydroxy-15-oxo-5,7alpha,6,11beta -elema-1,3,11(13)-trien-6,12-olide [ C22 H28 O8, tgt=43.87, overall=43.87 ]	(420.17682, 6616.9526)(421.17334, 1484.5782)(402.1726, 4082.9302)(404.84644, 1770.23)(446.7129, 8912.637)(448.17722, 1305.7001)(427.99673, 174304.97)(428.99905, 24505.08)
Vernodalin	Sesquiterpene lactones	3478753	3441736	1	6034033	6777918	6895146		10505173	10305906	21014784	13950425	9834935	8995127		Vernodalin [ C19 H20 O7, tgt=65.72, overall=65.72 ]	(343.11368, 97197.84)(344.1164, 21948.52)(345.1202, 20801.752)(362.38626, 1071.41)(360.14368, 17282.41)(361.1356, 8168.4756)(362.1361, 2454.42)(387.1216, 208.11002)(366.3203, 265293.12)(366.10275, 36762.984)(367.1025, 7069.443)
lappaol A	Sesquiterpene lactones	131834	124484	293037	241487	164892	132796		430917	401983	1192460	979988	140207	134291		lappaol A [ C30 H32 O9, tgt=75.95, overall=75.95 ]	(539.963, 6811.981)(537.199, 5856.23)(521.20044, 1971.115)(541.93286, 3383.653)(543.23193, 12141.15)(523.8845, 5737.8345)(557.8446, 936.0841)(540.2348, 441.5375)(562.5844, 1009987.56)(563.84076, 310117.2)(565.2073, 61078.99)(544.4526, 12443.278)(546.1946, 9439.473)(547.1964, 1183.425)
8alpha-hydroxy-15-oxo-5,7alpha,6,11beta-elema-1,3,dien-12,6-olide	Sesquiterpene lactones	1627154	1640949	1436995	1440648	1311022	1272515		1676923	1684962	1649171	1679793	1307619	1273653		8alpha-hydroxy-15-oxo-5,7alpha,6,11beta-elema-1,3,dien-12,6-olide [ C15 H20 O4, tgt=60.82, overall=60.82 ]	(247.12675, 49186.812)(248.1299, 3945.8254)(267.15207, 631.1909)
Vernoflexin	Sesquiterpene lactones	5059186	5127174	6796963	6819022	5967346	5936892		3331368	3361449	5885380	5789380	5903114	5818872		Vernoflexin [ C20 H24 O4, tgt=76.75, overall=76.75 ]	(312.1593, 256.09)(333.147, 185276.67)(334.1497, 18674.967)(335.15237, 1948.7555)
Solstitialin?A?3-Acetate	Sesquiterpene lactones	1691425	1514958	22510568	37159180	1271272	1276015		35526852	1	13964879	13599541	20785174	1258871		Solstitialin?A?3-Acetate [ C17 H21 O7, tgt=89.24, overall=89.24 ]	(339.13507, 5103.2466)(339.74185, 4795.816)(325.13596, 9254.846)(355.2854, 624819.7)(356.34708, 91513.805)(357.1711, 22751.48)(358.17505, 2385.4402)(360.12082, 705.76666)(345.70056, 21879.11)(346.4033, 4621.336)(347.1219, 2428.036)
Eupachlorin	Sesquiterpene lactones	911886	1286227	17024308	16866608	13802583	13630972		20821650	7202778	31714208	13118643	13966182	13250310		Eupachlorin [ C20 H25 Cl O7, tgt=69.00, overall=69.00 ]	(413.22784, 2528.5413)(414.12872, 4823.4697)(395.12366, 5166.3237)(399.12024, 3000.5225)(400.12335, 178.87)(415.71124, 12054.866)(416.1339, 2727.485)(417.13696, 8200.365)(418.13925, 804.31)(395.12534, 469930.56)(396.12817, 73278.78)(397.1347, 33797.79)(398.13666, 2457.9)(430.7753, 5637.2515)(433.1702, 1358.2374)(413.88934, 31051.727)(416.15292, 5716.717)(417.1522, 14364.504)(437.78656, 12932.336)…
9alpha-hydroxyzaluzanin	Sesquiterpene lactones	812789	756726	983110	1016447	563308	541785		1619750	1595476	6492910	6358180	497143	494158		9alpha-hydroxyzaluzanin [ C15 H18 O4, tgt=94.31, overall=94.31 ]	(264.62653, 691.69995)(263.12778, 15684.95)(264.1316, 2970.9448)(247.12457, 4088.9453)(289.12115, 66635.98)(290.12405, 5166.688)(268.32346, 2421212.2)(269.10358, 391250.47)(270.10522, 46583.24)(271.1071, 2486.6184)
Sonchuside?A	Sesquiterpene lactones	2775582	2780935	1721275	1696148	665957	3100635		1783805	33753444	3436113	3380831	2946869	2843037		Sonchuside?A [ C21 H32 O8, tgt=59.76, overall=59.76 ]	(413.20734, 33739.824)(414.43533, 5433.098)(415.22235, 26518.166)(416.2263, 5725.08)(395.19815, 1245745.2)(396.20163, 310594.6)(397.2032, 42742.004)(398.20508, 4738.5723)(415.22324, 100886.28)(416.22598, 14399.261)(417.23065, 3156.7651)(397.21432, 241460.3)(398.21732, 43895.99)(399.218, 5529.783)(436.92245, 2065.6343)(437.2089, 17796.34)(438.2106, 1825.47)
Sonchuside?D	Sesquiterpene lactones	1216717	24964810	7901237	7764548	10250425	10063752		4722007	4719923	17367796	16886536	10731022	10238765		Sonchuside?D [ C21 H30 O8, tgt=60.51, overall=60.51 ]	(412.06424, 135992.48)(413.20187, 30624.139)(413.34833, 27049.307)(414.20453, 2921.8452)(393.5017, 121787.13)(394.1855, 37448.35)(395.19183, 12251.199)(413.20764, 62296.016)(414.2103, 8509.6455)(415.2179, 2959.96)(395.19818, 560098.1)(396.20135, 110512.336)(397.20337, 16621.703)(398.20505, 1891.36)(428.7262, 2270.75)(431.2382, 1133.64)(414.22556, 3579.875)(434.52005, 3303.7634)(419.18262, 115113.…
Arbutifolin	Sesquiterpene lactones	1324492	1359838	899563	1632846	1300510	1269012		1866209	1884720	538718	512948	1198616	1092739		Arbutifolin [ C20 H28 O5, tgt=71.81, overall=71.81 ]	(351.20483, 1672.85)(331.18265, 73420.96)(332.18546, 9597.23)(351.20718, 5359.893)(333.19873, 394378.6)(334.20093, 83439.07)(374.1929, 3773.1602)(356.84875, 34563.875)(358.18555, 4176.741)
Campesteryl ferulate	Sesquiterpene lactones	4382883	4509245	1	873327	839365	2851553		949510	1316719	1745482	2706077	828992	855951		Campesteryl ferulate [ C38 H56 O5, tgt=60.70, overall=60.70 ]	(574.3993, 16565.348)(575.4011, 1891.885)(594.4316, 2017.12)(610.6141, 68946.35)(611.61676, 18652.072)(612.4502, 222.39)(593.4343, 14810.192)(594.4338, 7316.42)(616.1376, 35560.637)(616.45416, 14309.334)(617.46497, 1933.0245)(599.2241, 32648.152)(600.22766, 15961.831)(601.0989, 15327.094)(602.0808, 11735.847)(602.4145, 1850.61)
melampolide	Sesquiterpene lactones	2474850	2601097	2487343	2552055	2620142	2634943		2974942	2970655	2438943	2588978	2679689	2639392		melampolide [ C15 H18 O5, tgt=59.37, overall=59.37 ]	(279.1158, 23141.7)(280.1189, 13463.233)(261.106, 66819.58)(262.10892, 5772.685)(281.13113, 7969.988)(282.13474, 1335.2084)(263.12067, 797.6549)
prenantheside A	Sesquiterpene lactones	3196328	3234412	6118424	6072121	6410947	6439593		9440571	5101477	8977225	8625100	3647935	3447884		prenantheside A [ C21 H30 O9, tgt=91.22, overall=91.22 ]	(427.5873, 28740.45)(428.59454, 22555.29)(429.60263, 15265.317)(430.20444, 2104.9968)(408.5477, 61219.875)(410.05435, 20066.148)(411.19196, 53941.46)(412.19458, 8186.0234)(429.20084, 29714.861)(430.20422, 3973.1687)(431.21173, 2085.974)(411.19244, 638108.2)(412.19568, 127365.59)(413.1963, 31749.025)(414.1984, 2449.4978)(449.1787, 1205.645)(433.3729, 4176.414)(435.1742, 276.09)
8alpha-(3,4-dihydroxy-2-methylene-butanoyloxy)-dehydromelitensin	Sesquiterpene lactones	307461	1	1	1	3517609	1		1320680	920257	1438150	1444418	1	1		8alpha-(3,4-dihydroxy-2-methylene-butanoyloxy)-dehydromelitensin [ C20 H28 O7, tgt=37.06, overall=37.06 ]	(381.58804, 17806.965)(383.19458, 5416.1196)(385.1991, 396.59)(367.18195, 733.33496)(384.2007, 5787.14)(385.1987, 1129.11)(366.52402, 1060.3301)(398.2172, 68480.34)(399.2176, 8181.28)(383.66898, 3123.1846)(385.01688, 523.967)(404.0057, 567.11163)(389.17172, 40438.96)(390.17456, 5113.3525)
Parthenin	Sesquiterpene lactones	812789	756726	983110	1016447	563308	541785		1619750	1595476	6492910	6358180	497143	494158		Parthenin [ C15 H18 O4, tgt=94.31, overall=94.31 ]	(264.62653, 691.69995)(263.12778, 15684.95)(264.1316, 2970.9448)(247.12457, 4088.9453)(289.12115, 66635.98)(290.12405, 5166.688)(268.32346, 2421212.2)(269.10358, 391250.47)(270.10522, 46583.24)(271.1071, 2486.6184)
Zexbrevin-B	Sesquiterpene lactones	2019253	2147767	8589866	2340806	2140208	2152296		2167944	2333429	5676533	4686333	2160163	2152628		Zexbrevin-B [ C19 H24 O7, tgt=63.20, overall=63.20 ]	(366.15833, 781.64)(346.1448, 4342.35)(370.168, 20949.81)(347.1516, 12482.878)(348.15332, 685.86)(390.84225, 57321.04)(392.15463, 10248.345)(372.6398, 145609.67)(373.64047, 16671.213)
hierapolitanins A	Sesquiterpene lactones	6116536	5765442	1	12617573	12650205	4160537		9993527	10011105	13354442	14039743	12585905	11913723		hierapolitanins A [ C19 H24 O6, tgt=71.17, overall=71.17 ]	(349.6624, 3532.535)(351.17188, 463.15002)(331.1561, 5178.8)(375.15488, 19041.15)(376.15906, 2247.9265)(357.1468, 577816.94)(358.14972, 79754.78)
Physcion/Parietin	Sesquiterpene lactones	81706	568594	809283	796119	499545	821942		789687	761458	296852	1077557	487985	489633		Physcion/Parietin [ C16 H12 O5, tgt=60.85, overall=60.85 ]	(288.5266, 1586.2021)(271.07022, 2431.934)(289.08502, 62743.688)(290.08777, 5606.11)(270.0743, 1157.61)(305.1132, 3484.212)(307.11646, 857.74)(284.29413, 42469.17)(285.3467, 4216.804)(286.59375, 1675.24)(308.39572, 1375.9901)(290.8701, 34891.652)(291.0515, 6630.97)
hierapolitanins B	Sesquiterpene lactones	2506600	2651576	4840312	4329024	4280887	4393487		5183801	1	7184611	7153778	4111187	4020920		hierapolitanins B [ C21 H26 O8, tgt=75.78, overall=75.78 ]	(406.33353, 7525.473)(407.1715, 2013.43)(390.571, 3261.464)(392.16074, 1104.8818)(409.17734, 491675.28)(410.18015, 89183.46)(389.165, 5307.36)(425.20377, 2559.9265)(415.1504, 48978.348)(416.15308, 9935.838)
Zexbrevin-A	Sesquiterpene lactones	40975296	100547304	57350488	56563496	116075296	59858748		101905456	102710736	119581280	117052488	65179712	64054192		Zexbrevin-A [ C19 H26 O6, tgt=64.53, overall=64.53 ]	(350.53452, 30698.07)(351.17093, 10761.042)(333.16068, 397.4725)(353.1871, 8682.42)(354.18967, 837.15)(376.39258, 23320.926)(378.1742, 3448.9263)(358.9006, 168847.58)(359.8307, 17263.57)
IxerinaD	Sesquiterpene lactones	3196328	3234412	6118424	6072121	6410947	6439593		9440571	5101477	8977225	8625100	3647935	3447884		IxerinaD [ C21 H30 O9, tgt=91.22, overall=91.22 ]	(427.5873, 28740.45)(428.59454, 22555.29)(429.60263, 15265.317)(430.20444, 2104.9968)(408.5477, 61219.875)(410.05435, 20066.148)(411.19196, 53941.46)(412.19458, 8186.0234)(429.20084, 29714.861)(430.20422, 3973.1687)(431.21173, 2085.974)(411.19244, 638108.2)(412.19568, 127365.59)(413.1963, 31749.025)(414.1984, 2449.4978)(449.1787, 1205.645)(433.3729, 4176.414)(435.1742, 276.09)
2beta-Hydroxyepiligustrin	Sesquiterpene lactones	812789	756726	983110	1016447	563308	541785		1619750	1595476	6492910	6358180	497143	494158		2beta-Hydroxyepiligustrin [ C15 H18 O4, tgt=94.31, overall=94.31 ]	(264.62653, 691.69995)(263.12778, 15684.95)(264.1316, 2970.9448)(247.12457, 4088.9453)(289.12115, 66635.98)(290.12405, 5166.688)(268.32346, 2421212.2)(269.10358, 391250.47)(270.10522, 46583.24)(271.1071, 2486.6184)
acetyl solstitialin	Sesquiterpene lactones	10503505	10809947	2013618	2002017	19936498	17735252		2263210	2318158	4928295	4772589	2664789	2088899		acetyl solstitialin [ C17 H22 O6, tgt=53.48, overall=53.48 ]	(304.13434, 21858.678)(305.14755, 3504.47)(348.50748, 17504.988)(349.04944, 1025.7727)(330.55817, 127562.14)(331.56033, 12068.23)
4beta,15-dihydro-3-dehydrosolstitialin A monoacetate	Sesquiterpene lactones	10503505	10809947	2013618	2002017	19936498	17735252		2263210	2318158	4928295	4772589	2664789	2088899		4beta,15-dihydro-3-dehydrosolstitialin A monoacetate [ C17 H22 O6, tgt=53.48, overall=53.48 ]	(304.13434, 21858.678)(305.14755, 3504.47)(348.50748, 17504.988)(349.04944, 1025.7727)(330.55817, 127562.14)(331.56033, 12068.23)
epicatechina-3-O-gallate	Sesquiterpene lactones	1	1	1	1	1	1		1	1	107277	1	1	1		epicatechina-3-O-gallate [ C22 H18 O10, tgt= ]	(425.3713, 8603.773)(426.08707, 1678.0801)(427.08344, 698.8)(426.08893, 3091.2349)(426.0874, 560.91)(460.62347, 1086.62)(442.1113, 24487.16)(453.0902, 296.42)
dihydropicridin	Sesquiterpene lactones	1627154	1640949	1436995	1440648	1311022	1272515		1676923	1684962	1649171	1679793	1307619	1273653		dihydropicridin [ C15 H20 O4, tgt=60.82, overall=60.82 ]	(247.12675, 49186.812)(248.1299, 3945.8254)(267.15207, 631.1909)
11beta,13-dihydro-glucozaluzanin C	Sesquiterpene lactones	1	1	7901237	7764548	10250425	10063752		4722007	4719923	17367796	16886536	10731022	10238765		11beta,13-dihydro-glucozaluzanin C [ C21H30O8, tgt= ]	(412.19836, 26775.389)(413.35675, 11119.697)(413.40692, 23566.469)(393.40753, 128493.914)(394.1855, 37448.35)(395.19183, 12251.199)(413.20764, 62296.016)(414.2103, 8509.6455)(415.2179, 2959.96)(395.19818, 560098.1)(396.20135, 110512.336)(397.20337, 16621.703)(398.20505, 1891.36)(428.223, 345.67667)(414.22556, 3579.875)(435.18658, 4204.4453)(419.18262, 115113.84)(420.1854, 14381.638)
tarassacoside	Sesquiterpene lactones	669868	697474	884052	877642	686142	686417		385525	377923	209967	750554	664863	653303		tarassacoside [ C18 H22 O10, tgt=93.94, overall=93.94 ]	(399.11978, 2589.36)(401.134, 11246.48)(381.10904, 8776.714)(382.11206, 1378.0725)(383.124, 16422.57)(400.58606, 59026.47)(401.80453, 11256.551)(403.13876, 18733.852)(404.13763, 1048.8201)(383.12473, 108916.41)(384.12732, 13371.747)(417.32913, 6843.603)(400.65134, 503196.75)(401.8469, 98308.7)(403.15588, 12900.335)(423.1186, 1088.5443)
Sonchuside?H	Sesquiterpene lactones	493451	494695	866483	850248	1298055	620814		1720089	1713996	3915244	3766432	1137890	1258516		Sonchuside?H [ C20 H26 O6, tgt=68.33, overall=68.33 ]	(363.17447, 543.252)(347.63358, 4355.796)(345.1662, 2480.59)(348.17624, 15592.828)(350.18042, 2144.82)(384.21616, 1664.965)(385.2171, 332.608)(366.20566, 649.4175)(389.17062, 15008.605)(390.1746, 2836.4814)(371.16165, 324070.34)(372.16464, 46325.52)
8-Deoxy-9-O-acetylanthemolide B	Sesquiterpene lactones	10007731	9815026	12077956	3071178	14569120	14629437		10581243	2177760	12374919	12858440	13964771	13928093		8-Deoxy-9-O-acetylanthemolide B [ C17 H22 O7, tgt=92.37, overall=92.37 ]	(339.13495, 5697.8945)(321.125, 4978.29)(341.15097, 9250.715)(342.1474, 11659.28)(323.99878, 1564.193)(356.17093, 563306.8)(357.17316, 87824.69)(358.1769, 8586.963)(341.07535, 2864.1228)(361.1255, 7469.9985)(346.9245, 40153.418)(348.12863, 4207.2754)
(6R,7R,8S,3R) 8alpha-(3,4-dihydroxy-2-methylene-butanoyloxy)-15-acetoxy-helianga 1(10), 4(5), 11(13) trien-6-olide	Sesquiterpene lactones	619980	660677	4850101	4804847	1342505	4599436		46309152	46817052	21215512	21989748	4567580	1272614		(6R,7R,8S,3R) 8alpha-(3,4-dihydroxy-2-methylene-butanoyloxy)-15-acetoxy-helianga 1(10), 4(5), 11(13) trien-6-olide [ C22 H29 O8, tgt=56.45, overall=56.45 ]	(422.6891, 2615.775)(404.84677, 268.31332)(424.5341, 1795.555)(425.2066, 2039.305)(439.2219, 84955.72)(440.22626, 31411.996)(421.21378, 2521612.0)(422.21716, 548585.94)(423.22125, 93202.6)(424.22394, 8168.758)(431.17834, 25567.434)
Stizolin	Sesquiterpene lactones	1627154	1640949	1436995	1440648	1311022	1272515		1676923	1684962	1649171	1679793	1307619	1273653		Stizolin [ C15 H20 O4, tgt=60.82, overall=60.82 ]	(247.12675, 49186.812)(248.1299, 3945.8254)(267.15207, 631.1909)
Alatolide	Sesquiterpene lactones	40975296	100547304	57350488	56563496	116075296	59858748		101905456	102710736	119581280	117052488	65179712	64054192		Alatolide [ C19 H26 O6, tgt=64.53, overall=64.53 ]	(350.53452, 30698.07)(351.17093, 10761.042)(333.16068, 397.4725)(353.1871, 8682.42)(354.18967, 837.15)(376.39258, 23320.926)(378.1742, 3448.9263)(358.9006, 168847.58)(359.8307, 17263.57)
Floribundin	Sesquiterpene lactones	1627154	1640949	1436995	1440648	1311022	1272515		1676923	1684962	1649171	1679793	1307619	1273653		Floribundin [ C15 H20 O4, tgt=60.82, overall=60.82 ]	(247.12675, 49186.812)(248.1299, 3945.8254)(267.15207, 631.1909)
napiferoside	Sesquiterpene lactones	3196328	3234412	6118424	6072121	6410947	6439593		9440571	5101477	8977225	8625100	3647935	3447884		napiferoside [ C21 H30 O9, tgt=91.22, overall=91.22 ]	(427.5873, 28740.45)(428.59454, 22555.29)(429.60263, 15265.317)(430.20444, 2104.9968)(408.5477, 61219.875)(410.05435, 20066.148)(411.19196, 53941.46)(412.19458, 8186.0234)(429.20084, 29714.861)(430.20422, 3973.1687)(431.21173, 2085.974)(411.19244, 638108.2)(412.19568, 127365.59)(413.1963, 31749.025)(414.1984, 2449.4978)(449.1787, 1205.645)(433.3729, 4176.414)(435.1742, 276.09)
Picriside?B	Sesquiterpene lactones	1216717	24964810	7901237	7764548	10250425	10063752		4722007	4719923	17367796	16886536	10731022	10238765		Picriside?B [ C21 H30 O8, tgt=60.51, overall=60.51 ]	(412.06424, 135992.48)(413.20187, 30624.139)(413.34833, 27049.307)(414.20453, 2921.8452)(393.5017, 121787.13)(394.1855, 37448.35)(395.19183, 12251.199)(413.20764, 62296.016)(414.2103, 8509.6455)(415.2179, 2959.96)(395.19818, 560098.1)(396.20135, 110512.336)(397.20337, 16621.703)(398.20505, 1891.36)(428.7262, 2270.75)(431.2382, 1133.64)(414.22556, 3579.875)(434.52005, 3303.7634)(419.18262, 115113.…
15-O-beta-D-glucopyranosyl-11beta,13-dihydrpourospermal A	Sesquiterpene lactones	1883646	1798740	2881081	4231019	3438982	3085844		2737952	2854115	44728480	45626180	3254071	3138694		15-O-beta-D-glucopyranosyl-11beta,13-dihydrpourospermal A [ C21 H30 O10, tgt=80.53, overall=80.53 ]	(444.65945, 7250.982)(445.30652, 4850.3257)(446.19846, 566.61163)(425.1718, 758393.75)(426.17462, 140788.73)(427.18433, 105861.03)(428.1872, 12090.205)(445.19498, 8440.644)(427.1866, 199599.73)(428.18964, 32299.338)(429.1969, 22568.682)(430.19763, 1741.0349)(460.21445, 247.37572)(442.2048, 2054.7449)(466.5108, 4310.2026)(447.82773, 10724.437)(448.1587, 4550.42)(449.1606, 313.15)
Ligulatin C	Sesquiterpene lactones	40975296	100547304	57350488	56563496	116075296	59858748		101905456	102710736	119581280	117052488	65179712	64054192		Ligulatin C [ C19 H26 O6, tgt=64.53, overall=64.53 ]	(350.53452, 30698.07)(351.17093, 10761.042)(333.16068, 397.4725)(353.1871, 8682.42)(354.18967, 837.15)(376.39258, 23320.926)(378.1742, 3448.9263)(358.9006, 168847.58)(359.8307, 17263.57)
9alpha-Hydroxycumambrin A	Sesquiterpene lactones	10503505	10809947	2013618	2002017	19936498	17735252		2263210	2318158	4928295	4772589	2664789	2088899		9alpha-Hydroxycumambrin A [ C17 H22 O6, tgt=53.48, overall=53.48 ]	(304.13434, 21858.678)(305.14755, 3504.47)(348.50748, 17504.988)(349.04944, 1025.7727)(330.55817, 127562.14)(331.56033, 12068.23)
Erioflorin methacrylate	Sesquiterpene lactones	1225816	1242395	3147758	1465793	1270354	1245014		642931	653320	6271184	3836570	1659556	1218048		Erioflorin methacrylate [ C23 H28 O7, tgt=61.44, overall=61.44 ]	(416.1887, 8212.575)(401.51334, 2949.5498)(418.5288, 1423.5166)(437.22842, 42513.13)(438.23126, 5378.651)(439.23083, 1022.49493)(416.20798, 20163.502)(417.21054, 1881.1074)(443.18115, 33071.836)(444.18457, 4501.7563)(445.194, 7515.5146)(425.16895, 10685.916)
8-O-Angeloyl-9-O-acetylanthemolide B	Sesquiterpene lactones	9602260	9832941	14221973	13887864	16751036	16589806		3571919	3586272	15427614	15180497	16490047	16036795		8-O-Angeloyl-9-O-acetylanthemolide B [ C22 H28 O9, tgt=83.06, overall=83.06 ]	(438.85037, 12347.763)(439.51733, 378.85)(439.1839, 11052.89)(418.71228, 9990.881)(420.17236, 4658.4517)(421.16827, 1912.074)(438.61505, 344606.03)(439.52283, 95119.195)(439.1927, 36273.43)(440.19464, 2392.7852)(420.17285, 9290.923)(420.17178, 3859.3835)(421.1677, 1088.9434)(455.2152, 5922.4243)(460.35992, 249083.17)(460.159, 64082.64)(461.16153, 13064.423)(462.1632, 857.86)(441.43448, 34300.2)(4…
methyl 8alpha-O-((4-acetoxy-3-hydroxy-2-methylenebutanoyl)oxy)-6beta,15-dihydroxyelema-1,3,11(13)-trien- 12-oate	Sesquiterpene lactones	1	1	1285583	989017	1156672	671654		2043384	42362624	2361109	72975792	1	591752		methyl 8alpha-O-((4-acetoxy-3-hydroxy-2-methylenebutanoyl)oxy)-6beta,15-dihydroxyelema-1,3,11(13)-trien- 12-oate [ C21 H33 O8, tgt=50.53, overall=50.53 ]	(415.22122, 5301.3574)(416.72937, 2527.68)(415.55823, 55831.49)(416.22626, 9248.5)(417.2307, 3399.06)(431.24933, 119900.83)(432.25214, 25639.152)(433.25797, 3271.5835)(436.6101, 1219.399)
Hydruntinolide A	Sesquiterpene lactones	2019253	2147767	8589866	2340806	2140208	2152296		2167944	2333429	5676533	4686333	2160163	2152628		Hydruntinolide A [ C19 H24 O7, tgt=63.20, overall=63.20 ]	(366.15833, 781.64)(346.1448, 4342.35)(370.168, 20949.81)(347.1516, 12482.878)(348.15332, 685.86)(390.84225, 57321.04)(392.15463, 10248.345)(372.6398, 145609.67)(373.64047, 16671.213)
Hydruntinolide B	Sesquiterpene lactones	495522	526969	199608	196747	253955	1		317290	318593	1432069	1421815	225525	225619		Hydruntinolide B [ C23 H30 O9, tgt=49.69, overall=49.69 ]	(451.68997, 15122.963)(452.18912, 1889.0734)(453.20178, 34587.637)(454.20474, 4474.096)(436.68683, 1381972.8)(438.191, 378855.66)(453.1986, 265.62)(455.2132, 266.53)(434.19513, 8345.04)(455.26788, 36820.426)(456.4801, 9597.0)(460.17865, 5447.64)(461.188, 10504.265)
Chlorohyssopifolin?D	Sesquiterpene lactones	1437859	1506033	1326051	1270973	1363996	1353256		9345222	9856988	8634190	7486399	1229449	1199729		Chlorohyssopifolin?D [ C21 H29 Cl O8, tgt=58.86, overall=58.86 ]	(445.95444, 8086.7407)(446.15695, 974.29004)(447.1539, 476.22)(429.1452, 112765.52)(430.1479, 17987.66)(447.15677, 4918.567)(449.66602, 926.8925)(428.14908, 54296.83)(429.15253, 9005.607)(431.2856, 39670.695)(432.28815, 5698.407)(433.16458, 456.53665)(469.1954, 18910.096)(448.55862, 3029.0615)(448.1756, 1250.25)(467.545, 45082.93)(468.5478, 7705.211)(469.15, 4727.335)(452.7413, 6618.9834)
Vernodalol	Sesquiterpene lactones	8523953	8961152	15364424	14697431	9921357	9730903		12835655	13036689	22808116	21376308	10385127	9712040		Vernodalol [ C20 H24 O8, tgt=96.94, overall=96.94 ]	(393.74847, 1041.7839)(395.15778, 986.06995)(374.95663, 6016.6123)(375.14157, 598.9825)(395.15872, 856.2933)(375.1489, 12382.58)(410.268, 307637.5)(411.2756, 120911.72)(412.188, 13148.442)(416.54083, 8922.644)(416.93906, 1799.8939)(401.13376, 12835.638)(402.1367, 1914.735)
Chlorohyssopifolin?E	Sesquiterpene lactones	585408	643642	1384367	848356	1203825	2591999		2877741	777404	4190255	2917394	2710130	2247271		Chlorohyssopifolin?E [ C19 H25 Cl O8, tgt=48.69, overall=48.69 ]	(419.83942, 10586.112)(419.12787, 2234.4375)(419.1252, 374.27)(399.11856, 1721.4016)(419.13788, 8908.1)(418.1387, 1476.14)(399.95554, 31984.533)(400.12442, 8893.66)(401.1188, 8490.61)(440.1149, 16608.322)(418.06042, 6150.041)(420.48447, 2463.2234)(423.1523, 266.08)(439.9356, 48604.35)(442.44507, 5235.744)(441.1232, 593.91)(425.91022, 1825.4401)
Chlorohyssopifolin?A	Sesquiterpene lactones	122096	123114	226301	236307	226794	190190		219337	214940	89646	120794	222918	188597		Chlorohyssopifolin?A [ C19 H24 Cl2 O7, tgt=53.01, overall=53.01 ]	(435.75516, 2020.2516)(438.42355, 8703.161)(441.5943, 6395.1978)(442.096, 1077.53)(421.57877, 7164.189)(437.0893, 3998.3352)(442.09613, 2594.8774)(455.45883, 31655.135)(456.59366, 15933.372)(458.12637, 4583.235)(458.1297, 565.8)(438.6156, 2510.5112)(459.08325, 14279.226)(464.08203, 6057.6396)(441.0636, 78234.76)(442.06616, 9585.446)(443.0666, 757.95996)
Cnicin	Sesquiterpene lactones	10928652	2383856	4382195	3649203	3137228	3011011		4488611	5119087	14784239	14300865	2469196	2336426		Cnicin [ C20 H26 O7, tgt=62.92, overall=62.92 ]	(381.1811, 2564.015)(360.162, 3847.54)(363.1758, 1930.94)(396.2018, 575488.44)(397.20355, 82885.3)(398.2051, 6529.451)(404.76425, 34087.57)(402.1539, 18914.76)(403.1553, 2244.38)(387.15582, 108096.88)(388.1593, 15280.001)
8alpha-O-(4-acetoxy-5-hydroxyangeloyl)-11beta,13-dihydrocnicin	Sesquiterpene lactones	6872802	7052332	4330844	3887246	2510381	2467494		11671078	11823837	4956857	4772102	2440557	3816245		8alpha-O-(4-acetoxy-5-hydroxyangeloyl)-11beta,13-dihydrocnicin [ C22 H30 O9, tgt=75.33, overall=75.33 ]	(433.65213, 195017.61)(437.99503, 34469.26)(440.41782, 2411.55)(415.51138, 1919.1967)(423.19055, 1772.285)(441.2014, 28918.26)(442.2044, 2301.89)(406.1996, 569.05)(444.98264, 709.64996)(442.2312, 342.36)(427.22144, 228265.58)(423.22125, 95541.36)(424.22394, 8478.863)(463.1791, 334.53)(429.40198, 65543.48)(432.1845, 9854.872)
Autumnolide	Sesquiterpene lactones	278033	253000	507513	423101	255049	247417		1257298	1242682	5059106	4943867	243828	302304		Autumnolide [ C15 H20 O5, tgt=68.94, overall=68.94 ]	(280.73242, 5089.9614)(263.12155, 56577.582)(264.12448, 4865.048)(283.1456, 236.28)(263.12778, 19793.23)(264.1316, 3768.29)(289.1212, 107936.484)(290.12436, 11072.636)
Solstitialin A	Sesquiterpene lactones	278033	253000	507513	423101	255049	247417		1257298	1242682	5059106	4943867	243828	302304		Solstitialin A [ C15 H20 O5, tgt=68.94, overall=68.94 ]	(280.73242, 5089.9614)(263.12155, 56577.582)(264.12448, 4865.048)(283.1456, 236.28)(263.12778, 19793.23)(264.1316, 3768.29)(289.1212, 107936.484)(290.12436, 11072.636)
Britannin	Sesquiterpene lactones	5486292	5236100	10081673	15365142	7365334	7163332		8855952	8874364	43043108	54854784	6954494	20261384		Britannin [ C19 H26 O7, tgt=52.50, overall=52.50 ]	(368.67645, 1823.4426)(348.15576, 6203.7974)(369.18158, 937.88)(351.169, 205.98)(385.2106, 148.77)(389.2098, 670.53)(366.1953, 320.27)(390.21204, 35728.547)(391.33725, 4809.965)(391.14938, 9617.043)(392.1609, 1079.11)(373.534, 17979.771)(375.0894, 1854.9246)
leucodin	Sesquiterpene lactones	1627154	1640949	1	1	1	1		1676923	1684962	1649171	1679793	1	1		leucodin [ C15 H18 O3, tgt=60.82, overall=60.82 ]	(247.12679, 51536.113)(248.12999, 4136.6562)(266.1686, 2539.74)
methyl lactucopicrinoate	Sesquiterpene lactones	3396647	8630070	5857383	5277752	4524980	1		1846983	1765954	4598122	4296392	1	4248938		methyl lactucopicrinoate [ C25 H26 O9, tgt=49.66, overall=49.66 ]	(470.16284, 7051.7866)(452.15253, 2408.5874)(475.18036, 629.595)(456.02982, 40093.914)(456.41394, 10808.578)(457.88248, 3681.2559)(488.19073, 1315.765)(473.18927, 9004.485)(474.19397, 748.4263)(475.1875, 80.05)(497.66092, 5045.717)(495.40433, 2319.86)(478.03412, 7396.184)(478.81076, 1861.8267)(479.145, 8652.355)
11,13beta-dihydro-14-hydroxyhypocretenolide	Sesquiterpene lactones	812789	756726	983110	1016447	563308	541785		1619750	1595476	6492910	6358180	497143	494158		11,13beta-dihydro-14-hydroxyhypocretenolide [ C15 H18 O4, tgt=94.31, overall=94.31 ]	(264.62653, 691.69995)(263.12778, 15684.95)(264.1316, 2970.9448)(247.12457, 4088.9453)(289.12115, 66635.98)(290.12405, 5166.688)(268.32346, 2421212.2)(269.10358, 391250.47)(270.10522, 46583.24)(271.1071, 2486.6184)
19-deoxyjanerin	Sesquiterpene lactones	15548034	15434876	12159829	12046629	18688950	14178211		21926798	14771271	30469404	25315994	13918347	13465924		19-deoxyjanerin [ C19 H22 O6, tgt=72.72, overall=72.72 ]	(373.13974, 149952.75)(374.14258, 16693.352)(333.1453, 766.86005)(347.1483, 3180.923)(369.1836, 153.43)(347.15222, 7426.9536)(355.13034, 226194.64)(356.1339, 40285.69)(349.1773, 23166.271)(350.1805, 2135.697)(351.1823, 740.4)
Jacquilenin	Sesquiterpene lactones	812789	756726	983110	1016447	563308	541785		1619750	1595476	6492910	6358180	497143	494158		Jacquilenin [ C15 H18 O4, tgt=94.31, overall=94.31 ]	(264.62653, 691.69995)(263.12778, 15684.95)(264.1316, 2970.9448)(247.12457, 4088.9453)(289.12115, 66635.98)(290.12405, 5166.688)(268.32346, 2421212.2)(269.10358, 391250.47)(270.10522, 46583.24)(271.1071, 2486.6184)
11,13-di-idrolattucina	Sesquiterpene lactones	2474850	2601097	2487343	2552055	2620142	2634943		2974942	2970655	2438943	2588978	2679689	2639392		11,13-di-idrolattucina [ C15 H18 O5, tgt=59.37, overall=59.37 ]	(279.1158, 23141.7)(280.1189, 13463.233)(261.106, 66819.58)(262.10892, 5772.685)(281.13113, 7969.988)(282.13474, 1335.2084)(263.12067, 797.6549)
Fastigilin C	Sesquiterpene lactones	1011949	855914	1862470	1952552	1207690	1194215		2033892	1534781	2654849	2606973	1208505	920631		Fastigilin C [ C20 H24 O6, tgt=60.18, overall=60.18 ]	(360.16086, 1796.3539)(347.1603, 3747.377)(345.66217, 5990.43)(348.1645, 1104.49)(378.1862, 146.1)(387.10553, 100240.61)(388.09973, 13935.4795)(369.14526, 55684.457)(370.14957, 12205.457)
Fastigilin B	Sesquiterpene lactones	493451	494695	866483	850248	1298055	620814		1720089	1713996	3915244	3766432	1137890	1258516		Fastigilin B [ C20 H26 O6, tgt=68.33, overall=68.33 ]	(363.17447, 543.252)(347.63358, 4355.796)(345.1662, 2480.59)(348.17624, 15592.828)(350.18042, 2144.82)(384.21616, 1664.965)(385.2171, 332.608)(366.20566, 649.4175)(389.17062, 15008.605)(390.1746, 2836.4814)(371.16165, 324070.34)(372.16464, 46325.52)
11beta,13-dihydro 19-desoxycin	Sesquiterpene lactones	276625	274045	395072	433461	388689	405371		310922	317542	405766	399045	348732	309101		11beta,13-dihydro 19-desoxycin [ C20 H28 O6, tgt=81.68, overall=81.68 ]	(366.2045, 2954.41)(385.22897, 78368.48)(386.23172, 13626.819)(387.23663, 2043.95)(364.21265, 213.955)(391.18683, 793.942)(373.17493, 4429.27)(374.18054, 560.44)
aguerin B	Sesquiterpene lactones	15548034	15434876	12159829	12046629	18688950	14178211		21926798	14771271	30469404	25315994	13918347	13465924		aguerin B [ C19 H22 O6, tgt=72.72, overall=72.72 ]	(373.13974, 149952.75)(374.14258, 16693.352)(333.1453, 766.86005)(347.1483, 3180.923)(369.1836, 153.43)(347.15222, 7426.9536)(355.13034, 226194.64)(356.1339, 40285.69)(349.1773, 23166.271)(350.1805, 2135.697)(351.1823, 740.4)
Gradolide	Sesquiterpene lactones	172026	308277	665056	1	157625	160713		190628	198477	529088	512881	149920	1		Gradolide [ C25 H34 O7, tgt=68.73, overall=68.73 ]	(431.34167, 9154.419)(433.56827, 4378.5234)(447.24298, 23858.842)(448.24585, 4527.5703)(449.2573, 555.53503)(431.23526, 2794.1233)(432.7371, 283.21)(464.2623, 11885.722)(465.2665, 1029.326)(446.25116, 1113.48)(473.22583, 8947.43)(475.2425, 384.88)(454.0704, 14105.172)(455.07422, 348.24713)(457.22974, 6021.248)
15-nor-guaianolide	Sesquiterpene lactones	939799	1	1216176	1195920	1000894	1044919		697175	1221254	336458	950424	978043	1014116		15-nor-guaianolide [ C14 H18 O4, tgt=62.10, overall=62.10 ]	(251.12183, 121784.086)(252.1248, 10488.205)(253.12785, 1395.04)(232.1093, 1368.79)(233.1094, 196.62)(235.12642, 1867.916)(250.14537, 715.73145)(258.1063, 55281.34)(259.1125, 2999.38)
mexicanin A	Sesquiterpene lactones	812789	756726	983110	1016447	563308	541785		1619750	1595476	6492910	6358180	497143	494158		mexicanin A [ C15 H18 O4, tgt=94.31, overall=94.31 ]	(264.62653, 691.69995)(263.12778, 15684.95)(264.1316, 2970.9448)(247.12457, 4088.9453)(289.12115, 66635.98)(290.12405, 5166.688)(268.32346, 2421212.2)(269.10358, 391250.47)(270.10522, 46583.24)(271.1071, 2486.6184)
Hiyodorilactone?A/ Eucannabinolide	Sesquiterpene lactones	18740056	18558220	31810936	4973575	25921776	3484765		4974747	4871877	5319012	6254609	26179346	3473389		Hiyodorilactone?A/ Eucannabinolide [ C22 H28 O8, tgt=43.87, overall=43.87 ]	(420.17682, 6616.9526)(421.17334, 1484.5782)(402.1726, 4082.9302)(404.84644, 1770.23)(446.7129, 8912.637)(448.17722, 1305.7001)(427.99673, 174304.97)(428.99905, 24505.08)
Multiradiatin	Sesquiterpene lactones	1608781	3661482	6417694	5961981	2745040	2684902		9387009	8628486	16558319	16354932	2779173	2645328		Multiradiatin [ C20 H22 O6, tgt=55.27, overall=55.27 ]	(362.48703, 3564.4736)(360.1432, 315.18)(344.8928, 6673.791)(345.1445, 7596.3)(359.1529, 2447.64)(377.5132, 2054.0598)(378.1865, 226.73502)(361.1762, 10552.24)(362.17953, 5320.489)(363.17908, 972.23)(385.1404, 56539.973)(386.1433, 6258.8696)(367.1299, 22842.88)(368.13184, 5638.891)
mexicanin I	Sesquiterpene lactones	812789	756726	983110	1016447	563308	541785		1619750	1595476	6492910	6358180	497143	494158		mexicanin I [ C15 H18 O4, tgt=94.31, overall=94.31 ]	(264.62653, 691.69995)(263.12778, 15684.95)(264.1316, 2970.9448)(247.12457, 4088.9453)(289.12115, 66635.98)(290.12405, 5166.688)(268.32346, 2421212.2)(269.10358, 391250.47)(270.10522, 46583.24)(271.1071, 2486.6184)
Nobilin	Sesquiterpene lactones	287834	959403	706038	1144574	1092716	1122347		271538	109988	675914	659561	1077062	1072034		Nobilin [ C20 H26 O5, tgt=55.41, overall=55.41 ]	(348.27347, 9067.437)(348.18008, 438.91202)(329.16772, 10849.776)(330.1697, 670.44)(349.3031, 4394.8877)(350.19656, 2506.355)(331.1831, 9362.916)(332.1852, 922.8733)(350.2112, 1306.56)(372.31888, 54694.223)(373.84497, 8961.978)(354.41467, 28883.605)(355.91913, 615431.8)(356.1713, 387678.28)
mexicanin F	Sesquiterpene lactones	6454936	6647903	12165704	11983235	14098966	14146891		9821976	9355488	22257072	21205848	13524126	13563171		mexicanin F [ C28 H32 O6, tgt=73.41, overall=73.41 ]	(465.2216, 318.4175)(449.22668, 857.905)(482.25146, 11656.956)(483.25403, 1575.0665)(464.24124, 6042.4375)(465.24402, 883.97)(487.20782, 309174.72)(488.2105, 58089.383)(489.21332, 9410.29)(490.21527, 880.40247)(469.19604, 17757.045)(470.19952, 5043.1274)(471.20392, 409.3)
Tagitinin-F	Sesquiterpene lactones	6116536	5765442	1	12617573	12650205	4160537		9993527	10011105	13354442	14039743	12585905	11913723		Tagitinin-F [ C19 H24 O6, tgt=71.17, overall=71.17 ]	(349.6624, 3532.535)(351.17188, 463.15002)(331.1561, 5178.8)(375.15488, 19041.15)(376.15906, 2247.9265)(357.1468, 577816.94)(358.14972, 79754.78)
8alpha-O-(4-acetoxy-3-hydroxy-2-methylenebutanoyloxy)-sonchucarpolide	Sesquiterpene lactones	307461	1	1	1	3517609	1		1320680	920257	1438150	1444418	1	1		8alpha-O-(4-acetoxy-3-hydroxy-2-methylenebutanoyloxy)-sonchucarpolide [ C20 H28 O7, tgt=37.06, overall=37.06 ]	(381.58804, 17806.965)(383.19458, 5416.1196)(385.1991, 396.59)(367.18195, 733.33496)(384.2007, 5787.14)(385.1987, 1129.11)(366.52402, 1060.3301)(398.2172, 68480.34)(399.2176, 8181.28)(383.66898, 3123.1846)(385.01688, 523.967)(404.0057, 567.11163)(389.17172, 40438.96)(390.17456, 5113.3525)
Ixerisoside?E	Sesquiterpene lactones	1	1	1	1	6410947	6439593		9440571	1	1	1	1	1		Ixerisoside?E [ C21H30O9, tgt= ]	(408.17252, 17281.557)(409.1752, 6110.16)(429.1996, 18293.713)(430.20395, 4673.9565)(411.19165, 25870.646)(412.19513, 4218.026)(413.1965, 1129.22)(434.8395, 514.9766)(435.1742, 276.09)
Ixerisoside?L	Sesquiterpene lactones	1	1	120883	120411	152420	160147		1	1	1	398806	159203	155554		Ixerisoside?L [ C36 H52 O15, tgt= ]	(727.339, 3905.645)(728.34174, 765.9567)(729.3547, 4967.52)(727.3401, 3490.69)(728.3429, 655.28)(729.3552, 5135.67)(730.3574, 528.26)(743.37054, 17489.59)(744.37335, 4448.277)(745.3748, 500.28003)(747.3287, 10885.0205)(748.3315, 2141.1802)
epi-Antheindurolide A	Sesquiterpene lactones	1	1	1	1	1	1		1	1	1	1	1	1		epi-Antheindurolide A [ C15H20O4, tgt= ]	(247.12695, 64155.785)(248.13005, 5288.54)
15-hydroxy-tetra-hydrorecynosin	Sesquiterpene lactones	1	1	1	1	795536	847511		1	460812	1	1	847289	823371		15-hydroxy-tetra-hydrorecynosin [ C15H24O4, tgt= ]	(251.15785, 23084.137)(252.16093, 905.98676)(291.1557, 1226.942)
Cebellin N	Sesquiterpene lactones	1	1	1	1	1	1		1	1	1	1	1	1		Cebellin N [ C19H25O5, tgt= ]	(334.17215, 6405.0703)(343.1665, 12548.966)
salignoside	Sesquiterpene lactones	1	1	1	1	6410947	6439593		9440571	1	1	1	1	1		salignoside [ C21H30O9, tgt= ]	(408.17252, 17281.557)(409.1752, 6110.16)(429.1996, 18293.713)(430.20395, 4673.9565)(411.19165, 25870.646)(412.19513, 4218.026)(413.1965, 1129.22)(434.8395, 514.9766)(435.1742, 276.09)
Eupatolide	Sesquiterpene lactones	83583	82520	1	1	359678	345842		107163	103572	1	1	335193	336271		Eupatolide [ C15 H20 O3, tgt=47.61, overall=47.61 ]	(249.14232, 13893.696)(250.14505, 758.2386)(231.13046, 12854.343)(251.15746, 15813.851)(233.14565, 1288.4375)(255.12535, 8154.885)
Desacetyl-beta-cyclopyrethrosin	Sesquiterpene lactones	1	1	1	1	1	1		1676923	1684962	1	1	1307619	1273653		Desacetyl-beta-cyclopyrethrosin [ C15H20O4, tgt= ]	(247.12682, 50976.6)(248.13004, 4096.351)(267.1523, 784.07666)
Youngiaside?B	Sesquiterpene lactones	1	1	1	1	1	1		1	1	1	1	1	1		Youngiaside?B [ C29H34O11, tgt= ]	(564.18805, 21440.336)(565.18854, 8869.018)
Sivasinolide	Sesquiterpene lactones	1	1	1	1	1	1		1	1	1	1	1	1		Sivasinolide [ C15H20O4, tgt= ]	(247.12677, 54004.33)(248.12994, 4513.6836)
Quadrone	Sesquiterpene lactones	83583	82520	1	1	359678	345842		107163	103572	1	1	335193	336271		Quadrone [ C15 H20 O3, tgt=47.61, overall=47.61 ]	(249.14232, 13893.696)(250.14505, 758.2386)(231.13046, 12854.343)(251.15746, 15813.851)(233.14565, 1288.4375)(255.12535, 8154.885)
crepidialanceoside B	Sesquiterpene lactones	414984	428377	731930	751857	377213	367345		627150	615420	1	671323	365507	354679		crepidialanceoside B [ C29 H36 O11, tgt=50.38, overall=50.38 ]	(543.22986, 2935.7476)(565.2067, 28050.812)(566.20844, 2712.549)
Hiyodorilactone?F	Sesquiterpene lactones	352801	463560	2068530	184489	1014870	998779		1694573	1756655	1	911106	1031596	678659		Hiyodorilactone?F [ C24 H30 O9, tgt=48.20, overall=48.20 ]	(462.19324, 2178.2334)(463.20428, 105.524)(444.18362, 3368.5493)(450.80466, 529.7167)(451.20688, 4847.773)(466.7281, 71.9675)(468.23444, 148.625)(489.56104, 1523.63)(491.1891, 54.31)(471.35733, 26345.502)(472.37152, 5297.808)(473.18863, 10345.656)
8alpha-(4?,5?-Diacetoxyangeloyl)sonchucarpolide	Sesquiterpene lactones	307940	318930	178728	178153	4717938	1		522179	512540	1	1186264	4163100	3942326		8alpha-(4?,5?-Diacetoxyangeloyl)sonchucarpolide [ C24 H30 O10, tgt=58.42, overall=58.42 ]	(479.18298, 46273.594)(480.18344, 14714.042)(481.1851, 1165.005)(483.2092, 1324.08)(497.22485, 1306.5299)(479.60834, 279.52603)(502.31714, 29231.783)(503.31958, 4405.727)(505.1789, 2156.3901)(487.71933, 6715.316)(488.17328, 717.2825)(489.1826, 331.79)
Crepidiaside D	Sesquiterpene lactones	414984	428377	731930	751857	377213	367345		627150	615420	1	671323	365507	354679		Crepidiaside D [ C29 H36 O11, tgt=50.38, overall=50.38 ]	(543.22986, 2935.7476)(565.2067, 28050.812)(566.20844, 2712.549)
Crepidiaside E	Sesquiterpene lactones	1	1	1	1	1	1		1	1	1	1	1	1		Crepidiaside E [ C29H34O11, tgt= ]	(564.18805, 21440.336)(565.18854, 8869.018)
Micheliolide	Sesquiterpene lactones	83583	82520	1	1	359678	345842		107163	103572	1	1	335193	336271		Micheliolide [ C15 H20 O3, tgt=47.61, overall=47.61 ]	(249.14232, 13893.696)(250.14505, 758.2386)(231.13046, 12854.343)(251.15746, 15813.851)(233.14565, 1288.4375)(255.12535, 8154.885)
centaurepensin	Sesquiterpene lactones	122096	123114	226301	236307	226794	190190		300494	214940	1	1	222918	188597		centaurepensin [ C19 H24 Cl2 O7, tgt=53.01, overall=53.01 ]	(435.8885, 2166.188)(438.69043, 8995.525)(441.76135, 4674.487)(442.0963, 1018.55)(421.57877, 7164.189)(437.08945, 4174.47)(442.09613, 2422.98)(454.94266, 34458.027)(456.59366, 13423.003)(458.45963, 3752.833)(439.11493, 3194.6814)(457.08487, 2506.192)(441.0636, 78234.76)(442.06616, 9585.446)(443.0666, 757.95996)
Magnolialide	Sesquiterpene lactones	83583	82520	1	1	359678	345842		107163	103572	1	1	335193	336271		Magnolialide [ C15 H20 O3, tgt=47.61, overall=47.61 ]	(249.14232, 13893.696)(250.14505, 758.2386)(231.13046, 12854.343)(251.15746, 15813.851)(233.14565, 1288.4375)(255.12535, 8154.885)
10-Epi-8-Deoxycumambrin	Sesquiterpene lactones	83583	82520	1	1	359678	345842		107163	103572	1	1	335193	336271		10-Epi-8-Deoxycumambrin [ C15 H20 O3, tgt=47.61, overall=47.61 ]	(249.14232, 13893.696)(250.14505, 758.2386)(231.13046, 12854.343)(251.15746, 15813.851)(233.14565, 1288.4375)(255.12535, 8154.885)
Microlenin	Sesquiterpene lactones	2030484	1930586	2878471	2996866	1712913	2378556		2752509	2765636	1	4488694	1577542	2318452		Microlenin [ C29 H34 O7, tgt=60.41, overall=60.41 ]	(495.9988, 60981.31)(497.0014, 16864.414)(497.55048, 10570.139)(498.26724, 1405.4401)
8-O-Tigloyl-9-O-acetylanthemolide B	Sesquiterpene lactones	9602260	9832941	14221973	13887864	16751036	16589806		3571919	3586272	1	1	16490047	16036795		8-O-Tigloyl-9-O-acetylanthemolide B [ C22 H28 O9, tgt=83.06, overall=83.06 ]	(418.88388, 15439.998)(420.17236, 4658.4517)(421.16827, 1912.074)(419.17053, 17982.924)(420.17178, 3859.3835)(421.1677, 1088.9434)(455.2169, 192.62)(465.17325, 852.195)(441.5128, 40309.85)(442.5138, 4989.423)(443.14633, 2831.4644)
carabrol-4-O-palmitate	Sesquiterpene lactones	1	1	66786	223127	1	1		1	1	1	1	423232	418631		carabrol-4-O-palmitate [ C31 H52 O4, tgt= ]	(514.9874, 145365.28)(515.98987, 25988.412)(517.38776, 3159.7659)
Hirsutolide	Sesquiterpene lactones	1	263503	2984462	674429	91155	1		160488	149651	1	961217	84932	89721		Hirsutolide [ C16H20O5, tgt= ]	(292.68832, 7950.7397)(293.8013, 359.02335)(295.14648, 14055.825)(296.14935, 782.076)(277.13602, 290.705)(313.17267, 32681.375)(314.17554, 4143.864)(317.1302, 586.99)(301.12076, 55312.29)(302.1231, 5019.504)
acidop-idrossifenilacetico	Sesquiterpene lactones	1487620	564068	432449	418540	447772	475954		1844118	1289836	1	440988	496148	414111		acidop-idrossifenilacetico [ C8 H8 O3, tgt=65.47, overall=65.47 ]	(153.0495, 4296.455)(137.226, 4570.0864)(139.0499, 676.09)(155.0613, 2856.4534)(138.05304, 931225.25)(139.05563, 109683.234)(140.05763, 8836.747)(171.1737, 4885.581)(171.0774, 490.675)(154.5748, 4334.335)(160.03458, 1494.322)
Pseudoivalin	Sesquiterpene lactones	83583	82520	1	1	359678	345842		107163	103572	1	1	335193	336271		Pseudoivalin [ C15 H20 O3, tgt=47.61, overall=47.61 ]	(249.14232, 13893.696)(250.14505, 758.2386)(231.13046, 12854.343)(251.15746, 15813.851)(233.14565, 1288.4375)(255.12535, 8154.885)
8alpha-Tigloyloxy-2alpha,3beta-dihydroxy-4alpha-epoxydehydrocostuslactone	Sesquiterpene lactones	1	795753	1	1	1	1		1	1	1	1	1	1		8alpha-Tigloyloxy-2alpha,3beta-dihydroxy-4alpha-epoxydehydrocostuslactone [ C20H24O7, tgt= ]	(400.1433, 407889.3)(402.1544, 155900.95)(403.156, 18367.01)(404.1578, 620.28)(394.18576, 107555.56)(395.19165, 24225.775)(396.19815, 1469.156)(379.1656, 2262.47)
dehydromelitensin	Sesquiterpene lactones	1	1	1	1	1	1		1676923	1684962	1	1	1307619	1273653		dehydromelitensin [ C15H20O4, tgt= ]	(247.12682, 50976.6)(248.13004, 4096.351)(267.1523, 784.07666)
Douglanin	Sesquiterpene lactones	83583	82520	1	1	359678	345842		107163	103572	1	1	335193	336271		Douglanin [ C15 H20 O3, tgt=47.61, overall=47.61 ]	(249.14232, 13893.696)(250.14505, 758.2386)(231.13046, 12854.343)(251.15746, 15813.851)(233.14565, 1288.4375)(255.12535, 8154.885)
Altissin	Sesquiterpene lactones	1	1	1	1	1	1		1	1	1	1	1	1		Altissin [ C15H20O4, tgt= ]	(247.12677, 54004.33)(248.12994, 4513.6836)
annuolide D	Sesquiterpene lactones	83583	82520	1	1	359678	345842		107163	103572	1	1	335193	336271		annuolide D [ C15 H20 O3, tgt=47.61, overall=47.61 ]	(249.14232, 13893.696)(250.14505, 758.2386)(231.13046, 12854.343)(251.15746, 15813.851)(233.14565, 1288.4375)(255.12535, 8154.885)
13-chlorosolstitialin	Sesquiterpene lactones	478039	2709492	4858472	600078	1	1092500		1171909	625847	1	2148118	3019787	586907		13-chlorosolstitialin [ C15 H19 Cl O4, tgt=58.58, overall=58.58 ]	(301.4758, 14841.895)(284.91043, 151371.4)(286.0931, 19264.475)(287.09775, 3191.075)(300.23203, 32875.42)(300.6091, 2530.8867)(301.10867, 489.10748)(282.89584, 6127.3594)(285.29666, 1380.2122)(286.76965, 361501.03)(287.77377, 32759.818)(319.91302, 8510.841)(301.9802, 43281.652)(302.1228, 12115.232)(325.21573, 3176.8613)(324.59015, 1175.7251)(325.085, 2536.63)(327.0991, 1732.45)(305.0801, 13245.87…
crepiside D	Sesquiterpene lactones	1	1	1	1	1	1		1	1	1	1	1	1		crepiside D [ C21H28O9, tgt= ]	(425.84113, 39977.203)(426.95883, 13514.524)(427.6152, 13048.139)(428.18884, 1226.6033)(407.1607, 1461.62)(427.1859, 21678.56)(428.1891, 1455.62)(409.17657, 115872.54)(410.17935, 17555.213)(442.20453, 4211.25)(425.20535, 168.38)
15-acetoxy-8alpha-(3',4'-dihydroxy-2'-methylenebutanoyloxy)-1beta-hydroxy-7alpha,6beta-germacra-4E,10(14),11(13)-trien-12,6-olide	Sesquiterpene lactones	1	795753	1	1	1	1		1	1	1	1	1	1		15-acetoxy-8alpha-(3',4'-dihydroxy-2'-methylenebutanoyloxy)-1beta-hydroxy-7alpha,6beta-germacra-4E,10(14),11(13)-trien-12,6-olide [ C20H24O7, tgt= ]	(400.1433, 407889.3)(402.1544, 155900.95)(403.156, 18367.01)(404.1578, 620.28)(394.18576, 107555.56)(395.19165, 24225.775)(396.19815, 1469.156)(379.1656, 2262.47)
Apigenin arabinoside-glucoside	Sesquiterpene lactones	1	1	1	1	1	1		1	1	1	1	95856	97078		Apigenin arabinoside-glucoside [ C26 H28 O14, tgt= ]	(565.1465, 19822.766)(566.14905, 3164.275)(583.1839, 7952.45)(584.18713, 703.415)
corilagina	Sesquiterpene lactones	1	1	144045	136916	276708	242144		695684	682434	1	843994	213063	196952		corilagina [ C27 H22 O18, tgt= ]	(635.08124, 10095.436)(636.0849, 1821.96)(621.097, 1593.58)(657.062, 2429.7854)
Telekin	Sesquiterpene lactones	83583	82520	1	1	359678	345842		107163	103572	1	1	335193	336271		Telekin [ C15 H20 O3, tgt=47.61, overall=47.61 ]	(249.14232, 13893.696)(250.14505, 758.2386)(231.13046, 12854.343)(251.15746, 15813.851)(233.14565, 1288.4375)(255.12535, 8154.885)
11betaH,13-Dihydro-10-epi-8-deoxycumambrin?B	Sesquiterpene lactones	1	144305	183413	1	752388	801519		97336	1	1	1	802949	784994		11betaH,13-Dihydro-10-epi-8-deoxycumambrin?B [ C15H22O3, tgt= ]	(251.15802, 17709.9)(252.16086, 855.3655)(233.1494, 3708.6)(273.1421, 3184.36)
Confertin	Sesquiterpene lactones	1	1	1	1	1	1		107163	103572	1	1	335193	336271		Confertin [ C15H20O3, tgt= ]	(249.14236, 15447.268)(250.14505, 758.2386)(231.13045, 12960.516)(251.15746, 15813.851)(233.1457, 1475.3401)(255.12552, 12040.025)
Anthecotuloide	Sesquiterpene lactones	83583	82520	1	1	359678	345842		107163	103572	1	1	335193	336271		Anthecotuloide [ C15 H20 O3, tgt=47.61, overall=47.61 ]	(249.14232, 13893.696)(250.14505, 758.2386)(231.13046, 12854.343)(251.15746, 15813.851)(233.14565, 1288.4375)(255.12535, 8154.885)
Hymenolin	Sesquiterpene lactones	1	1	1	1	1	1		1	1	1	1	1	1		Hymenolin [ C15H20O4, tgt= ]	(247.12677, 54004.33)(248.12994, 4513.6836)
Bakkenolide-A	Sesquiterpene lactones	118249	1	114730	1	116227	1		1	1	1	1	1	1		Bakkenolide-A [ C15 H22 O2, tgt=30.61, overall=30.61 ]	(235.1655, 5129.173)(217.15446, 3196.3777)(260.15717, 4597.265)(241.65205, 61391.074)(242.1533, 11662.35)
Tulipinolide	Sesquiterpene lactones	1	1	1	1	1	1		1	1	1	1	1	1		Tulipinolide [ C17 H22 O4, tgt= ]	(273.14203, 14875.055)(274.14508, 891.3625)(275.1567, 126.57)(290.1758, 1688.85)
Spicatin	Sesquiterpene lactones	992055	1024644	173588	178637	1878739	1833526		160870	154204	1	2807812	1807863	1704645		Spicatin [ C27 H32 O10, tgt=36.32, overall=36.32 ]	(516.7567, 6180.868)(519.8795, 36415.598)(520.2139, 20763.86)(503.2032, 2806.065)(503.87234, 2090.2856)(505.2163, 3399.304)(518.68677, 4478.5312)(520.2355, 940.56)(542.94836, 1532.445)(525.8608, 569.97534)
ixernoside	Sesquiterpene lactones	240643	219512	1791865	392976	360621	381295		735203	1396935	1	1	278395	297175		ixernoside [ C21 H35 O10, tgt=52.18, overall=52.18 ]	(431.21353, 3568.0798)(433.23303, 327.13)(447.24323, 21563.66)(448.24622, 4163.171)(449.2573, 568.78)(471.21094, 21268.896)(472.71957, 6098.3765)(473.22617, 17026.66)(453.7034, 1659.1549)(455.2133, 1664.7334)
artabsine	Sesquiterpene lactones	1	1	1	1	1	1		1	1	1	1	1	1		artabsine [ C15H20O3, tgt= ]	(249.14241, 17469.957)(250.14505, 758.2386)(251.15746, 15813.851)
ixerin K	Sesquiterpene lactones	1	1	1	1	1	1		1	1	1	1	1	1		ixerin K [ C15H22O4, tgt= ]	(249.14241, 17353.215)(250.14505, 744.1085)(251.15747, 15721.736)
Reynosin	Sesquiterpene lactones	83583	82520	1	1	359678	345842		107163	103572	1	1	335193	336271		Reynosin [ C15 H20 O3, tgt=47.61, overall=47.61 ]	(249.14232, 13893.696)(250.14505, 758.2386)(231.13046, 12854.343)(251.15746, 15813.851)(233.14565, 1288.4375)(255.12535, 8154.885)
4alpha,15,11beta,13-tetrahydroridentin B	Sesquiterpene lactones	1	1	1	1	1	1		1	1	1	1	1	1		4alpha,15,11beta,13-tetrahydroridentin B [ C15H22O4, tgt= ]	(249.1426, 21169.215)(250.1444, 1548.425)(251.1576, 15142.885)
Sitostanyl ferulate	Sesquiterpene lactones	1090586	1237270	4236718	4512495	3839626	4013177		176059	6868957	1	11971429	3521212	3363208		Sitostanyl ferulate [ C39 H60 O5, tgt=53.13, overall=53.13 ]	(609.4417, 84204.055)(610.44446, 29590.107)(611.44696, 4337.5044)(612.4502, 319.68)(593.44635, 1832.9634)(611.10724, 84693.73)(612.00256, 29560.037)(611.4482, 4694.6177)(595.4618, 1306.0349)(609.2985, 13288.711)(611.1359, 6420.89)(614.99255, 6333.514)(615.8585, 2028.4114)
arnidiolo/faradiolo	Sesquiterpene lactones	162793	223285	1	1	1	1		1	1	1	1	1	1		arnidiolo/faradiolo [ C30 H50 O2, tgt=46.16, overall=46.16 ]	(447.396, 2317.165)(464.42258, 3905.8184)(469.3787, 30225.396)(470.38135, 6116.0684)
Artesin	Sesquiterpene lactones	1	144305	183413	1	752388	801519		97336	1	1	1	802949	784994		Artesin [ C15H22O3, tgt= ]	(251.15802, 17709.9)(252.16086, 855.3655)(233.1494, 3708.6)(273.1421, 3184.36)
Cumambranolide	Sesquiterpene lactones	83583	82520	1	1	359678	345842		1	1	1	1	1	1		Cumambranolide [ C15 H20 O3, tgt=47.61, overall=47.61 ]	(249.14227, 14790.352)(250.14474, 986.3451)(231.1305, 12748.17)(251.15741, 15357.457)(233.1456, 1101.535)(255.1252, 4269.745)
dihydrosantamarin	Sesquiterpene lactones	1	1	183413	1	752388	801519		97336	1	1	1	802949	784994		dihydrosantamarin [ C15H22O3, tgt= ]	(251.15796, 18960.68)(252.16086, 855.3655)(233.14934, 3647.3235)(273.1421, 3184.36)
Ubiquinone	Sesquiterpene lactones	1	1	1	88855	1	1089472		1	1	1	1	1	1634573		Ubiquinone [ C59 H90 O4, tgt= ]	(844.67303, 876.60004)(880.7306, 23947.38)(881.7329, 4554.98)(867.6584, 1915.4966)
11-epiartesin	Sesquiterpene lactones	1	1	183413	1	752388	801519		97336	1	1	1	802949	784994		11-epiartesin [ C15H22O3, tgt= ]	(251.15794, 20429.877)(252.16086, 855.3655)(233.14935, 3672.5352)(273.1421, 3184.36)
stigmasterolo	Sesquiterpene lactones	432667	489948	474403	445213	941336	880963		289827	311594	1	1	623328	619179		stigmasterolo [ C29 H48 O, tgt=49.22, overall=49.22 ]	(413.37088, 14515.408)(414.3739, 2530.813)
Spinacetin 3-O-glucosyl-(1-6)-[apiosyl(1-2)]-glucoside	Sesquiterpene lactones	1	1	1	1	1	1		1	1	1	1	1	1		Spinacetin 3-O-glucosyl-(1-6)-[apiosyl(1-2)]-glucoside [ C34 H42 O22, tgt= ]
Pleniradin	Sesquiterpene lactones	1	1	1	1	1	1		1	1	1	1	1	1		Pleniradin [ C15H20O4, tgt= ]	(247.12677, 54004.33)(248.12994, 4513.6836)
Bakkenolide A	Sesquiterpene lactones	118249	1	114730	1	116227	1		1	1	1	1	1	1		Bakkenolide A [ C15 H22 O2, tgt=30.61, overall=30.61 ]	(235.1655, 5129.173)(217.15446, 3196.3777)(260.15717, 4597.265)(241.65205, 61391.074)(242.1533, 11662.35)
Picriside?C	Sesquiterpene lactones	1	24964810	1	1	10250425	10063752		4722007	4719923	1	1	10731022	10238765		Picriside?C [ C21H30O8, tgt= ]	(411.63867, 206394.39)(412.64447, 36624.617)(413.20416, 31722.45)(414.1991, 3776.32)(394.1924, 1464.5465)(414.22556, 3579.875)(433.187, 1502.4)(419.18262, 115113.84)(420.1854, 14381.638)
15-hydroxy-4beta,15-dihydrorecynosin	Sesquiterpene lactones	1	1	1	1	1	1		306248	304552	1	1	998271	960489		15-hydroxy-4beta,15-dihydrorecynosin [ C15H22O4, tgt= ]	(267.15228, 9371.635)(268.15405, 845.565)(249.14241, 17353.215)(250.14505, 744.1085)(251.15747, 15721.736)(275.14172, 830.54)
Spiciformin	Sesquiterpene lactones	1	1	1	1	1	1		1	1	1	1	1	1		Spiciformin [ C15H20O4, tgt= ]	(247.12677, 54004.33)(248.12994, 4513.6836)
Damsin	Sesquiterpene lactones	83583	82520	1	1	359678	345842		107163	103572	1	1	335193	336271		Damsin [ C15 H20 O3, tgt=47.61, overall=47.61 ]	(249.14232, 13893.696)(250.14505, 758.2386)(231.13046, 12854.343)(251.15746, 15813.851)(233.14565, 1288.4375)(255.12535, 8154.885)
Linalolo	Sesquiterpene lactones	157657	149200	1589233	1	96792	94593		1	1	1	916824	1	93110		Linalolo [ C10 H18 O, tgt=80.25, overall=80.25 ]	(155.14044, 407.90002)(137.13005, 25054.492)(138.133, 2959.13)(157.14801, 2827.24)(177.1245, 12130.686)(178.1289, 1339.515)
Hypochaerin	Sesquiterpene lactones	83583	82520	1	1	359678	345842		107163	103572	1	1	335193	336271		Hypochaerin [ C15 H20 O3, tgt=47.61, overall=47.61 ]	(249.14232, 13893.696)(250.14505, 758.2386)(231.13046, 12854.343)(251.15746, 15813.851)(233.14565, 1288.4375)(255.12535, 8154.885)
5alpha-hydroxy-4alpha,15-epoxy-11alphaH-eudesman-12,8beta-olide	Sesquiterpene lactones	970739	952753	1	1048912	1035907	1003260		306248	304552	1	1	998271	960489		5alpha-hydroxy-4alpha,15-epoxy-11alphaH-eudesman-12,8beta-olide [ C15 H22 O4, tgt=51.18, overall=51.18 ]	(267.15228, 13086.07)(268.15396, 1143.2957)(249.14241, 17353.215)(250.14505, 744.1085)(251.15747, 15721.736)(289.14502, 1108.1499)(275.14163, 913.9786)
taraxacolide-O-beta-D-glucopyranoside	Sesquiterpene lactones	970739	952753	1	1048912	1035907	1003260		306248	304552	1	1	998271	960489		taraxacolide-O-beta-D-glucopyranoside [ C15 H22 O4, tgt=51.18, overall=51.18 ]	(267.15228, 13086.07)(268.15396, 1143.2957)(249.14241, 17353.215)(250.14505, 744.1085)(251.15747, 15721.736)(289.14502, 1108.1499)(275.14163, 913.9786)
dihydrostenophyllolide	Sesquiterpene lactones	970739	952753	1	1048912	1035907	1003260		306248	304552	1	1	998271	960489		dihydrostenophyllolide [ C15 H22 O4, tgt=51.18, overall=51.18 ]	(267.15228, 13086.07)(268.15396, 1143.2957)(249.14241, 17353.215)(250.14505, 744.1085)(251.15747, 15721.736)(289.14502, 1108.1499)(275.14163, 913.9786)
Germacranolide	Sesquiterpene lactones	970739	952753	1	1048912	1035907	1003260		306248	304552	1	1	998271	960489		Germacranolide [ C15 H22 O4, tgt=51.18, overall=51.18 ]	(267.15228, 13086.07)(268.15396, 1143.2957)(249.14241, 17353.215)(250.14505, 744.1085)(251.15747, 15721.736)(289.14502, 1108.1499)(275.14163, 913.9786)
cichoralexin	Sesquiterpene lactones	3207100	3080271	1433090	1444854	837892	825329		946376	978655	1	1	853353	805869		cichoralexin [ C16 H17 O4, tgt=45.27, overall=45.27 ]	(258.0346, 3020.3257)(257.7805, 1759.3711)(291.9002, 1147.28)(276.14136, 322.735)(278.08792, 2257.4265)
tocoferolo	Sesquiterpene lactones	127356	121297	1	239827	515332	483014		147505	94027	1	1	337880	338511		tocoferolo [ C29 H50 O2, tgt=59.47, overall=59.47 ]	(430.66644, 10594.869)(431.6697, 931.21716)(413.37103, 15755.707)(414.37408, 2767.1611)
melitensin	Sesquiterpene lactones	970739	952753	1	1048912	1035907	1003260		306248	304552	1	1	998271	960489		melitensin [ C15 H22 O4, tgt=51.18, overall=51.18 ]	(267.15228, 13086.07)(268.15396, 1143.2957)(249.14241, 17353.215)(250.14505, 744.1085)(251.15747, 15721.736)(289.14502, 1108.1499)(275.14163, 913.9786)
11beta,13-hydro-costunolide	Sesquiterpene lactones	970739	952753	1	1048912	1035907	1003260		306248	304552	1	1	998271	960489		11beta,13-hydro-costunolide [ C15 H22 O4, tgt=51.18, overall=51.18 ]	(267.15228, 13086.07)(268.15396, 1143.2957)(249.14241, 17353.215)(250.14505, 744.1085)(251.15747, 15721.736)(289.14502, 1108.1499)(275.14163, 913.9786)
epialkhanol	Sesquiterpene lactones	970739	952753	1	1048912	1035907	1003260		306248	304552	1	1	998271	960489		epialkhanol [ C15 H22 O4, tgt=51.18, overall=51.18 ]	(267.15228, 13086.07)(268.15396, 1143.2957)(249.14241, 17353.215)(250.14505, 744.1085)(251.15747, 15721.736)(289.14502, 1108.1499)(275.14163, 913.9786)
Geigerinin	Sesquiterpene lactones	970739	952753	1	1048912	1035907	1003260		306248	304552	1	1	998271	960489		Geigerinin [ C15 H22 O4, tgt=51.18, overall=51.18 ]	(267.15228, 13086.07)(268.15396, 1143.2957)(249.14241, 17353.215)(250.14505, 744.1085)(251.15747, 15721.736)(289.14502, 1108.1499)(275.14163, 913.9786)
ixerin L	Sesquiterpene lactones	970739	952753	1	1048912	1035907	1003260		306248	304552	1	1	998271	960489		ixerin L [ C15 H22 O4, tgt=51.18, overall=51.18 ]	(267.15228, 13086.07)(268.15396, 1143.2957)(249.14241, 17353.215)(250.14505, 744.1085)(251.15747, 15721.736)(289.14502, 1108.1499)(275.14163, 913.9786)
sonchuside B	Sesquiterpene lactones	970739	952753	1	1048912	1035907	1003260		306248	304552	1	1	998271	960489		sonchuside B [ C15 H22 O4, tgt=51.18, overall=51.18 ]	(267.15228, 13086.07)(268.15396, 1143.2957)(249.14241, 17353.215)(250.14505, 744.1085)(251.15747, 15721.736)(289.14502, 1108.1499)(275.14163, 913.9786)
isosiphonodin	Sesquiterpene lactones	1	1	1	1	1	1		1	1	1	1	1	1		isosiphonodin [ C5 H6 O3, tgt= ]	(118.0628, 16390.94)(119.0653, 214.29)(137.02066, 7990.455)
1-epierivanin	Sesquiterpene lactones	970739	952753	1	1	1035907	1003260		1	1	1	1	1	1		1-epierivanin [ C15 H22 O4, tgt=51.18, overall=51.18 ]	(267.15228, 15446.91)(268.15387, 1239.2476)(249.1424, 18349.025)(250.14474, 957.8251)(251.15741, 15322.242)(289.14502, 1108.1499)(275.14166, 1031.6276)
Secoisolariciresinol di-O-glucoside	Sesquiterpene lactones	1	1	92780	104593	74053	73278		1	1	1	1	86248	92393		Secoisolariciresinol di-O-glucoside [ C32 H46 O16, tgt= ]	(709.27264, 5680.8716)(710.2753, 1186.0884)
picrioside A	Sesquiterpene lactones	1	1	1	1	1	1		1	1	1	1	1	1		picrioside A [ C36 H42 O13, tgt= ]	(683.2724, 5483.49)(684.2755, 1027.94)
1beta,6alpha-Dihydroxycostic?acid	Sesquiterpene lactones	966742	950130	1	1080307	1021170	994179		1	1	1	1	993364	950752		1beta,6alpha-Dihydroxycostic?acid [ C15 H23 O4, tgt=51.76, overall=51.76 ]	(251.15756, 15284.1045)(272.18106, 4078.8364)(273.1832, 726.4733)(250.59438, 7437.2197)
Pterostilbene	Stilbenes	1	651372	686476	585041	1076684	1147031		3170798	889458	5054747	5050971	1336963	1213846		Pterostilbene [ C16H16O3, tgt= ]	(258.31583, 1699.86)(259.1185, 1907.09)(240.05225, 2047.5063)(240.1052, 2603.27)(259.12448, 2725.701)(241.11395, 896.08997)(258.13943, 847.2072)(261.09015, 53729.004)(262.0934, 3111.8354)(263.09335, 557.4267)
Pallidol	Stilbenes	1	783411	1096136	937720	644773	645763		950369	1251774	8565887	4023228	619771	620660		Pallidol [ C28H22O6, tgt= ]	(456.6226, 43142.53)(457.48486, 7914.7925)(457.1567, 6800.49)(437.13446, 1090.32)(439.1374, 6760.39)(440.1449, 21239.65)(458.82324, 2758.67)(461.1694, 4290.525)(437.566, 63880.508)(438.64078, 11953.337)(439.56958, 1466.9586)(473.42474, 1462.3313)(457.8393, 17658.904)(460.1797, 29338.51)(478.4725, 5280.968)(459.6231, 2762.726)(463.13043, 104.805)
Resveratrol 5-O-glucoside	Stilbenes	6772423	6194713	12833603	1192810	12880165	445963		1329856	1325071	2409540	2343485	12566881	12484984		Resveratrol 5-O-glucoside [ C20 H22 O8, tgt=56.15, overall=56.15 ]	(390.75632, 84951.25)(391.96582, 15375.043)(393.13547, 2719.3647)(375.12772, 3079.8645)(374.1243, 398.35)(393.1454, 430.49)(375.3016, 29581.834)(375.8494, 4398.3843)(408.66882, 1833.255)(392.16232, 1194.675)(414.55637, 15971.937)(414.11755, 2645.09)(415.1208, 756.31)(398.28687, 15594.004)(398.87317, 2826.3)(399.12036, 641.032)
Piceatannol	Stilbenes	6429783	6340430	6021201	5910400	5802100	5822779		6040214	6089328	6197545	6312251	5968565	5890837		Piceatannol [ C14 H12 O4, tgt=82.77, overall=82.77 ]	(245.07529, 290280.84)(246.07819, 27330.082)(247.08008, 1384.2612)
Pinosylvin	Stilbenes	4120532	2234806	1545947	3049974	3062648	2869517		835140	829031	2591693	3253808	2859356	2782933		Pinosylvin [ C14 H12 O2, tgt=62.13, overall=62.13 ]	(214.32054, 10087.645)(214.09064, 1513.1183)(195.07509, 51459.746)(196.07657, 850.25256)(217.10146, 7908.878)(234.25333, 2923.1636)(217.12245, 2394.8933)(237.45398, 24281.414)(240.08833, 1005.195)(219.80855, 25157.52)(220.64476, 4316.913)(219.06532, 317.1825)
Resveratrol	Stilbenes	571680	550028	290400	279425	315130	301194		342026	285123	1025541	868012	328453	282662		Resveratrol [ C14 H12 O3, tgt=31.97, overall=31.97 ]	(228.07925, 5728.2935)(210.29234, 1498.1855)(229.0867, 251.0)(215.0857, 1228.86)(250.1256, 1308.47)(232.1151, 957.3433)(253.29335, 14963.078)(252.06844, 848.495)(233.56012, 5657.075)(234.05707, 409.56665)
e-Viniferin	Stilbenes	1	783411	1	1	1	1		1	1	1	1	1	1		e-Viniferin [ C28H22O6, tgt= ]	(455.1448, 33507.94)(456.14813, 5351.195)(457.1567, 6800.49)(437.1343, 238.77)(437.80273, 5693.2563)(439.14136, 10973.733)(442.148, 3301.75)(459.1743, 22969.107)(460.1797, 29338.51)
d-Viniferin	Stilbenes	1	783411	1	1	1	1		1	1	1	1	1	1		d-Viniferin [ C28H22O6, tgt= ]	(455.1448, 33507.94)(456.14813, 5351.195)(457.1567, 6800.49)(437.1343, 238.77)(437.80273, 5693.2563)(439.14136, 10973.733)(442.148, 3301.75)(459.1743, 22969.107)(460.1797, 29338.51)
Resveratrol 3-O-glucoside	Stilbenes	1	1	1	1	1	445963		1	1	1	1	1	1		Resveratrol 3-O-glucoside [ C20H22O8, tgt= ]	(390.13272, 6531.7563)(391.1294, 794.68)(373.1194, 642.48)(393.1454, 430.49)(377.1394, 13852.06)(378.14185, 1559.0299)(408.1629, 597.24)(391.66165, 1382.525)(417.13644, 5259.2397)(397.8705, 21971.793)(398.87317, 2826.3)(399.12036, 641.032)

## Sheet: Table S2
S. minor
	C1	C2	Fold change
Flavonoids	2.75043e+08	3.60737e+08	1.31157
Lignans	2.04525e+08	1.56846e+08	0.766879
Stilbenes	1.5626e+07	1.32062e+07	0.845142
Phenolic acids	3.10195e+08	2.00711e+08	0.647047
Other polyphenols	2.36404e+08	7.8677e+07	0.332808
Sesquiterpene lactones	6.29167e+08	4.73616e+08	0.752767
Other compounds	3.31037e+08	3.04336e+08	0.919342

## Sheet: Table S4
S. minor
Var ID (Primary)	Class	VIP score	standard dev	LOGFC[C2 vs C1]	regulation
Avenanthramide 2f	Phenolic acids	1.36988	0.954004	-2.36733	down			R2Y	0.997
Delphinidin 3-O-glucoside	Flavonoids	1.37059	0.475173	-6.02541	down			Q2	0.689
15-hydroxy-4beta,15-dihydrorecynosin	Sesquiterpene lactones	1.37387	1.53051	-12.2989	down			CV ANOVA < 0.01
Confertin	Sesquiterpene lactones	1.3745	1.52973	-11.1825	down
rhaposerine	Sesquiterpene lactones	1.38031	0.599903	-1.1825	down
Pterostilbene	Stilbenes	1.38713	0.663325	-4.33007	down
epicebellin J	Guaianolides	1.40664	0.82742	-13.8358	down
Myricetin 3-O-glucoside	Flavonoids	1.40813	0.738891	-1.18502	down
lactuside C	Sesquiterpene lactones	1.42476	0.618517	-4.14962	down
Anthemolide F	Sesquiterpene lactones	1.42476	0.618517	-4.14962	down
14-O-acetylathoin	Sesquiterpene lactones	1.42476	0.618517	-4.14962	down
Youngiaside�A	Sesquiterpene lactones	1.42476	0.618517	-4.14962	down
Crepidiaside B	Sesquiterpene lactones	1.42476	0.618517	-4.14962	down
Crepiside�E	Sesquiterpene lactones	1.42476	0.618517	-4.14962	down
11,13beta-dihydro-14-hydroxyhypocretenolide-beta-D-glucopyranoside	Sesquiterpene lactones	1.42476	0.618517	-4.14962	down
Ixerin�Y	Sesquiterpene lactones	1.42476	0.618517	-4.14962	down
Lactuside�C	Sesquiterpene lactones	1.42476	0.618517	-4.14962	down
8-O-Isobutyryl-9-O-acetylanthemolide B	Sesquiterpene lactones	1.42476	0.618517	-4.14962	down
crepiside C	Sesquiterpene lactones	1.42476	0.618517	-4.14962	down
Macrocliniside�A	Sesquiterpene lactones	1.42476	0.618517	-4.14962	down
ixerin Y	Sesquiterpene lactones	1.42476	0.618517	-4.14962	down
ixerin B	Sesquiterpene lactones	1.42476	0.618517	-4.14962	down
ainslioside	Sesquiterpene lactones	1.42476	0.618517	-4.14962	down
dehydromelitensin	Elemanolides	1.43523	1.27009	-13.0518	down
Desacetyl-beta-cyclopyrethrosin	Sesquiterpene lactones	1.43523	1.27009	-13.2518	down
Chlorohyssopifolin D	Sesquiterpene lactones	1.43903	0.537378	-1.31644	down
Chlorohyssopifolin�D	Sesquiterpene lactones	1.43903	0.537378	-1.31644	down
(6R,7R,8S,3R) 8alpha-(3,4-dihydroxy-2-methylene-butanoyloxy)-15-oxo-helianga 1(10), 4(5), 11(13) trien-6-olide	Sesquiterpene lactones	1.45316	0.387911	-1.90409	down
Secoisolariciresinol	Lignans	1.45666	0.513422	-1.04952	down
Eupatoriopicrin	Sesquiterpene lactones	1.45666	0.513422	-1.04952	down
Heliangine	Sesquiterpene lactones	1.45666	0.513422	-1.04952	down
leptocarpin	Sesquiterpene lactones	1.45666	0.513422	-1.04952	down
Sonchuside�H	Sesquiterpene lactones	1.45666	0.513422	-1.04952	down
Fastigilin B	Sesquiterpene lactones	1.45666	0.513422	-1.04952	down
Tetramethylscutellarein	Flavonoids	1.45919	0.729238	-4.98119	down
Delphinidin 3-O-arabinoside/xyloside	Flavonoids	1.46399	0.47655	-12.5577	down
2-S-Glutathionyl caftaric acid	Phenolic acids	1.48042	0.402639	-11.3214	down
15-hydroxyhypocretenolide-beta-D-glucopyranoside	Sesquiterpene lactones	1.48311	0.338106	-1.18547	down
Petunidin 3-O-(6''-acetyl-glucoside)	Flavonoids	1.51703	0.886142	-12.115	down
Vernomygdin	Sesquiterpene lactones	1.55787	0.712273	-4.53027	down
Elephantopin	Sesquiterpene lactones	1.55787	0.712273	-4.53027	down
Vernodalin	Sesquiterpene lactones	1.55787	0.712273	-4.53027	down
Caffeic acid	Phenolic acids	1.62857	0.669675	-6.33332	down
3,4-Diferuloylquinic acid	Phenolic acids	1.8282	0.72847	-17.6315	down
Apigenin	Flavonoids	1.36828	0.580128	2.15506	up
Genistein	Flavonoids	1.36828	0.580128	2.15506	up
Galangin	Flavonoids	1.36828	0.580128	2.15506	up
Baicalein	Flavonoids	1.36828	0.580128	2.15506	up
6-metil-1,3,8-triidrossiantrachinone	Anthraquinones	1.36828	0.580128	2.15506	up
Antheindurolide A	Sesquiterpene lactones	1.37	1.32697	13.9852	up
Artemissifolin	Sesquiterpene lactones	1.37	1.32697	13.9852	up
1-epierivanin	Eudesmanolides	1.37135	1.27771	13.5668	up
p-Coumaroyl malic acid	Phenolic acids	1.38243	0.573672	1.27907	up
Taraxacin	Sesquiterpene lactones	1.38906	0.698733	5.03352	up
Laserolide	Sesquiterpene lactones	1.42652	0.401561	1.73313	up
Syringic acid	Phenolic acids	1.45273	0.796851	11.0594	up
Gallic acid ethyl ester	Phenolic acids	1.45273	0.796851	11.0594	up
Formononetin	Flavonoids	1.46915	0.544447	1.19979	up
damascenone	Other	1.49652	1.27095	4.21129	up
Crysophanol	Anthraquinones	1.49947	0.877448	1.61819	up
7,4'-Dihydroxyflavone	Flavonoids	1.49947	0.877448	1.61819	up
Chrysin	Flavonoids	1.49947	0.877448	1.61819	up
Daidzein	Flavonoids	1.49947	0.877448	1.61819	up
Hydroxycaffeic acid	Phenolic acids	1.51336	0.584337	1.17787	up
Gallic aldehyde	Other polyphenols	1.53507	0.572926	6.95156	up
Gentisic acid	Phenolic acids	1.55206	0.578529	6.97985	up
3,5-Dihydroxybenzoic acid	Phenolic acids	1.55206	0.578529	6.97985	up
Protocatechuic acid	Phenolic acids	1.55206	0.578529	6.97985	up
2,6-Dihydroxybenzoic acid	Phenolic acids	1.55206	0.578529	6.97985	up
Avenanthramide 2p	Phenolic acids	1.56549	0.787102	14.2345	up
shiromool	Sesquiterpene lactones	1.57013	0.842777	4.54948	up
[truncated: 5 more rows]

## Sheet: Table S5
S. minor
Phenolic class	C1	C2
Anthocyanins	2.48095	2.98138
[truncated: 8 more rows]
